# Supplementary material for: Tumor Microenvironment–Derived Proteins Dominate the Plasma Proteome Response during Breast Cancer Induction and Progression
Source: Oxford University Press journal article supplement (doi:10.1158/0008-5472.can-11-0568), 2011-06-09
Supplement: 00085472can110568-sup-stab_4.xls [file 00085472can110568-sup-stab_4.xls]

## Sheet: FDR
IPAS	Minimum ProteinProphet Score	Sensitivity	False Discovery Rate	Predicted Number Proteins Correct	Predicted Number Proteins Incorrect
Preclinical	0.7	0.744	0.054	1406	81
Preclinical	0.8	0.681	0.031	1287	41
Preclinical	0.9	0.609	0.013	1151	16
Preclinical	0.95	0.558	0.007	1054	7
Preclinical	0.96	0.536	0.005	1014	5
Preclinical	0.97	0.513	0.004	968	4
Preclinical	0.98	0.483	0.002	912	2
Preclinical	0.99	0.454	0.001	857	1
Preclinical	1	0.386	0	730	0
0.5 cm	0.7	0.793	0.052	2552	140
0.5 cm	0.8	0.729	0.029	2345	69
0.5 cm	0.9	0.655	0.012	2109	26
0.5 cm	0.95	0.602	0.006	1939	12
0.5 cm	0.96	0.587	0.005	1890	10
0.5 cm	0.97	0.566	0.004	1823	7
0.5 cm	0.98	0.536	0.002	1725	4
0.5 cm	0.99	0.501	0.001	1611	2
0.5 cm	1	0.405	0	1304	0
1.0 cm	0.7	0.701	0.06	1894	120
1.0 cm	0.8	0.638	0.034	1722	60
1.0 cm	0.9	0.555	0.013	1500	20
1.0 cm	0.95	0.501	0.006	1352	8
1.0 cm	0.96	0.492	0.005	1327	7
1.0 cm	0.97	0.475	0.004	1282	5
1.0 cm	0.98	0.455	0.003	1228	3
1.0 cm	0.99	0.417	0.001	1125	1
1.0 cm	1	0.336	0	907	0
Regression	0.7	0.721	0.054	1196	69
Regression	0.8	0.655	0.028	1088	32
Regression	0.9	0.589	0.012	977	12
Regression	0.95	0.542	0.006	899	6
Regression	0.96	0.528	0.005	876	4
Regression	0.97	0.505	0.003	838	3
Regression	0.98	0.486	0.002	807	2
Regression	0.99	0.456	0.001	756	1
Regression	1	0.376	0	624	0

## Sheet: Preclinical
IPI	Gene	Description	Molecular Weight	SwissProt Accession	Protein Prophet Score	Total Peptides	Peptide Sequence(s)	# Indistinguishable IPIs	Indistinguishable IPIs
IPI00107952	Lyz2	lysozyme c-2.	18313	P08905,	1	57	AVNACGINCSALLQDDITAAIQCAK+DLSQYIR+GDQSTDYGIFQINSR+NGMAGYYGVSLADWVCLAQHESNYNTR+YWCNDGK	1	.
IPI00108003	Csf1r	macrophage colony-stimulating factor 1 receptor.	109179	P09581,	1	80	ASEAGQYFLMAQNK+CTELEDPMAGSTTIHLYVK+DPAHSWNLLAQEVTVVEGQEAVLPCLITDPALK+DSVSLMR+KLEFITQR+LEIPLNSDFQDNYYK+TVYFFSPWR+VIIQSQLPIGTLK+VLDSNTYVCK	2	IPI00875061;
IPI00108083	Pitx1	pituitary homeobox 1.	34075	P70314,	0.91	2	DTCNSSLASLR+GGEAKGPEDGGAGSAGCGGGAEDPAK+GPEDGGAGSAGCGGGAEDPAK+GPEDGGAGSAGCGGGAEDPAKK+QHSSFGYGGLQGPASGLNACQYNS	1	.
IPI00108125	Eif5a	eukaryotic translation initiation factor 5a-1.	16832	P63242,	1	58	GRPCKIVEMSTSKTGK+KYEDICPSTHNMDVPNIK+MADDLDFETGDAGASATFPMQCSALRK+NDFQLIGIQDGYLSLLQDSGEVR+VHLVGIDIFTGK+YDCGEEILITVLSAMTEEAAVAIK+YEDICPSTHNMDVPNIK	1	.
IPI00108189	Hint1	histidine triad nucleotide-binding protein 1.	13777	P70349,	1	12	AQVAQPGGDTIFGK+CLAFHDISPQAPTHFLVIPK	2	IPI00880795;
IPI00108535	Ceacam1	isoform long of carcinoembryonic antigen-related cell adhesionmolecule 1.	57016	P31809-1,	1	9	DMGVYTLDMTDENYR+TLTLLNVTR	4	IPI00227804;IPI00719884;IPI00896737;
IPI00108584	Fxyd2	na/k-atpase gamma subunit splice variant a1.	8634	Q04646-1,	0.97	2	GTENPFEYDYETVR+KGGLIFAGLAFVVGLLIILSKR	3	IPI00227916;IPI00227917;
IPI00108762	.	similar to smt3b protein isoform 3.	10744	.	0.98	2	VAGQDGSVVQFK	14	IPI00122955;IPI00129580;IPI00165706;IPI00379383;IPI00652964;IPI00751963;IPI00761765;IPI00848631;IPI00848890;IPI00849486;IPI00849725;IPI00880594;IPI00881242;
IPI00108774	Rad23b	uv excision repair protein rad23 homolog b.	43517	P54728,	1	13	AVEYLLMGIPGDR+EQVIAALR+IDIDPEETVK+NFVVVMVTKPK+NQPQFQQMR+QIIQQNPSLLPALLQQIGR	2	IPI00890867;
IPI00109044	2900073G15Rik	myosin light chain, regulatory b-like.	19895	.	1	13	ATSNVFAMFDQSQIQEFK+DGFIDKEDLHDMLASMGK+FTDEEVDELYR+GNFNYIEFTR+LNGTDPEDVIR	2	IPI00758006;
IPI00109061	Tubb2b	tubulin beta-2b chain.	49953	Q9CWF2,	0.98	1	FPGQLNADLR+LTTPTYGDLNHLVSATMSGVTTCLR	7	IPI00109073;IPI00117352;IPI00169463;IPI00338039;IPI00458204;IPI00850173;
IPI00109109	Sod2	superoxide dismutase [mn], mitochondrial.	24603	P09671,	0.97	2	AIWNVINWENVTER+LGPVAGAAGSR	1	.
IPI00109311	Slc9a3r1	isoform 1 of ezrin-radixin-moesin-binding phosphoprotein 50.	38600	P70441-1,	1	29	AVDPDSPAEASGLR+EALVEPASESPRPALAR+LLVVDPETDER+LVEVNGENVEK+MSADAAAGEPLPR+QHGDVVSAIK+SASSDTSEELNSQDSPK+SEQAEPPAAADTHEAGDQNEAEK	1	.
IPI00109324	Retnla	resistin like alpha.	15061	Q9EP95,	0.96	15	ELLANPANYPSTVTK	1	.
IPI00109437	Pir	pirin.	32066	Q9D711,	0.95	2	NLDPFLLFDEFK	2	IPI00831563;
IPI00109482	Ddah1	n(g),n(g)-dimethylarginine dimethylaminohydrolase 1.	31381	Q9CWS0,	0.99	2	DENATLDGGDVLFTGR+EFFVGLSKR+MAGLGHPSAFGR+SQGEEVDFAR	1	.
IPI00109588	Col4a1	collagen alpha-1(iv) chain.	160679	P02463,	0.94	14	GDHGLPGSSGPR+GDMGLPGVPGFQGQK+GDPGLSGTPGSPGLPGPK+GDQGLAGFPGSPGEK+GEAGLPGTPGPTGPAGQKGEPGSDGIPGSAGEKGEQGVPGR+GEQGFMGPPGPQGQPGLPGTPGHPVEGPK+GEVGFPGLAGSPGIPGVK+GFPGIPGMPGSPGLPGLQGPVGPPGFTGPPGPPGPPGPPGEK+GLQGPPGPK+GPLGPPGLPGFSGNPGPPGLPGMK+GQAGFPGGPGSPGLPGPK+GQKGESCLACDTEGLR+GVPGIPGSQGVPGSPGEK+VVPLPGPPGAAGLPGSPGFPGPQGDR	1	.
IPI00109696	Pin4	peptidyl-prolyl cis-trans isomerase nima-interacting 4.	13815	Q9CWW6,	0.96	17	FSEVATQYSEDK+HILCEK	1	.
IPI00109709	Pycard	apoptosis-associated speck-like protein containing a card.	21459	Q9EPB4,	1	8	DAILDALENLSGDELK+EESGAVAAAASVPAQSTAR	1	.
IPI00109813	Hnrnpa0	12 days embryo head cdna, riken full-length enriched library,clone:3010025e17 product:heterogeneous nuclear ribonucleoprotein a0(hnrnp a0) homolog.	30530	.	1	3	GDVAEGDLIEHFSQFGAVEK+LFIGGLNVQTSESGLR+SGGGGGGGGSWGGR	1	.
IPI00109860	Rbm8a	isoform 2 of rna-binding protein 8a.	19760	Q9CWZ3-2,	0.95	1	EDYDSVEQDGDEPGPQR	2	IPI00410937;
IPI00109966	B2m	beta-2-microglobulin.	13823	P01887,	1	208	DWSFYILAHTEFTPTETDTYACR+HDSMAEPK+HPPENGKPNILNCYVTQFHPPHIEIQMLK+TPQIQVYSR+TVYWDR+TVYWDRDM+VEMSDMSFSK+VKHDSMAEPK	1	.
IPI00110350	Armet	protein armet.	20374	Q9CXI5,	0.89	4	DVTFSPATIEEELIK+ILDDWGEMCK	3	IPI00404019;IPI00775791;
IPI00110366	Tnfrsf21	tumor necrosis factor receptor superfamily member 21.	71983	Q9EPU5,	1	7	AHTDCLGQNLEVVKPGTK+CHDCSQPCPWPMIER+GTFSDVPSSVMK+TLSLPGTYR+VCSSCPAGTFTR	2	IPI00653815;
IPI00110402	Grm1	isoform 1 of metabotropic glutamate receptor 1.	133212	P97772-1,	0.99	52	DEKDGLNRCLPDGQTLPPGR+RYNWTYVSAVHTEGNYGESGMDAFK	4	IPI00281619;IPI00281620;IPI00757201;
IPI00110468	Papln	papilin.	138904	.	1	116	AEGFPVPTIEWQR+AEQCAEFDGTDFQGR+CELNCIPK+CLLPSAQGSCGDWAAR+CLQCGGDGSSCYPVTGTFDGNDLSR+CVDLQSSKPAEMEACNR+DAVVDGTPCEPGQR+DGQLVSSPR+DICVDGVCR+DQPTLTEPCVQEACPVFR+EGQDPNLSSAGR+ELTITGLPPAVTVAEGDTAR+FGCCYDNVASAAGPLGEGCVGQPSYAYPVR+FWYGGCHGNANNFASEQECMNTCR+GPTSEPLVIELLSQESNPGVHYEYYLPANDPGR+GVEGDLAPER+GYNQIFIIPAGATSIR+HKDAVVDGTPCEPGQR+HQVQPDGSLVISR+LAGSEPSLVQAAPGQAVQLFCPGNIPSEFQAGWQK+LLCVVAGESVNIR+LPSPSGSPWR+Q…	2	IPI00880383;
IPI00110588	Msn	moesin.	67767	P26041,	0.94	1	TQEQLASEMAELTAR	1	.
IPI00110616	Eraf	alpha-hemoglobin-stabilizing protein.	11832	Q9CY02,	1	27	AMTEFQQELSTLGSQFLAK+KLVHGEQEEQDR+LVHGEQEEQDR+SKEPPSNTLPSS	1	.
IPI00110658	Hba-a1	13 days embryo liver cdna, riken full-length enriched library,clone:2510040b16 product:hemoglobin, beta adult major chain, fullinsert sequence.	15202	.	0.99	338	FLASVSTVLTSK+IGGHGAEYGAEALER+KVADALANAAGHLDDLPGALSALSDLHAHK+LLSHCLLVTLASHHPADFTPAVHASLDK+LRVDPVNFK+MFASFPTTK+QHQGCLGK+TYFPHFDVSHGSAQVK+TYFPHFDVSHGSAQVKGHGK+TYFPHFDVSHGSAQVKGHGKK+VADALANAAGHLDDLPGALSALSDLHAHK+VDPVNFK	1	.
IPI00110684	Ppa1	inorganic pyrophosphatase.	32667	Q9D819,	1	31	DVFHMVVEVPR+GISCMNTTVSESPFK+GQYISPFHDVPIYADK+GYIWNYGAIPQTWEDPGHSDK+HTGCCGDNDPIDVCEIGSK+LKPGYLEATVDWFR+VIAINVDDPDAANYK+VLGILAMIDEGETDWK+YVANLFPYK	1	.
IPI00110721	Glod4	isoform 1 of glyoxalase domain-containing protein 4.	33317	Q9CPV4-1,	1	3	ATVQVVILADPDGHEICFVGDEAFR+ESHSILTPLVSLDTPGK+IAFSCPQKELPDLEDLMKR+LELQGIQGAVDHAAAFGR+QRALLGYADNQCKLELQGIQGAVDHAAAFGR+VAEGIFETEAPGGYK	3	IPI00112630;IPI00831130;
IPI00110808	H2-Ea	h-2 class ii histocompatibility antigen, e-d alpha chain.	29117	P01904,	0.9	3	FFFIAVLMSSQK+MATIGALVLR	2	IPI00114493;
IPI00111013	Ctsd	cathepsin d.	44954	P18242,	1	5	AIGAVPLIQGEYMIPCEK+FDGILGMGYPHISVNNVLPVFDNLMQQK+TMTEVGGSVEDLILK	3	IPI00404551;IPI00881091;
IPI00111210	Ppbp	putative uncharacterized protein.	12252	.	1	62	LRPTSSCTR+SDGMDPYIELR+TCLDPNAPGVK+TCLDPNAPGVKR	1	.
IPI00111234	Magi3	isoform 2 of membrane-associated guanylate kinase, ww and pdz domain-containing protein 3.	123360	Q9EQJ9-2,	1	36	DGPAAQDGK+EYNMGLFILR+QVLDLMTTAAR+STMGFGFTIIGGDRPDEFLQVK	5	IPI00761515;IPI00880273;IPI00894755;IPI00895103;
IPI00111315	Apoa2	apolipoprotein a-ii.	11319	P09813,	1	4797	AKTSEIQSQVK+AYFEKTHEQLTPLVR+QADGPDMQSLFTQYFQSMTEYGK+QADGPDMQSLFTQYFQSMTEYGKDLVEK+QADGPDMQSLFTQYFQSMTEYGKDLVEKAK+RQADGPDMQSLFTQYFQSMTEYGK+SAGTSLVNFFSSLMNLEEKPAPAAK+THEQLTPLVR+TSEIQSQVK+TSEIQSQVKAYFEK+TSEIQSQVKAYFEKTHEQLTPLVR	1	.
IPI00111320	Snx27	isoform 1 of sorting nexin-27.	60989	Q3UHD6-1,	0.9	6	ENIFQMAR+MADEDGEGIHPSAPHR+NSTTDQVYQAIAAK+VFCELK	1	.
IPI00111359	Gsr	isoform mitochondrial of glutathione reductase, mitochondrial.	53663	P47791-1,	1	9	ADFDNTVAIHPTSSEELVTLR+ALLTPVAIAAGR+GHILVDEFQNTNVK+GVYAVGDVCGKALLTPVAIAAGR+IYSTAFTPMYHAVTTR+KTSSGLELQVVTSVPGR+LGGTCVNVGCVPK+LNTIYQNNLTK	2	IPI00760002;
IPI00111388	Arr3	arrestin-c.	41921	Q9EQP6,	0.97	133	EVHYHGEAISVHVSINNYTNK+QVAPAEPTSIQGPLTALQER	1	.
IPI00111560	Set	isoform 1 of protein set.	33378	Q9EQU5-1,	1	4	EQQEAIEHIDEVQNEIDR+IDFYFDENPYFENK+VEVTEFEDIK	6	IPI00347814;IPI00410883;IPI00754518;IPI00755843;IPI00850678;
IPI00111657	Igh-1a	10 day old male pancreas cdna, riken full-length enriched library,clone:1810060o09 product:immunoglobulin heavy chain 1 (serum igg2a),full insert sequence.	51699	P01865,	1	38	APQVYVLPPPAEEMTK+APQVYVLPPPAEEMTKK+NTATVLDSDGSYFMYSK+TTAPSVYPLAPVCGGTTGSSVTLGCLVK+VPITQNPCPPLK	2	IPI00556788;
IPI00111663	Ghrl	isoform 1 of appetite-regulating hormone.	13207	Q9EQX0-1,	1	10	FLQDILWEEVK+GQAEETEEELEIR	2	IPI00230764;
IPI00111794	Siae	isoform 1 of sialate o-acetylesterase.	60775	P70665-1,	1	7	ELSDTAAYQSVR+QTFHYGSQGQTDR	3	IPI00459781;IPI00606747;
IPI00111807	F8	coagulation factor viii.	266150	Q06194,	1	19	DLNSGLIGALLVCK+DMWKSKEK+FSSLYISQFIIMYSLDGKK+IEPQFEEIAEMLK+LNHMLNRTTSTKNK+MELMGCDLNSCSIPLGMESK+MSTSFPFNTSIMYK+RSPFQNK+SLPGLIGCHR+VNSEIQEVTALIHDGTLLGK	1	.
IPI00111831	Naca	nascent polypeptide-associated complex subunit alpha, muscle-specificform.	220601	P70670,	1	17	ALKNNSNDIVNAIMELTM+EAPATPSVGVIAVSGEISPSPK+EIPVSCIGATHHALDNPSAISVAPATHVPPPTSSGLVSSK+ENSATLPPK+ESSATSSSKRAPK+ETPAPSPEGATTAPVQIPPSPRK+ETPPGGVTAMPLEIPSAPQK+ETPVTPAVPPVK+ETSAPSEGVTAVPLEIPPSPR+ETSLEGATAVPLEIPPSHK+GAPAMTSKK+IEDLSQQAQLAAAEK+KGPTAFTEMLAAPAPESALAITAPIQK+LSQTVGPK+SPVSDTLSGALTSPPPK+SSSAPLSLVALAPHSVQK+VLMSSPPKK+VPPEAVSASVAPKPAPAASLTLAPSPVAPLPPK	1	.
IPI00111876	Abhd14b	abhydrolase domain-containing protein 14b.	22451	Q8VCR7,	1	7	AVAIDLPGLGR+TPALIVYGDQDPMGSSSFQHLK	1	.
IPI00111946	1810009N02Rik	10 day old male pancreas cdna, riken full-length enriched library,clone:1810009n02 product:hypothetical maf-like protein containingprotein, full insert sequence.	25066	.	0.96	2	TGSEEVTSQTTGIDSK	1	.
IPI00112073	Pnlip	10 day old male pancreas cdna, riken full-length enriched library,clone:1810007a24 product:pancreatic triglyceride lipase homolog.	18324	.	0.97	2	FLLYTNENPDNYQLITSDASNIR	2	IPI00420441;
IPI00112138	1810034K20Rik	magnesium-dependent phosphatase 1.	18582	Q9D967,	1	8	DGMSLQTLTQGLETFAK+GQNIQLYPEVPEVLGR+NIIDVGRLGVTCIHIRDGMSLQTLTQGLETFAK+TGVPFSQMVFFDDENR+TSEIQGANQLLELFDLGK	1	.
IPI00112223	Efhd2	ef-hand domain-containing protein d2.	26791	Q9D8Y0,	0.93	3	ADLNQGIGEPQSPSR+SMIQEVDEDFDSK	2	IPI00226872;
IPI00112446	Scg3	secretogranin-3.	53326	P47867,	1	5	DFINQQADAYVEK+LLNLGLITESQAHTLEDEVAEALQK+SPPFDNQLNVEDADSTK	1	.
IPI00112485	Igfbp3	insulin-like growth factor binding protein 3.	31687	.	1	98	ALSQCAPPPTAPACTELVR+EGDACGVYTER+EMEDTLNHLK+EPGCGCCLTCALR+FLNVLSPR+GFCWCVDK+GKDDVHCLSVQSQ+VDYESQSTDTQNFSSESK+YGQPLPGYDTK+YKVDYESQSTDTQNFSSESK	1	.
IPI00112487	Igfbp4	insulin-like growth factor-binding protein 4.	27807	P47879,	1	75	CRPPVGCEELVR+CWCVDR+EEPRPVPQGSCQSELHR+EPGCGCCATCALGLGMPCGVYTPR+GELDCHQLADSFQE+LPGGLEPK+QCHPALDGQR+THEDLFIIPIPNCDR+TLMHGQGVCTELSEIEAIQESLQTSDK	1	.
IPI00112507	Igfbp6	insulin-like growth factor-binding protein 6.	25403	P47880,	1	5	GGCVEEEDAGSPADGCTEAGGCLR+HLDSVLQQLQTEVFR+TSAAPIRPNPVQDSEMGPCR	2	IPI00885900;
IPI00112614	Abca1	atp-binding cassette sub-family a member 1.	253974	P41233,	0.84	19	DVESSLSSCR+ETDLLSGMDGK+FLWNCALSIVK+IVCGHPEGGGLK+KMLPVCPPGAGGLPPPQRK+LEPIPTEVR+LPPLNDEDEDVR+LSTAMALIGGPPVVFLDEPTTGMDPK+MLPVCPPGAGGLPPPQR+MLPVCPPGAGGLPPPQRKQK+NPEDVQSPNGSVYTWR+QEVMFLTNVNSSSSSTQIYQAVSR+TGVYVQQMPYPCYVDDIFLR	2	IPI00889843;
IPI00112719	Alad	delta-aminolevulinic acid dehydratase.	36024	P10518,	0.97	1	AGADIIITYFAPQLLK+DEQGSAADSEDSPTIEAVR+VPKDEQGSAADSEDSPTIEAVR	1	.
IPI00112818	Usp29	ubiquitin carboxyl-terminal hydrolase 29.	97797	Q9ES63,	0.82	3	KMPLSMSNTTGGQK+KMPLSMSNTTGGQKR+KTEPSSSSAEVNK+NTCAGSAGTK+QAWLLYSDVQVFESSDPSIQENR+TEPSSSSAEVNKDIPK	1	.
IPI00112858	Svep1	isoform 1 of sushi, von willebrand factor type a, egf and pentraxindomain-containing protein 1.	387457	A2AVA0-1,	0.9	12	AVLENTTSGPSLLFSCHR+CHTATCQSPCLNGGK+CMEGFVLNTSAK+CPAPPQVPNGVADGLDYGFK+EGHALQGPSVLK+ELNDMASTPK+GTCTDGLASYR+LCEEPICILPCLNGGR+LDYSYDHFLDVVQETPTDVGK+LTCQGNAQWDGPEPR+NQATCVDELNSYSCK+QPARPGMTCQLSCR+RCLPNGSWSGSSPSCLPCR+RGAVDISACGVPCPVGEFSR+VENGFLEHTTGR	1	.
IPI00112904	Mmp2	72 kda type iv collagenase.	74102	P33434,	1	16	FFGLPQTGDLDQNTIETMR+FQGTSYNSCTTEGR+GEIFFFK+IHDGEADIMINFGR+KYGFCPETAMSTVGGNSEGAPCVFPFTFLGNK+QDIVFDGIAQIR+WEHGDGYPFDGK	1	.
IPI00113057	Klkb1	plasma kallikrein.	71369	P26262,	1	441	ADTNTIYTNCWVTGWGYTK+ATIPLVPNEECQK+CLLFSFLAVTPPK+CQFFIYSLLPQDCK+EGGTDACKGDSGGPLVCK+ELIIHQEYK+EQGETQNILQK+ESITGTLPR+FGCFMK+GDSGGPLVCK+GGDLAAIYTPDAQYCQK+HSASGTPTSIK+IKELIIHQEYK+ITYGMQGSSGYSLR+IYGGILSLSEITK+KDQPGVYTK+LCTNNFHCQFFTYATSAFYRPEYR+LVSQTHLCGGSIIGR+QMICAGYK+QWVLTAAHCFDGIPYPDVWR+SADNLVSGFSLK+SGRPSPPIPQENAISGYSLLTCR+TDNIEECQK+TGAISGHSLK+VSEGNYDIALIK+VSEYMDWILEK	1	.
IPI00113223	Fasn	fatty acid synthase.	272428	P19096,	1	33	AKTGGTYGEDLGADYNLSQVCDGK+CILLSNLSNTSHAPK+CPAGVVPACHNSEDTVTISGPQAAVNEFVEQLK+GETVLIHSGSGGVGQAAISIALSLGCR+GTNTGVWVGVSGSEASEALSR+KALHLVGLK+KAVAHGDGDTQR+MTPGCEAEAEAEALCFFIK+SSCTIIPLMK+YMAQGKHIGKVLVQVR	1	.
IPI00113227	Serpind1	heparin cofactor 2.	54497	P49182,	1	112	EALENIDPATQMLILNCIYFK+EFYFAEAQEANFPDPAFISK+FAFNLYR+FPVEMTHNHNFR+FTVDRPFLFLVYEHR+GETHEEVHSVLHFR+NFGYTLR+NYNLVEVLK+QFPIREDFK+SVNGLYIQK+TLEAQLTPQVVER+TSCLLFMGK+YEVTTIHNLFR	1	.
IPI00113257	Ube2v1	isoform 1 of ubiquitin-conjugating enzyme e2 variant 1.	16355	Q9CZY3-1,	1	27	GVGDGTVSWGLEDDEDMTLTR+LLEELEEGQK+VILQELR+VNMSGVSSSNGVVDPR+WQNSHSIKVILQELRR+WTGMIIGPPR+YPEAPPSVR	1	.
IPI00113287	Psmd9	10 days embryo whole body cdna, riken full-length enriched library,clone:2610305b01 product:proteasome (prosome, macropain) 26s subunit,non-atpase, 9, full insert sequence.	27926	.	1	27	AAAVSDIQDLMR+ADVDLYQVR+AESSEARAAAVSDIQDLMRR+ANYDVLESQK+GIGMNEPLVDCEGYPR+LASNSPVLPQAFAR+QVEEALHQLHAR	3	IPI00654099;IPI00761650;
IPI00113302	Otof	isoform 1 of otoferlin.	227033	Q9ESF1-1,	0.89	1	DPMKPSQILTR+EAGYDPTYGMFQGIPSNDPINVLVR+ISGEKSFR+KAFIGENK+MEEFFLFGAFLEASMIDRK+QHETSGTDLEEKEEMESAEGLKGPMK+WAILSDPDDISAGLKGYVK	3	IPI00223385;IPI00856230;
IPI00113377	Rplp1	60s acidic ribosomal protein p1.	11475	P47955,	0.96	4	AAGVSVEPFWPGLFAK	5	IPI00118632;IPI00134920;IPI00661192;IPI00753932;
IPI00113427	Lyz1	lysozyme c-1.	18418	P17897,	1	5	DLSQYIR+LADWVCLAQHESNYNTR+NACGINCSALLQDDITAAIQCAK+SKNACGINCSALLQDDITAAIQCAK+YWCNDGK	1	.
IPI00113457	Mbl2	mannose-binding protein c.	25957	P41317,	1	1333	AEFDTSEIDSEIAALR+AEFDTSEIDSEIAALRSELR+ALCSEFQGSVATPR+ALRNWVLFSLSEK+DIAYLGITDVR+GDRAEFDTSEIDSEIAALR+KYFVSSVK+NAEENSAIQK+NWVLFSLSEK+VEGSFEDLTGNR+WNDVPCSDSFLAICEFSD+YFVSSVK+YTNWNDGEPNNTGDGEDCVVILGNGK	1	.
IPI00113475	Col4a6	collagen, type iv, alpha 6.	164034	.	1	64	DCHGVCTCFPEK+GDIGQPGSTGKR+GDQGQTLGISGSPGPKGQPGELGFKGVK+GEPGIPGLPGPPGATGQTNTIK+GEPGPPGFPGMSGPPGVPEFGSTGEK+GGPGSPGLMHLPGLPGFPGVR+GHDGPIGPPGIGLPGPPGPR+GLNGKPGMLGPK+GNPGTSGPPGQPGPSGSTDPFGIK+GNQGLPGFSGLSGELGLK+GPDSFTDADGAVISGYPGDPGVLGLPGLR+TTFGEAGLPGR	1	.
IPI00113480	Mpo	myeloperoxidase.	81071	P11247,	1	7	DYLPLVLGPAAMKK+FPNDQLTK+IGLDLPALNMQR+SCPACTR+VGQLLACLIGTQFRK+WLPAEYEDGVSMPFGWTPGVNR	2	IPI00895004;
IPI00113517	Ctsb	cathepsin b.	37280	P10605,	1	112	EQWSNCPTIGQIR+GENHCGIESEIVAGIPR+HEAGDMMGGHAIR+HFGYTSYSVSNSVK+ILGWGVENGVPYWLAANSWNLDWGDNGFFK+LCGTVLGGPK+NFYNVDISYLK+NGPVEGAFTVFSDFLTYK+SCEAGYSPSYKEDK+VAFGEDIDLPETFDAR	1	.
IPI00113536	Anp32b	isoform 2 of acidic leucine-rich nuclear phosphoprotein 32 familymember b.	37447	Q9EST5-2,	0.97	1	DISTLEPLKR+LLPQLSYLDGYDR	3	IPI00831258;IPI00850695;
IPI00113547	Scgb1a1	uteroglobin.	10519	Q06318,	1	14	ILTSPLCK+LVDTLPQETR+RLVDTLPQETR	1	.
IPI00113606	Agk	isoform 1 of acylglycerol kinase, mitochondrial.	46976	Q9ESW4-1,	0.91	40	ERPPIEPEETPPRPSLYR+NAAPILHLSGMDVTVVK+RTDEATFSK+YWYLGPLK	1	.
IPI00113610	Pi16	protease inhibitor 16.	53650	.	1	674	AESPEAEAESPLSSEALVPVLPAQER+AQVSPPASDMLQMR+CVWGHNK+EPEAESPK+ETGTPSLATSETLHFSVTK+IGCGSHFCETLQGVEEANIHLLVCNYEPPGNVK+KPYQEGTPCSQCPLGYSCENSLCEPMR+KPYQEGTPCSQCPLGYSCENSLCEPMRNPEK+MSLTESGESVPQIQEEAEPK+QTMVDLHNQYR+SMDEEASK+TLALQSSWTGAENPEK+WDDELAAFAK	2	IPI00876156;
IPI00113617	.	23 kda protein.	22976	.	0.99	2	FGPYYTEPVIAGLDPK	2	IPI00314467;
IPI00113659	Ifi30	interferon gamma inducible protein 30.	27784	.	1	11	AATASLSQASSEGTTTCK+LNMVEACLLDK+VSLYYESLCGACR	1	.
IPI00113703	Chga	chromogranin-a.	51789	P26339,	1	53	AEDQELESLSAIEAELEK+AKQEEKEEEEEEEAVAR+CVLEVISDSLSKPSPMPVSPECLETLQGDER+DDGQSDSQAVDGDGKTEASEALPSEGK+EEEEEEEAVAR+ELQDLALQGAK+ELTAEKR+GELEHSQQEEDGEEAMVGTPQGLFPQGGK+QEEKEEEEEEEAVAR+QQQQQQQQQQQEQQHSSFEDELSEVFENQSPDAK+RAEDQELESLSAIEAELEK+TEASEALPSEGK	1	.
IPI00113750	Proc	vitamin k-dependent protein c.	51818	P33587,	1	93	CACAPGYELADDHMR+IVNGTLTKQGDSPWQAILLDSKK+LACGGVLIHTSWVLTAAHCVEGTK+QGDSPWQAILLDSK+STVNFPCGK+VNNGGCLHYCLEESNGR+VNNGGCLHYCLEESNGRR+VNNGGCLHYCLEESNGRRCACAPGYELADDHMR+WIHSYIGEK	1	.
IPI00113806	Reg3g	regenerating islet-derived protein 3 gamma.	19307	O09049,	1	15	AYGSYCYALFSVSK+ENYCNLELPYVCK+GGWEWSNADVMNYINWETNPSSSSGNHCGTLSR+NWYDADMACQK+RPSGHLVSVLSGAEASFLSSMIK+SSGNSGQYVWIGLHDPTLGYEPNR	1	.
IPI00113828	Guca2b	guanylate cyclase activator 2b.	11628	O09051,	1	11	SGLLPAVCHNPALPLDLQPVCASQEAASTFK+SQLWAAVVLLLLLQSAQGVYIK+YHGFQVQLESVK	1	.
IPI00113845	Psmb1	proteasome subunit beta type-1.	26372	O09061,	1	13	AMTTGAIAAMLSTILYSRR+DVFISAAER+DVYTGDALR+ELGMGPHGSAGPVQLR+GAVYSFDPVGSYQR+HSNNKAMTTGAIAAMLSTILYSRR+LSEGFSIHTR+NMQNVEHVPLTLDR	1	.
IPI00113848	Dsc1	isoform 1a of desmocollin-1.	98954	P55849-1,	1	23	GFSILLSDGQGQEQK+HCEDYVRPYNYEGK+ILEDGTIYTTHDLLLSSEK+KLEVVLSAR+MAVACAAPGSTFSK+RGFSILLSDGQGQEQKK+SGTSVGQVTAIDK+SPSLILSSDPAFR	1	.
IPI00113863	Timp2	metalloproteinase inhibitor 2.	24328	P25785,	1	31	CPMIPCYISSPDECLWMDWVTEK+EVDSGNDIYGNPIK+EVDSGNDIYGNPIKR+FFACIK+GAAPPKQEFLDIEDP+GPDKDIEFIYTAPSSAVCGVSLDVGGK+KEYLIAGKAEGDGK+MHITLCDFIVPWDTLSITQK+SDGSCAWYR+SINGHQAK	2	IPI00649059;
IPI00113879	Il1rap	isoform 2 of interleukin-1 receptor accessory protein.	41567	Q61730-2,	1	362	CDDWGLDTMR+CPLFEHFLK+DALPPQIYSPNDR+DLEEPINFR+DSCFNSAMR+EPGEELVIPCK+ITCPNVDGYFPSSVKPSVTWYK+KPDDVTVDITINESVSYSSTEDETR+MYIEHGIHK+QIQVFEDEPAR+TQILSIK+VAFPLEVVQK+VVYEKEPGEELVIPCK	3	IPI00124823;IPI00653610;
IPI00113996	Blvrb	flavin reductase.	22197	Q923D2,	1	237	CLTTNEYDGHTTYPSHQYD+DSSRLPSEGPQPAHVVVGDVR+HDLGHFMLR+IAIFGATGR+LPSEGPQPAHVVVGDVR+LQDVTDDHIR+TGLTTLAQAVQAGYEVTVLVR+TVAGQEAVIVLLGTGNDLSPTTVMSEGTR+VVACTSAFLLWDPTK+YVAVMPPHIGDQPLTGAYTVTLDGR	1	.
IPI00114022	Igfbp5	insulin-like growth factor-binding protein 5.	30372	Q07079,	1	76	ALSMCPPSPLGCELVK+AVYLPNCDR+EHEEPTTSEMAEETYSPK+EPGCGCCMTCALAEGQSCGVYTER+GICWCVDK+HMEASLQEFK+LPGMEYVDGDFQCHAFDSSNVE+QDEEKPLHALLHGR	1	.
IPI00114065	Cfb	complement factor b (fragment).	85004	P04186,	1	1138	AEGIPEFYDYDVALVK+ALFVSEQGK+ALLDIGRDPK+ALRLPQTATCK+CLTNLIEK+CPRPQDFENGEFWPR+DFHINLFQVLPWLK+DKLKDEDLGFL+DLEIEEVLFHPK+DMEDLENVFYQMIDETK+EDYLDVYVFGVGPLVDSVNINALASK+EQLLPVK+FIQVGVISWGVVDVCR+FLCTGGVDPYADPNTCK+FLCTGGVDPYADPNTCKGDSGGPLIVHK+GDSGGPLIVHK+GGSFQLLQGGQALEYLCPSGFYPYPVQTR+GHETCMGAVVSEYFVLTAAHCFMVDDQK+HVIIIMTDGLHNMGGNPVTVIQDIR+ISVTRPLK+KAEGIPEFYDYDVALVK+KGNDYHK+LEDIVTYHCSR+LKDEDLGFL+LNQISYEDHK+LP…	1	.
IPI00114162	Fabp5	fatty acid-binding protein, epidermal.	15137	Q05816,	1	117	ELGVGLALR+FDETTADGR+KTETVCTFQDGALVQHQQWDGK+LMESHGFEEYMK+MAAMAKPDCIITCDGNNITVK+MIVECVMNNATCTR+TETVCTFQDGALVQHQQWDGK+TTVFSCNLGEK+TTVFSCNLGEKFDETTADGR	1	.
IPI00114206	F2	prothrombin (fragment).	70269	P19221,	1	1599	DNLSPPLGQCLTER+DTTEKELLDSYIDGR+EECSVPVCGQEGR+ELLDSYIDGR+ENLDRDIALLK+ETFMDCLEGR+ETWTTNINEIQPSVLQVVNLPIVERPVCK+GDACEGDSGGPFVMK+GIAPWQVMLFR+ITDNMFCAGFK+IVEGWDAEK+KPVPFSDYIHPVCLPDK+KSPQELLCGASLISDR+LKKPVPFSDYIHPVCLPDK+LVENFCR+LYQGNLAVTTLGSPCLPWNSLPAK+NPDSSTTGPWCYTTDPTVR+QTVTSLLR+REECSVPVCGQEGR+RGDACEGDSGGPFVMK+SGGSKDNLSPPLGQCLTER+SLKDTTEK+SLKDTTEKELLDSYIDGR+SPQELLCGASLISDR+TFGLGEADCGLRPLFEK+TFGLGEADC…	1	.
IPI00114242	Guca2a	guanylin.	12467	P33680,	0.86	1	LEAIAQDPNTCEICAYAACTGC+LLQPVAPQLCSSHSALPEALRPVCEKPNAEEILQR	1	.
IPI00114252	Ptgds	prostaglandin-h2 d-isomerase.	21066	O09114,	1	17	AQGLTEEDIVFLPQPDK	1	.
IPI00114254	Ttc37	tetratricopeptide repeat domain 37.	173942	.	0.97	6	AVDYVEQALGYFTR+IVYQTGYPSSIVSAAR+KSLQVASQQGNWSGK+LALLNNTQPK+LDSNNHLHWNALGVVACYR+RILELNR+SAVAASLKDK+TALKSARDAIR+TSEAESLCTQSLK	1	.
IPI00114285	Gsto1	glutathione transferase omega-1.	27498	O09131,	0.94	3	GSAPPGPVPEGQIR	1	.
IPI00114319	Sod3	extracellular superoxide dismutase [cu-zn].	27392	O09164,	1	303	EVDAAEMHAICR+GGNQASLQNGNAGR+IDRLDLVEK+LACCVVGTSSSAAWESQTK+REVDAAEMHAICR+RLACCVVGTSSSAAWESQTK+SVVVHAGEDDLGK+VGLTASLAGPHAILGR+VLEIWMELGR+VQPSATLPPDQPQITGLVLFR	1	.
IPI00114389	App	isoform app770 of amyloid beta a4 protein (fragment).	86722	P12023-1,	1	4	CLVGEFVSDALLVPDK+ETCSEKSTNLHDYGMLLPCGIDK+ISYGNDALMPSLTETK+QAKNLPK+QQLVETHMAR	3	IPI00230494;IPI00323079;
IPI00114403	Timp1	metalloproteinase inhibitor 1.	22628	P12032,	0.96	1	LESDTHCLWTDQVLVGSEDYQSR+SEEFLITGR+TYSAGCGVCTVFPCLSIPCK	1	.
IPI00114457	Tgfb1	transforming growth factor beta-1.	44310	P04202,	1	52	ALDTNYCFSSTEK+AQHLHSSR+EAVPEPPLLSR+GDLGTIHDMNRPFLLLMATPLER+GYHANFCLGPCPYIWSLDTQYSK+LHVEINGISPK+LLTPTDTPEWLSFDVTGVVR+QLYIDFR+QWLNQGDGIQGFR+SSVEQHVELYQK+TIDMELVK+VAGESADPEPEPEADYYAK+VEQLSNMIVR+VLALYNQHNPGASASPCCVPQALEPLPIVYYVGR	1	.
IPI00114671	Ptprg	receptor-type tyrosine-protein phosphatase gamma.	161243	Q05909,	1	11	ATISHVSPDSLYLFR+CTADMNITAEHSNHPDNK+DLLPASLGSYYR+DNSALDPIIHGLK+ETFLDPFILR+EVPSSGER+NNFRPQQALNDR	1	.
IPI00114894	Myh11	isoform 1 of myosin-11.	227028	O08638-1,	0.89	34	ALELDPNLYR+IAQLEEELEEEQGNMEAMSDR+KEEELQAALAR+KLEGDLK+QLLQANPILEAFGNAKTVKNDNSSR	3	IPI00227865;IPI00876408;
IPI00114909	Ephb6	isoform 1 of ephrin type-b receptor 6.	110107	O08644-1,	0.96	9	ACSSLGVSGGTCR+ASSDPPEAPCTGPPSAPR+ECGGHGEPSSGGMCRR+GDKLCQACPEGSYKALAGNVPCSPCPAR+LCQACPEGSYK+QADEPDGPDSIAAWHLK+SHSPDPAAPVCPCLQGFYR+WMVAVGGCR	3	IPI00330720;IPI00828254;
IPI00114939	Nptxr	neuronal pentraxin receptor.	52285	Q99J85,	0.96	4	AELLLLQSTAEQLR+ALPGGTDNASAASAAGGSGPQR+FLCTPLAAACPSGAEQGDAAGER+FLCTPLAAACPSGAEQGDAAGERAELLLLQSTAEQLR+RDTMADGAWDSPALLLELEDAVR	3	IPI00749947;IPI00788317;
IPI00114958	Kng1	isoform hmw of kininogen-1.	73102	O08677-1,	1	110	ATSQVVAGTK+ATSQVVAGTKYVIEFIAR+AYFPCIGCVHAISTDSPDLEPVLK+CPGRPWKPASWEDPNTETTEFSDFDLLDALS+CQALDMTEMAR+DAEEAATGECTATVGK+DAEEAATGECTATVGKR+DAETEQGPTHGHGWLHEK+DIPVDSPELK+EGNCSAQSGLAWQDCDFK+EGNCSAQSGLAWQDCDFKDAEEAATGECTATVGK+ENEFFIVTQTCK+EQEERDAETEQGPTHGHGWLHEK+ERFPSLHGDCVALPNGDDGECR+ESNTELAEDCEIK+ETKCSKESNTELAEDCEIK+EVLGHSIAQLNAENDHPFYYK+FPSLHGDCVALPNGDDGECR+GNLFMDINNK+HGHDHGHWSPR+HGLGHGHQKPHGLGHGHQLK+…	1	.
IPI00114963	Mstn	growth/differentiation factor 8.	42921	O08689,	1	27	ANYCSGECEFVFLQK+DFGLDCDEHSTESR+IPAMVVDR+MSPINMLYFNGK	1	.
IPI00114979	Stat5a	signal transducer and activator of transcription 5a.	90831	P42230,	1	27	EANNCSSPAGVLVDAMSQK+LNVHMNPPQVK+LSPPAGLFTSAR+QQLAGNGGPPEGSLDVLQSWCEK+RPMDSLDAR+VLWPQLCEALNMK	1	.
IPI00115065	Serpine2	glia-derived nexin.	44207	Q07235,	1	50	AKIEVSEDGTK+ASAATTAILIAR+DIVTVANAVFLR+FTAVAQTDLK+FTAVAQTDLKEPLK+GMIDNLLSPNLIDGALTR+LVLVNAVYFK+MEVPFAVR+MQLVLPK+QLSTVMR+SESLHVSHILQK+SYQVPMLAQLSVFR+TIDSWMNTMVPK	1	.
IPI00115157	Snca	isoform 1 of alpha-synuclein.	14485	O55042-1,	1	48	EGVLYVGSK+EGVVHGVTTVAEK+EQVTNVGGAVVTGVTAVAQK+TKEGVVHGVTTVAEK+TKEQVTNVGGAVVTGVTAVAQK+TVEGAGNIAAATGFVK	2	IPI00845803;
IPI00115477	Ccdc46	isoform 1 of coiled-coil domain-containing protein 46.	112676	Q5PR68-1,	0.88	7	KICEQSTESLNNDWEK+KLCEPSGTGAGLMGR+KLCEPSGTGAGLMGRK+KTHAAETEMTLEK+LCEPSGTGAGLMGR+LLLHMLR+LLLHMLRR+LQAQQADAALEEFK	2	IPI00874562;
IPI00115510	Inhbe	inhibin beta e chain.	39057	O08717,	1	3	TPTCEPETPLCCR+VISFATIIDK	2	IPI00880614;
IPI00115538	.	similar to thymosin beta-4.	22424	.	0.96	5	LSSFAQLAR+NPLPSKETIEQEK+QIDTNDNNQDR+TETQEKNPLPSKETIEQEK	1	.
IPI00115595	Ube3a	ubiquitin-protein ligase e3a.	101176	O08759,	0.92	11	MGDSSQGDNNVQK+NLVNDDDAIVAASNCLK+RLFLLFTTGTDR	1	.
IPI00115645	Dot1l	histone h3 methyltransferase dot1 variant a.	165913	.	0.94	36	ASAGTPSLSTGVSPKR+ASLPHGSR+EISAHNQQLR+GDCVQSHGQDSR+HCLELQISIVELEK+HLSQDHTGASK+IQYLQFLAYTK+LPVSIPLASVVLPSR+SFESMQR	1	.
IPI00115658	Igf1	isoform igf-ia of insulin-like growth factor i.	17093	P05017-1,	1	33	APQTGIVDECCFR+GFYFNKPTGYGSSIR+LEMYCAPLKPTK+RLEMYCAPLKPTK	6	IPI00228152;IPI00875080;IPI00881515;IPI00881859;IPI00895475;
IPI00115680	Prkcsh	isoform 1 of glucosidase 2 subunit beta.	58793	O08795-1,	0.9	1	ETVVTSTTEPSR+LVSQKPK	2	IPI00122353;
IPI00115687	Mzf1	myeloid zinc finger protein-2.	91668	.	0.95	14	DCGQGFVR+QHANLTQHRR+SQSHPRSGTGAMRGGR	2	IPI00400299;
IPI00115690	Fcna	ficolin-1.	36298	O70165,	1	208	ELGDTLCQR+GEPGTMGPPGVK+GFGNLGTEFWLGNDYLHLLTANGNQELR+LTLGQFLEGTAGDSLTK+MGPAGSKGEPGTMGPPGVK+RVDGSIDFFR+VDGSIDFFR+VDLQDFQGK+VVVIQSCPGFPGPPGPKGEPGSPAGRGER+YLSGSHESYADGINWGTGQGHHYSYK+YSSFQVSEEQEK	1	.
IPI00115793	Dsg2	desmoglein-2.	122397	O55111,	0.95	1	CALLLLVQLLAVVCLDFGNGLHLEVFSPR+GITEPPFGIFVFDR	4	IPI00850026;IPI00877308;IPI00886084;
IPI00115860	Pcdh12	protocadherin-12.	128674	O55134,	0.96	2	FQVTEEVPSGTVIGK+GESGPHQILR+LASTFVSEMSSLLEMLLGQHTVPVEAASAALRR+MMLLLPFLLGLLGPGSYLFISGDCQEVATVMVK+SLDYEQMAGFEFQVIAEDR+TNGNTYMLLTNATLDR	1	.
IPI00115866	Hagh	hydroxyacylglutathione hydrolase.	34103	Q99KB8,	1	15	ALLEVLGR+FYEGTADEMYK+KNLTVQQDIMK+LTTVLTTHHHWDHAGGNEK+TVQQHAGETDPVTTMR+VYCGHEYTVNNLK	1	.
IPI00115941	Lcn2	neutrophil gelatinase-associated lipocalin.	22875	P11672,	1	23	AGQFTLGNMHR+DDNIIFSVPTDQCIDN+SLGLKDDNIIFSVPTDQCIDN+WYVVGLAGNAVQK+YPQVQSYNVQVATTDYNQFAMVFFR	1	.
IPI00115973	Cfp	properdin.	50327	P11680,	1	223	CGGHCPGEAQQSQACDTQK+HCYNIHNCIMK+HGGPFCAGDATR+KFNGKPCAGK+LCTPLLPK+MSINCEGTPGQQSR+RSCLHVPVCKDPEEK+SCLHVPVCK+SCLHVPVCKDPEEK+SCSAPAPSHQPPGKPCSGPAYEHK+TCDHPAPR+VCDNPAPK+VEDCCLNAAYAFQEHDGGLCQACR+YPPTVSMVEGQGEK	1	.
IPI00116031	Rbm10	isoform 1 of rna-binding protein 10.	103494	Q99KG3-1,	0.82	11	DMASNEGSR+ESATADAGYAILEKK+HQQLSGLHK+LDQQALPLGGR+RESATADAGYAILEK+YGIPEPPEPKR	4	IPI00468834;IPI00776254;IPI00875654;
IPI00116105	Serpina6	corticosteroid-binding globulin.	44769	Q06770,	1	613	AGEQINNHVK+AMLQLDEGNVLPAATNGPPVHLPSESFTLK+DLAPTNVDFAFNLYK+DTPLTLTVLHK+FSMSDTYDLQDVLADVGIK+GSTQYLENLGFNMSK+HYYESEALTIPSK+HYYESEALTIPSKDWTK+IEHVVSDLDSSATLILINYIFLK+LKDSFLADTK+LPFSPENTR+LVALNSDKNTLISPVSISMALAMLSLSTR+NTLISPVSISMALAMLSLSTR+QMNLYIPK+YNRPFIFLAFDK+YNRPFIFLAFDKYTWSSLMMSQVMNPA+YTWSSLMMSQVMNPA	1	.
IPI00116120	Pdcd5	programmed cell death protein 5.	14535	P56812,	1	25	AVENYLIQMAR+LSNLALVKPEK+NSILAQVLDQSAR+VSEQGLIEILEK	2	IPI00885252;
IPI00116222	Hibadh	3-hydroxyisobutyrate dehydrogenase, mitochondrial.	35440	Q99L13,	0.98	1	DFSSVFQYLR+EAGEQVASSPAEVAEK+ICNNMLLAISMIGTAEAMNLGIR+MGAVFMDAPVSGGVGAAR+RRPVGSLAAVCSR+SMASKTPVGFIGLGNMGNPMAKNLMK+TPVGFIGLGNMGNPMAK	1	.
IPI00116228	Ppif	peptidyl-prolyl cis-trans isomerase, mitochondrial.	21737	Q99KR7,	0.92	1	FPDENFTLK+IVITDCGQLS	1	.
IPI00116264	Cxcl5	c-x-c motif chemokine 5.	14190	P50228,	1	4	CVCLTVTPK+EVCLDPEAPVIK+EVCLDPEAPVIKK+LIANLEVIPAGPQCPTVEVIAK	2	IPI00788344;
IPI00116277	Cct4	t-complex protein 1 subunit delta.	58066	P80315,	0.96	1	AFADAMEVIPSTLAENAGLNPISTVTELR+DALSDLALHFLNK+GIHPTIISESFQKALEKGLEILTDMSRPVQLSDR+KGGISNILEEMVVQPLLVSVSALTLATETVR+LFKITGCTSPGKTVTIVVR+MPENVASRSGAPTAGPGSR+QMQVLHPAAR+SILRDALSDLALHFLNK+VIDPATATSVDLR	1	.
IPI00116284	Sf1	isoform cw17 of splicing factor 1.	70408	Q64213-1,	1	3	VMIPQDEYPEINFVGLLIGPR	6	IPI00387376;IPI00830797;IPI00830819;IPI00856488;IPI00856617;
IPI00116308	St13	hsc70-interacting protein.	41656	Q99L47,	1	5	AIDLFTDAIK+GAAIEALNDGELQK+LLGHWEEAAHDLALACK+QDPSVLHTEEMR	1	.
IPI00116310	Dnahc2	dynein, axonemal, heavy chain 2.	512308	P0C6F1,	0.82	6	CMDLSSISK+DMFLMAAMGPPGGGR+DSLVINIAAGK+FIEPPVLNMK+FYFLSNDDLLEILGQSR+ITATEVTEQLETSETTEINIDLAREAYRPCAQR+KIGAYCAQPDFQPDIIGR+KIQAQISSGMTNNASLLQNYLK+KLNWALKGASAFFITECR+MGCFQTLQTEAMESMAHGLFR+NMEGNQGLK+NMEGNQGLKIIDLQMHDYLR+NTSWHEDYNK+QCEEYLVIIVQQKR+QLGEQNFIK+SKIEQFKR+VEQFETWASR+VEVMSLELEDAK+WIKNMEGNQGLK+WILFDGPVDTLWIESMNSVMDDNK	1	.
IPI00116377	Pkd1	polycystin 1.	466577	.	1	10	AYNLSSALMR+DVTYTPVAAGLLEIHVR+EHQVHVVQSEATTCR+EPAQVVHPLCPLDTEIFPGNGHCYR+FEGMDPLPSR+GCGPCPLPCFCGPAPDAACR+LALPVGHYCFVFVVSFGDTPLAR+LAQLGIADR+LEEPAQMR+LHPDEDDTLVESPAVTPVSER+LKEGDHTVEIVAQNGASQANLSLR+LLVYMLFLLVTLLANYGDASCHGHAYR+NSLDIFQIATPHSLGSVWK+SSPVVLPPSSGSEASHPSTSSSQPDGPSASLSR	1	.
IPI00116489	Nppa	atrial natriuretic factor.	16645	P05125,	0.97	13	NLLDHLEEK+SPWDPSDR	2	IPI00553811;
IPI00116498	Ywhaz	14-3-3 protein zeta/delta.	27771	P63101,	1	12	DICNDVLSLLEK+DSTLIMQLLR+FLIPNASQPESK+GIVDQSQQAYQEAFEISK+NLLSVAYK+SVTEQGAELSNEER+TAFDEAIAELDTLSEESYK+YLAEVAAGDDK	1	.
IPI00116649	Cnn2	calponin-2.	33156	Q08093,	1	4	CASQVGMTAPGTR+GLQSGVDIGVK+GPSYGLSAEVK+LQPGSVPK+NHILPPMDHCTISLQMGTNK	1	.
IPI00116670	Otog	otogelin.	313620	O55225-1,	0.96	16	AFIYNECIACCPASCQSR+CLLLLSCFCLLR+DLAACCGSCR+EEGAASLLTTSHPPGFSSSLPSSLQMPTSGIVSGATETTK+NVSCLFTFPNGTTSLFLPGASWIADCAR+TTVHVQAGPQWQGQLVGLCGNFDLK+YDACASPCFQTCR+YTFPATCQYILAK+YVQQPCVALTVYVAMCHK	1	.
IPI00116705	Fabp4	fatty acid-binding protein, adipocyte.	14650	P04117,	1	100	DGDKLVVECVMK+EVGVGFATR+LGVEFDEITADDR+LGVEFDEITADDRK+LVSSENFDDYMK+LVSSENFDDYMKEVGVGFATRK+LVVECVMK+SIITLDGGALVQVQK+VAGMAKPNMIISVNGDLVTIR	1	.
IPI00116718	.	similar to loc446231 protein.	17931	.	1	25	ADLAEEYSK+ELEEIRK+GQVCLPVISAENWK+IEINFPAEYPFKPPK+IYHPNIDEK+NIQVDEANLLTWQGLIVPDNPPYDK+TDQVIQSLIALVNDPQPEHPLR	1	.
IPI00116744	B3gat3	galactosylgalactosylxylosylprotein 3-beta-glucuronosyltransferase 3.	37067	P58158,	0.91	37	FEGPQVQDGR+LSQTLSLVPR+RPPPVPAQPPEPEALPTIYVITPTYAR	1	.
IPI00116752	Sec23ip	sec23-interacting protein.	110780	Q6NZC7,	0.99	107	KESPELSK+KIANFVK+LLQTHFKK+VSVAGHSLGSLILFDILSNQR	1	.
IPI00116753	Etfa	electron transfer flavoprotein subunit alpha, mitochondrial.	35009	Q99LC5,	1	18	AAVDAGFVPNDMQVGQTGK+GTSFEAAATSGGSASSEK+LGGEVSCLVAGTK+LLYDLADQLHAAVGASR+LNVAPVSDIIEIK+QFSYTHICAGASAFGK+SDRPELTGAK+TIYAGNALCTVK+VVQDLCK	1	.
IPI00116945	Cfd	isoform 1 of complement factor d.	28057	P03953-1,	1	2068	DTCRGDSGSPLVCGDAVEGVVTWGSR+EVEPGTLCDVAGWGVVTHAGR+GDSGSPLVCGDAVEGVVTWGSR+KPGVYTR+MWIENITNGNMTS+RPDVLHQLR+TYHDGVVTINMMCAESNR+TYHDGVVTINMMCAESNRR+WYDVQSVVPHPGSRPDSLEDDLILFK	2	IPI00224671;
IPI00117011	Hcls1	hematopoietic lineage cell-specific protein.	54212	P49710,	0.96	1	SAVGHEYVADVEK	1	.
IPI00117167	Gsn	isoform 1 of gelsolin.	85942	P13020-1,	1	2042	AGKEPGLQIWR+AQVHVSEEGGEPEAMLQVLGPKPALPEGTEDTAK+ATEVPVSWDSFNNGDCFILDLGNNIYQWCGSGSNK+DGGQTAPASIR+DPDQTDGPGLGYLSSHIANVER+DSQEEEKTEALTSAK+EPAHLMSLFGGKPMIIYK+EPGLQIWR+EVQGFESSTFSGYFK+FDLVPVPPNLYGDFFTGDAYVILK+FVIEEVPGELMQEDLATDDVMLLDTWDQVFVWVGK+HVVPNEVVVQR+IEGSNKVPVDPATYGQFYGGDSYIILYNYR+KGGVASGFK+LFACSNR+MDAHPPR+NWRDPDQTDGPGLGYLSSHIANVER+QANMEER+QGFEPPSFVGWFLGWDDNYWSVDPLDR+QTQVSVLPEGGETPLFK+RTPITVVR+SE…	1	.
IPI00117264	Park7	protein dj-1.	20021	Q99LX0,	1	28	DVMICPDTSLEDAK+GAEEMETVIPVDVMR+GLIAAICAGPTALLAHEVGFGCK+GPGTSFEFALAIVEALVGK+KGLIAAICAGPTALLAHEVGFGCK+MMNGSHYSYSESR+TQGPYDVVVLPGGNLGAQNLSESPMVK+VTVAGLAGK+VTVAGLAGKDPVQCSR	2	IPI00895414;
IPI00117281	Gpx4	isoform mitochondrial of phospholipid hydroperoxide glutathioneperoxidase, mitochondrial.	22182	O70325-1,	1	14	ILAFPCNQFGR+SMHEFSAKDIDGHMVCLDK+YGPMEEPQVIEK	2	IPI00660262;
IPI00117288	Hnrnpab	heterogeneous nuclear ribonucleoprotein a/b.	30831	Q99020,	1	17	EVYQQQQYGSGGR+EYFGQFGEIEAIELPIDPK+FGEVVDCTIK+IFVGGLNPEATEEK	3	IPI00277066;IPI00648228;
IPI00117312	Got2	aspartate aminotransferase, mitochondrial.	47411	P05202,	1	47	ASAELALGENNEVLK+DAGMQLQGYR+DDNGKPYVLPSVR+EFSVYMTK+FVTVQTISGTGALR+IAATILTSPDLR+IAATILTSPDLRK+KAEAQIAAK+MNLGVGAYR+MNLGVGAYRDDNGKPYVLPSVR+TCGFDFSGALEDISK	1	.
IPI00117315	Ela2a	elastase-2a.	28914	P05208,	1	15	NIQTACLPPAGTILPR+SSMVCAGGDGVTSSCNGDSGGPLNCR+VLLGAHSLSNPGAGSAAVQVSK	1	.
IPI00117630	Itpr1	isoform 7 of inositol 1,4,5-trisphosphate receptor type 1.	308659	P11881-7,	0.99	17	AFTTFRR+AYMQGEVEFEDGENGEDGAASPR+DLQNFLR+EADPDDHYQSGEGTQATTDK+EDIMVMDTK+EDIMVMDTKLK+EHTCETLLMCIVTVLSHGLR+ESLTSFGNGPLSPGGPSKPGGGGGGPGSSSTSR+GGGFLPMTPMAAAPEGNVK+GQGPDEPMDGASGENEHKKTEEGTSKPLK+LIFSVGLQPTLFLLGAFNVCNK+LLQAPFTDCGDGPMLR+NMGAHAVVLELLQIPYEK+QLLEENEEK+RESLTSFGNGPLSPGGPSKPGGGGGGPGSSSTSR+SEDLFNEMNWQKK	8	IPI00230018;IPI00230019;IPI00230020;IPI00230021;IPI00230023;IPI00469221;IPI00474081;
IPI00117689	Ptrf	polymerase i and transcript release factor.	43954	O54724,	0.95	2	ATEMVEVGPEDDEVGAER+IIGAVDQIQLTQAQLEER	1	.
IPI00117754	Sdf4	45 kda calcium-binding protein.	42064	Q61112,	1	25	DFHQEVFLGK+VDVNTDR	2	IPI00653769;
IPI00117803	Astn1	isoform 2 of astrotactin-1.	143950	Q61137-2,	1	15	DNIIATSPVDSNHQQATLLSHTSSSQR+ECMNGGEDFASQVTR+ILHISVMGGMIALLLSILCLVMILYTR+KLDSTGCVCPSGLSPMK+QLTTISLIIR+SGMDLTPGSDNAK+SITVSALPFLR+VLTFPEYIASLSDSGTKRMAAGVR	2	IPI00620601;
IPI00117831	Cp	ceruloplasmin.	121151	Q61147,	1	1434	ADDKVLPGQQYVYVLHANEPSPGEGDSNCVTR+AEDEHLGILGPPIHANVGDK+AGLQAFFQVR+ALYFEYTDGTFSK+DCNKPSPEDNIQDR+DIASGLIGPLILCK+DIASGLIGPLILCKK+DIFTGLIGPMK+DLYSGLIGPLIVCR+DNEDFQESNR+DNEEFLESNK+DTANLFPHK+DVDKEFYLFPTVFDENESLLLDDNIR+EDSACIPWAYYSTVDR+EEFFIGSK+EFYLFPTVFDENESLLLDDNIR+EMGPTYADPVCLSK+ETFTYEWTVPK+EYEGAVYPDNTTDFQR+EYTDGSFTNR+EYTDGSFTNRK+GPDEEHLGILGPVIWAEVGDTIK+GQHPLSIQPMGVSFTAENEGTYYGPPGR+GTFDVECLTTDHYTGGMK+…	2	IPI00605187;
IPI00117842	Man2b2	epididymis-specific alpha-mannosidase.	115610	O54782,	0.96	1	ELVAPRANTLK+FIAVEQEFFR+LAHPSLAGELLCQR+LMVSIALGGPPGSGTGAPK+NMYTEHLR+RLVPVMNDCYILLFDQDTNMLHSIQDRQSNR	1	.
IPI00117910	Prdx2	peroxiredoxin-2.	21779	Q61171,	1	272	EGGLGPLNIPLLADVTK+GLFIIDAK+KEGGLGPLNIPLLADVTK+LGCEVLGVSVDSQFTHLAWINTPR+LVQAFQYTDEHGEVCPAGWKPGSDTIKPNVDDSK+NDEGIAYR+QITVNDLPVGR+SAPDFTATAVVDGAFK+SLSQNYGVLK	1	.
IPI00117914	Arg1	arginase-1.	36260	Q61176,	1	72	ANEELAGVVAEVQK+DHGDLAFVDVPNDSSFQIVK+DIVYIGLR+DVDPGEHYIIK+EGLYITEEIYK+EGNHKPGTDYLKPPK+FPDVPGFSWVTPCISAK+GKFPDVPGFSWVTPCISAK+RPIHLSFDVDGLDPAFTPATGTPVLGGLSYR+SLEIIGAPFSK+STVNTAVALTLACFGTQR+TGLLSGLDIMEVNPTLGK+VMEETFSYLLGR+VSVVLGGDHSLAVGSISGHAR+YFSMTEVDK	1	.
IPI00117975	Sftpd	pulmonary surfactant-associated protein d.	37688	P50404,	0.99	1	AAFLSMTDVGTEGK	2	IPI00624893;
IPI00117977	Sftpb	pulmonary surfactant-associated protein b.	41728	P50405,	1	16	AICNHVGLCPR+EDAFQEAIR+FLEQECDILPLK+GVLAVAVSQVCHVVPLVVGGICQCLAER+MTKEDAFQEAIRK	1	.
IPI00117985	Mgp	matrix gla protein.	12359	P19788,	0.95	2	NANTFMSPQQR+YAMVYGYNAAYNR	1	.
IPI00118045	Msh4	muts protein homolog 4.	107006	Q99MT2,	0.96	17	GEIGMASIDLK+ISAEKPVANNTYITEGSNVLIITGPNMSGK+ISTDDDIETNSSTFMK+LQVLSPLEIIMSNTACVVGNSTK+QIALCQIMAQIGSYVPAEYASFRIAAQIFTR+TLASASRPSTEGAMADR+YAGDFPRAVGLPEK+YYCLAAAAALLK	1	.
IPI00118120	Myo5a	myosin-va.	215595	Q99104,	1	14	ETLEPLIQAAQLLQVKK+ILAGILHLGNVGFASR+QETDQLVSNLK+QGGSPMIEGVDDAK+QLELDLNDER+QLNSFHSVMCQHGMDPELIK+QMFYIVGAITLNNLLLR+QNEHCLTNFDLAEYR+RAATIVIQSYLR+RTSSIADEGTYTLDSILR+VLSLQEEIAK	3	IPI00875222;IPI00890268;
IPI00118130	Orm1	alpha-1-acid glycoprotein 1.	23895	Q60590,	1	1570	AVTHVGMDESEIIFVDWK+AVTHVGMDESEIIFVDWKK+ETKKDPEEGQA+HGAFMLAFDLK+HGAFMLAFDLKDEK+HGAFMLAFDLKDEKK+KDPEEGQA+KHGAFMLAFDLK+KHGAFMLAFDLKDEK+KQLELGK+QLELGKETK+RGLSLYAK+RPDITPELR+RPDITPELREVFQKAVTHVGMDESEIIFVDWK+WFFMGAAFR+YEGGVETFAHLIVLR+YEGGVETFAHLIVLRK	1	.
IPI00118134	Mast2	microtubule associated serine/threonine kinase 2 isoform 2.	197362	.	0.99	18	DILTFAENPFVVSMFCSFETK+DLKPDNLLITSMGHIK+EASPLEVVGTR+EDHSDGLAGLK+GPLPGKGVLQPAPSR+GRGTPQLAEEATAKAISDLAVR+KGEPANSQDTNTTVPNLLK+KLAPSRK+KQGPVLSGLVTGATLGSPR+LDEEPPGQSSR+QGPVLSGLVTGATLGSPR+SLIVTSSTSPTLPRPHSPLHGHTGNSPLDSPR	2	IPI00622008;
IPI00118168	Cd163	isoform 1 of scavenger receptor cysteine-rich type 1 protein m130.	120954	Q2VLH6-1,	0.82	10	ADDLDLLK+CGVAQSIPEGAHFGK+HNCDHAEDVGVICLEGADLSLR+LEVFYNGTWGSIGSSNMSPTTVGVVCR+MGGHRMVLLGGAGSPGCK+MVLLGGAGSPGCK+MVLLGGAGSPGCKR+QLGCPTAISAIGR+WGTVCDDNFSKDHASVICKQLGCGSAISFSGSAK+YIDIRLAGGESSCEGRVELK	3	IPI00760106;IPI00855017;
IPI00118190	Gdf7	isoform 2 of growth/differentiation factor 7.	47106	P43029-2,	0.99	48	AAAEPPPDPGPGAGSRKANLGGR+ALRAAAEPPPDPGPGAGSRK+APVAAASGHGR+GAQGSGGGGGGGGGGGGGGGGGGGGAGR+GAQGSGGGGGGGGGGGGGGGGGGGGAGRGHGR+GAQGSGGGGGGGGGGGGGGGGGGGGAGRGHGRR+QYEDMVVEACGCR+RAAGSGFR+RTALAGTRGAQGSGGGGGGGGGGGGGGGGGGGGAGR+TALAGTRGAQGSGGGGGGGGGGGGGGGGGGGGAGR	2	IPI00454190;
IPI00118304	Cep350	centrosome-associated protein 350 isoform 1.	346194	.	0.99	14	EDQSNHSTDDRSPDIQSAGGIPEQGCR+EFLSALDDQDWFDEDFGLSSSHK+ELSMPFSGGQDSFSK+ENEKPFHGEK+EVPLPNPR+FLNDGPAIDALHSSECLMK+GIALAQQESVSLAQIIK+GIASEEGSPMPSYSPR+IEHLQASSPDLSSRK+LDAEEAEIQQMEK+MKSPSPKPGGLLAQLCR+QICEMAELTR+RDLMEPTWMQPDR+RGHHDDSDEDASPDK+RQTDSSSSDIQACSQER+RSLCSSIDSVSEGPLLSEGSLSEEEER+SLLPSESHR	2	IPI00668613;
IPI00118312	Tpo	thyroid peroxidase.	101342	P35419,	0.85	6	AAEIMETSIQVMK+AYLPFATAACAPEPGTPR+EQSQFSTDALSADILGTIANLSGCLPFMLPPR+LETPAELNKAIANRSMVNK+LFVLSNVGTLDLASLNLQR+LPRASWVSIALGALLIGGLASLTWIVICRWTHADK+TLGAMAIMLVVMGTVIFLSFILR	1	.
IPI00118355	Pnliprp1	pancreatic lipase-related protein 1.	52696	Q5BKQ4,	1	5	GIIKPGATHSNEFDAK+KNALSQIVDIDGIWSGTR+QCDIFRGIIKPGATHSNEFDAKLDVGTIEK+VHLIGHSLGAHVAGEAGSR+VVGAQVAQMIDILVR	1	.
IPI00118384	Ywhae	14-3-3 protein epsilon.	29174	P62259,	1	5	AAFDDAIAELDTLSEESYK+DSTLIMQLLR+LICCDILDVLDK+NLLSVAYK+QMVETELK+YLAEFATGNDR+YLAEFATGNDRK	1	.
IPI00118413	Thbs1	thrombospondin 1.	129690	P35441,	1	546	AGTLDLSLSLPGK+AQGYSGLSVK+AQLYIDCDK+AQLYIDCDKMESAELDVPIQSIFTR+CDNCPYNHNPDQADTDK+CEGSSVQTR+CGACPPGYSGNGIQCK+CNYLGHYSDPMYR+CTSYPDGSWK+DACPINGGWGPWSPWDICSVTCGGGVQRR+DCVGDVTENQVCNK+DDFDHDNVPDIDDICPENFDISETDFR+DGIGDACDDDDDNDKIPDDR+DLQAICGLSCDELSSMVLELK+DNCQYVYNVDQR+DNTGQIFSVVSNGK+FQDLLDAVWADK+FTGSQPFGR+FVFGTTPEDILR+FYVVMWK+GDACDHDDDNDGIPDDR+GDACDHDDDNDGIPDDRDNCR+GDVNDNFQGVLQNVR+GFIFLASLR+GQDLSSPAFR+GTL…	1	.
IPI00118455	Saa1	serum amyloid a-1 protein.	13770	P05366,	1	25	DPNYYRPPGLPDK+DPNYYRPPGLPDKY+EAFQEFFGR+GNYDAAQR+GPGGVWAAEK+SGKDPNYYRPPGLPDK+SGKDPNYYRPPGLPDKY	1	.
IPI00118457	Saa2	serum amyloid a-2 protein.	13622	P05367,	1	16	DPNYYRPPGLPAK+ESFQEFFGR+GNYDAAQR+GPGGVWAAEK	1	.
IPI00118471	Avp	vasopressin-neurophysin 2-copeptin.	17900	P35455,	1	54	CAAVGICCSDESCVAEPECHDGFFR+CFGPSICCADELGCFVGTAEALR+CQEENYLPSPCQSGQKPCGSGGR+QCLPCGPGGK	1	.
IPI00118499	Uchl4	ubiquitin carboxyl-terminal hydrolase isozyme l4.	26450	P58321,	0.96	1	FLEESVSMSPEER+WLPLEANPEVTNQFLK	3	IPI00311369;IPI00405558;
IPI00118542	Col9a2	collagen alpha-2(ix) chain.	65321	Q07643,	0.99	10	EALGAAGMVGLPGPPGPPGYPGK+GDVGSQGARGPQGITGPK+GEMGHGHPGMPGPPGIPGLPGRPGQAINGK+GGVGDPGVAGLPGEK+GIPGIVGAVGQIGNTGPK+GITGPPGIDGK+GITGPPGIDGKDGTPGIPGMK+GMVGSIGAAGPPGEEGPR+GPPGEPGPPGPPGPPGVPGSDGIDGDK+GPPGEPGPPGPPGPPGVPGSDGIDGDKGPPGK+GSAGQVGRPGSPGHQGLAGVPGQPGTK	1	.
IPI00118704	Kcnh4	potassium voltage-gated channel, subfamily h (eag-related), member 4.	111481	.	0.92	11	ALEGHQEHR+DISQSGGPGLGSPGIHGDNNHENSLGR+ELRQVMGLLQAR+YSQCSAVVLTLLMSVFALLAHWMACVWYVIGRR	1	.
IPI00118737	Tfpi	isoform alpha of tissue factor pathway inhibitor.	34987	O54819-1,	1	35	AASGAERPDFCFLEEDPGLCR+FDTLEECK+FVYGGCLGNR+NNFETLDECK+NNFETLDECKK+TCIPGYEK	5	IPI00229887;IPI00404625;IPI00754020;IPI00757917;
IPI00118757	Phpt1	14 kda phosphohistidine phosphatase.	13997	Q9DAK9,	1	26	AQHSVSTEK+NGYDCECLGGGR+VHLAEPSGDPAK+WAEYHADIYDK+YPDYEVTWADDGY	1	.
IPI00118821	Pafah1b2	platelet-activating factor acetylhydrolase ib subunit beta.	25581	Q61206,	1	3	DKEPDVLFVGDSMVQLMQQYEIWR+ELFSPLHALNFGIGGDTTR	1	.
IPI00118851	1700007B13Rik	protein disulfide isomerase-like protein of the testis.	78355	Q9DAN1,	0.99	108	FHVILDSVLVFK+FLMVIFHNPSLK+KFCNSFLSK+LPENPLLK+VNVPSVQILNLSSDGR	1	.
IPI00118875	Eef1d	eukaryotic translation elongation factor 1 delta isoform a.	72930	P57776-1,	1	11	GVVQDLQQAISK+ITSLEVENQNLR+SLAGSSGPGASSGPGGDHSELIVR	3	IPI00515654;IPI00831202;
IPI00118924	Serpinf2	alpha-2-antiplasmin.	54972	Q61247,	1	395	DFFHLDER+FDPSLTQK+FTVSVDMMHAVSYPLR+GFPIKDDFLEQSER+GISEQNLVVSSVQHQSTMELSEAGVEAAAATSVAMNR+LDNQDFGDHATLK+LDNQDFGDHATLKR+LIGQNDKADFHGGK+LPLPALFK+MEEDYPQFSSPK+MSLSSFTVNRPFLFFIMEDTIGVPLFVGSVR+NPNPSALPQLQEQR+QEEDLANINQWVK+SVPTAEETR+SVPTAEETRR+TKFDPSLTQK+VLHMNTGSCLPHLLSHFYQNLGPGTIR+WFLLEQPEIQVAHFPFK	1	.
IPI00118976	Gpr27	probable g-protein coupled receptor 27.	40036	O54897,	0.98	5	ALACLPAVMLAAR+ALACLPAVMLAARR+GPTPPALVGIRPAGPGR+MANASEPGGGGSGGGAEAAALGLR+MFYAITLLFLLLWGPYVVASYLR	1	.
IPI00118994	Apoc4	apolipoprotein c-iv.	14288	Q61268,	1	234	THSLCPR+TQAWLQSSR+VLEMVEPLVTR+WQWFWGPGAVQGFMQTYYEDHLK	1	.
IPI00119019	F11	coagulation factor xi.	69789	.	1	8	CTDDAHCQFFTYATGYFPSVDHR+VPLVSNEECQTR+VQEMIIHDQYTTAESGYDIALLK	1	.
IPI00119039	Cnpy3	isoform 1 of protein canopy homolog 3.	30538	Q9DAU1-1,	1	10	ASPLPHSPPDEL+ELGGLGEDANAEEEEGVQK+NHQEEDLTEFLCANHVLK+RSGVKGSSSGSSK	2	IPI00881842;
IPI00119063	Lrp1	prolow-density lipoprotein receptor-related protein 1.	504742	Q91ZX7,	1	69	CDGEDDCGDGSDEPK+CDTEDDCGDHSDEPPDCPEFK+CELDQCWEYCHNGGTCAASPSGMPTCR+CNMFDDCGDGSDEEDCSIDPK+CNQFVDCEDASDEMNCSATDCSSYFR+DCPEVTCAPNQFQCSITK+ETGSGGWPNGLTVDYLEK+ETLVQDNIQWPTGLAVDYHNER+GGGQRACACAHGMLAEDGASCREYAGYLLYSER+IETAAMDGTLR+KLSGCSQDCEDLK+LYWISSGNHTINRCNLDGSELEVIDTMRSQLGK+LYWTDGDNISMANMDGSNHTLLFSGQK+MMPECQCPPHMTGPR+MYDAQQQQVGTNK+NLNAPVQPFEDPEHMKNVIALAFDYRAGTSPGTPNR+QGLNNAVALDFDYR+QPDVPNHPCK+QTGDVTCN…	1	.
IPI00119067	Tppp	tubulin polymerization-promoting protein.	23575	Q7TQD2,	1	5	LSLESEGANEGATAAPELSALEEAFR+LSLESEGANEGATAAPELSALEEAFRR+NVTVTDVDIVFSK+TITFEQFQEALEELAK+VDLVDESGYVPGYK	1	.
IPI00119087	Uros	uroporphyrinogen-iii synthase.	28504	P51163,	1	4	IGLDAEGAGSGNAEK+MKVLLLK+SYYEDQGIPASITFFSPSGLK	1	.
IPI00119095	Gm2a	ganglioside gm2 activator.	20824	Q60648,	1	16	IQSILSSGGKR+LSQLGGFSWDNCDEGKDPAVIK+MHRLPLLLLLGLLLAGSVAPAR+SLTIQPDPIVVPGDVVVSLEGK+TSVPLTAPQK	1	.
IPI00119138	Uqcrc2	cytochrome b-c1 complex subunit 2, mitochondrial.	48235	Q9DB77,	0.8	2	AVAQGNLSSADVQAAK+SMAASGNLGHTPFLDEL	1	.
IPI00119191	Ceacam12	adult female placenta cdna, riken full-length enriched library,clone:1600002e08 product:cea-related cell adhesion molecule 12, fullinsert sequence.	31715	.	1	17	ETMLNNGSLMIK+HPTSQLK+HVIATNSSVMGPAHSGR+MFEIARHVIATNSSVMGPAHSGR	2	IPI00776334;
IPI00119202	S100a11	protein s100-a11.	11083	P50543,	1	2	CIESLIAVFQK+TEFLSFMNTELAAFTKNQK	3	IPI00474051;IPI00874704;
IPI00119220	Snrpd2	small nuclear ribonucleoprotein sm d2.	13527	P62317,	0.94	1	MSLLNKPKSEMTPEELQK+REEEEFNTGPLSVLTQSVK	1	.
IPI00119299	Lifr	isoform 1 of leukemia inhibitory factor receptor.	122574	P42703-1,	1	5	CTTNNMR+DRFHSCHPLETTNVK+DVSLIPETPEILDLSADFFTSSLLLK+EIICSWNPGR+EWSDWSPLK+EWSSDGK+FHSCHPLETTNVK+GAEDSTYHVAVDK+HDPNMTCDYVIK+HLTTEATPSKGPDTWR+IASMEIPNDDITVEQAVGLGNR+IFLTWR+INLLCQIEICK+IPALSPGDHEVTINYLNGFQSK+ITGLVGPR+LNPYTAYTFR+LPISPAVEDTAAEDEEGK+LSCETHDLKEIICSWNPGR+NDYIISVVAR+NLIVYWKPLPINEANGK+NPLGQAQSAVVINVTER+NSAGSSPPSK+NTETNVFPQDK+NTEYTLFESISGK+SEPCLLDWR+SLEPHHSDIK+TEPVALVLLNTMLSGK+VWDCTWPAPLGVSPG…	1	.
IPI00119478	Tmod3	tropomodulin-3.	39503	Q9JHJ0,	0.99	3	DDYVPYTGEKK+FGYQFTQQGPR+LVEVNLNNIK	1	.
IPI00119522	Cpn2	carboxypeptidase n subunit 2.	62890	Q9DBB9,	1	338	AAHSQCAYSNPEGTVLLACEESR+ALGLDEGEPAGSWDLTVEGR+EVFCSDEQLADIPPDIPPHITDIVFVETAFTTVR+GAFQSLTGLQMLK+GQLVPNLK+HLEPDAFGGLPR+LAGLPEDLFCHMDILESLQLQGNQLR+LQLLNLSR+LSNNMLAR+LTLDFDR+LVSLTLSHNAITDLPEHVFR+LYNNQISNTHTFCAGPAYLK+NLEQLVK+QEQLICPVNPGHLSFR+TLNLAQNLLTQLPK+VTVSIEAPAAGP+VVFLNTQVR+WLNIQLSSR+WLNIQLSSRDGSDSAAMVYNSSQEWGLRSSCGLLR	1	.
IPI00119612	Il2rg	cytokine receptor common gamma chain.	42241	P34902,	1	10	FSLPSVDELKR+LNLQNLVIPR+SWTELIVNHEPR+VLMSSANEDIK+YNPICGSSQQWSK	1	.
IPI00119627	Irs1	insulin receptor substrate 1.	130723	P35569,	0.95	11	AGNTVPFGAGAAVGGSGGGGGGGSEDVKR+AHHDGAGGGCGGSCSGSSGVGEAGEDLSYDTGPGPAFK+CPPQLHPAPR+EETGSEEYMNMDLGPGRR+ESAPVCGAAGGLEK+SAVTGPGEFWMQVDDSVVAQNMHETILEAMR+SSASVSGSPSDGGFISSDEYGSSPCDFR+SVTPDSLGHTPPAR+YIPGANLGTSPALPGDEAAGAADLDNR	2	IPI00605223;
IPI00119676	Apoc1	apolipoprotein c-i.	9696	P34928,	1	219	AWFSEAFGK+EFGNTLEDK+LKEFGNTLEDK+QKEILTK	1	.
IPI00119696	Tax1bp3	tax1-binding protein 3.	13723	Q9DBG9,	1	2	IMQVNGWDMTMVTHDQAR+VSEGGPAEIAGLQIGDK	2	IPI00665510;
IPI00119787	Lrp1b	low density lipoprotein-related protein 1b.	517034	Q9JI18,	1	57	AIVVDPVNGWMYWTDWK+CADGTCIPR+CDTVDDCGDGSDEPDDCPEFK+CNSTSLCVLPSWICDGSNDCGDYSDELKCPVQNK+CPLNHIACHGSSACVHLSK+DCEDGSDEK+DCPDGSDELSSAGCAPNNTCDENAFMCHNK+DDCGDGSDETNCHINECLSKK+DFLCSNGDCVSSR+EAQQGSNSCQVNNGGCSQLCLPTSETTR+EPVGLSIDYVENK+INNGGCGTLCLAIPAGR+KTLLEGGMSHPR+LPAAAARPR+QPQAPNPCAANEGR+RWLCDGANDCGSNEDESNQTCTAR+SIHLSDETNLNSPVRPYENPNYFK+VPPNSLQHR+WLCDGANDCGSNEDESNQTCTAR+YIGGGSSAFK+YPCANDTSVCLQPEK	1	.
IPI00119807	Mapbpip	mitogen-activated protein-binding protein-interacting protein.	13480	Q9JHS3,	0.93	1	AQALVQYLEEPLTQVAAS+ETVGFGMLK	2	IPI00880575;
IPI00119818	Itih4	adult male liver cdna, riken full-length enriched library,clone:1300004a21 product:inter alpha-trypsin inhibitor, heavy chain 4,full insert sequence.	100323	.	1	68	ADAVQEATFQVELPR+AHGGTNINNAVLLAVELLDR+DIVWEPPVEPDNTK+DIVWEPPVEPDNTKR+DLSPQDQFNLIEFSGEANQWK+FAHTVVTSR+FEVSVNVAPGSK+FKPTLSQQQK+GELGQFYR+GSEMVVAGK+ILKDLSPQDQFNLIEFSGEANQWK+ITFELIYQELLQR+KTLFSVLPGLK+LGMYELLLK+LPLAAQAHPFRPPVR+LQDQGPDVLLAK+LSYQEGFPGAEISCWTVEI+LWALLTIQQQLEQR+MALDNGGLAR+MLSLPSVAQYPADPHLVVTEK+MTMNMMGLLQLSGPDK+NGIDIYSLTVDSR+NVIFVIDK+QSLVQATEENLNK+RLGMYELLLK+SDSGGSIQIEEGYFVHHFAPENLPTMSK+SNQA…	1	.
IPI00119871	Ank1	isoform br2 of ankyrin-1.	202549	Q02357-2,	1	13	EASQACMTKK+EGHVDTALALLEK+ELLDFVPK+IGHTGMVK+IITTDFPLYFVIMSRLCQDYDTIGPEGGSLRSK+ITTIQGPEPGALQEYEQVLVSTR+MENLYTALRNIDRSEIVNMLEGSGR+SEIVNMLEGSGR	9	IPI00127163;IPI00474771;IPI00755019;IPI00755395;IPI00755993;IPI00874807;IPI00881427;IPI00882025;
IPI00119876	Dync1h1	cytoplasmic dynein 1 heavy chain 1.	532025	Q9JHU4,	1	44	AELGEYIR+AISKDHLYGTLDPNTR+EAAEVTRK+EDEGEEAASPMLQIQR+EFGPVVIDYGK+EIVLSAGSTPK+ETVDQVEELR+FLSDPQVHTVLVER+FNYGFEYLGVQDK+FQSISTEFLALMKK+LLLIQAFRPDR+LVQTPLTDR+NLHVVFTMNPSSEGLK+NTISLLVAGLKK+QNISPDK+QTDVLQQLSIQMANAK+SVLVSAGNVK+TSAPITCELLNK+VAAPDVVVPTLDTVR	1	.
IPI00119913	Apc	isoform 1 of adenomatous polyposis coli protein.	311089	Q61315-1,	0.86	4	AAMEEQLGTCQDMEK+EFNLDSNFPGVK+EGSVSSRSGECSPVPMGSFPR+ENNCLQTLLQHLK+FQPHFGQQECVSPYR+GLNQMSNGNGSNK+GTKPAGKSELSPITRQTSQISGSNK+HAMNELGGLQAIAELLQVDCEMYGLTNDHYSVTLR+IMDQVQQASSTSSGANK+MSSTKSSGSESDSSERPALVR+MSYTSPGR+NDSLSSLDFDDDDVDLSREK+NSSLSSLSIDSEDDLLQECISSAMPKK+QPLPTNMPSISR+RSSNDSLNSVTSSDGYGKR+SHSLTIVSNACGTLWNLSAR+SSGSESDSSERPALVR+TDITESSGAQSPK+YAGMALTNLTFGDVANKATLCSMKGCMR	4	IPI00229891;IPI00229894;IPI00468234;
IPI00119945	Nit2	nitrilase homolog 2.	30502	Q9JHW2,	1	24	AGTEETILYSDIDLK+AVDNQVYVATASPAR+ESSIYLIGGSIPEEDAGK+FAELAQIYAQR+GCQLLVYPGAFNLTTGPAHWELLQR+ITFQESK+LALIQLQVSSIKSDNLTR+LYNTCSVFGPDGSLLVK+RADLYTVESK+TLSPGDSFSTFDTPYCK	1	.
IPI00120045	Hspe1-rs1	cpn10-like protein.	10978	.	1	9	GGIMLPEK+VLLPEYGGTK+VLQATVVAVGSGGK+VVLDDKDYFLFR	2	IPI00263863;
IPI00120046	Xrn2	isoform 1 of 5'-3' exoribonuclease 2.	108687	Q9DBR1-1,	0.82	8	EGMEAAVEK+FDSNCITPGTEFMDNLAK+FDVDAADEK+NSLGGDVLFVGKLHPLR+RLLYMAIDGVAPR+RNSLGGDVLFVGK	2	IPI00283057;
IPI00120051	Lgals3	beta-galactoside-binding lectin (fragment).	15914	.	0.93	1	GNDVAFHFNPR+QSAFPFESGKPFK+RGNDVAFHFNPR	4	IPI00131259;IPI00224486;IPI00890027;
IPI00120113	Cmpk2	ump-cmp kinase 2, mitochondrial.	50036	Q3U5Q7,	0.81	7	FQVIAIEGLDATGK+MENPSCHLVDASPSR+VLELIQSSGR	2	IPI00624449;
IPI00120192	C2	isoform long of complement c2 (fragment).	84726	P21180-1,	1	30	ALQQIFEHMLDVSK+CLAPSSFENGIYFPR+CQSNGQWLTPR+CSSSNMVLTGSAER+DHETELLSQQK+GESGGAVFLGRR+NIFPSLTNVSEVVTDQFLCSGMEEEDDNPCK+QGISEFYADDIALLK+QHLDGVLDFLPL+SQDVTEVITSLDSASYK+TGLNFDLGDK+TIMSILSER+TPWQVTFKPK	2	IPI00222163;
IPI00120271	Sycn	syncollin.	14595	Q8VCK7,	1	10	CEITVWSLPGK+GIFGDWSDSISALYCK+LEEYRK	2	IPI00875347;
IPI00120451	Fabp1	fatty acid-binding protein, liver.	14246	P12710,	1	362	AIGLPEDLIQK+GVSEIVHEGK+GVSEIVHEGKK+IKLTITYGPK+LTITYGPK+NEFTLGEECELETMTGEK+SVTELNGDTITNTMTLGDIVYK+SVTELNGDTITNTMTLGDIVYKR+VVRNEFTLGEECELETMTGEK+YQLQSQENFEPFMK	1	.
IPI00120465	Retn	resistin.	12492	Q99P87,	1	16	IDWTAAR+IKQDFNSLFPNAIK+LASCPEGTAVLSCSCGSACGSWDIR+NIGLNCWTVSSR+QDFNSLFPNAIK+VCHCQCAR	1	.
IPI00120499	Tff1	trefoil factor 1.	9670	Q08423,	1	2	INCGFPGVTAQQCTER	1	.
IPI00120848	Ogn	mimecan.	34012	Q62000,	1	10	DFADMPNLR+LSLLEELTLAENQLLR+VIHLQFNSISSLTDDTFCK	1	.
IPI00120864	Pbld	phenazine biosynthesis-like domain-containing protein 1.	32048	Q9DCG6,	1	13	AAIGDTLVQDIR+GEPGGQTAPYDFYSR+GGELDISLRPDGR+LPIFIADAFTATAFR+LQPTDSFTQSSR+RGGELDISLRPDGR+SFLESLK+TLEEDAHQQIAR+VNTEPLPAIEK	1	.
IPI00120870	Postn	isoform 2 of periostin.	90255	Q62009-2,	1	8	DQGPNVCALQQILGTKK+EGETVTEVIHGEPVIK+IIDGVPVEITEK+IQIEGDPDFR+ISTGGGETGETLQK	4	IPI00338018;IPI00339003;IPI00400421;
IPI00121013	Pea15a	isoform 1 of astrocytic phosphoprotein pea-15.	15054	Q62048-1,	0.89	1	ISEEEELDTK	2	IPI00336400;
IPI00121023	Zfp202	16 days embryo head cdna, riken full-length enriched library,clone:c130037e22 product:zinc finger protein 202, full insertsequence.	73381	.	0.93	42	THVSEEHHLCNECGR	1	.
IPI00121055	EG214403	complement factor h-related protein.	91654	.	0.83	3	CDNGFSPPSGLFWDYLR+CVATDQLEK+GQVASCAQPPEIPNGEINGAK+MGFCSMLLLSNILLTAWLSTAK+SCEFPQFK+TGEQVTFR+VEYSHGEVVGYDCKPR	1	.
IPI00121105	Hadh	hydroxyacyl-coenzyme a dehydrogenase, mitochondrial.	34464	Q61425,	1	11	FAAEHTIFASNTSSLQITNIANATTR+FILDGWHEMEPENPLFQPSPSMNNLVAQK+LGAGYPMGPFELLDYVGLDTTK+LLVPYLIEAVR+SMSSSSSASAAAK+SMSSSSSASAAAKK+TFESLVDFCK+TLSCLSTSTDAASVVHSTDLVVEAIVENLK	1	.
IPI00121120	Col5a2	collagen alpha-2(v) chain.	145018	Q3U962,	1	13	AGDQGVPGEPGAVGPLGPR+EGNPGPLGPIGPPGVR+GAHGMPGKPGPMGPLGIPGSSGFPGNPGMK+GEAGPTGPMGAMGPLGPR+GGIGEKGAEGTAGNDGAR+GGRGTQGPPGATGFPGSAGR+GMPGLPGPAGTPGK+GPQGLQGQQGGVGPAGPPGEPGEPGPMGPIGSR+LGPQGAPGK+QSGEYWIDPNQGSAEDAIK+SLSSQIETMR+SPDNKPVWYGLDMNR	1	.
IPI00121190	Egfr	epidermal growth factor receptor.	134853	Q01279,	1	249	ACGPDYYEVEEDGIR+ACGPDYYEVEEDGIRK+AVNHVCNPLCSSEGCWGPEPR+CDPSCPNGSCWGGGEENCQK+CNILEGEPR+DIVQNVFMSNMSMDLQSHPSSCPK+DTCPPLMLYNPTTYQMDVNPEGK+EISDGDVIISGNR+FQDEATCK+FSNNPILCNMDTIQWR+GPDNCIQCAHYIDGPHCVK+IICAQQCSHR+IPLENLQIIR+KVCNGIGIGEFK+LTQLGTFEDHFLSLQR+NLCYANTINWK+NLQEILIGAVR+NYDLSFLK+NYVVTDHGSCVR+SPSDCCHNQCAAGCTGPR+TIQEVAGYVLIALNTVER+VCNGIGIGEFK+YCTAISGDLHILPVAFK+YSFGATCVK	2	IPI00411099;
IPI00121209	Apoa1	apolipoprotein a-i.	30587	Q00623,	1	8155	AQSVIDKASETLTAQ+ARPALEDLR+ARPALEDLRHSLMPMLETLK+ARPALEDLRHSLMPMLETLKTK+DFANVYVDAVK+DFANVYVDAVKDSGR+DFWDNLEK+DFWDNLEKETDWVR+DFWDNLEKETDWVRQEMNK+DLEEVKQK+EDVELYR+ETDWVRQEMNK+ETDWVRQEMNKDLEEVK+HSLMPMLETLK+HSLMPMLETLKTKAQSVIDK+KWKEDVELYR+LAELKSNPTLNEYHTR+LQELQGR+LSPVAEEFR+MRTHVDSLRTQLAPHSEQMR+QEMNKDLEEVK+QEMNKDLEEVKQK+QKLQELQGR+QKVAPLGAELQESAR+QKVQPYLDEFQK+QKVQPYLDEFQKK+SNPTLNEYHTR+THVDSLR+THVDSLRTQLA…	1	.
IPI00121240	Apon	apolipoprotein n.	27965	.	1	17	HLVPSPGDMR+LMSSPELK+LPPIDLVR+SVTLPEACTYEPGWVLYDMAQVLLETANK+VVLENIGCPAEAYSLQLR	1	.
IPI00121267	Uroc1	probable urocanate hydratase.	74590	Q8VC12,	0.99	8	FCPSIEMR+LLALEFAQELR+QGWLMEVTDSLDHCIAR+TPNLSPEEEQLALR	1	.
IPI00121274	C8b	isoform 1 of complement component c8 beta chain.	66229	Q8BH35-1,	1	62	AEPLYELVTATDFAYSSTVK+CECICPGGFQGTACEVTYRK+CEGFVCAQTGR+DAMEQGDYTLSHVTACAGGSFGIGGMVYK+ELPTPELMEAWGDAVK+EMEQYWAIDR+EVEDCVTNQPCR+GGSPCSGPASETLNC+GGTSEDITALAYK+KPYNVESYTPQTK+LASGINLFTNTFEGPVLDHR+LLCNGDNDCGDQSDEANCR+QCNNPAPHK+SLPLEYSYGEYR+SVLEVAHYK	1	.
IPI00121279	Msln	mesothelin.	69423	Q61468,	1	5	ACSAFQNVSGLEYFEK+ALGGLACDLPGK+CQGVYGFQVSEADVR	1	.
IPI00121314	Hivep3	transcription factor hivep3.	253413	A2A884,	0.98	5	EAQASVTSTPGPQMGPGR+ETYTMATAPHPEAGR+FTLSSELEEER+GSYSFDDHVADPEVPSR+HPLLSSSLYSSGSHGSSQER+KTEKPHVGGQGR+NTPVFTSHPR+SASEQSPNVPHSSHMTETR+SHSMPSAACTISTHHHTFR+SMTVCEADVYEAEPGPSSISK	1	.
IPI00121319	Crip2	cysteine-rich protein 2.	22727	Q9DCT8,	0.99	1	GVNIGGAGSYIYEKPQTEAPQVTGPIEVPVVR+GVNTGAVGSYIYDKDPEGTVQP	1	.
IPI00121348	Sds	l-serine dehydratase.	34593	Q8VBT2,	0.91	10	ALGVNTVGAQTLK+ETLSAKPGAIVLSVGGGGLLCGVVQGLR+HFVCSSAGNAGMATAYAAR+LGIPATIVVPNTTPALTIERLK+LQTPLASLVVIVCGGSNISLAQLQALK+NEGATVEVVGEMLDEAIQVAK+VQLGLNGLPE	1	.
IPI00121421	Reln	isoform 1 of reelin.	387513	Q60841-1,	0.97	13	AATGYYPR+EEIWIIDDFIIDGNNLNNPVLLLDTFDFGPR+ELDFMSFLEPQIISIDLPR+GFGGPFCVPVVPLPSILK+ITYPLPESLTGNPVR+LSTVCGAVASGLALHFSGGCSR+QAITQDLDLR+VSYNVPLEAR	3	IPI00230330;IPI00230331;
IPI00121440	Etfb	electron transfer flavoprotein subunit beta.	27623	Q9DCW4,	1	4	EIDGGLETLR+EIIAVSCGPSQCQETIR+GIHVEIPGAQAESLGPLQVAR+TALAMGADR+VSVISVEEPPQR+YATLPNIMK	1	.
IPI00121490	Ssx2ip	afadin- and alpha-actinin-binding protein.	70956	Q8VC66,	0.9	14	EGCYSGCSSAFR+ESTDQKWSVQSRPSSREGCYSGCSSAFR+KEMISLLSPQK+LFSAFSGSSDPDNLIVHSRPR+QILMENAELKK+QQFLNMTNFDHQNSENVK+SHVEKLDNQASKVHSEGLNEEDVISR	2	IPI00831427;
IPI00121493	Ttc36	tetratricopeptide repeat protein 36.	20132	Q8VBW8,	1	15	AAEAGDLHTALEK+ALELQGVR+FGQAISLLPDR+LQGDVAGALEDLER+MLADMMGQLR+QLVLLNPYAALCNR+QSFVQSGLLAR	1	.
IPI00121514	Stip1	stress-induced-phosphoprotein 1.	62582	Q60864,	1	62	AAALEFLNR+ALSAGNIDDALQCYSEAIK+AMADPEVQQIMSDPAMR+DPQALSEHLK+DPQALSEHLKNPVIAQK+EKGNKALSAGNIDDALQCYSEAIK+ELDPTNMTYITNQAAVHFEK+ELIEQLQNKPSDLGTK+EPKPEPMEEDLPENKK+FMNPFNLPNLYQK+HDSPEDVK+KAAALEFLNR+KEPKPEPMEEDLPENK+KEPKPEPMEEDLPENKK+LAYINPDLALEEK+LDPQNHVLYSNR+LMDVGLIAIR+SLLSDPTYR+TYEEGLKHEANNLQLK+YKDAIHFYNK	1	.
IPI00121525	BC021614	cdna sequence bc021614.	24194	.	0.97	1	ASCLFGQIPK+FQDGELTLYQSNTILR+MLLADQGQSWK	1	.
IPI00121534	Car2	carbonic anhydrase 2.	29033	P00920,	1	310	AVQQPDGLAVLGIFLK+DFPIANGDR+EPITVSSEQMSHFR+GGPLSDSYR+IGPASQGLQK+KYAAELHLVHWNTK+LIQFHFHWGSSDGQGSEHTVNK+LIQFHFHWGSSDGQGSEHTVNKK+SIVNNGHSFNVEFDDSQDNAVLK+TLNFNEEGDAEEAMVDNWRPAQPLK+VLEALHSIK+YAAELHLVHWNTK	1	.
IPI00121554	Prap1	proline-rich acidic protein 1.	16798	Q80XD8,	1	19	ALEPLEKDNQLGPLLPEPK+DNQLGPLLPEPK+QKPAAAEEK+QVLQGPEEDLDHLAHSMEDS+RPDAMTWVETEDILSHLR	1	.
IPI00121655	Brwd1	isoform a of bromodomain and wd repeat-containing protein 1.	259026	Q921C3-1,	1	19	ADSISEEADSEPESSVLCK+ATVESNFEEELNYGLR+CHGSDHGPSSTGDPSTSGQK+EAILAPQCLSHR+ESNLQVTQKSPK+IFTGSDDCLVK+ITQRASVATDKMK+KLLHNSDDQSLK+LGVDQDGTANGLPSGEGTPRR+LPEPEHQDSAENPSQAASADLNSGGGSSFEQRK+LRADSISEEADSEPESSVLCKNTHLCK+LSLDIQSPPNIGLRR+RQCKALLILIFQCEDSEPFR+SYEELVLSNK+VTMIAWNQDDSTVVTAVNDHVLK+VVVPEAPPGMFRR+VYLSDSDNNSVETDENLK+YMVSTGADGTVCFWQWDLESLK	3	IPI00654074;IPI00750042;
IPI00121788	Prdx1	peroxiredoxin-1.	22176	P35700,	1	128	ADEGISFR+ATAVMPDGQFK+DISLSEYK+GLFIIDDK+HGEVCPAGWKPGSDTIKPDVNK+IGYPAPNFK+KQGGLGPMNIPLISDPK+LNCQVIGASVDSHFCHLAWINTPK+LVQAFQFTDK+QGGLGPMNIPLISDPK+QITINDLPVGR+QITLNDLPVGR+SKEYFSK+SVDEIIR+TIAQDYGVLK	1	.
IPI00121833	Acaa1b	3-ketoacyl-coa thiolase a, peroxisomal.	43953	Q921H8,	1	24	AEELGLPILGVLR+AEIVPVTTTVLDDK+DCLTPMGMTSENVAER+DGGSTTAGNSSQVSDGAAAVLLAR+FPQASASDVVVVHGR+IAQFLSGIPETVPLSTVNR+LKPEQLGDISVGNVLEPGAGAVMAR+LQVVLGHLAGRPESSSALQAAPCSAR+NGSYDIGMACGVESMSLSGMGNPGNISSRLLESEK+QCSSGLQAVANIAGGIR+TITVSQDEGVRPSTTMQGLAK	1	.
IPI00121837	Rnase4	ribonuclease 4.	17025	Q9JJH1,	1	31	FLRQHVDPQATGGNDNYCNVMMQRR+FNTFIHEDIWNIR+GICSTTNILCK+QHVDPQATGGNDNYCNVMMQR+RVVIACEGDPEVPVHFDR+VVIACEGDPEVPVHFDR	1	.
IPI00121851	Vbp1	prefoldin subunit 3.	22436	P61759,	1	2	LHLGIPEAVFVEDVDSFMK+NLDSLEEDLDFLR+QPGNETADTVLK	1	.
IPI00122117	F13b	adult male liver tumor cdna, riken full-length enriched library,clone:c730005g24 product:coagulation factor xiii, beta subunit, fullinsert sequence.	76195	Q07968,	1	266	CEQGAWSSPPVCLEPCTIDVDHMNR+CNEYYLLK+CPPPPVPLNSK+CTAEGWSPNPR+DAYISETSIAGSVLR+DEEVVHCLSAGWSSQPSCR+GMCASPPVIR+GMCASPPVIRNGDIVSSAARTYENGSSVEYR+HLPFILLLILSGELYAEEK+IAQYYYTFK+ILHGDLIDFVCK+LIENGYFHPVK+LSFFCLAGYATESGK+LSFQEALR+MSYGCSSGYK+QCDFPTVENGR+QGYNLSPSIPLSEISAQCNR+QTGEAECQANGWSLTPQCNK+RLSFQEALR+SFYFPMSVDK+SFYFPMSVDKK+TTGGKDEEVVHCLSAGWSSQPSCR+VACEQPPSVENGVAHPHSEIYYSGDK+VHIECELNFVIQGSEELLCENGK+WNFDNRP…	1	.
IPI00122122	C8g	complement component c8 gamma chain.	22508	Q8VCG4,	1	201	AEATTLHAAPQGAAMAVSTFR+EANLTEDQILFFPK+FLFQVSR+FLQEQGHR+GPVHMVVAETDYQSFAILYLEQGR+KLDGICWQVR+KPIGSTSPISTIQAQVNFSAQK+LDGICWQVR+QLFENTGVPGR+SLPVNDSVLDVFER+YGFCETADQLHILNEVPR	1	.
IPI00122139	Acaa1b	3-ketoacyl-coa thiolase b, peroxisomal.	43995	Q8VCH0,	0.98	1	AEELGLPILGVLR+DCLIPMGITSENVAER+DGGSTTAGNSSQVSDGAAAVLLAR+IAQFLSGIPETVPLSTVNR+QCSSGLQAVANIAGGIR+TITVSQDEGVRPSTTMQGLAK	1	.
IPI00122265	Sh3bgrl	sh3 domain-binding glutamic acid-rich-like protein.	12811	Q9JJU8,	1	33	ENNAVYAFLGLTAPPGSK+ENNAVYAFLGLTAPPGSKEAEAQANQQA+ENVPEDSRPSTGYPLPPQIFNECQYR+GDYDAFFEAR+QQDVLCFLEANK+VYIASSSGSTAIK	1	.
IPI00122272	Ecm1	isoform long of extracellular matrix protein 1.	62775	Q61508-1,	1	68	AALILACLALASAASEGAFKASDQR+AGPAVPQEAIPLQK+AWEGTLDGYCER+CCELPYPEQACCGEEEK+CCELPYPEQACCGEEEKLAFIENLCGPR+DECFAHLAPYPNYDR+DILTLDLSR+DPALCCDLSPEDK+EIDPPAQPQEEIVQK+EQPPPQVHIEQK+EVKPHTLAGQLPPEPR+EVQPPSSPEDIPVYEEDWPTFLNPNVDK+GTDANPAPGSK+GTDANPAPGSKEE+HCQQGR+LAFIENLCGPR+LDGFPPGRPSPDNLK+LETEFQR+LFQHLHEVGYAAPPSLPQTR+LRVDHSVTSLHDPPLFEEQR+LVWEDAMTQFCEAEFSVK+NICLLR+NLPATDAIQR+NSWKDPALCCDLSPEDK+NVALVAGDTGNATGLGE…	1	.
IPI00122273	Dag1	dystroglycan.	96905	Q62165,	1	21	AASSDPGEVVPSACAADEPVTVLTVILDADLTK+DPVPGKPTVTIR+EALPSWLHWDPHSHILEGLPLDTDK+GVHYISVSAAR+KLAFAFGDR+LETASPPTR+MQSFSEVELHNMK+RQIHATPTPVTAIGPPTTAIQEPPSR+SSEDDVYLHTVIPAVVVAAILLIAGIIAMICYRK+SWVQFNSNSQLMYGLPDSSHVGK+VSIPTDLIASSGEIIK	1	.
IPI00122312	Fgg	adult male liver tumor cdna, riken full-length enriched library,clone:c730002j02 product:fibrinogen, gamma polypeptide, full insertsequence.	50349	Q8VCM7,	1	1556	AIQVYYNPDQPPKPGMIDSATQK+CHAGHLNGVYHQGGTYSK+DCQEIANK+DNCCILDER+DSVQIHDTTGK+DSVQIHDTTGKDCQEIANK+EGFGHLSPTGTTEFWLGNEK+ESGLYFIRPLK+FEGNCAEQDGSGWWMNK+FFTSHNGMQFSTWDNDNDK+FGSFCPTTCGIADFLSSYQTDVDNDLR+IDGSLDFK+IDGSLDFKK+IHLISMQSTIPYALR+LSIGEGQQHHMGGSK+LTYAYFIGGDAGDAFDGYDFGDDPSDK+MVEEIVK+MVEEIVKYEALLLTHETSIR+QQFLVYCEIDGSGNGWTVLQK+RIDGSLDFK+RIDGSLDFKK+SSTTNGFDDGIIWATWK+TLEDILFR+TSTADYAMFR+VAQLEAQCQEPCK+VAQ…	1	.
IPI00122322	Sectm1a	secreted and transmembrane protein 1a.	21438	Q921W8,	0.99	2	SWDNPICTEGILSVPR	3	IPI00649915;IPI00828342;
IPI00122429	Rbp4	retinol-binding protein 4.	23206	Q00724,	1	535	DPEGLFLQDNIIAEFSVDEK+DPNGLSPETR+FSGLWYAIAK+GHMSATAK+GNDDHWIIDTDYDTFALQYSCR+KDPEGLFLQDNIIAEFSVDEK+LLSNWEVCADMVGTFTDTEDPAK+LQNLDGTCADSYSFVFSR+MKYWGVASFLQR+QEELCLER+QRQEELCLER+WIEHNGYCQSRPSR+YWGVASFLQR	2	IPI00756893;
IPI00122439	Fbn2	fibrillin-2.	313630	Q61555,	0.86	14	CICPPGYEVR+CLCYDGFMASMDMK+CMNGGTCADDHCQCQK+GFVTSTDGSR+LLCDNGLCR+LSSTGLICIDSLK+QGLCFAEVLQTMCQMASSSR+SECCCDGGRGWGHQCELCPLPGTAQYKK+TCIDVNECDLNPNICMFGECENTK+TKPGICENGR+TLCCATIGR+VMPSLCTNGQCVNTMGSFR	2	IPI00272591;
IPI00122450	Cald1	caldesmon 1.	60453	.	1	6	EFDPTITDGSLSGPSR+YEVEETEVVIK	6	IPI00311344;IPI00462119;IPI00757121;IPI00775950;IPI00775997;
IPI00122475	Camp	adult inner ear cdna, riken full-length enriched library,clone:f930015n03 product:cathelicidin antimicrobial peptide, fullinsert sequence.	20750	.	1	2	AVDDFNQQSLDTNLYR+KIGQKIK+LLDLDPEPQGDEDPDTPK	2	IPI00875797;
IPI00122568	Arhgdib	rho gdp-dissociation inhibitor 2.	22851	Q61599,	1	3	DAQPQLEEADDDLDSK+ELQEMDKDDESLTK+LSLVCDSAPGPITMDLTGDLEALKK+TLLGDVPVVADPTVPNVTVTR	1	.
IPI00122652	Pla2g7	platelet-activating factor acetylhydrolase.	49361	Q60963,	0.97	4	LQSVMSAAGSGHSK+TLQPLLFINSAK+VAIDLTNK	3	IPI00329896;IPI00626543;
IPI00122740	Macrod1	macro domain-containing protein 1.	35295	Q922B1,	0.97	1	MSLQSQVSGR+YVIHTVGPIAVGQPTASQAAELR	1	.
IPI00122815	P4hb	17 days embryo kidney cdna, riken full-length enriched library,clone:i920160l24 product:prolyl 4-hydroxylase, beta polypeptide, fullinsert sequence.	57058	.	1	19	DHENIIIAK+EADDIVNWLK+LITLEEEMTK+MDSTANEVEAVK+NNFEGEITK+QFLLAAEAIDDIPFGITSNSGVFSK+SNFEEALAAHK+TGPAATTLSDTAAAESLVDSSEVTVIGFFK+TVIDYNGER+VDATEESDLAQQYGVR+VHSFPTLK+VLVGANFEEVAFDEK+YKPESDELTAEK	2	IPI00133522;
IPI00122829	Ap4m1	ap-4 complex subunit mu-1.	49509	Q9JKC7,	0.83	11	LQPPQGELTVMR+LSVLIASNGSLLK+NFIQTEAVVSKPFSLFDLSSVGLFGAETQQNK	1	.
IPI00122845	Rsf1	remodeling and spacing factor 1.	161750	.	1	17	DGNACMEGNGTECLNSVITSTK+DISTILDEERK+IETDEESCDNAHGDADQPAR+KDVDCSR+LDNAQTSGMEDTSETKGSVQK+LEEPGLLNMDMPLEPSEK+LNDLDSDSNLDEEESEDEFK+MAAAAAAAAAAAAAAMAPPGCPGSCPNFAVVCSFLER+VGSPLDYSLVDLPSTNGQSPGK+YLIKICQEFNSTWAWEMEK	1	.
IPI00122973	Icam1	isoform 1 of intercellular adhesion molecule 1.	58844	P13597-1,	1	18	CVLELADQILETQR+KADGALLPIGVVK+LDTPDLLEVGTQQK+LFCSLEGLFPASEAR+QEMNGTYVCHAFSSHGNVTR+QPVGGHPK+SFFCSAALEVAGK+TFDLPATIPK+TQLSAVLLR	2	IPI00230702;
IPI00122977	Serping1	plasma protease c1 inhibitor.	55638	P97290,	1	443	ALNPTVFK+DFACVHQALK+FLPTYLTMPHIK+FPVFMGR+GVTSVSQIFHSPDLAIR+HETVLELTESGVEAAAASAISFGR+KLLDSLPSDTR+LLDSLPSDTR+LSEALTDFSVK+LTPLTLLLLLLAGDR+LVLLNAVYLSAK+LYHAFSATK+MMAPFFYK+SNLESILSYPK+SSQDMLSVMEK+VLGPDSAANLELINTWVAENTNHK+VPMMSSVK+YPVAQFDDHTLK	1	.
IPI00123040	Ptprk	receptor-type tyrosine-protein phosphatase kappa.	164186	P35822,	1	22	ENDTHCIDFSYLLYSQK+IAGISAGILVFILLLLVVIVIVKK+LSNPPSAGPIVVHCSAGAGR+QPAAFIVTQYPLPNTVK+RQNVVDVFHAVK+VLLTRPGEGGTGLPGPPLITR	1	.
IPI00123063	Clip1	isoform 1 of cap-gly domain-containing linker protein 1.	155814	Q922J3-1,	0.83	5	EKLENDIAEIMKMSGDNSSQLTK+EPSATPQISNLTK+GIGTDSAEFAELK+LDYQHEIESLQSK+MDQLRTMVEAADR+RVMAATPASLK+RVMAATPASLKR+SPSASSLSSMSSVASSVSSKPSR+VMAATPASLK+YFQCQPK	6	IPI00404318;IPI00761270;IPI00856800;IPI00857273;IPI00857685;
IPI00123199	Nap1l1	nucleosome assembly protein 1-like 1.	45345	P28656,	1	18	FYEEVHDLER+GIPEFWLTVFK+KYAVLYQPLFDK+LDGLVDTPTGYIESLPK+NVDLLSDMVQEHDEPILK+YAVLYQPLFDK	1	.
IPI00123223	Mug1	murinoglobulin-1.	165298	P28665,	1	1350	AFIFIDESHITHAFTWLSQK+AHFSVMGDILSSAIR+ALMAYAFALAGNQNK+ALSCLESSWK+AQELSYTSATTTDQHGLAEFSIDTTCISGSSLHIK+AVDQSVLLLKPESELSPSWIYNLPGMQQNK+DEILKSLDEEAIKENNSIHWK+DGSYSAFGDQNGER+DLFQCVSFIIPR+DPSSNDPLTETIR+EEDSCSYFYCMEER+EEHSFTVMEFVLPR+EGNTWLTAFVLK+ESGEKEEHSFTVMEFVLPR+ESVVFVQTDKPVYKPGQSVK+ETETGCR+FALEIPVEFSMVPMAK+FQVENSNR+FSTSQSLPASQTR+GDPIPNEK+GGVDDEMTLSAYITMALLESSLPATHPVVSK+GPTHEFSK+HGIPFFVK+HTNLVPHGTEK+H…	1	.
IPI00123292	Fubp1	16 days neonate thymus cdna, riken full-length enriched library,clone:a130068c19 product:far upstream element binding protein 1 (fusebinding protein 1) (fbp) homolog.	74486	.	0.99	12	AWEEYYK+GRPAPGFHHGDGPGNAVQEIMIPASK+IQFKPDDGTTPDR+KMGQAVPAPAGAPPGGQPDYSAAWAEYYR+MADYSTVPPPSSGSAGGGGGGVVNDAFK+MVMIQDGPQNTGADKPLR+SCMLTGTPESVQSAK	3	IPI00467635;IPI00874931;
IPI00123316	Tpm1	isoform 1 of tropomyosin alpha-1 chain.	32681	P58771-1,	0.96	2	ATDAEADVASLNR+IQLVEEELDR+KATDAEADVASLNRR+MEIQEIQLK+MELQEIQLK+SIDDLEDELYAQK	3	IPI00403987;IPI00404662;
IPI00123375	Jarid1d	isoform 1 of histone demethylase jarid1d.	177018	Q62240-1,	0.99	1	FLLCDGCSDNYHIFCLLPPLSEVPK+NLNHSFEPCMK	4	IPI00828782;IPI00848809;IPI00848997;
IPI00123380	Cacna1g	calcium channel, voltage-dependent, t type, alpha 1g subunit.	262833	.	0.99	18	ADSGACGPDSCPYCAR+DPSASSPLDSTAASPSPKK+EEAELEAELELEMK+KSLLPPLIIHTAATPMSLPK+MDEEEDGAGAEESGQPR+RHSIAVSCLDSGSQPRLCPSPSSLGGQPLGGPGSRPK+RLALVALGEHSELR+TSSSGSAEPGTAHHEMK	10	IPI00338092;IPI00468942;IPI00625903;IPI00648111;IPI00648377;IPI00649495;IPI00649668;IPI00649776;IPI00754757;
IPI00123390	Acsl6	acyl-coa synthetase long-chain family member 6 isoform 1.	80786	.	0.97	6	AFLVGIVVPDPEVMPSWAQK+AFLVGIVVPDPEVMPSWAQKK	6	IPI00262693;IPI00553820;IPI00625955;IPI00649775;IPI00856340;
IPI00123542	Grid1	glutamate receptor delta-1 subunit.	112244	Q61627,	0.9	4	ESVVDFSK+GLNGSLQERPMGSR+KSTKPWNGGR+KWHSMASLNCIRK+YMDYSVGILIK	2	IPI00856177;
IPI00123639	Calr	calreticulin.	47995	P14211,	1	39	DMHGDSEYNIMFGPDICGPGTK+EEDEEESPGQAKDEL+EQFLDGDAWTNR+FYALSAK+FYGDLEK+HEQNIDCGGGYVK+IDDPTDSKPEDWDKPEHIPDPDAK+IDNSQVESGSLEDDWDFLPPK+IDNSQVESGSLEDDWDFLPPKK+IKDPDAAKPEDWDER+KPEDWDEEMDGEWEPPVIQNPEYK+KVHVIFNYK+LFPSGLDQK+SGTIFDNFLITNDEAYAEEFGNETWGVTK+VHVIFNYK	1	.
IPI00123741	Map3k6	mitogen-activated protein kinase kinase kinase 6.	143055	Q9WTR2,	0.82	18	MAGPCPRAGVLERAGSCWQDPLAEALSR+MQYYWDVGFYLGAQILANDPIQVVLAAEQLYK+SRPLSVVYVLTR+VRIAIKEIPER+YAPASETPATLPKDQNLVR	1	.
IPI00123744	Cst3	cystatin-c.	15531	P21460,	1	104	ALCSFQIYSVPWK+ALDFAVSEYNK+GSNDAYHSR+KALCSFQIYSVPWK+KQLVAGVNYFLDVEMGR+MLGAPEEADANEEGVR+MLGAPEEADANEEGVRR+QLVAGVNYFLDVEMGR+RALDFAVSEYNK+SQTNLTDCPFHDQPHLMR	1	.
IPI00123746	Cdh13	cadherin-13.	78286	Q9WTR5,	1	8	DIQGSLQDIFK+ETIATYQLYVETTDASGK+INENTGSVSVTR+TPHAEDMAELVIVGGK+VNSDGTLVALR	3	IPI00458574;IPI00775975;
IPI00123783	Odz3	isoform 1 of teneurin-3.	303066	Q9WTS6-1,	0.98	21	CEEGWTGPACNQR+DALIGVYGRK+GICIMGSCACNSGYK+IAAGRPMHCQVPGVEYPVGK+LMAVNVTYSSTGQIASIQR+QDGMFDLVANGGASLTLVFER+TTTPESDLGTLR+VNVFGRK	3	IPI00798466;IPI00830643;
IPI00123821	Srgn	serglycin.	16711	P13609,	1	39	CKPNGFFANCIEEK+GPQFDLIDESNNIGPPMNNPVLMEGPSK+ILTEQNQDQPEDDFII	1	.
IPI00123831	Nptn	isoform 1 of neuroplastin.	31277	P97300-1,	1	21	AEDSGEYHCVYHFVSAPK+ESLLPVTLQCNLTSSSHTLMYSYWTR+IVTSEEVIIR+NEGQDAMMYCK+NGVELTATR	4	IPI00662285;IPI00757771;IPI00762688;
IPI00123835	Bach1	transcription regulator protein bach1.	81374	P97302,	0.9	19	EAALSPEQIQILAK+GFWSDICSTDSPCQMQLSPTVAK+IVGQTDAELTVTLPEEVTVK+KLDCIQNLESEIEK+LDCIQNLESEIEK+QSAGISDFCQQMSDK	1	.
IPI00123845	Nfatc3	isoform x1 of nuclear factor of activated t-cells, cytoplasmic 3.	115451	P97305-1,	0.95	26	TSEDQAAILPGK	7	IPI00225469;IPI00225470;IPI00556898;IPI00652264;IPI00785237;IPI00874493;
IPI00123886	Prkdc	isoform 1 of dna-dependent protein kinase catalytic subunit.	471388	P97313-1,	0.99	14	AIRPQIEMKR+ELEYCSTVNIVSENSLDLSK+ELLNPVVEFVSHPSPTCR+ETGLMCTVMVHALR+FLDALELSQSPMLFQLMTDILCR+GPVHWNCISAVVHQGLIR+IMADALSR+KHVSLNK+KPTTGHFQRR+LMESSSDNPK+MYAALGDLR+MYAALGDLRAPGLGPFR+NIQASCDQSILLGTTCR+RCYTFPIEVEVPMERK+RLSFAVPFR+STVLTPMFIETQASPSILHTQTQEGPLSDQR+VGCLASLQQPGGIR+VYELLGVLGEVHPSEMINHSENLFR	1	.
IPI00123920	Serpina1c	alpha-1-antitrypsin 1-3.	45823	Q00896,	1	3876	AVLTIDETGTEAAAVTVLLAVPYSMPPILR+DQSPASHEIATNLGDFAISLYR+FDHPFLFIIFEEHTQSPIFVGK+FDHPFLFIIFEEHTQSPLFVGK+IFNNGADLSGITEENAPLK+IFNNGADLSGITEENAPLKLSQAVHK+KLDQDTVFALANYILFK+KLDQDTVFALANYILFKGK+KPFDPENTEEAEFHVDESTTVK+KVINDFVEK+LAQIHFPR+LDQDTVFALANYILFK+LSISGEYNLK+MQHLEQTLSK+NHYQAEVFSVNFAESEEAK+NHYQAEVFSVNFAESEEAKK+RLAQIHFPR+SFQHLLQTLNRPDSELQLSTGNGLFVNNDLK+TLMSPLGITR+VINDFVEK+VINDFVEKGTQGK+WKKPFDPENTEEAEFH…	1	.
IPI00123924	Serpina1d	alpha-1-antitrypsin 1-4.	45998	Q00897,	1	1425	AVLTIDETGTEAAAATVLQVATYSMPPIVR+DQSPASHEIATNLGDFALR+FDHPFLFIIFEEHTQSPIFVGK+FDHPFLFIIFEEHTQSPLFVGK+IFNNGADLSGITEENAPLK+IFNNGADLSGITEENAPLKLSK+IFNNGADLSGITEENAPLKLSKAVHK+KLDQDTVFALANYILFK+KLDQDTVFALANYILFKGK+KVINDFVEK+LDQDTVFALANYILFK+LSISGNYNLK+MQHLEQTLNK+NHYQAEVFSVNFAESEEAK+NHYQAEVFSVNFAESEEAKK+QPFDPENTEEAEFHVDESTTVK+SFQHLLQTLNRPDSELQLSTGNGLFVNNDLK+TLMSPLGITR+VINDFVEK+VINDFVEKGTQGK+WKQPFDPENTEEAEF…	1	.
IPI00124111	Pkp1	plakophilin-1.	80896	P97350,	0.97	2	GLMSNGMSQLIGIK+LLLSDMWASK+QDPVYVPPISCNK+SPNQNVQQAAAGALR+SSQSSTLSHSNRGSMYDGLADNYNNYGTTSR	1	.
IPI00124115	S100a13	protein s100-a13.	11158	P97352,	0.85	1	TLDVNQDSELR	1	.
IPI00124120	Sacs	isoform 3 of sacsin.	520692	Q9JLC8-3,	0.97	14	AESVAEINK+DEENGAISDFSGK+ENLLDPGMAACHGPALWSFNNSEFSDSDFLNITR+EPLTVRIKNILEEYPSVSDIFK+FLASLTDTSEK+FPNQFKPFIDVFGCQLPLAVEAPYSYNGTLFR+GRPCTQLQLLNPER+IEALQVSSCQNQDVLMKK+IIQELTIFK+IVSSLDLYK+LVQLGMAK+QFHASVIDSVTK+RKQFHASVIDSVTK+RLDTSIQHPLVK+RNMDIR+SDGAELLMFLNHMEK+TVAVPATATGR+VCQFGALCSLQGR+VPGNLAAAVQLSAASATSSASPVR+YMSIAKFGTCYVLTKSIPSAEVEK	3	IPI00816925;IPI00876424;
IPI00124264	Anxa11	annexin a11.	54111	P97384,	1	2	DESTNVDMSLVQR+TPVLFDVYEIK	3	IPI00830921;IPI00877240;
IPI00124287	Pabpc1	polyadenylate-binding protein 1.	70643	P29341,	1	1	ITGMLLEIDNSELLHMLESPESLR	10	IPI00172364;IPI00331552;IPI00420950;IPI00648982;IPI00649252;IPI00653624;IPI00655207;IPI00666636;IPI00830910;
IPI00124374	Pros1	vitamin k-dependent protein s.	74934	Q08761,	1	18	DVDECSENMCAQLCVNFPGGYSCYCDGKK+KVESALIKPINPR+LGSLFKPTDGFLDTK+NGLELWTPLR+VLLACLALVIPVSETNFLSK+YLGCLGAFR	1	.
IPI00124470	C1qc	complement c1q subcomponent subunit c.	25966	Q02105,	1	161	DGHDGLQGPK+FNSVVTNPQGHYNPSTGK+GTSGLPGDPGPR+HQSVFTVTR+QTTQYPEANALVR+QVSSGGALLR+VASFCDHMFNSK	1	.
IPI00124501	1110067D22Rik	galectin-related protein a.	18956	Q8VED9,	0.8	11	GEEQSAIPYFPFIPDQPFR	1	.
IPI00124511	Rpe	ribulose-phosphate 3-epimerase.	24945	Q8VEE0,	0.97	3	IGPSILNSDLANLGAECLR	3	IPI00459757;IPI00624030;
IPI00124639	Nt5c	5'(3')-deoxyribonucleotidase, cytosolic type.	23076	Q9JM14,	0.95	3	GFLANEQYGALRPDLAEK	2	IPI00648626;
IPI00124640	Grn	osteoclast-like cell cdna, riken full-length enriched library,clone:i420031m06 product:granulin, full insert sequence.	65018	P28798,	1	456	AVCCEDHIHCCPAGFQCHTEK+AVSLPFSVVCPDAK+CDMEVSCPEGYTCCR+CVSPTGTHTLLK+DSAGVWACCPYLK+DVDFIQPPVLLTLGPK+GDTMVAGLEK+GSWACCQLPHAVCCEDR+GTCEMGILQVPWMK+GVSCGDGYHCCPQGFHCSADGK+LNTGAWGCCPFAK+LPDPQILK+QHCCPAGYTCNVK+QTTPLQIGDIGCDQHTSCPVGQTCCPSLK+SDTPCDDFTR+TQCPDDSTCCELPTGK+VGNVECGEGHFCHDNQTCCK+VHCCPHGASCDLVHTR+WDMFLR+YGCCPMPNAICCSDHLHCCPQDTVCDLIQSK	1	.
IPI00124642	Narg2	isoform 1 of nmda receptor-regulated protein 2.	109879	Q3UZ18-1,	0.83	4	EKQLFSGVEGGPEGCK+EQRTYVDLLAKYAK+ESDVGVLCTNDER+KVPELPLTNSEESK+MQDELLKPVSRK+MSSSITMSEPR+QGGQGNANNPNNTATASEAAESEK+QLFSGVEGGPEGCK	1	.
IPI00124725	Itih3	inter-alpha-trypsin inhibitor heavy chain h3.	99366	Q61704,	1	263	DHLVQATPANLK+EQGYIFGDYIER+ESPGNVQIVNGYFVHFFAPQGLPVVPK+EVSFDVELPK+FPLYNLGFGNNLNYNFLETLALENHGLAR+GHGALNDLTFTEEVDMEEMDAALK+GHVSFKPSLDQQR+GIEMLNK+GKYEMYLK+ILDDVKEDDYLNFILFSTDVTTWK+KGHVSFKPSLDQQR+LWAYLTIEQLLEK+NIHDQSMTNINDGLLK+NSYPHFYDGSEIVVAGR+SLPEGVVDGIEVYSTK+STSIIIMLTDGDANTGESRPEK+VTFELTYEELLK+YEMYLK	2	IPI00876246;
IPI00124742	Eif4h	isoform long of eukaryotic translation initiation factor 4h.	27341	Q9WUK2-1,	1	4	EALTYDGALLGDR+ELPTEPPYTAYVGNLPFNTVQGDIDAIFK	2	IPI00222560;
IPI00124840	Tff3	trefoil factor 3.	8808	Q62395,	0.8	1	VDCGYPSVTSEQCNNR	1	.
IPI00124867	Cst10	dd72 protein.	16451	.	0.8	1	LMSASQQVVAGK+QVVLGGVEPADPK	2	IPI00849871;
IPI00124959	Mki67	ki-67 protein.	324429	.	1	31	DPVTVDETTK+EEPTAQRKQPSR+EESSALTK+EHFETPNPK+ERPQSPGKQESPGITPPR+ESGELSEGSEK+ETLQTAADGTR+ETQLLVSGR+KSGNLPAK+KVDFSEDLSGLTEMFK+MASSAHLVTIKR+NIVEPTSGGSLLR+QEATDEKPVPEK+QQQMSDTGSVLSNSANLSER+RVSFGGHLRPELFDENLPPNTPLK+TLEDLPGFQELCQAPSLVMDSVIVEK+VSVPARPYK	1	.
IPI00124979	Rbmx	putative uncharacterized protein.	42301	.	1	2	GFAFVTFESPADAK+LFIGGLNTETNEK	5	IPI00474144;IPI00663587;IPI00775821;IPI00775899;
IPI00125091	Lasp1	lim and sh3 domain protein 1.	29994	Q61792,	0.99	1	MGPSGGEGVEPER	4	IPI00648086;IPI00648929;IPI00649913;
IPI00125138	Csf1	isoform 1 of macrophage colony-stimulating factor 1.	60649	P07141-1,	1	9	AFFLVQDIIDETMR+TFHETPLQLLEK	3	IPI00229812;IPI00882165;
IPI00125220	Ctsz	cathepsin z.	34175	Q9WUU7,	1	137	DQDCDKFNQCGTCTEFK+FNQCGTCTEFK+GDQLALLGR+HGIPDETCNNYQAK+NSWGEPWGEK+NVNGVNYASVTR+TYPRPHEYLSPADLPK+VGDYGSLSGR	1	.
IPI00125270	Tsc22d1	isoform 2 of tsc22 domain family protein 1.	15583	P62500-2,	0.95	1	NSQLEQENNLLK	4	IPI00420803;IPI00464104;IPI00857711;
IPI00125310	C1qa	complement c1q subcomponent subunit a.	25986	P98086,	1	118	DQPRPAFSAIR+DSLSFSNTNNK+GLFQVLAGGTVLQLR+IYQGTEADSIFSGFLIFPSA+QNPMTLGNVVIFDK+RGDEVWIEK+RGDEVWIEKDPAK	2	IPI00828449;
IPI00125328	Epb4.9	dematin.	45468	Q9WV69,	1	3	HLSAEDFSR+QPLTSPGSVSSSR+TLGIISQASTPR	2	IPI00620207;
IPI00125333	Slpi	antileukoproteinase.	14308	P97430,	1	40	CMMLNPPNVCQR+CVNPVPIR+TDWECPGK	1	.
IPI00125442	Alpk3	myocyte induction differentiation originator.	180115	.	1	22	AESQEVADTGGLTSSSTLVPTMEVAGLSPRTSRR+ASMLEVPGAEEEPATGDLVSR+CTIQNEHGSASTDFCLSPEVLSGFISR+DMFMETTR+GIVSCSGVLEVGTMTEYK+HTLQLYR+KGLPSPQGSR+MTDVQIATK+NLVTQRRVDMQVGQMQAGER+RVDMQVGQMQAGER+SSGTRSCDPGLIDSLKNYLLLLLK+TQEPCQEEAMPGEALTGLPAATPEELALGAR+VSSLLVFGPSSETSLLGR	2	IPI00875801;
IPI00125538	Vps13b	vacuolar protein sorting-associated protein 13b.	445924	Q80TY5,	1	77	AFMDISATDLVLR+AHSSAHSKETSTPSDSILNMDEPPVPK+CPVPMLMK+DFLNGPADIYLDVSKPLK+DGGNGEVVTLDEEAFVDAEIR+EDELSIGSAPLGK+IVLQVPAGK+LPALWTKR+NLPLIYINTSVIR+RIQQAAPADPDLPPGYVQSLIR+SSSLPCWDVTPAVGSSELDTATLQK+TEQSSDDLRTGIFQYVQDAESLK+TSCHLAPSCSSMQTCSVVAVEPPPATVK+VVNNVNIVINNLILK+YSGAQDSGIGSDSVKIR	1	.
IPI00125667	Tep1	telomerase protein component 1.	291460	P97499,	0.99	2	GQQSLSLTMSSSPTAVAFSPNGQR+GSTSTSSSLHLK+KIHLGSVTALHVLPGLLVTASK+KLVSLPACLRAAMTDK+KTPCFSEELDLPPGPR+LPAADVAVFHTFLR+LSLVTGQAGQGKTAFLASLVSALK+QALETAVNLSVK+RLCTHLR+SLLGEGPVERPGAR+SMSATAQVQEVALGQWCVSK	1	.
IPI00125829	Slc12a6	isoform 1 of solute carrier family 12 member 6.	127497	Q924N4-1,	0.92	2	LNEVIVNK	6	IPI00230064;IPI00465769;IPI00756318;IPI00857354;IPI00877254;
IPI00125923	Ostf1	osteoclast-stimulating factor 1.	23783	Q62422,	1	7	GYADIVQLLLAK+MSKPPPKPVKPGQVK+TGLIPSNYVAEQAESIDNPLHEAAK	1	.
IPI00125931	Cstb	cystatin-b.	11046	Q62426,	1	5	ERHDELSYF+MMCGAPSATMPATAETQEVADQVK+QIVAGTNLFIK+VFQPLPHENKPLTLSSYQTNK	1	.
IPI00125992	Nptx1	neuronal pentraxin-1.	47117	Q62443,	1	6	CESQSTLDSGPGEAR+CESQSTLDSGPGEARSGGGR+FICTSVPVDADMCAASVAAGGAEELR+ISELEKGQK	1	.
IPI00126000	Fkbp3	fk506-binding protein 3.	25148	Q62446,	1	4	DHLVNAYNHLFESK+DHLVNAYNHLFESKR+FLQDHGSDSFLAEHK+GWDEALLTMSK+MAAAVPQR	1	.
IPI00126050	Pgcp	isoform 1 of plasma glutamate carboxypeptidase.	51813	Q9WVJ3-1,	1	35	AIINLAVYGKYQNR+AIQIMYQNLQQDGLENVHLEQVR+EEIANYEDVAK+EIKEEIANYEDVAK+IIVYNQPYTGYEK+LGLLVDTVGPR+MAILGLGSSIGTPPGGITAEVLVVASFDELQR	2	IPI00877288;
IPI00126172	4931406C07Rik	ester hydrolase c11orf54 homolog.	34996	Q91V76,	1	11	AHIMPAEFSSCPLNSDEAVNK+EPFTFPVR+IAEVGGVPYLLPLVNK+NPADGACLLEK+QTLEEHYGDKPVGMGGTFIVQK+TGELNFVSCMR	1	.
IPI00126175	S100a1	s100 calcium binding protein a1.	10505	.	0.95	1	ELDENGDGEVDFK	3	IPI00554983;IPI00875348;
IPI00126176	Racgap1	rac gtpase-activating protein 1.	70158	Q9WVM1,	0.9	42	AFMEAAEITDEDNSTAAMYQAVSELPQANR+DILMCDTSGSIQLSEEQK+MDTTMVNLWTLFEQLVRR+NQVDVEIK+QFIDGPPGPVK+QFIDGPPGPVKK+SATNLGQQGK+VSLLGPVTTPEFQLVK	1	.
IPI00126184	Gc	vitamin d-binding protein.	53600	P21614,	1	4854	CCESTSEDCMASELPEHTIK+CCSINSPPLYCSSQIDAEMIDTLQS+DKVCNELAMLGK+DLCGQSTTQAMDQYTFELSR+ECCDTQDSVACFSTQSPLLK+ECCDTQDSVACFSTQSPLLKR+EVVSLTEECCAEGADPTCYDTR+FEECCQENTPMNIFMCTYFMPAAEPLQLPAIK+FSSSTFEQVNQLVK+GFADQFLYEYSSNYGQAPLPLLVAYTK+GQEMCADYSENTFTEYK+GQEMCADYSENTFTEYKK+HLSLLTTMSNR+ICQNLSK+KFSSSTFEQVNQLVK+KLCMAALSHQPQEFPTYVEPTNDEICEAFR+LAQKVPTANLENVLPLAEDFTEILSR+LCMAALSHQPQEFPTYVEPTNDEICEAFR+LCMAALSHQPQEFPT…	1	.
IPI00126202	Apof	apolipoprotein f.	35426	Q91V80,	1	8	DGAIDLGYDLLMAMVGASGGPAGAVITAALKPAMK+LGGVEATQALIHHLQELQK+LIQYYYDEK+SLPGFTYMPPVSK	1	.
IPI00126343	Sparc	sparc.	34450	P07214,	1	5	LEAGDHPVELLAR+LHLDYIGPCK+YIAPCLDSELTEFPLR	2	IPI00650029;
IPI00126387	Col19a1	collagen alpha-1(xix) chain.	114197	Q0VF58,	0.88	3	GDPGPVGEPGAMGLPGLEGFPGVK+GEPGDPGPPGLLGSPGLK+GERGYPGIHGEK+GPAGPPGIAGISGKPGAPGPPGVPGEQGER+GSTGPPGHQGPPGNPGIPGTPADAVSFEEIK+IQGGVNVPGYPGPPGPPGPK+KGDVGPRGPPGFPGR	2	IPI00830785;
IPI00126449	Mapk7	isoform 1 of mitogen-activated protein kinase 7.	87733	Q9WVS8-1,	0.83	20	KIPNAFDVVTNAKR+YMHSAQVIHR	5	IPI00648610;IPI00648916;IPI00903353;IPI00903360;
IPI00126834	Vcam1	isoform 1 of vascular cell adhesion protein 1.	81317	P29533-1,	0.98	6	ILETTFIPTIEDTGK+LQEGGAVTMTCSSEGLPAPEIFWGR+QSVQPLYVNVAPK+TQTDSPLNGVVR	2	IPI00653571;
IPI00127100	Coch	cochlin.	59950	Q62507,	1	2	ENYSSVDANGIQSQMLSR+GVIGTSGGPVR+WSASFAVTK	1	.
IPI00127206	Aldob	fructose-bisphosphate aldolase b.	39507	Q91Y97,	1	171	ALQASALAAWGGK+ALQASALAAWGGKAANKK+ATQEAFMKR+CPLPRPWK+DSQGNLFR+ELLFSVDNSISQSIGGVILFHETLYQK+ELSEIAQR+ETTIQGLDGLSER+FPALTPEQK+GILAADESVGTMGNR+IADQCPSSLAIQENANALAR+IKVENTEENR+IKVENTEENRR+KYTPEQVAMATVTALHR+LDQGGAPLAGTNK+LSFSYGR+TVPAAVPGICFLSGGMSEEDATLNLNAINR+YASICQQNGLVPIVEPEVLPDGDHDLEHCQYVSEK+YTPEQVAMATVTALHR	1	.
IPI00127232	Grip1	isoform 1 of glutamate receptor-interacting protein 1.	122058	Q925T6-1,	0.95	4	KFPIPGHSGDLGDGEEDPSPIQKPGK+LLSVDGIR+QTDAQSASSPK+VVLEVEYELPPVSVQGSSVMFR	3	IPI00269503;IPI00399863;
IPI00127277	Smr3a	submaxillary gland androgen-regulated protein 3a.	15544	Q61900,	0.99	4	DSTDIFWR+LWELINSLLQQE	2	IPI00127278;
IPI00127280	Ngp	neutrophilic granule protein.	19332	.	1	7	DCDFLEDGEER+EDTQETSFNDK+EDTQETSFNDKQDVSEK+ETECTSTQER+LLSATPPSSQNPATNIPLQFR+TFVLVVALAVVSCEALR	1	.
IPI00127352	Ambp	ambp protein.	39029	Q07456,	1	302	CIQFHYGGCK+DCLQTCR+DSLLQEFK+DVALNVGISENSIIFMPDR+EDSCQLNYSEGPCLGMQER+EYCGVPGDGYEELIR+GVCEEITGAYQK+LWAFDAAQGK+RAVLPQESEGSGTEPLITGTLK+SSHHHGLTITAK+TIAACNLPIVQGPCR+WYNLAVGSTCPWLSR	1	.
IPI00127358	Sh3bgrl3	sh3 domain-binding glutamic acid-rich-like protein 3.	10477	Q91VW3,	1	15	ATPPQIVNGNHYCGDYELFVEAVEQDTLQEFLK+IQYQLVDISQDNALR	1	.
IPI00127417	Nme2	nucleoside diphosphate kinase b.	17363	Q01768,	1	26	ASEEHLK+DRPFFPGLVK+EIHLWFKPEELIDYK+GDFCIQVGR+GLVGEIIK+NIIHGSDSVESAEK+QHYIDLK+TFIAIKPDGVQR+VMLGETNPADSKPGTIR+YMNSGPVVAMVWEGLNVVK	1	.
IPI00127501	Grcc10	protein c10.	13194	O35127,	0.97	1	SYEAQDPEIASLSGK	1	.
IPI00127504	Olfr666	olfactory receptor mor34-1.	35466	.	0.84	3	SVMLIFPFTLLTKR+VNAIYGLMVALLIGVFDICCISVSYTMILR	2	IPI00163013;
IPI00127506	Comp	cartilage oligomeric matrix protein.	82352	Q9R0G6,	1	13	AVAEPGIQLK+CINTSPGFHCEACPPGFSGPTHEGVGLTFAK+ELQETNAALQDVR+FYEGPELVADSNVVLDTAMR+GDACDDDDDNDGVPDSR+NALWHTGDTASQVR+VPNFDQSDSDGDGVGDACDNCPQK	2	IPI00882289;
IPI00127560	Ttr	transthyretin.	15776	P07309,	1	19	GSPAVDVAVK+LFLLCLAGLVFVSEAGPAGAGESK+TAESGELHGLTTDEK+TLGISPFHEFADVVFTANDSGHR+TSEGSWEPFASGK	1	.
IPI00127596	Ckm	creatine kinase m-type.	43045	P07310,	1	77	AGHPFMWNEHLGYVLTCPSNLGTGLR+DLFDPIIQDR+FCVGLQK+FEEILTR+GGDDLDPNYVLSSR+GQSIDDMIPAQK+GTGGVDTAAVGAVFDISNADR+HNNHMAK+LGSSEVEQVQLVVDGVK+LMVEMEK+LNYKPQEEYPDLSK+LSVEALNSLTGEFK+RGTGGVDTAAVGAVFDISNADR+SFLVWVNEEDHLR+SMTEQEQQQLIDDHFLFDKPVSPLLLASGMAR+TDLNHENLK	1	.
IPI00127625	Hmgcl	hydroxymethylglutaryl-coa lyase, mitochondrial.	34161	P38060,	1	2	EVSVFGAVSELFTR+EVSVFGAVSELFTRK+KLYSMGCYEISLGDTIGVGTPGLMK+NANCSIEESFQR	2	IPI00379694;
IPI00127707	Pcbp2	isoform 1 of poly(rc)-binding protein 2.	38222	Q61990-1,	1	4	ESTGAQVQVAGDMLPNSTER+IANPVEGSTDR+INISEGNCPER+LEEDISSSMTNSTAASRPPVTLR+LVVPASQCGSLIGK+QVTITGSAASISLAQYLINVR	3	IPI00221796;IPI00221799;
IPI00127754	Apbh	androgen-binding protein eta precursor.	10288	.	0.8	1	EDVHLFLFGTPEEYVNYVEK+EHAAAFIEK	1	.
IPI00127764	Pcm1	isoform 1 of pericentriolar material 1 protein.	228833	Q9R0L6-1,	0.91	7	ACPDLQLSATSISSGPTKK+EGENVKPVNSGTWVASNSELTPSESLVTTDDETFEK+KASAQASLASK+QAESLSLTR+QLEALMAEHQR+QRNQKQPEEEAENTK+RQGLAETSSPVAISLR	2	IPI00828325;
IPI00127811	Cx3cl1	fractalkine.	42041	O35188,	1	7	MAPSPLAWLLR+SLGSEEINPVHTDNFQER+VDNVTPGITLATR	2	IPI00331228;
IPI00127856	Orm2	alpha-1-acid glycoprotein 2.	23843	P07361,	1	34	AVTHVGMDESEIIFVDWK+AVTHVGMDESEIIFVDWKK+ETKKDPEEGQA+EYHTIDDHCVYNSTHLGIQR+IFADLIVLK+KDPEEGQA+QQLELEKETK+RPDITPELR+RPDITPELREVFQKAVTHVGMDESEIIFVDWK+WFFIGAAVLNPDYR	1	.
IPI00127933	Abpa	androgen binding protein alpha.	10080	.	0.96	2	TLTEEDKAQATSLINK+VLENAANIK	1	.
IPI00127942	Dstn	destrin.	18522	Q9R0P5,	1	32	AVIFCLSADK+AVIFCLSADKK+CIVVEEGK+CIVVEEGKEILVGDVGATITDPFK+CSTPEEIK+EILVGDVGATITDPFK+HEYQANGPEDLNR+HFVGMLPEK+IFYDMK+KAVIFCLSADKK+KCSTPEEIK+KCSTPEEIKK+KEELMFFLWAPEQAPLK+LGGSLIVAFEGSPV+MIYASSK+YALYDASFETK	1	.
IPI00127989	Ptges3	prostaglandin e synthase 3.	18721	Q9R0Q7,	1	19	DVNVNFEK+HLNEIDLFHCIDPNDSK+LTFSCLGGSDNFK+SILCCLR	2	IPI00830960;
IPI00128127	Dgkg	diacylglycerol kinase gamma.	88523	Q91WG7,	0.96	10	AMLMGVGK	3	IPI00404924;IPI00856989;
IPI00128206	Angptl3	angiopoietin-related protein 3.	52543	Q9R182,	1	17	ALEEQLTNLILSPAGAQEHPEVTSLK+ELLQSVEEQYK+LELQDWK+NSQGFNVYCDTQSGSPWTLIQHR+SFVEQQDNSIR+TGIQEPSENSLSSK+VDPDLSSFDSAPSEPK+VDPDLSSFDSAPSEPKSR	1	.
IPI00128209	Ak1	isoform 1 of adenylate kinase isoenzyme 1.	21540	Q9R0Y5-1,	1	49	GELVPLDTVLDMLR+IGQPTLLLYVDAGAETMTQR+IIFVVGGPGSGK+KVNAEGTVDTVFSEVCTYLDSLK+LETYYNATEPVISFYDK+LETYYNATEPVISFYDKR+RLETYYNATEPVISFYDK+VDDNEETIKK+VDSSNGFLIDGYPR+VNAEGTVDTVFSEVCTYLDSLK+YGYTHLSTGDLLR	2	IPI00750256;
IPI00128249	Ahsg	alpha-2-hs-glycoprotein.	37326	P29699,	1	8127	ANLMHNLGGEEVSVACK+AQNVPLPVSTLVEFVIAATDCTAK+AQNVPLPVSTLVEFVIAATDCTAKEVTDPAK+CNLLAEK+CNLLAEKQHGFCK+ELACDDPEAEQVALLAVDYLNNHLLQGFK+EVTDPAKCNLLAEK+EVTDPAKCNLLAEKQHGFCK+GLSDHRTYHDLR+HAFSPVASVESASGETLHSPK+LFQTQPQPANANAVGPVPTANAALPADPPASVVVGPVVVPR+QLTEHAVEGDCDFHILK+QLTEHAVEGDCDFHILKQDGQFR+QVLNQIDK+QVLNQIDKVK+RPFGVVYEMEVDTLETTCHALDPTPLANCSVR+TYHDLR+TYHDLRHAFSPVASVESASGETLHSPK+VGQPGAAGPVSPMCPGR+VMHTQCHSTPD…	1	.
IPI00128260	Cpn1	carboxypeptidase n catalytic chain.	51845	Q9JJN5,	1	158	AVIQWIR+EALIQFLEQVHQGIK+IHILPSMNPDGYEVAAAQGPNMSGYLVGR+LLLPGTYSVTAK+NFPDLNTYFYYNSK+RSSSQVYPVQR+SLNFVLSANMHGGAVVANYPYDK+SQVEPETR+TSNSPTPDDELFQTLAK+TVTVTVGPAGPTVVDFQLK+YLYVLEFSDYPGIHEPLEPEVK+YVGNMHGNEVLGR	1	.
IPI00128323	Adcy3	adenylate cyclase type 3.	129042	Q8VHH7,	0.83	1	DRPAAFPNGSSVTLPHQVVDNP+EILANVFLYLCAIIVGIMSYYMADRKHR+LLNELFAR+LVAFSSWIDR+MESTGVMGNIQVVEETQVILR	1	.
IPI00128362	Cacna1c	voltage-dependent calcium channel splice variant 1.2-a.	243370	.	0.98	14	AFVQPSTPPYQPLSSHSSEETERK+ALLCLTLKNPIRR+AVAPEDESCAYALGR+CATGEAWQDIMLACMPGKK+FDCFIVCGGILETILVETK+KQGGTTATRPPR+LVSGVPSLQVVLNSIIK+MIRAFVQPSTPPYQPLSSHSSEETER+NMSMPTSETESVNTENVAGGDIEGENCGAR+QCQNGTVCKPGWDGPK+SITADGESPPTTK	1	.
IPI00128363	Mark1	serine/threonine-protein kinase mark1.	88546	Q8VHJ5,	0.83	9	DPSEGEASGR+DSSLTEMSASSMSSAGSTVASAGPSARPR+IDIMVTMGFAR+ISGTSIAFK+KSTASPSNNVYSGGSMAR+RIDIMVTMGFAR+SMSTSGHPIK+STASPSNNVYSGGSMARR+VPAASPSAHSISASTPDR+YDEVMATYILLGR	1	.
IPI00128462	Fgfr2	fibroblast growth factor receptor 2 isoform iiic.	94146	P21803-1,	0.84	2	EAVTVAVK+NVLVTENNVMK+WMAPEALFDR	16	IPI00828688;IPI00828828;IPI00828852;IPI00828871;IPI00844785;IPI00894589;IPI00894775;IPI00894877;IPI00894990;IPI00895144;IPI00895204;IPI00895362;IPI00895429;IPI00895435;IPI00895549;
IPI00128484	Hpx	hemopexin.	51341	Q91X72,	1	6519	CSPDPGLTALLSDHR+DGWHSWPIAHHWPQGPSTVDAAFSWDDK+DYFVSCPGR+EDKVWVYPPEK+EDKVWVYPPEKK+ELGSPPGISLETIDAAFSCPGSSR+FNPVTGEVPPR+FNPVTGEVPPRYPLDAR+GATYAFTGSHYWR+GECQSEGVLFFQGNR+GECQSEGVLFFQGNRK+GGNNLVSGYPK+GGNNLVSGYPKR+GPDSVFLIK+GPDSVFLIKEDK+KENGYPK+KWFWDFATR+LFQEEFPGIPYPPDAAVECHR+LWWLDLK+NPITSVDAAFR+NPITSVDAAFRGPDSVFLIK+RLWWLDLK+SGAQATWTEVSWPHEK+SLGPNTCSSNGSSLYFIHGPNLYCYSSIDK+SLGPNTCSSNGSSLYFIHGPNLYCYSSIDKL…	2	IPI00877345;
IPI00128564	Psmd4	isoform rpn10a of 26s proteasome non-atpase regulatory subunit 4.	40704	O35226-1,	0.99	4	IIAFVGSPVEDNEK+MVLESTMVCVDNSEYMR+SVMGALASQATK	2	IPI00381291;
IPI00128682	Clec11a	c-type lectin domain family 11 member a.	36451	O88200,	1	9	AALAPYNWPVWLGVHDR+DFETQAAAQAR+EWEGGWGGALEEER+LASLDAGLHQLHVR+RLYFVCEFPF+VVELTQGLR	1	.
IPI00128689	Col5a1	collagen alpha-1(v) chain.	183677	O88207,	0.96	15	ALVDGCATKK+GDDGEPGQTGSPGPTGEPGPSGPPGKR+GDPGPSGPPGIPGDDGER+GDRGFDGLAGLPGEKGHR+GEPGDMGPQGPR+GETGDVGQMGPPGPPGPR+GITGKPGPK+GLPGPQGSSGPK+GPPGRPGLPGADGLPGPPGTMLMLPFR+GPSGAPGADGPQGPPGGIGNPGAVGEK+GSEGPPGPPGPAGSPGER+GSPGPVGFPGDPGPPGEPGPAGQDGPPGDK+GTPGKPGPR+NVTLILDCKK+TGPIGPQGAPGKPGPDGLR	1	.
IPI00128703	Pxn	isoform alpha of paxillin.	60811	Q8VI36-2,	0.92	7	ELDELMASLSDFK+KPIAGQVVTAMGK	2	IPI00165881;
IPI00128760	Ube2l3	ubiquitin-conjugating enzyme e2 l3.	17862	P68037,	0.98	1	ADLAEEYSK+ELEEIRK+GQVCLPVISAENWKPATK+IEINFPAEYPFKPPK+IYHPNIDEK+NIQVDEANLLTWQGLIVPDNPPYDK+TDQVIQSLIALVNDPQPEHPLR	1	.
IPI00128857	Me1	nadp-dependent malic enzyme.	63999	P06801,	1	3	LFYSVLMSDVEK+LSDQTVLFQGAGEAALGIAHLVVMAMEK+NKYCTFNDDIQGTASVAVAGLLAALRITK+TLFPGQGNNSYVFPGVALGVVACGLRHIDDK+YLLLMDLQDR	3	IPI00670735;IPI00881197;
IPI00128904	Pcbp1	poly(rc)-binding protein 1.	37498	P60335,	1	18	AITIAGVPQSVTECVK+ESTGAQVQVAGDMLPNSTER+IANPVEGSSGR+IITLTGPTNAIFK+INISEGNCPER+LEEDINSSMTNSTAASRPPVTLR+LNQVARQQSHFAMMHGGTGFAGIDSSSPEVK+LVVPATQCGSLIGK+QQSHFAMMHGGTGFAGIDSSSPEVK+VMTIPYQPMPASSPVICAGGQDR	1	.
IPI00128905	Golm1	golgi membrane protein 1.	44310	Q91XA2,	1	28	DLAETNNQHQQALKPQPK+GIINVPVGSER+IQSSHSFQLENVNK+KFSYDLNQCISQMTEVK+LQEEVPSEEQMPQEK+NINVLNADAQK+SYSSLQQDIFQFQK	1	.
IPI00128975	Dap	death-associated protein 1.	11155	Q91XC8,	0.9	1	TQHIQQPR	1	.
IPI00128986	Tagln3	transgelin-3.	22471	Q9R1Q8,	1	3	GASQAGMTGYGMPR+GPSYGLSR+TTDIFQTVDLWEGK+WLMDGTVLCK	1	.
IPI00129066	Creb3l3	camp-responsive element-binding protein 3-like protein 3.	52145	Q91XE9,	1	5	ATLLDWVASEPLLSPGR+TLHNHAASR+VAPDVTPGSEVPGPWPDVGTPHK+VGLEIPGEMWLSWVPR	1	.
IPI00129096	Pnpo	pyridoxine-5'-phosphate oxidase.	30114	Q91XF0,	1	9	EAFEETHLTSLDPMK+ELDSNPFASLVFYWEPLNR+FFTNYESR+GLATGDSPLGPMTHHGEEDWVYER+SSQIGAVVSR	1	.
IPI00129158	Sirpa	isoform 1 of tyrosine-protein phosphatase non-receptor type substrate1.	56425	P97797-1,	1	19	DGQELHHLETTVNPSGK+EDVVFTCQVK+NNMDFSIR+VICEVAHITLDR+VTQPEKSVSVAAGDSTVLNCTLTSLLPVGPIK+VVLNSMDVHSK	2	IPI00221791;
IPI00129164	Spr	sepiapterin reductase.	27928	Q64105,	1	5	LLLINNAATLGDVSK+LLSPGSVMLVSAR+VVLAAADLGTEAGVQR	1	.
IPI00129186	Npc2	epididymal secretory protein e1.	16442	Q9Z0J0,	1	9	DKVYSYLNK+EVNVSPCPTDPCQLHK+NNLFCWEIPVQITS+VPFPIPEPDGCK	1	.
IPI00129205	Abcc5	multidrug resistance-associated protein 5.	161130	Q9R1X5,	0.88	8	ENLPLVLK+ILILDEATAAMDTETDLLIQETIR+IMVLAQGQVVEFDTPSVLLSNDSSR+INHYIKTLSLEAPAR+KGELLMEDVWPLSK+LDNITQSPFLSHITSSIQGLATIHAYNK+LRGAILTMAFK+MNEVLTYIK+SLGELINICSNDGQR	2	IPI00608032;
IPI00129225	Kng1	isoform lmw of kininogen-1.	47898	O08677-2,	1	141	AGAEPAPER+ATSQVVAGTK+ATSQVVAGTKYVIEFIAR+AYFPCIGCVHAISTDSPDLEPVLK+CQALDMTEMAR+DAEEAATGECTATVGK+DAEEAATGECTATVGKR+DIPVDSPELK+EGNCSAQSGLAWQDCDFK+EGNCSAQSGLAWQDCDFKDAEEAATGECTATVGK+ENEFFIVTQTCK+ERFPSLHGDCVALPNGDDGECR+ESNTELAEDCEIK+ETKCSKESNTELAEDCEIK+EVLGHSIAQLNAENDHPFYYK+FPSLHGDCVALPNGDDGECR+GNLFMDINNK+HLGQSLDCNANVYMRPWENK+KATSQVVAGTK+KATSQVVAGTKYVIEFIAR+QAESSQVK+QAESSQVKQ+RENEFFIVTQTCK+RPPGFSPFR+SG…	1	.
IPI00129227	Olfm1	isoform 4 of noelin.	14508	O88998-4,	0.81	1	CICTVVAPQQTMCSR	5	IPI00136712;IPI00225046;IPI00267253;IPI00720005;
IPI00129240	Vtn	vitronectin.	54849	P29788,	1	1071	CQCDELCTYYQSCCADYMEQCKPQVTR+FEDGVLDPGYPR+GQYCYELDETAVRPGYPK+IYVTGSLSHSAQAK+LIQDVWGIEGPIDAAFTR+NWHGVPGK+QYWEYEFQQQPSQEECEGSSLSAVFEHFALLQR+RVDSVNPPYPR+SIAQYWLGCPTSEK+VDSVNPPYPR	1	.
IPI00129250	Lrg1	leucine-rich alpha-2-glycoprotein.	37431	.	1	385	CAGPEAMK+DMQDGFDISHNPWICDK+ELHLSSNR+LEDSLLAPQPFLR+LHLEGNR+LLDVAELGSL+LQALSPELLAPVPR+NLADLCR	1	.
IPI00129304	Colec12	collectin-12.	81304	Q8K4Q8,	0.9	1	ALSTNSELSTFR+ESHWIGLTDSEQESEWK+GPPGPPGPSGAMEPLALQNEPTPASEVNGCPPHWK+GSPGKPGPQGPSGDPGPPGPPGK	1	.
IPI00129318	H2-Aa	h-2 class ii histocompatibility antigen, i-e alpha chain (fragment).	28013	P23150,	0.98	1	SVTDGVYETSFLVNR	7	IPI00172039;IPI00474022;IPI00475324;IPI00554851;IPI00554925;IPI00903388;
IPI00129319	Ppp1r7	protein phosphatase 1 regulatory subunit 7.	41292	Q3UM45,	0.9	1	GAEDPEEEHELAVDMETINLDR+LQNLDALTNLTVLSVQSNR	1	.
IPI00129323	Sfrs3	isoform long of splicing factor, arginine/serine-rich 3.	19330	P84104-1,	0.98	1	NPPGFAFVEFEDPR	9	IPI00153743;IPI00221826;IPI00222763;IPI00346575;IPI00474158;IPI00474169;IPI00474970;IPI00649438;
IPI00129384	Ccl8	c-c motif chemokine 8.	11017	Q9Z121,	1	75	APVTCCFHVLK+INNIQCPMEAVVFQTK+LTGPDKAPVTCCFHVLK+QGMSLCVDPTQK+WVSEYMEILDQK	1	.
IPI00129393	Pf4	platelet factor 4.	11243	Q9Z126,	1	18	HCAVPQLIATLK+HITSLEVIK	1	.
IPI00129401	Recql	isoform alpha of atp-dependent dna helicase q1.	72552	Q9Z129-1,	0.98	9	ACLLSNEAHAVTMQVK+DVSFEKK+KDIFLVMPTGGGK+LGIHAGTYHANMEPEDK+QFPNASLMGLTATATNHVLK+QLGISATMLNASSSK+QYLEDSSAEASSDLDTSPAAWNK+RQFPNASLMGLTATATNHVLK+RVLIAQHFDEVWNADACNK+VHTQWSANELQVVVATVAFGMGIDKPDVR	5	IPI00230278;IPI00762820;IPI00775903;IPI00830742;
IPI00129468	Cbx3	chromobox protein homolog 3.	20855	P23198,	0.99	2	VEEAEPEEFVVEK	10	IPI00381658;IPI00605662;IPI00625302;IPI00660374;IPI00660820;IPI00677454;IPI00678989;IPI00775987;IPI00776057;
IPI00129472	Sipa1	signal-induced proliferation-associated protein 1.	112066	P46062,	0.95	10	AALEEEVR+EGSGGGTLHSYR+LGPETAAQMLR+RGMAPAPTDDLFARK	1	.
IPI00129509	Glycam1	glycosylation-dependent cell adhesion molecule 1.	16209	Q02596,	1	107	DNVVIESTKPENQEAQDGLR+IIEGFVTGAEDIISGASR	1	.
IPI00129517	Prdx5	isoform mitochondrial of peroxiredoxin-5, mitochondrial.	21897	P99029-1,	1	30	AHQAEGKVRLLADPTGAFGK+ALNVEPDGTGLTCSLAPNILSQL+ATDLLLDDSLVSLFGNR+FSMVIDNGIVK+GAQVVACLSVNDVFVIEEWGR+GVLFGVPGAFTPGCSK+KGVLFGVPGAFTPGCSK+LLADPTGAFGK+THLPGFVEQAGALK+VGDAIPSVEVFEGEPGK+VGDAIPSVEVFEGEPGKK+VNLAELFK	2	IPI00759999;
IPI00129571	Col3a1	collagen alpha-1(iii) chain.	138943	P08121,	1	70	DGPPGPAGNSGSPGNPGIAGPK+FTYTVLEDGCTK+GEGGPPGPAGPTGSSGPAGPPGPQGVK+GEGGSPGLPGIAGPR+GERGSEGSPGHPGQPGPPGPPGAPGPCCGGGAAAIAGVGGEK+GEVGAPGAPGGK+GEVGAPGAPGGKGDSGAPGER+GGAGPPGPEGGK+GLPGPPGNNGNPGPPGPSGAPGK+GPAGMPGFPGMK+GPAGPNGIPGEK+GPAGPPGPPGASGSPGLQGMPGER+GQPGVMGFPGPK+GSDGQPGPPGPPGTAGFPGSPGAK+INTEEIMSSLK+KHWWTDSGAEK+LMGSNEGEFK+NSIAYMDQASGNVK+SGEYWVDPNQGCK+SGGFSPYYGDDPMDFK+SVNGQIESLISPDGSR	1	.
IPI00129669	Klk6	serine protease.	27496	.	0.97	1	EGNDSCQGDSGGPLVCGGR+GLVSWGDMPCGSK+MENGDFPDTIQCADVHLVPR	2	IPI00886280;
IPI00129685	Tpt1	translationally-controlled tumor protein.	20249	P63028,	1	18	DGLEMEK+DLISHDELFSDIYK+EIADGLCLEVEGK+VKPFMTGAAEQIK	1	.
IPI00129755	Serpina1b	alpha-1-antitrypsin 1-2.	45975	P22599,	1	1406	AVLTIDETGTEAAAATVFEAVPMSMPPILR+DQSPASHEIATNLGDFAISLYR+ELDQDTVFALANYILFK+FDHPFLFIIFEEHTQSPIFVGK+FDHPFLFIIFEEHTQSPLFVGK+IFNNGADLSGITEENAPLK+IFNNGADLSGITEENAPLKLSK+IFNNGADLSGITEENAPLKLSKAVHK+IVEAVKELDQDTVFALANYILFK+KPFDPENTEEAEFHVDK+KPFDPENTEEAEFHVDKSTTVK+KVINDFVEK+LSISGDYNLK+LVQIHIPR+MQHLEQTLNK+MQHLEQTLNKELISK+NHYQAEVFSVNFAESEEAK+NHYQAEVFSVNFAESEEAKK+RLVQIHIPR+SFQHLLQTLNRPDSELQLSTGNGLFVNNDLK+TLMSPL…	1	.
IPI00129803	Tap1	antigen peptide transporter 1.	79005	P21958,	0.96	11	EALAYVAEVWTTSVSGMLLK+EGSVGEQGTHLQLMKRGGCYR	1	.
IPI00129928	Fh1	isoform mitochondrial of fumarate hydratase, mitochondrial.	54371	P97807-1,	1	26	AAAEVNQEYGLDPK+AIEMLGGELGSK+IYELAAGGTAVGTGLNTR+LMNESLMLVTALNPHIGYDK+LNDHFPLVVWQTGSGTQTNMNVNEVISNR+MPIPVIQAFGILK+SGLGELILPENEPGSSIMPGK+SQSSNDTFPTAMHIAAAVEVHK+THTQDAVPLTLGQEFSGYVQQVQYAMVR+VEFDTFGELK+VEFDTFGELKVPTDK+VLLPGLQK	2	IPI00759940;
IPI00129965	A1bg	alpha-1-b glycoprotein.	56554	.	1	1826	CGVEPPVDIHLPALNK+CHGHVPR+CTAPVSGLR+DAILYYVNLK+DLEPGSTVQLR+EGFKTPFAVASTR+ELDNPGPFTCR+EPLPRPLAHADPVDWITPGGLPVYVMCQVAMR+FSLGAITSNNSGIYR+GVTYLLR+IHGFSPTR+LETQVLSYR+MYASQAPPTLCLMGNYLMIYPQK+NAAEFQLR+QEGVDGVQKPDVQHK+STVHLGQEAIFR+TPFAVASTR+TYETLACK+VFELIQNGWFLSQVR+VNGPPPKPR+VSMELVR+WTMLSNAVEVTGK+YMHVWSEDSKPVELMWSDETLQAPVLTAEPSSR+YTALPPFTFESGISDPVEVIVEG	1	.
IPI00130010	Cfh	complement component factor h.	141271	P06909,	1	2098	CDNGFSPPSGYSWDYLR+CGPPPPIDNGDITSLSLPVYEPLSSVEYQCQK+CKQGYVTNTGEISGSITCLQNGWSPQPSCIK+CLPVTELENGR+CRPGYR+CSPPYILNGIYTPHR+CSVPPYHHGDSVEFICEENFTMIGHGSVSCISGK+CTAQGWEPEVPCVR+CTLKPCEFPQFK+CTPTGWIPVPR+CVATDQLEK+CVEILCTPPR+CVFHYVENGDSAYWEK+DKQEYER+DSIESSSHEHGTTFSYVCDDGFR+ECGADGWINDIPLCEVVK+ECSVPTLDR+EIHCSENGLWSNEKPR+ENSEILSGSWSEQLYPEGTQATYK+ERGDAVCTGSGWSSQPFCEEK+FECNSGFK+GDAVCTGSGWSSQPFCEEK+GQVASCAPPLEILN…	1	.
IPI00130018	Lypla1	isoform 1 of acyl-protein thioesterase 1.	24688	P97823-1,	0.96	1	ASFSQGPINSANR+MCGNNMSAPMPAVVPAARK	2	IPI00400117;
IPI00130095	G3bp1	ras gtpase-activating protein-binding protein 1.	51829	P97855,	0.99	2	DFFQNFGNVVELR+EAGEPGDVEPR+GGPSGGMRGPPRGGMVQKPGFGVGR+VPASQPRPESKPDSQIPPQRPQR	1	.
IPI00130099	Adamts1	a disintegrin and metalloproteinase with thrombospondin motifs 1.	105842	P97857,	1	12	CGVCGGNGSTCKK+CGVMDDETLPTSDSRPESQNTR+EEQCEAHNEFSK+EPLTIQVLMVGHALRPK+EPLTIQVLMVGHALRPKIKFTYFMK+FYKHPSIRNSISLVVVK+GAFYLQGEEFFIQPAPGVATER+GSLSAHMLLLLLASITMLLCAR+KMSGIVTSTRPGYHDIVTIPAGATNIEVK+LQPDSGFLAPGFTLQTVGR+NSISLVVVKILVIYEEQK	1	.
IPI00130240	Ppic	peptidyl-prolyl cis-trans isomerase c.	22794	P30412,	0.91	5	IVIGLFGNVVPK+LLLPAVLCLGLGALVSSSGSSGVR+MSPGPRLLLPAVLCLGLGALVSSSGSSGVRK+TPFVVEVPDW+TVENFVALATGEK	1	.
IPI00130307	Chgb	secretogranin-1.	77969	P16014,	1	26	ADEFPDFYDSEEQMGPHQEANDEK+EDAGAPVEDSQGQTK+EGVDDQESLRPSNQQASK+ELENLAAMDLELQK+GNPDDSFLEDEGEDR+LLDEGHYPVR+LLRDPADASGTR+MQPAMLLGLLGAAALAAVSSAPVDNR+NHPDSELESTANR+NYLNYGEEGDQGR+QYDGVAELDQLLHYR+QYEPYPITEK+WTEGGGHSR	2	IPI00652806;
IPI00130343	Hnrnpc	bone marrow macrophage cdna, riken full-length enriched library,clone:i830120c02 product:heterogeneous nuclear ribonucleoprotein c,full insert sequence.	36905	.	1	9	LKGDDLQAIK+QADLSFSSPVEMK+QKVDSLLESLEK+VDSLLESLEK+VFIGNLNTLVVK	3	IPI00223443;IPI00874321;
IPI00130369	Acot5	acyl-coenzyme a thioesterase 5.	46520	Q6Q2Z6,	0.94	9	EESLPGLGMHLER+GAELSLSMASFLK+GFAVMALAYYK+GPGVGLLGISK	2	IPI00467177;
IPI00130382	Apom	apolipoprotein m.	21273	Q9Z1R3,	1	96	AFLVTPR+FLLYNR+TDLFSSSCPGGIMLK	1	.
IPI00130391	.	protease, serine, 1.	26135	.	0.89	77	LGEHNINVLEGNEQFIDAAK+LSSPVTLNAR+TLNNDIMLIK+VCNYVDWIQDTIAAN	1	.
IPI00130444	Ap3b1	ap-3 complex subunit beta-1.	122870	Q9Z1T1,	0.89	13	EASADLSPYVR+KGMFEPYLK+KIFLAPKPAPLLESPFK+LEILTNLANEANISTLLR+QPCIFSDKMVSVQITLTNTSDRK	1	.
IPI00130445	Thbs4	thrombospondin-4.	106366	Q9Z1T2,	1	56	AVAEPGIQLK+CVNLAPGFR+DGIGDACDEDADGDGILNEQDNCVLTHNIDQR+DVDIDSYPDEELPCSAR+GDACDDDMDGDGIK+NILDNCPR+NPEQNPCSVHAQCIEER+NSDKDIFGDACDNCR+NSLWHTGDTSDQVR+QFLGQMTQLNQLLGEVK+QTEQTYWQATPFR+QVCTDVDECQNGACVLNSICINTLGSYR+YHPCYPGVR	1	.
IPI00130449	Pip5k3	isoform 2 of fyve finger-containing phosphoinositide kinase.	232081	Q9Z1T6-1,	0.99	39	EALSSEDSTLLESR+EGLESQGLEPQDEVDGGDTQK+FDSVVVNGFVCTK+ICHHTSGMEFQDHR+KILLDSAQLK+KTYALTFK+LDLLVMENLFYGR+LRGGSDYELAR+MPTVVSPELYR+NISPGLHNGEK+NISPGLHNGEKEDR+QLTNPHVELQFSDANAK+YFLMVPDHWTGLDLNC	2	IPI00230618;
IPI00130549	Fgfr1	isoform 1 of basic fibroblast growth factor receptor 1.	91981	P16092-1,	1	3	CPSSGTPNPTLR+IGPDNLPYVQILK+WMAPEALFDR+YATWSIIMDSVVPSDK	5	IPI00399479;IPI00466590;IPI00894695;IPI00894725;
IPI00130589	Sod1	superoxide dismutase [cu-zn].	15943	P08228,	1	58	DGVANVSIEDR+GDGPVQGTIHFEQK+HGGPADEER+HVGDLGNVTAGK+LACGVIGIAQ+TMVVHEK+VISLSGEHSIIGR	1	.
IPI00130640	Hrsp12	ribonuclease uk114.	14255	P52760,	1	140	AAGCDFNNVVK+AAYQVAALPR+APAAIGPYSQAVQVDR+TIYISGQVGLDPSSGQLVPGGVVEEAK+TTVLLADMNDFGTVNEIYK+TYFQGSLPAR+VEIEAIAVQGPFIK	1	.
IPI00130758	Itm2b	integral membrane protein 2b.	30260	O89051,	1	11	DDVILNEPSADAPAAR+IENVDNLGFFIYR+NLLELLINIK+REASNCFTIR+VTFNSALAQK+YFALQPDDVYYCGLK	1	.
IPI00130792	Crebl1	cyclic amp-dependent transcription factor atf-6 beta.	76007	O35451,	1	21	DLDQLFLSSDCR+DPVGQLQLYR+EDTFYVVSFR+GPPGDYEEMMQIECEVMDTR+KEYLQGLEAR+KEYLQGLEARLQAVLADNQQLR+KPPLQPKPVVLTTVPVPPR+KSIVPAPMPGNSCPPEVDAK+LADELSGWVQR+MSLVMPAMAPNETVSGR+SQPEFLDAIDR	1	.
IPI00130883	Rbm3	putative rna-binding protein 3.	16605	O89086,	0.98	1	GFGFITFTNPEHASDAMR+GGGDQGYGSGR	2	IPI00378187;
IPI00130950	Bhmt	betaine--homocysteine s-methyltransferase 1.	45021	O35490,	1	39	AGASIVGVNCHFDPSVSLQTVK+AGPWTPEAAVEHPEAVR+AGSNVMQTFTFYASEDK+AGSNVMQTFTFYASEDKLENR+AIAEELAPER+ASGKPVAATMCIGPEGDLHGVPPGECAVR+AYLMSQPLAYHTPDCGK+HGSWGSGLDMHTKPWIR+IASGRPYNPSMSRPDAWGVTK+QGFIDLPEFPFGLEPR+QVADEGDALVAGGVSQTPSYLSCK+YIGGCCGFEPYHIR	2	IPI00621473;
IPI00131000	Eif2ak3	eukaryotic translation initiation factor 2-alpha kinase 3.	124682	Q9Z2B5,	1	8	EIFGTILLCIVATTFIVR+QPSCSYSPLPGN+RCSLEDR+SREGTSSSIVFEDSGCGNASSK+YICSALGCR+YSGYVSR	1	.
IPI00131038	Figf	vascular endothelial growth factor d.	40909	P97946,	1	6	AASSLEELLQIAHSEDWK+ETCVEVASELGK+FAATFYDTETLK+QLFEISVPLTSVPELVPVK	2	IPI00753976;
IPI00131088	Mbd2	isoform 1 of methyl-cpg-binding domain protein 2.	43543	Q9Z2E1-1,	1	11	DPVPFPSGSSGPGPR+GRPQSGGSGLGGDGGGGAGGCGVGSGGGVAPR+GRPQSGGSGLGGDGGGGAGGCGVGSGGGVAPRR+RMDCPALPPGWKK+SDVYYFSPSGK	2	IPI00454212;
IPI00131091	C4b	complement c4-b.	192885	P01029,	1	231	AASWLTHQGSFHGAFR+APHIQLVAQSPWLR+ASAGLLGAHAAAITAYALTLTK+ATETQGVNLLFSSR+CCQDGMTK+CSVFYAAPTK+DFLMEFSSR+DHAVDLIQK+DQFQAALDK+DSSTWLTAFVLK+DTMASIGQTR+ECVGFGASQEVVVGLVQPSSAVLYDYYSPDHK+EELVYNLDPLNNLGR+EGAIHREELVYNLDPLNNLGR+EIFTSTSIFQDAFTIPDISEPGTWK+EPFLSCCK+EYLIMGMDGETSDNK+FACYYPR+FALMDEQGK+FALMDEQGKR+FHLHLR+FSLGSTISVK+FVSSAFSLDLSR+GDPQYLLDSNTWIEEMPSEQMCK+GHIFVQTDQPIYNPGQR+GLEEELK+GQIMAMGR+GTGFLSIEPLDPR+…	1	.
IPI00131138	Flna	isoform 1 of filamin-a.	281194	Q8BTM8-1,	1	5	AYGPGIEPTGNMVKK+DAGEGLLAVQITDPEGKPKK+EEGPYEVEVTYDGVPVPGSPFPLEAVAPTKPSK+FNEEHIPDSPFVVPVASPSGDAR+GAGTGGLGLAVEGPSEAKMSCMDNK+IVSPSGAAVPCK+KTHIQDNHDGTYTVAYVPDVPGR+TPCEEILVK+VATVPQHATSGPGPADVSK+VHGPGIQSGTTNKPNK+VNQPASFAVSLNGAK	5	IPI00664643;IPI00875567;IPI00885630;IPI00886409;
IPI00131168	Bche	cholinesterase.	68521	Q03311,	1	22	AILESGSSNAPWAVK+AQILVGVNK+DALDDVIGDYNIICPALEFTK+EAVLFYYVDWLGEQSPEVYR+FVLPSDSILSINFGPTVDGDFLTDMPHTLLQLGK+LPWPEWMGVMHGYEIEFVFGLPLGRR+VIVVSMNYR+VLEMTGDIDETEQEWK+YLTLNTEK	2	IPI00649671;
IPI00131186	Btf3	isoform 2 of transcription factor btf3.	17699	Q64152-2,	1	6	APLATGEDDDDEVPDLVENFDEASK+QLTEMLPSILNQLGADSLTSLR+QLTEMLPSILNQLGADSLTSLRR	2	IPI00515257;
IPI00131228	Pmm2	phosphomannomutase 2.	27657	Q9Z2M7,	1	4	LQEQLGNDVVEK+QKITEEMDGFLQKLR+TMPGGNDHEIFTDPR+TVGYTVTAPEDTR	1	.
IPI00131330	Usp32	ubiquitin specific protease 32.	181733	.	0.83	4	AFTSEEELGENEMYYCSK+ATSLTLEGGR+EISCGLSACCR+LWLYNSENYLTLLDDEDHR+NRPSLFGMPLIVPCTVHTR+VGHLTLEDYQIWSVK+VLAYTGCFSR+YSDNISSASEASESTGSGFLYSGTPGADMCFAR	1	.
IPI00131376	Spnb1	spectrin beta 1.	268091	P15508,	1	50	AHILSAEFGK+DLTSVLILQRK+ELTLWINDK+FFSMVR+GLQDALQGQELSLGEASK+LQTHADLNK+RFSFFPK+YFYTGTEILGLIDEK	1	.
IPI00131398	Mbl1	mannose-binding protein a.	25396	P39039,	1	521	AIQEVATGIAFLGITDEATEGQFMYVTGGR+DEPNNHGSGEDCVIILDNGLWNDISCQASFK+KDEPNNHGSGEDCVIILDNGLWNDISCQASFK+KLFVTNHEK+LANMEAEIR+LFVTNHEK+LHAFSMGK+LTYSNWK+SLCTELQGTVAIPR+TCSVIACGR	1	.
IPI00131406	Psma7	proteasome subunit alpha type-7.	27855	Q9Z2U0,	1	72	AITVFSPDGHLFQVEYAQEAVK+ALLEVVQSGGK+DIVVLGVEK+GKDIVVLGVEK+ICALDDNVCMAFAGLTADAR+ILNPEEIEK+KGSTAVGVR+LTVEDPVTVEYITR+LYQTDPSGTYHAWK+NIELAVMR+NYTDDAIETDDLTIK+VECQSHR+YVAEIEKEK+YVAEIEKEKEENEK	1	.
IPI00131407	Psma5	proteasome subunit alpha type-5.	26411	Q9Z2U1,	1	6	EELEEVIKDI+LFQVEYAIEAIK+LNATNIELATVQPGQNFHMFTK	1	.
IPI00131459	Nme1	nucleoside diphosphate kinase a.	17208	P15532,	1	5	DRPFFTGLVK+EISLWFQPEELVEYK+FLQASEDLLK+GDFCIQVGR+GLVGEIIK+TFIAIKPDGVQR+VMLGETNPADSKPGTIR	1	.
IPI00131464	B4galt1	isoform long of beta-1,4-galactosyltransferase 1.	44411	P15535-1,	1	6	FGFSLPYVQYFGGVSALSK+GMSISRPNAVVGR+LLNIGFQEALK+VAIIIPFR+VAILIPFR	2	IPI00760067;
IPI00131498	Cd93	complement component c1q receptor.	69354	O89103,	1	22	GFSWVGGGEDTAYSNWYK+GTVFSELPARPPQK+LLDDLVTCASR+RCVSLILDLSLTPHPSHLPK+SETHYFLCNEK+VTYTTPFQATTSSLEAVPFASVANVACGDEAK	1	.
IPI00131548	Prosc	proline synthetase co-transcribed bacterial homolog protein.	30049	Q9Z2Y8,	1	8	TKPADMVIEAYGHGQR+VMVQINTSGEDSK	4	IPI00654420;IPI00719901;IPI00720189;
IPI00131673	1810009J06Rik	riken cdna 1810009j06.	26503	.	0.8	40	GKPGVYTK+IVGGYTCPK+LGEHNIDVLEGGEQFIDAEK	2	IPI00849742;
IPI00131674	2210010C04Rik	trypsinogen 7.	26422	.	1	102	DSCQGDSGGPVVCNGQLQGVVSWGYGCAQR+GKPGVYTK+HPNYNANTYNNDIMLIK+ITSNMFCLGFLEGGK+LGEHNIDALEGGEQFIDAAK+TAATLNSR+VSTVALPR+YVNWIQQTIAAN	1	.
IPI00131695	Alb	serum albumin.	68693	P07724,	1	213	AADKDTCFSTEGPNLVTR+AETFTFHSDICTLPEK+AETFTFHSDICTLPEKEK+AHCLSEVEHDTMPADLPAIAADFVEDQEVCK+APQVSTPTLVEAAR+CCAEANPPACYGTVLAEFQPLVEEPK+DDNPSLPPFERPEAEAMCTSFK+DTCFSTEGPNLVTR+DVFLGTFLYEYSR+ECCHGDLLECADDR+ENPTTFMGHYLHEVAR+ENYGELADCCTK+GLVLIAFSQYLQK+KQTALAELVK+LCAIPNLR+LGEYGFQNAILVR+LPCVEDYLSAILNR+LQTCCDKPLLK+LSQTFPNADFAEITK+LVQEVTDFAK+QTALAELVK+RHPDYSVSLLLR+RPCFSALTVDETYVPK+SLHTLFGDK+TPVSEHVTK+TVMDDFAQFLD…	1	.
IPI00131830	Serpina3k	serine protease inhibitor a3k.	46880	P07759,	1	11620	AILPAVHFNRPFLFVIYHTSAQSILFMAK+ALYQTEAFTADFQQPTEAK+AVLDVAETGTEAAAATGVIGGIR+AVLDVAETGTEAAAATGVIGGIRK+DEELSCSVLELK+DLQILAEFHEK+ELISELDER+EVFTEQADLSGITETK+EVFTEQADLSGITETKK+FSIASNYR+GKTMEEILEGLK+HFRDEELSCSVLELK+ISFDPQDTFESEFYLDEK+ISFDPQDTFESEFYLDEKR+KLSVSQVVHK+KTLFPSQIEELNLPK+LALKNPDTNIVFSPLSISAALALVSLGAK+LEEDVLPEMGIK+LSVSQVVHK+MAFIVAMGMILMAGICPAVLCFPDGTK+MQQVEASLQPETLR+MQQVEASLQPETLRK+NLINDYVSNQTQGM…	1	.
IPI00131845	Psma6	proteasome subunit alpha type-6.	27372	Q9QUM9,	1	7	AINQGGLTSVAVR+HITIFSPEGR+LYQVEYAFK+QTESTSFLEK	1	.
IPI00131881	Adam10	adam 10.	83967	O35598,	1	6	CRLVDADGPLARLK+DFDDGVLGLAWVGAPSGSSGGICEK+DTSLFSDEFK+GGTFYIEPAER+ILPFHSVIYHEDDINYPHK+QCSPSQGPCCTAQCAFK+YGPQGGCADHSVFER	1	.
IPI00131904	Dkk3	dickkopf-related protein 3.	38388	Q9QUN9,	1	56	DCQPGLCCAFQR+DSECCGDQLCAWGHCTQK+EAPDEYEDVGFIGEVR+EVEELMEDTQHK+QELEDLER+SAVEEMEAEEAAAK+SHECIIDEDCGPTR+SLAQEMAFEGPAPVESLGGEEEI+YCQFSSFK	1	.
IPI00131957	Glipr1l2	isoform 1 of glipr1-like protein 2.	37784	Q9CQ35-1,	0.93	71	VASLLLCVIVVLIVQSR	1	.
IPI00132043	Ela3	putative uncharacterized protein.	28905	.	1	14	GVEEGQEQVIPINAGDLFVHPK+LQQALLPVVDYEHCSR+TYQVVLGEHER	1	.
IPI00132067	Fbln2	isoform 1 of fibulin-2.	131818	P37889-1,	1	33	AEEDIDPNSVHSVPR+CMDGFLQDPEGNCVDINECTSLLEPCR+FRAEEDIDPNSVHSVPR+IGPAPAFAGDTISLTITK+LWRQGSVTTFLAKMYIFFTTFAP+SCVAGVMGAK+VSEMEMASR+YAAGHTVHLSSCR	3	IPI00750260;IPI00830803;
IPI00132080	Pgls	6-phosphogluconolactonase.	27254	Q9CQ60,	1	23	DLPAAAAPAGPASFAR+EGTLPAALVQPR+IVAPISDSPKPPPQR+LLSVPFEK+LPIPDSQVLTINPALPVEDAAEDYAR+LVPFDHAESTYGLYR+QALQGDAVPVFDLLILGVGPDGHTCSLFPDHPLLQER+TGALCWFLDEAAAR+VTLTLPVLNAAQSIIFVATGEGK+WTLGFCDER	1	.
IPI00132093	Pin1	peptidyl-prolyl cis-trans isomerase nima-interacting 1.	18370	Q9QUR7,	1	8	EEALELINGYIQK+GDLGPFSR+SGEEDFESLASQFSDCSSAK+TGEMSGPVFTDSGIHIILR	1	.
IPI00132096	Mtap	s-methyl-5'-thioadenosine phosphorylase.	31062	Q9CQ65,	0.97	1	TSLRPQTFYDGSHCSAR	1	.
IPI00132111	Pglyrp1	peptidoglycan recognition protein.	20489	O88593,	0.98	1	MLFACALLALLGLATSCSFIVPR+YVVISHTAGSFCNSPDSCEQQAR	1	.
IPI00132121	Egf	pro-epidermal growth factor.	133144	P01132,	0.98	53	DGNLCSDIDECVLAR+IDPDGTNHQQLVVDAGISADMDIHYK+LMFWSSEVTGSLHR+QMGMVFALDYDPVESK+SVIEMANLDGSK+VFLNGTGLEK	2	IPI00890244;
IPI00132194	Scye1	small inducible cytokine subfamily e, member 1.	35167	P31230,	1	11	EIEELKQELILAEIHNGVEQVR+IWEQIQPDLHTNAECVATYK+LSTPLQTNCTASESVVQSPSVATTASPATK+VEILAPPNGSVPGDR	1	.
IPI00132195	Crisp1	cysteine-rich secretory protein 1.	27680	Q03401,	1	3	CTFSHSPIELR+MLSCEHELLK+MSVQEEIVSK+MVSPSGSDLLK	1	.
IPI00132200	Tff2	trefoil factor 2.	14172	Q03404,	0.97	4	NCGYPGISPEDCASR	2	IPI00331352;
IPI00132217	Fis1	mitochondrial fission 1 protein.	17009	Q9CQ92,	1	4	DGLVGMAIVGGMALGVAGLAGLIGLAVSK+GIVLLEELLPK+GLLQTEPQNNQAK+KFQSEQAAGSVSK	2	IPI00857192;
IPI00132238	Pdgfb	platelet-derived growth factor subunit b.	27382	P31240,	1	5	ASQVQMRPVQVR+SLGSLAAAEPAVIAECK+TEVFQISR	2	IPI00749971;
IPI00132314	Nucb1	nucleobindin-1.	53409	Q02819,	1	116	ADTDDAPVPAPAGDQK+DLAQYDAAHHEEFK+DLAQYDAAHHEEFKR+DLELLIQTATR+EAELNARAQRLSQETEALGR+EFGDTGEGWK+ELQQAVLQMEQR+EVWEELDGLDPNR+FEEELAAR+GAPFLLLPPLLMLSAVLAVPVDR+KEFGDTGEGWK+KQQLQEQSAPPSKPDGQLQFR+KVPEQPPELPQLDSQHL+LSQELDFVSHNVR+LVTLEEFLASTQR+MLLKAKMDAK+NVDTNQDR+QEPNLQVDHMNLLK+QFEHLDPQNQHTFEAR+QQLQEQSAPPSKPDGQLQFR+RFEEELAAR+TFFILHDINSDGVLDEQELEALFTK+TVEMSPAYTEEELK+TVEMSPAYTEEELKR+VNVPGSQAQLK+VPEQPPELPQLDSQH…	1	.
IPI00132377	Clps	colipase.	12445	Q9CQC2,	1	6	CCQHDTILGIAR+GLIINLEDGEICLNSMQCK+TLYGIYYR	1	.
IPI00132416	Spink3	serine protease inhibitor kazal-type 3.	8488	P09036,	1	5	EASCHDAVAGCPR+IYDPVCGTDGITYANECVLCFENR	1	.
IPI00132443	Hnrnpm	isoform 1 of heterogeneous nuclear ribonucleoprotein m.	77649	Q9D0E1-1,	1	28	GNFGGSFAGSFGGAGGHAPGVAR+GNFGGSFAGSFGGAGGHAPGVARK+HSLSGRPLK+IGGMEGPFGGGMENMGR+INEILSNALKR+KAAEVLNK+LGSTVFVANLDYK+MEEESGAPCVPSGNGAPGPK+MGAGLGHGMDRVGSEIERMGLVMDR+MGAGMGFGLER+MGANSLER+MGLAMGGAGGASFDR+MGLSMDR+MGPAMGPALGAGIER+MGPLGLDHMASSIER+MVPTGMGASLER+QGGGGAGGSVPGIER	2	IPI00480357;
IPI00132485	Pfdn1	prefoldin subunit 1.	14255	Q9CWM4,	0.97	5	EVIHNQLLEK+LADIQIEQLNR	2	IPI00467296;
IPI00132539	Btf3l4	transcription factor btf3 homolog 4.	17271	Q9CQH7,	0.97	3	APKPEDIDEEDDDVPDLVENFDEASK+LAVNNIAGIEEVNMIK	1	.
IPI00132575	Cotl1	coactosin-like protein.	15944	Q9CQI6,	0.95	1	FALITWIGEDVSGLQR	1	.
IPI00132801	Glp1r	glucagon-like peptide 1 receptor.	55878	O35659,	0.95	3	LALLLLGAVGR+MASTPSLLR	3	IPI00850428;IPI00875884;
IPI00132872	Adam19	adam 19.	100860	O35674,	0.88	23	CNGHGVCNNNK+DWALQFTHQTKK+ELILDLEK+GPEEEEGEGDMLDPGLVMTGTK+HQFSCPFR+NRHDQDATKR+NTSFFETEGCGK+YLQTGGGMCLSNMPDTR	1	.
IPI00132901	Lsm7	u6 snrna-associated sm-like protein lsm7.	11636	Q9CQQ8,	0.96	1	ESILDLSK+GFDPLLNLVLDGTMEYMRDPDDQYK	1	.
IPI00132958	Them2	thioesterase superfamily member 2.	15183	Q9CQR4,	1	3	GAPGVSVDMNITYMSPAK+MSSMTQNLR+TLAFASVDLTNK	1	.
IPI00133034	Hint2	histidine triad nucleotide-binding protein 2.	17320	Q9D0S9,	1	18	AAPGGASPTIFSR+DVAPQAPVHFLVIPR+ISQAEEDDQQLLGHLLLVAK+MAAAVLLAVGLR	1	.
IPI00133076	Gkn1	gastrokine-1.	20134	Q9CR36,	0.92	1	CYTADILWILR	1	.
IPI00133103	Creg1	protein creg1.	24452	O88668,	0.95	8	IWVLDYFGGPK	2	IPI00830363;
IPI00133206	Psmc3	26s protease regulatory subunit 6a.	49493	O88685,	1	2	EKAPSIIFIDELDAIGTK+QTYFLPVIGLVDAEK+VDILDPALLR	3	IPI00405114;IPI00758064;
IPI00133222	Proz	vitamin k-dependent protein z.	44304	Q9CQW3,	1	605	CACGALTSEHIR+CSLLHSNISVK+GSVVMGPWVEGSVVTR+GTWFLTGILGSPPPPGQSQMLLLTAVPR+LTNSEGEDFCAGVLLQEDFVLTTAK+MAGCILLLR+NECHLER+QYGGGSPCVSQPCLNNGTCEDHIR+SSQSQPSFPWQVR+STHVHMR+SYSCTCSPGYEGK+TDGCQHFCHPGQSSYMCSCAK+YDEESGENDVSLLQLEEPLQCPSSGLPVCVPER+YSMWFK	1	.
IPI00133257	Cd34	isoform long of hematopoietic progenitor cell antigen cd34.	40983	Q64314-1,	0.98	2	GEDLIQILCEK+HQSDLRKLGIQSFNK	2	IPI00222348;
IPI00133284	D10Jhu81e	es1 protein homolog, mitochondrial.	28090	Q9D172,	1	9	GGAEVQIFAPDVPQMHVIDHTK+GVEVTVGHEQEEGGK+GVTEAHVDQK+ITSLAQLNAANHDAAIFPGGFGAAK+NLSTFAVDGK+VALVLSGCGVYDGTEIHEASAILVHLSR+WPYAGTAEAIK	1	.
IPI00133338	3110001A13Rik	protein fam107b.	15572	Q3TGF2,	1	3	ELLMNQK+LEQLELEK+LQEEQENAPEFVK	1	.
IPI00133349	Carhsp1	calcium-regulated heat stable protein 1.	16062	Q9CR86,	1	3	GHGFITPADGGPDIFLHISDVEGEYVPVEGDEVTYK+LQAVEVVITHLAPGTK	1	.
IPI00133392	Myl3	myosin light chain 3.	22422	P09542,	1	8	AAPAPAAAPAAAPAAAPEPERPK+ALGQNPTQAEVLR+EGNGTVMGAELR+IEFTPEQIEEFK+LMAGQEDSNGCINYEAFVK	1	.
IPI00133411	2010309E21Rik	protein fam136a.	15674	Q9CR98,	1	3	CHAPLAQAQALVTSELER+CSANCCEDTQASMQQVHQCIER+VQEAVDAMVK	1	.
IPI00133418	Scg2	secretogranin-2.	70644	Q03517,	1	5	EESSPDYNPYQGVSVPLQLK+ENGEESHLAESSR+RVPSPVSSEDDLQEEEQLEQAIK+TNEIVEEQYTPQSLATLESVFQELGK+TNNIAYEDVVGGEDWSPIEEK+VLEYLNQEQAEQGR	2	IPI00608095;
IPI00133456	Rgn	regucalcin.	33407	Q64374,	1	47	DGLNAEGLLR+HQGSLYSLFPDHSVK+TTSCCFGGK+VAVDAPVSSVALR+WDTVSNQVQR+YFAGTMAEETAPAVLER	1	.
IPI00133500	Lcat	phosphatidylcholine-sterol acyltransferase.	49765	P16301,	1	48	ILASGDNQGIPILSNIK+LAPHQQDEYYK+SPAASPSPPPPE+STELCGQWQGR+TESVEYVDDNK+VSNAPGVQIR	1	.
IPI00133536	Gpx3	glutathione peroxidase 3.	25377	P46412,	1	517	FLVGPDGIPVMR+FYTFLK+LFWEPMK+MDILSYMR+NSCPPTAELLGSPGR+QEPGENSEILPSLK+TDCHGGMSGTIYEYGALTIDGEEYIPFK+WNFEKFLVGPDGIPVMR+YVRPGGGFVPNFQLFEK	2	IPI00845541;
IPI00133541	Rnase1	ribonuclease pancreatic.	16820	P00683,	1	14	HIIVACEGNPYVPVHFDATV+QHMDPDGSSINSPTYCNQMMK+QHMDPDGSSINSPTYCNQMMKR+SSSALHITDCHLK+YPNCDYK	2	IPI00331200;
IPI00133544	OTTMUSG00000022462	pancreatic alpha-amylase.	57417	P00688,	1	33	ALVFVDNHDNQR+AVLDKLHNLNTK+CNGEIDNYNDAYQVR+DQNDWIGPPNNNGVTK+EVTINADTTCGNDWVCEHR+GFIVFNNDDWALSATLQTGLPAGTYCDVISGDK+IYVDAVINHMCGAGNPAGTSSTCGSYLNPNNR+LTGLLDLALEK+MAVGFMLAHPYGFTR+NWGEGWGLVPSDR+SGNEDEFR+TAIVHLFEWR+VADYMNHLIDIGVAGFR+WFSQGSRPFIFQEVIDLGGEAIK+YQPISYK	2	IPI00775996;
IPI00133547	Cst6	putative uncharacterized protein.	16796	.	1	36	AAQAAVASYNMGSDSLYYFR+CNFELLEVPWK+MERPHFPLAMGLGLLAFCLLTLSPDAR+QNLSPTDPR+VSGEHMDLTTCPLAAGGQQEK+YYLTLDIESTECR	1	.
IPI00133557	Tppp3	tubulin polymerization-promoting protein family member 3.	18965	Q9CRB6,	1	5	AVTGTDVDIVFSK+EEAFDAICQLIAGK+KFAIHGDPKASGQEMNGK+QDILDDSGYVSAYK+VINYEEFKK	1	.
IPI00133589	Hmbs	isoform 1 of porphobilinogen deaminase.	39302	P22907-1,	0.98	1	GAQLAAENLGISLASLLLNK	5	IPI00230382;IPI00408022;IPI00668725;IPI00877259;
IPI00133751	Mfap4	isoform 1 of microfibril-associated glycoprotein 4.	28938	Q9D1H9-1,	1	8	ADGEYWLGLQNLHLLTLK+RTEMKIR	1	.
IPI00133798	Necap2	adaptin ear-binding coat-associated protein 2.	28598	Q9D1J1,	1	3	ASEWQLDQPSWSGR+TSGELFAQAPVDQFPGTAVESVTDSSR	2	IPI00882125;
IPI00133886	Cuta	divalent cation tolerant protein cuta isoform 2.	16453	.	0.96	6	TQSSLVPALTEFVR	2	IPI00461933;
IPI00133948	Fkbp2	fk506-binding protein 2.	15344	P45878,	1	6	GWDQGLLGMCEGEK+LEDGTEFDSSLPQNQPFVFSLGTGQVIK+LSWILTILSICLSALAAATGAEGKR+LVIPSELGYGER	1	.
IPI00133977	Nap1l4	bone marrow stroma cell crl-2028 sr-4987 cdna, riken full-lengthenriched library, clone:g430136p17 product:nucleosome assembly protein1-like 4, full insert sequence.	47362	.	1	24	EAATVEELNPK+FYEEVHDLER+LDNVSHTPSSYIETLPK+LTDQVMQNPQVLAALQER+QVPNESFFNFFSPLK+YAALYQPLFDK	2	IPI00876202;
IPI00134018	2410004B18Rik	uncharacterized protein c1orf52 homolog.	20101	Q9CWU4,	0.91	41	LLPEGEETVESDDDK+WSNIYEDNGDDAPQNAKK	1	.
IPI00134093	Bsn	isoform 1 of protein bassoon.	418746	O88737-1,	1	24	ADTQAQPQMQGR+ASGAGGPPRPELPAGVAR+EAGPRPPGSGPGPGPTPGAK+EAPVAPAPGPAPAPPPGQKPAGEAAAGSGSGVLSRPASEK+ISKFSPIEEAK+LEPLGPGGVSGRPGK+LSSHDYSSR+LTEAVSAFGK+QAELDEEEKEIDAK+QASATAPGR+QFLNAESAYMDPMK+QTPSGTASR+RAAKPHAR+SATTVPSGLGAGEQTQEGLTGK+SGSEYNLPAFMSLYSPTETPSGSSTTPSSGRPLK	2	IPI00461199;
IPI00134095	Birc6	baculoviral iap repeat-containing 6.	529420	.	1	21	ACFGGLFANLIRPGDAK+AFHDMGGVQLICNNMVTSTR+DLNGILLLDTALQTPVSK+EDILCGPVWLASGLDLSGHAGMLTLTSPK+GGELHFLQIGGTCDDIDEADILVDGSLSK+LHTGLLLVQLCGGER+LQVHLSSTCPQIFSELLLK+LSMTDDSK+MAAAAAEASGPSCSSAAAAAGAGAAGVSEWLVLR+NVVSGGYLVLYK+QLLDSGLPSLLVR+SAVQATSPIPAHSLAAFGLFLR+SMVSTIMK+SPATSPISSNSHR	1	.
IPI00134131	Scp2	isoform scpx of non-specific lipid-transfer protein.	59126	P32020-1,	1	6	ADCTITMADSDLLALMTGK+KLEEEGEQFVK+MNPQSAFFQGK	2	IPI00648476;
IPI00134135	Acp1	isoform 1 of low molecular weight phosphotyrosine protein phosphatase.	18192	Q9D358-1,	1	47	AKIELLGSYDPQK+EDFATFDYILCMDESNLR+IDSAATSTYEVGNPPDYR+IELLGSYDPQK+KLVTDEK+QLIIEDPYYGNDSDFEVVYQQCLR+SPIAEAVFR	1	.
IPI00134484	Timm10	mitochondrial import inner membrane translocase subunit tim13.	10458	P62075,	1	8	CIGKPGGSLDNSEQK+MDSGFGSDFGGTGGGK+VQIAVANAQELLQR+YMDAWNTVSR	1	.
IPI00134505	Eln	elastin.	71954	P54320,	0.96	15	YGAAGGLGGPGGLGGPGGLGGPGGLGGAGVPGR+YGAAGGLVPGGPGVR+YGAGGAGVLPGVGGGGIPGGAGAIPGIGGIAGAGTPAAAAAAK	2	IPI00314186;
IPI00134514	Orm3	alpha-1-acid glycoprotein 3.	24069	Q63805,	0.82	4	AVTHVGMDESEIIFVDWK+AVTHVGMDESEIIFVDWKK+DDHCVYNSNLLGFQR+RPDIPPELR	1	.
IPI00134652	Col7a1	collagen alpha-1(vii) chain.	295232	Q63870,	0.87	18	AGGPGDPGEDGQKGAPGLK+DGLPGLPGPPGPPGPK+GAKGDMGERGPR+GDPGAGLPGPR+GDSAVIEGPPGPR+GEPGEPGQITGGGGPGFPGKK+GEPGIGVQGPPGPSGPPGMK+GEPGPVGAPGQVVVGPPGAK+GEPGVTGLQGQAGPPGPPGLPGRTGAPGPQGPPGSTQAK+GPPGPPGLAGEPGKPGIPGLPGR+KGDMGEPGLPGQSGAPGK+LVDAGIESR+TDPLGPVR+VCTTAGGVPVTLPSDDTPSGPR+YLLASNAPGRR	1	.
IPI00134704	Cryz	quinone oxidoreductase.	35269	P47199,	1	21	AAQAHEDIIHGSGK+AGESVLVHGASGGVGLATCQIAR+ARAGESVLVHGASGGVGLATCQIARAHGLK+EEFQQFAGLLQAGIEK+GVDVIIEMLANENLSNDLK+GWVKPVIGSEYPLEK+KPALPYTPGSDVAGIIESVGDK+LQSDVVVPVPQSHQVLIK+VFEFGGPEVLK+VLGTAGSEEGKK	1	.
IPI00134743	Alpl	alkaline phosphatase, tissue-nonspecific isozyme.	57455	P09242,	1	10	ANEGTVGVSAATER+CNTTQGNEVTSILR+DIDVIMGGGRK+HETHGGEDVAVFAK+LDGLDLISIWK+NVIMFLGDGMGVSTVTAAR+TDVEYELDEK+TYNTNAQVPDSAGTATAYLCGVK	2	IPI00877320;
IPI00134746	Ass1	argininosuccinate synthase.	46584	P16460,	1	14	APNSPDVLEIEFK+APNSPDVLEIEFKK+EQGYDVIAYLANIGQK+FELTCYSLAPQIK+GQVYILGR+IDIVENR+NDLMEYAK+QHGIPIPVTPK+SPWSMDENLMHISYEAGILENPK+VQVSVFK	1	.
IPI00134803	Sox1	sox-1 protein.	39237	P53783,	0.93	4	EMISMYLPAGEGGDPAAAAAAAAQSR+YSLAGGLLAAGAGGGGAAVAMGVGVGVGAAAVGQR	2	IPI00808506;
IPI00134808	C4bp	c4b-binding protein.	51552	P08607,	1	225	AIISCSFSK+GVAWSNPFPECVIVK+HSGTEDFYPYNHGISYTCDPGFR+IICSQPNILHGVIVSGYK+ITLVTYECDK+LTLEVELLQLQIQK+MALEIYK+MMVYCKPSGEWEISVSCAKK+TDFESHTTLK+TMQYVPNSHDVK+TVPVWSSSPPTCEK+YECLPGYGR	2	IPI00331269;
IPI00134961	Acadm	medium-chain specific acyl-coa dehydrogenase, mitochondrial.	46481	P45952,	1	7	EEIIPVAPEYDK+ENVLIGEGAGFK+IYQIYEGTAQIQR+LLVEHQGVSFLLAEMAMK+SGEYPFPLIK+SVSHFECR+TRPTVAAGAVGLAQR	1	.
IPI00135010	Itgax	integrin alpha-x.	129151	Q9QXH4,	0.88	2	GTQIGSYFGASLCSVDMDR+QDIAPSPSQR	4	IPI00379131;IPI00652761;IPI00875147;
IPI00135072	Mga	max-interacting protein.	333137	A2AWL7-1,	0.94	11	EEPLDDYDYELGECPEGITVK+EQQSNSQAEAK+EQQSNSQAEAKK+GHEASSLSLEK+ISPPETQNLASK+KPSSTTSGLIQVASNAK+MDDISPVQTDALDSVR+NIDIMALQSIR+QNSGIIASENTSNNSLDDGGDLLDEETLR+QPGNGKTDQGILVTNR+TLLPSTSNSKMASSGPATNR+VGSFIIELASQR	4	IPI00817009;IPI00875802;IPI00896591;
IPI00135085	Hebp1	heme-binding protein 1.	21053	Q9R257,	1	6	FATVEVTDKPVDEALR+GVGMGMTVPVSFAVFPNEDGSLQKK+IPNQFQGSPPAPSDESVK	1	.
IPI00135122	Zfp518b	zinc finger protein 518b.	118997	.	1	27	GDGGTSECLSTEK+IPTQDLRK+KEDTICSATAKK+NETETISSPVNK+NNYQVVGSMPDDPAQCVFK+QSMELSK+TSETAGATFEGPIISSVFSLSSGSENVPEAIK	1	.
IPI00135184	Ascl2	achaete-scute homolog 2.	27784	O35885,	0.87	2	EGANVHFPPHPVPR+EHFSCAAPELVAGAQGLNASLMDGGALPR+LGCSEPTSPR+LMPTSSGVAGACAARR+QHVPHGGANK+RSGATEASSSSAAVARR+SGATEASSSSAAVAR+SGATEASSSSAAVARR	1	.
IPI00135186	Calu	calumenin.	37064	O35887,	1	16	DGFVTVDELK+DIVVQETMEDIDK+EEIVDKYDLFVGSQATDFGEALVR+NADGFIDLEEYIGDMYSHDGNADEPEWVK+QFLMCLSLCTAFALSKPTEKK+SFDQLTPEESK	1	.
IPI00135231	Idh1	0 day neonate lung cdna, riken full-length enriched library,clone:e030024j03 product:isocitrate dehydrogenase 1 (nadp+), soluble,full insert sequence.	47545	O88844,	1	5	IIWELIK+KIQGGSVVEMQGDEMTR+LDNNTELSFFAK+SDYLNTFEFMDK+VTYMVHDFEEGGGVAMGMYNQDK	2	IPI00762452;
IPI00135379	Myo9b	isoform 1 of myosin-ixb.	238834	Q9QY06-1,	1	6	ALLCSVCK+ASVPIVLEK+DEGLEVGPPEVLDTLSQLLK+DVLKITTCVEMLIKEQMR+FIQVNYLENGIVR+KELCFDDELVLQQLRYTGMLETVR+KVGQITVSEK+LEPHVFALADVAYYAMLR+NMDYMRPDIVALLRGSDSSYVR+SELGAEPGHFGVCVDSLTSDK+TILGAGPVLEAFGNAK+VGQITVSEK+YTGMLETVR	3	IPI00229766;IPI00319697;
IPI00135512	Cnpy2	protein canopy homolog 2.	20767	Q9QXT0,	0.99	4	INPDGSQSVVEVPYAR+SEAHLTELLEEVCDR	1	.
IPI00135547	Saa4	serum amyloid a-4 protein.	15088	P31532,	1	88	DNLEANYQNADQYFYAR+EAVQGTWDLWR+GNYEAQQR+KYFQGLLNR+NHGLETLQATQK+NPNHFRPEGLPEK+NPNHFRPEGLPEKF+YFQGLLNR+YYFGIR	1	.
IPI00135563	Ncan	neurocan core protein.	137200	P55066,	0.81	6	AALAELVALPCFFTLQPR+CGGPAPGVRTVYRFANR+KGTVLCGPPPAVENASLVGVR+YALTFAEAQEACR	1	.
IPI00135604	Pcsk1n	prosaas.	27270	Q9QXV0,	0.99	27	GEAAGAVQELAR+ILTGSSEPEAAPAPR	1	.
IPI00135635	Serpina3m	serine protease inhibitor a3m.	47004	Q03734,	1	2629	ALYQTEAFTADFQKPTEAK+AVLDVAETGTEAAAATGFIFGFR+DEELSCSVLELK+DILPELGIK+DLQILAEFHEK+DLSVSQVVHK+FSISTDYNLK+GNTLEEILEGLK+HFRDEELSCSVLELK+IGELYLPK+ISFDPQDTFESEFYLDEK+ISFDPQDTFESEFYLDEKR+KIGELYLPK+LSQPEDQDQINIGNAMFIEK+MQQVEASLQPETLR+MQQVEASLQPETLRK+NIVFSPLSISAALALVSLGAK+NIVFSPLSISAALALVSLGAKGNTLEEILEGLK+NLINDYVSNQTQGMIK+QADLSGITGTK	1	.
IPI00135640	Psmc5	26s protease regulatory subunit 8.	45626	P62196,	0.98	1	MALDGPEQMELEEGK+VPDSTYEMIGGLDK	2	IPI00462789;
IPI00136054	Lsm2	snrnp core protein smx5 isoform 1.	14857	.	0.95	1	YVQLPADEVDTQLLQDAAR	3	IPI00461314;IPI00876050;
IPI00136164	Gp1ba	platelet glycoprotein ib alpha chain.	80055	O35930,	1	18	CANLDNAPVYSYPGK+ELPSGLLDGLEDLDTLYLQR+LENLDLSHNNLK+LGSLSPGVLDGLSQLQELYLQNNDLK+MALLILLFLLPSPLHSQHTCSISK+SLPPGLLLPTTK+VTSLLEVNCENK+VTSLLEVNCENKK	1	.
IPI00136178	Maged1	melanoma-associated antigen d1.	85670	Q9QYH6,	0.97	1	KSEMAFK+LGLLLVILGIIFMNGNR+MADVGTSAGISEADGAAAQTSADGSQTQNVESR+VPGADAQTQNVNQAK	1	.
IPI00136207	Polr2a	dna-directed rna polymerase ii subunit rpb1.	217176	P08775,	0.93	14	HVNEDSQEKK+IRIMNSDENK+LGGLMDPR+LTHVYDLCK+LTMEQIAEK+QAQENATLLFNIHLR+SMESVMVK+VYMHLPQTDNKK	2	IPI00625592;
IPI00136221	Rhobtb3	rho-related btb domain-containing protein 3.	69231	Q9CTN4,	0.86	8	ASNSVPVIIAAVGTR+RASNSVPVIIAAVGTR+YFGGVLEYFMIQALNQKTSEKMK	3	IPI00459126;IPI00653373;
IPI00136222	5430402E10Rik	6 days neonate head cdna, riken full-length enriched library,clone:5430402e10 product:similar to odorant-binding protein 1f.	19470	.	1	36	AYFEHMECNDDCGTLK+ENIQHLAPTDTCNQ	2	IPI00463017;
IPI00136226	5430401F13Rik	6 days neonate head cdna, riken full-length enriched library,clone:5430401f13 product:hypothetical glycine-rich region containingprotein, full insert sequence.	18978	.	0.89	1	NHFQDQISQHGK	1	.
IPI00136266	Apoc2	apolipoprotein c-ii.	10741	Q05020,	1	211	LRDMYSK+SSAAMSTYAGIFTDQLLTLLR+TYPISMDEK	1	.
IPI00136556	Tcn2	transcobalamin-2.	47586	O88968,	1	20	ANCEFFGSR+APDTPLLQGIADYKPQDGETIELR+IDSQLVEK+LSGGSLALYLLALR+LSSEQLNPSVFVGLR+TYLDLIFPDCQASR	1	.
IPI00136642	Serpinc1	antithrombin-iii.	52004	P32261,	1	2737	AFLEVNEEGSEAAASTSVVITGR+ANRPFLVLIR+ANRPFLVLIREVALNTIIFMGR+ATEEDGSEQK+ATEEDGSEQKVPEATNR+DDLYVSDAFHK+DIPVNPLCIYR+EQLQDMGLIDLFSPEK+EVALNTIIFMGR+FATNFYQHLADSK+FATNFYQHLADSKNDNDNIFLSPLSISTAFAMTK+FDTISEK+FRTEDGFSLK+FSPENTR+GDDITMVLILPKPEK+IKDVIPQGAINELTALVLVNTIYFK+KATEEDGSEQK+KATEEDGSEQKVPEATNR+LCLLSLLLIGALGCAICHGNPVDDICIAKPR+LQPLDFK+LQPLDFKENPEQSR+NDNDNIFLSPLSISTAFAMTK+QLMEVFK+QLMEVFKFDTISEK+RVAEGTQVL…	1	.
IPI00136906	Capg	macrophage-capping protein.	39240	P24452,	1	4	EVQGNESDLFMSYFPR+LKPVPIAR+QAALQVADGFISR+YSPNTQVEILPQGR	2	IPI00277930;
IPI00136925	Igj	immunoglobulin j chain.	18014	P01592,	0.95	3	IIPSTEDPNEDIVER	1	.
IPI00136972	Procr	endothelial protein c receptor.	27212	Q64695,	1	16	TAVWVSGSQEPSK+TESGLQIYLTQFESLVK+YELQEFLQDTCVEFLENHITTQNMK	2	IPI00473190;
IPI00137079	Lrriq3	isoform 1 of leucine-rich repeat and iq domain-containing protein 3.	75364	Q14DL3-1,	0.88	49	LNAADQSLVISLNNER+VCIFSNNFLTDIQPLQSCK	1	.
IPI00137177	Ctsa	lysosomal protective protein.	53844	P16675,	0.94	1	YEDTLVVQDFGNIFTR	2	IPI00658539;
IPI00137229	Cnbp	isoform 2 of cellular nucleic acid-binding protein.	18742	P53996-2,	0.94	2	CYSCGEFGHIQK	4	IPI00330767;IPI00454151;IPI00869371;
IPI00137331	Cap1	adenylyl cyclase-associated protein 1.	51575	P40124,	0.97	1	EIGGDVQK+LEAVSHTSDMHCGYGDSPSK	3	IPI00649994;IPI00869430;
IPI00137409	Tkt	transketolase.	67630	P40142,	1	47	FIECYIAEQNMVSIAVGCATR+GHAAPILYAVWAEAGFLPEAELLNLR+ILATPPQEDAPSVDIANIR+ISSDLDGHPVPK+KISSDLDGHPVPK+LAVSQVPR+LGQSDPAPLQHQVDIYQK+NSTFSELFK+SVPMSTVFYPSDGVATEK+TSRPENAIIYSNNEDFQVGQAK	1	.
IPI00137491	Acp5	tartrate-resistant acid phosphatase type 5.	36807	Q05117,	0.96	4	DLGVARTQLSWLK+FQETFEDVFSDR+MPRDLGVARTQLSWLK+WNFPSPYYR	1	.
IPI00137496	Gzmf	granzyme f.	27642	P08883,	0.97	20	DNTSDIMLLK+TMQICAGDPKK+VILGAHNIR+VKPGHVCSVAGWGR	1	.
IPI00137500	Mfap5	microfibrillar-associated protein 5.	18538	Q9QZJ6,	0.91	1	QCVHQSCFTSLR	4	IPI00894900;IPI00895091;IPI00895283;
IPI00137542	Ctse	cathepsin e.	42933	P70269,	0.98	7	AQGQLSEFWR+QFYSVFDR	3	IPI00857372;IPI00884479;
IPI00137599	Sepp1	selenoprotein p.	42659	P70274,	1	538	APEWYIGDQNPMLNSEGK+DDFLIYDR+GCINQLLCK+IAYCEER+KQVSEHIAVYR+LVYHLGLPYSFLTFPYVEEAIK+QEEDGIDVWTLLNGNK+QEEDGIDVWTLLNGNKDDFLIYDR+QVSEHIAVYR+RGCINQLLCK+TAEPSEAHSHHK	1	.
IPI00137694	Hddc2	hd domain-containing protein 2.	22753	Q3SXD3,	0.94	3	NASMATASAEPGS+NVEKPESVSDHMYR	1	.
IPI00137730	Pebp1	phosphatidylethanolamine-binding protein 1.	20830	P70296,	1	107	FKVETFR+GNDISSGTVLSDYVGSGPPSGTGLHR+KYNLGAPVAGTCYQAEWDDYVPK+LYEQLSGK+LYTLVLTDPDAPSR+VDYAGVTVDELGK+VLTPTQVMNRPSSISWDGLDPGK+YNLGAPVAGTCYQAEWDDYVPK+YVWLVYEQEQPLSCDEPILSNK	1	.
IPI00137736	Rps28	40s ribosomal protein s28.	7841	P62858,	0.94	1	EGDVLTLLESER	2	IPI00719947;
IPI00137930	Eif1	eukaryotic translation initiation factor 1.	12747	P48024,	1	6	FACNGTVIEHPEYGEVIQLQGDQR+GDDLLPAGTEDYIHIR+TLTTVQGIADDYDK	3	IPI00318464;IPI00761998;
IPI00137938	Col4a3	collagen alpha-3(iv) chain.	161726	Q9QZS0,	0.97	14	CDPGLPGPDGEPGIPEAGCPGPPGPK+DTVGPPGPLGCPGSPGPPGPPGPPGCPGDIVFK+GEPSTSTPDLGPPGPPGPPGQAGPR+GETGLLGAYPGPKGSPGVPGAK+GFDGTPGGPGAK+GFPGPPGSTGPPGPPGLPGLPGPMGMR+GGLDGPPGDPGQPGSPGAK+GHMGDSVIGQK+GSPGCPGEMGKPGRPGEPGIPGAK+GTSGLPGLAGRPGLTGIHGPQGDK+KGDQGPPGPPGFPGPPGPAGPAGPPGYGPQGEPGPK+KGVMGDVGPQGPPGTAGLPGPPGLPGAIIPGPK	1	.
IPI00137987	Azgp1	zinc-alpha-2-glycoprotein.	35256	Q64726,	1	489	AEPVGPWSQVEGMEDWEK+AREEIFLVTLK+AYLEEECPEMLK+AYLEEECPEMLKR+CLAYGFYPQR+DENNVVAQPQ+DIMDYYK+DTTGSHTFQGMFGCEITNNR+EEIFLVTLK+EIPAWIPLDPAAANTK+FQATAFLNDQAFFHYNSNSGK+GFSQSLSVQWDR+IDPPTVTITSR+IDPPTVTITSRVIPGGNR+ISLHWNK+KVKDENNVVAQPQ+LAFEPER+SHLDRIDPPTVTITSR+VKDENNVVAQPQ+YAYDGEDFIEFNK	2	IPI00877275;
IPI00138068	Nav3	neuron navigator 3.	253031	Q80TN7,	0.98	15	AHSENEGTSLPPADSCTSPTK+DSMEEVHGSSLSLVSSTSSLYSTAEEK+EGLQMYGK+ESLIPSSSGIPKPGSK+EWLRSHSTGGLQDTGNQSPLVSPSAMSSSATGK+KPSGVGASTMITSSGATITSGSATLGK+LEALSSAHHLDQIR+LGQACPRLQAGDAPSMGAGYSRSGTSR+LQAGDAPSMGAGYSR+QANQEEGK+RKLIEMEIER+SASAPNTEGAK+STLSESMQLDR+YPDIASPTFRR	1	.
IPI00138069	Col11a2	isoform 7 of collagen alpha-2(xi) chain.	162072	Q64739-1,	1	62	AGLPGSDGPPGPPGTSLMLPFR+DDVTQFSYVDSEGSPVGVVQLTFLR+GANEDELSPETSPYVK+GDPGAVGAPGKTGPVGPAGLAGKPGPDGLR+GEPGESGSPGVQGEPGVK+GETGDGGPMGPPGPPGPR+GETGIPGASGPIGPGGPPGLPGPSGPK+GGVLLGPVCFMG+GMDGPHGPK+GSLGFPGFPGASGEK+LCHPELPDGEYWVDPNQGCAR+LLLFLPLVLGLSAAPGWAGAPSVDVLR+LLSVSAHQDVSYPCSGVSQDGPLK+QGEKGAKGDPGAVGAPGK+QLFPGGFPKDFSLLTVVR+RPAGTQDSPAR+TPVLEQLPVLDASFADLGAPTR+VFCNFTAGGETCVTPR	7	IPI00283627;IPI00283629;IPI00466773;IPI00466863;IPI00469449;IPI00626876;
IPI00138180	Cdh5	cadherin-5.	87903	P55284,	1	10	ELDRETYAWYNLTVEANELDSR+GNEYFSIDNSGLIFTK+IFGVDANTGNVLAYER+LAPGLHGGPR+LVVQISATDK+NLEQPSSFTVK+RDWIWNQMHIDEEK+YEYLSSTSGK+YVLQGEFAGK	1	.
IPI00138238	H2-Ke2	prefoldin subunit 6.	14455	Q03958,	1	6	EELALLDGSNVVFK+ETLAQLQQEFQR+LDYITAEIK+LEAQLTENNIVK	1	.
IPI00138274	Cryab	alpha-crystallin b chain.	20069	P23927,	0.96	1	APSWIDTGLSEMR+EEKPAVAAAPK+KYRIPADVDPLTITSSLSSDGVLTVNGPR+QDEHGFISR	1	.
IPI00138342	Es1	liver carboxylesterase n.	61172	P23953,	1	1433	AEEVAFWTELPAK+AISESGVVINTNVGK+APEEILAEK+DAGVSTYMYEFR+EGASEEETNLSK+EGYLQIGATTQQAQR+FAPPQPAEPWSFVK+FHSELNISESMIPAVIEK+FWANFAR+ILSDMFSTEK+ISEDCLYLNIYSPADLTK+KSELILDMFGDIFFGIPAVLMSR+LGIWGLFSTGDEHSQGNWAHLDQLAALR+LKAEEVAFWTELPAK+MNEETASLLLR+MNEETASLLLRR+NGNPNGEGLPHWPEYDEK+NGNPNGEGLPHWPEYDEKEGYLQIGATTQQAQR+QEFGWIIPMMLQNLLPEGK+QKTESELLEISGK+RFHSELNISESMIPAVIEK+RPQMVEGDHGDEIFSVFGAPLLK+SELILDMFGDIFFGIPAVLM…	1	.
IPI00138399	4930455B06Rik	hypothetical protein loc223825.	187859	.	0.99	12	DFSLQMGSYSNSSMEK+DMDLQMSFTR+EMLIGSMLDLIK+ENDFYITQSLK+ERIEFLYERSMDALGK+ESDEGDNLWTLLSNPDTHHIGVCALAR+LDQDIMGQILLLYGQCCQILGVSVINK+LLVISILASLGQLCGAGAIGLLK+LQALRQDPCISVQR+RYVELLDR	2	IPI00849560;
IPI00138691	Arpc4	actin-related protein 2/3 complex subunit 4.	19667	P59999,	1	7	AENFFILR+ELLLQPVTISR+HNKPEVEVRSSKELLLQPVTISR+IVAEEFLK+VLIEGSINSVR	1	.
IPI00139301	Krt5	keratin, type ii cytoskeletal 5.	61767	Q922U2,	1	50	FASFIDK+FASFIDKVR+ISLGGACGAGGYGSR+ISYSSGGGSFR+KDVDAAYMNK+LALDVEIATYR+LRSEIDNVK+LRSEIDNVKK+NKYEDEINK+NKYEDEINKR+QLDGVLGERGR+SEIDNVKK+SLDLDSIIAEVK+TEAESWYQTK+TEAESWYQTKYEELQQTAGR+TTAENEFVMLK+VDALMDEINFMK+VELEARVDALMDEINFMK+YEDEINK+YEDEINKR+YEELQQTAGR	2	IPI00470126;
IPI00139378	Ufm1	ubiquitin-fold modifier 1.	9118	P61961,	1	4	FAAEEFKVPAATSAIITNDGIGINPAQTAGNVFLK+VLSVPESTPFTAVLK+VPAATSAIITNDGIGINPAQTAGNVFLK	2	IPI00880407;
IPI00139788	Trf	serotransferrin.	76724	Q921I1,	1	123	ASDTSITWNNLK+AVLTSQETLFGGSDCTGNFCLFK+AVSSFFSGSCVPCADPVAFPK+CAPNNKEEYNGYTGAFR+CDEWSIISEGK+DFASCHLAQAPNHVVVSR+DFQLFSSPLGK+DQYELLCLDNTR+EDLIWEILK+EEYNGYTGAFR+FDEFFSQGCAPGYEK+GTDFQLNQLEGK+GYYAVAVVK+HQTVLDNTEGKNPAEWAK+HTTIFEVLPEK+IECESAETTEDCIEK+KGTDFQLNQLEGK+KPVDQYEDCYLAR+LCQLCPGCGCSSTQPFFGYVGAFK+LLEACTFHK+LYLGHNYVTAIR+NQQEGVCPEGSIDNSPVK+QEDFELLCPDGTR+SAGWVIPIGLLFCK+TAGWNIPMGMLYNR+VAQEHFGK+YLGAEYMQSV…	1	.
IPI00139795	Rplp2	60s acidic ribosomal protein p2.	11651	P99027,	1	25	ILDSVGIEADDDR+ILDSVGIEADDDRLNK+KILDSVGIEADDDR+LASVPAGGAVAVSAAPGSAAPAAGSAPAAAEEK+NIEDVIAQGVGK+YVASYLLAALGGNSSPSAK	1	.
IPI00153234	Pycrl	pyrroline-5-carboxylate reductase 3.	28721	Q9DCC4,	1	4	AATMSAVEAATCR+IAAQTLLGTAK+MAATMSEPR+MAATMSEPRR+MGMPSGLAHR+QVLASAPTDNNLCHFR	1	.
IPI00153258	Serpina10	isoform 1 of protein z-dependent protease inhibitor.	51797	Q8R121-1,	1	424	DEEYWLR+DLGLSQGSFAFIHK+EEEEEEEEKEEGKDEEYWLR+EEGKDEEYWLR+GLINHCIVK+KMEVFFPK+LFDEINPETK+LFSTSADLSELSAMAR+LILVDYVLFK+MEVFFPK+MLLFLGR+TGDYLALEDYLTVDLVETWLQNMK+VLQQSVLEVDER+VNRPFHFIIYEEMSR+VQIENGLNLQALSQAGPLILPALFK+WLTPFDPSFTEADTFHLDK+YEMHELLK	1	.
IPI00153368	Hyi	putative hydroxypyruvate isomerase.	30449	Q8R1F5,	1	3	EGLEQAVLYAK+GDTVEGLSWLR+ITDPQYFLDTPR	1	.
IPI00153373	Cmbl	carboxymethylenebutenolidase homolog.	27902	Q8R1G2,	0.99	1	AVIVVQDIFGWQLPNTR+LEYGGMGHEVQVEHIK	3	IPI00858107;IPI00858234;
IPI00153376	Hopx	homeodomain-only protein.	8282	Q8R1H0,	0.96	3	HPDPTTLCLIAAEAGLTEEQTQK+MSAQTASGPTEDQVEILEYNFNK	1	.
IPI00153463	BC022224	dehydrogenase/reductase sdr family member 11.	28274	Q3U0B3,	0.99	2	ALVQQGLKVVGCAR+LHDKDPGEAAATYEHIK+NIDDGHIININSMCGHR+QELLEAQTHIR+YAVTALTEGLR	1	.
IPI00153809	Cd109	cd109 antigen.	161659	Q8R422,	0.82	2	DGSVSVMDYYEPR+VIHSELQGGTK	1	.
IPI00153903	Clybl	citrate lyase subunit beta-like protein, mitochondrial.	37549	Q8R4N0,	1	5	AVLYVPGNDEK+AVLYVPGNDEKK+EAAAMGFTGK+QAQNIVTLATSIK+QKVVVTAK+QKVVVTAKAFGLQAIDLVYIDFR+QVIHPNQIAVVQEQFTPTPEK+TLEDFDLGTTEK+VDCAVLDCEDGVAENK	2	IPI00874574;
IPI00154044	Oaf	out at first protein homolog.	31524	Q8QZR4,	1	25	ALEQAELPR+ALILGELEK+GQSQFQALCFVTR+GVDSSVFEALPK+LPDSQVIEESLQADSDADSISLDLR+QEDVQFWTER+SYTFDFYVPQK	1	.
IPI00154054	Acat1	acetyl-coa acetyltransferase, mitochondrial.	44816	Q8QZT1,	1	32	EEVKEVYMGNVIQGGEGQAPTR+ENGTITAANASTLNDGAAALVLMTAEAAQR+EVYMGNVIQGGEGQAPTR+EVYMGNVIQGGEGQAPTRQATLGAGLPISTPCTTVNK+FASEITPITISVK+GATPYGGVK+GKPDVVVKEDEEYKR+IAAFADAAVDPIDFPLAPAYAVPK+IHMGNCAENTAK+LGTAAIQGAIEK+MLEIDPQK+QATLGAGLPISTPCTTVNK+QEQDTYALSSYTR+SYASKPTLNEVVIVSAIR+TPIGSFLGSLASQPATK+VNIHGGAVSLGHPIGMSGAR	1	.
IPI00157497	Odz4	isoform 3 of teneurin-4.	314673	Q3UHK6-3,	0.88	15	GAECDVPTNQCIDVACSSHGTCIMGTCICNPGYK+LLLANGMEVALQTEPHLLAGTVNPTVGK+QVTTSGEISLVAGAPSGCDCK+RDYDVLAGR+RSISCPSCNGLADGNK+SISCPSCNGLADGNK+TAVLQGYEIDASK+VDQNGIISTLLGSNDLTSARPLSCDSVMEISQVR	4	IPI00754819;IPI00798441;IPI00798616;
IPI00162831	Angptl6	angiopoietin-related protein 6.	51095	Q8R0Z6,	1	3	AEPDLGAEPAAALGLLAER+SSEATQDSELATLR	1	.
IPI00165807	Pglyrp2	isoform 1 of n-acetylmuramoyl-l-alanine amidase.	57707	Q8VCS0-1,	1	60	AGLLRPDYK+DALPSCAIR+EFTEAFLGCPAIHPR+FHQDVR+NSSTHNSLHQR+QLVLTHCPGNALFNLLR+QNGAALTSAPTLAQQVWEALVLLQK+SQTWSPPGLGTEGCWDQLTAPR+TWPHFTEVEN+VFTLLDPQASR+WDDIGYSFVVGSDGYLYQGR+WGAAPYR	1	.
IPI00165854	Ube2n	ubiquitin-conjugating enzyme e2 n.	17138	P61089,	1	14	LELFLPEEYPMAAPK+LLAEPVPGIK+TNEAQAIETAR+WSPALQIR+YFHVVIAGPQDSPFEGGTFK	2	IPI00850217;
IPI00169543	1810010M01Rik	zymogen granule membrane protein 16.	18210	Q8K0C5,	1	11	ASGTSFNAVPLHPNTVLR+FSHSGNQLDGPITAFR+MLAVALLVLLCASASANSIQSR+TSSYSGEYGGK+YGTVWSDYVGGTQGDLEEIFLHPGESVIQVSGK	1	.
IPI00169568	Mapkapk3	isoform 1 of map kinase-activated protein kinase 3.	43293	Q3UMW7-1,	1	10	GSLVPPPGALGGSALGGAPAPGVR+GSLVPPPGALGGSALGGAPAPGVRR	4	IPI00405265;IPI00653526;IPI00798611;
IPI00169846	Nckap1l	nck associated protein 1 like.	128905	.	0.98	17	ALAEILGPYGMK+EFVTPDTDIK+ILIGMYNCAHEMLHGHSDPSFAR+LVVEESPFLTLDMLESCFPYVLLR+MTIIGVILSFR+QASSGAIVLSPAMQAFISLPR+QVDNEEK+VMNLIIFHSQMLDSVEK	1	.
IPI00170175	Mfrp	complement c1q tumor necrosis factor-related protein 5.	25437	Q8K479,	0.83	302	DGRDGRDGAPGAPGEK+MRPLLALLLLGLVSGSPPLDDNK	4	IPI00830778;IPI00830936;IPI00831066;
IPI00170205	Alms1	isoform 1 of alstrom syndrome protein 1 homolog.	360238	Q8K4E0-1,	0.84	10	DLAGPSDITVQDR+DLAGPSDITVQDRK+EALFHSARPLPR+EEEWLSESEDGYGSTDSLAAHVK+GRPNSSYQQK+HIQVANHMTSSDSVSSPGSLLSLDSALSNEETVR+IIIESHEK+IPLPTTFHGSSDQK+KADILTASSR+KTGAQIVSSSR+MIIPMMTIIK+SDTTVESSHSGSNDAIAPDFPPQMLGTR+SPLDLQVAQSSLPDSK+VQTPGAPAGPSSSHFHK+YLLQCETSLNQAK+YPSPSCPEIASR	1	.
IPI00170268	Plce1	isoform 1 of 1-phosphatidylinositol-4,5-bisphosphate phosphodiesteraseepsilon-1.	255020	Q8K4S1-1,	0.99	13	CYHISSLNENAAKR+DSVTEDPCLQPGIPSPLER+EEKPVGALSSSDTVGYQQ+ELCEVLDGASGLLK+GESGEVTDDEMATR+GSCEGMRHTWEESSPLSPSTSLSAIIR+HTWEESSPLSPSTSLSAIIR+IVLKPQQETLEEKSIVFDDK+KADNSSGNK+KMAEIFKSVFGEK+MEENPSGSSMPASLMFNTEER+MEENPSGSSMPASLMFNTEERK+NPSPGMSAK+RGISFASELK+RMEENPSGSSMPASLMFNTEERK+SLEMEEEDSASEGSGSRK	1	.
IPI00170318	Hoxc12	homeobox protein hox-c12.	30345	Q8K5B8,	0.99	11	EPCAEGGGGGLK+EPCAEGGGGGLKR+SASAGDPGSLVSPLNPGGGLSASGAPWYPIHSR	1	.
IPI00171983	Ela1	elastase 1, pancreatic.	28901	.	0.98	9	FLVFASLVLCGHSTEDVPETDARVVGGAEAR+SGCQGDSGGPLHCMVNGQYAVHGVTSFVSSMGCNVAR+VVVGEHNLSQNDGTEQYVNVQK	1	.
IPI00173135	Spp2	secreted phosphoprotein 24.	23136	Q8K1I3,	1	171	DSGDPSTCAFQR+FLNLHR+FLNLHRR+GYSVPTAACR+NDYLLGFLSDESR+RNDYLLGFLSDESR+VNSQSLSPYLFR	1	.
IPI00173140	Slc12a3	solute carrier family 12 member 3.	110694	P59158,	0.91	1	FTISTLMGGDEPPPAACDSSQPSHLTHGSTLYMR+MAELPVTELPGDALCSGR	2	IPI00850558;
IPI00173157	2310003F16Rik	isoform 1 of huntingtin-interacting protein k.	14679	Q9CR41-1,	1	4	EHMGNVVEALIALTN+EIQSSNLETAMSVIGDR	1	.
IPI00187275	Cdv3	isoform 2 of protein cdv3.	24338	Q4VAA2-2,	1	8	AITKDENEWKEFEQR+EDPGDNWEEGGGGSGAEK+REDPGDNWEEGGGGSGAEK+TAPVQAPPAPVTVTETPEPAMPSGVYRPPGAR+VQAMQISEKEDDDNEKR	3	IPI00227808;IPI00889877;
IPI00187434	Dut	dutp protein.	21251	.	0.95	1	AAGYDLFSAYDYTISPMEK	2	IPI00467266;
IPI00187557	Obp1a	10 days neonate head cdna, riken full-length enriched library,clone:5530600l21 product:odorant binding protein ia, full insertsequence.	18469	.	0.97	5	LVDESPENLTFYSENVDR	1	.
IPI00221400	Adh1	alcohol dehydrogenase 1.	39771	P00329,	1	6	GAIFGGFKSKDSVPK+LVADFMAK+VIPLFSPQCGECR	1	.
IPI00221402	Aldoa	fructose-bisphosphate aldolase a.	39356	P05064,	1	150	AAQEEYIK+ADDGRPFPQVIK+ALANSLACQGK+ALQASALK+CPLLKPWALTFSYGR+CQYVTEK+ELSDIAHR+FSNEEIAMATVTALR+GILAADESTGSIAK+GVVPLAGTNGETTTQGLDGLSER+IGEHTPSALAIMENANVLAR+KDGADFAK+KELSDIAHR+LQSIGTENTEENR+LQSIGTENTEENRR+RLQSIGTENTEENR+TVPPAVTGVTFLSGGQSEEEASINLNAINK+VDKGVVPLAGTNGETTTQGLDGLSER+VNPCIGGVILFHETLYQK+YASICQQNGIVPIVEPEILPDGDHDLK+YASICQQNGIVPIVEPEILPDGDHDLKR+YTPSGQSGAAASESLFISNHAY	2	IPI00856379;
IPI00221423	Zc3hav1l	isoform 1 of zinc finger ccch-type antiviral protein 1-like.	32831	Q8BFR1-1,	0.83	6	DGPWDAEAEVAAGEGAGAGSGGGATACR+MADLTLCAFLTK+VMAVSSAR	1	.
IPI00221487	Hamp2	hepcidin antimicrobial peptide 2.	9541	Q80T19,	1	7	DINFPICR+FCCQCCNKPSCGICCEE+QTTELQPLHGEESR+QTTELQPLHGEESRADIAIPMQK+TQAACLLLLLLASLSSTTYLQQQMR	1	.
IPI00221501	Sh3bgrl2	adult male medulla oblongata cdna, riken full-length enriched library,clone:6330583a05 product:sh3bgrl2-like protein, full insert sequence.	13589	.	0.98	3	VFVASCSGFVAIK+YCGDYDSFFESK	2	IPI00874453;
IPI00221547	Tek	endothelial-specific receptor tyrosine kinase.	125800	.	1	119	QQASFLPATLTMTVDR+VPGNLTSVLLSNLVPR	3	IPI00403931;IPI00622082;
IPI00221581	Eif4b	eukaryotic translation initiation factor 4b.	68840	Q8BGD9,	1	23	AASIFGGAKPVDTAAR+EDDASASTSQSSR+EEDCHSPTSKPPKPDQPLK+SILPTAPR+SPPYTAFLGNLPYDVTEDSIK+SPPYTAFLGNLPYDVTEDSIKDFFR+VAAVQPPEEGPSR+VDVADQAQDK+VDVVGATQGQAGSCSR	1	.
IPI00221663	Bpgm	bisphosphoglycerate mutase.	29978	P15327,	1	8	AVGPHQFLGNQEAIQAAIK+FCSWVDQK+HYGALIGLNR+MALNHGEEQVR+SESLKDVLER+SILISAHGNSSR+VCDVPLDQLPR	1	.
IPI00221694	Bola2	isoform 1 of bola-like protein 2.	10215	Q8BGS2-1,	1	3	MELSADYLR+QDLEAEHVEVEDTTLNR	2	IPI00410755;
IPI00221701	Megf9	multiple epidermal growth factor-like domains 9.	62831	Q8BH27,	0.99	3	CLEGYVR+CNQTTGQCDCHVGYQGLHCDTCK+SDSCDVHTGACLNCQENSK	1	.
IPI00221769	Ak3	gtp:amp phosphotransferase mitochondrial.	25426	Q9WTP7,	1	6	AVIMGAPGSGK+AYEAQTEPVLQYYQK+QNMLQGTEIGVLAK+TVGIDDLTGEPLIQR+VYNIEFNPPK	1	.
IPI00221817	Vwa5a	loss of heterozygosity 11 chromosomal region 2 gene a protein homolog.	87143	Q99KC8,	1	11	AFGENAVVQLISLQK+ANDNFTIHR+ANGSWELDEDLTK+CEWELLER+FALQCAVDNISLSWDLPPGLSVK+KAVAWLHDHAGSSIPMLVQAANSLLK+KIVAELQDKMK+LSVNPAVFGV+VIPRPVMAGSSSMR+VPAYDLCSAESANLVLK	1	.
IPI00221889	Ercc6l	dna excision repair protein ercc-6-like.	138854	Q8BHK9,	0.96	6	KGGILADDMGLGK+MIFLMSLLER	1	.
IPI00221890	Car3	carbonic anhydrase 3.	29366	P16015,	1	264	DIKHDPSLQPWSASYDPGSAK+DYWTYHGSFTTPPCEECIVWLLLK+EAPFTHFDPSCLFPACR+EKGEFQILLDALDK+EKGEFQILLDALDKIK+EPMTVSSDQMAK+EWGYASHNGPDHWHELYPIAK+GDNQSPIELHTK+GEFQILLDALDK+GGPLSGPYR+GKEAPFTHFDPSCLFPACR+HDPSLQPWSASYDPGSAK+QFHLHWGSSDDHGSEHTVDGVK+QPDGIAVVGIFLK+SLFSSAENEPPVPLVGNWRPPQPVK+VVFDDTYDR+YAAELHLVHWNPK+YNTFGEALK+YNTFGEALKQPDGIAVVGIFLK	1	.
IPI00221926	Zfp646	zinc finger protein 646.	196805	.	0.99	14	EQHDPVGMEAAFHGDEEHACK+FACSNCSK+GPQAGMAEVGPPGPGK+HFPNLPELARHR+KEQHDPVGMEAAFHGDEEHACKR+MEDMPLSFSCSDCQR+QTHQTGDFSCGACAK+RIHADPR+RSTDPGTEGSPSPVK+SHFQTHRPGEVASAQPFLCCLCGMIFPGR+TFACQDCGK+TGEYQCSLCPRK+THAVEHSQMSGQMEK	1	.
IPI00222037	Mia3	isoform 1 of melanoma inhibitory activity protein 3.	214326	Q8BI84-1,	0.97	26	DIDLGPVMEGGPVGAGDVQK+ELEGLLEDMSIR+ESVIHISK+GLVQPESQSEDAK+KDIDLGPVMEGGPVGAGDVQK	2	IPI00845556;
IPI00222188	Col1a2	collagen alpha-2(i) chain.	129557	Q01149,	1	158	AVLLQGSNDVELVAEGNSR+DYEVDATLK+EMATQLAFMR+FTYSVLVDGCSK+GATGLPGVAGAPGLPGPR+GDGGPPGMTGFPGAAGRTGPPGPSGIAGPPGPPGAAGKEGIR+GEAGAAGPSGPAGPR+GENGIVGPTGSVGAAGPSGPNGPPGPVGSR+GEPGSVGAQGPPGPSGEEGK+GEVGPAGPNGFAGPAGAAGQPGAK+GIPGAVGAPGPAGASGDR+GLPGIAGALGEPGPLGISGPPGAR+GLVGEPGPAGSK+GPPGAVGSPGVNGAPGEAGR+GPSGDPGKPGER+HVWLGETINGGSQFEYNVEGVSSK+LPFLDIAPLDIGGADQEFR+LSHPEWNSDYYWIDPNQGCTMDAIK+NSIAYLDEETGSLNK+RGSPGEAGSAGP…	1	.
IPI00222237	Ccdc126	isoform 1 of coiled-coil domain-containing protein 126.	15590	Q8BIS8-1,	0.95	9	STADVDSGASMAGYADLKR+TIAVLLDDILQR	1	.
IPI00222419	Cycs	cytochrome c, somatic.	11605	P62897,	1	20	ADLIAYLK+ADLIAYLKK+GITWGEDTLMEYLENPK+GITWGEDTLMEYLENPKK+KTGQAAGFSYTDANK+MIFAGIKK+TGPNLHGLFGR+TGQAAGFSYTDANK	2	IPI00265239;
IPI00222430	Dbi	diazepam binding inhibitor isoform 1.	15229	.	1	16	AKWDSWNK+LKTQPTDEEMLFIYSHFK+QATVGDVNTDRPGLLDLK+TQPTDEEMLFIYSHFK+TYVEKVDELK+TYVEKVDELKK	3	IPI00667117;IPI00831604;
IPI00222471	Zfp606	zinc finger protein 606 isoform 1.	91442	.	0.83	12	AFNESSSLIVHLR+LGVLGYGDQLEMYHMNQSTGMR+MHSGEKRFICNQCGR+SFSWSSHLIAHQR	2	IPI00762158;
IPI00222556	S100a9	protein s100-a9.	13049	P31725,	1	25	APSQMER+EGHPDTLSK+LIFACHEK+NEALINDIMEDLDTNQDNQLSFEECMMLMAK+QMVEAQLATFMK+QMVEAQLATFMKK+SITTIIDTFHQYSR	1	.
IPI00222687	Thoc5	tho complex subunit 5 homolog.	78686	Q8BKT7,	0.98	1	QFASLEHGIVPVTSDCQDLFPAK+RRPTLGVQLDDKR+YYSEEAEVDLR	2	IPI00648010;
IPI00222750	Dync2h1	isoform 1 of cytoplasmic dynein 2 heavy chain 1.	492339	Q45VK7-1,	1	8	ASTAAAPLAAWVK+GVGEAGDESIFSVMIDR+IEEHSVMTVK+IMELDPNDGALK+KCQVLWMEGWSDSSMK+NLSEVVNNIVWVR+QNDYVVETSLVGTVMNGLSHLHGCK+RDLVAQGPR+RLEEVLAIR+SEGLPSDDLSIENALVILQSR+SIMMDIR+TVAGGGVETVSNLRAKWDK+TYYHHSMCEQEFPSILAK+VLSFPGGSLLLAGRSGVGR+YMTFLHVYSAISSSK	1	.
IPI00222769	Dlec1	deleted in lung and esophageal cancer 1 isoform 1.	193795	Q8BLA1,	0.81	8	ETAFSIIPEK+FEPENVQSTAKKQLIIR+FGTQISGGDTVTR+LLASMENR+LLELLVFYGPPFPLR+NVGFSVGK+RLQDFAVSPLR+TSVPDVPPALLK+TTLVNGTLLPTR+VSRPFFISQGGASWDSR+WMEHLQVPQRALDR	1	.
IPI00222972	Tbca	tubulin-specific chaperone a.	12758	P48428,	1	19	DLEEAEEYK+DLEEAEEYKEAR+LEAAYTDLQQILESEK+LEAAYTDLQQILESEKDLEEAEEYK+MKAEDGENYAIK+RLEAAYTDLQQILESEK	1	.
IPI00223070	Dock4	dedicator of cytokinesis protein 4.	226550	P59764,	0.99	21	DRPCSAIYPTPVEPSQR+EVVEMSPLENAIEVLENK+HCSLFVDLGSSELR+LVANNVIITTVLYLSDALRK	1	.
IPI00223092	Hadha	trifunctional enzyme subunit alpha, mitochondrial.	82670	Q8BMS1,	1	9	AGLEQGSDAGYLAESQK+DTTASAVAVGLR+FGGGSVELLK+LTTYAMTVPFVR+MQLLEIITTDK+MVGVPAAFDMMLTGR+NVQQLAILGAGLMGAGIAQVSVDK+TIEYLEEVAVNFAK	1	.
IPI00223231	Qsox1	isoform 1 of sulfhydryl oxidase 1.	82785	Q8BND5-1,	1	238	ADYLALVFER+AHFSPANIVIDSSASR+DCADHFEQMAAASMHQVR+EFNIAGFPTVR+EVTLDLSQYHAVAVR+FFQAFTK+FGVTDFPSCYLLLR+FSVLEGQR+GSPEATPELVMDTLK+IPYSFFK+IYMADLESALHYILR+KEDAVLTEK+LIDALESHR+LNDIDGFFTR+LSGALSEDPHFPK+MEDHQR+MGGASPGQGPPER+NGSGATLPGAGANVQTLR+NGSGATLPGAGANVQTLRMR+RVLNTESDLVNK+SFYTSYLR+SPSNAILWLWTSHNR+SYVQFFFGCR+VLNTESDLVNK+VPVLVESR+YSEAHPQEPADGQEVLQAMR	2	IPI00788412;
IPI00223253	Hnrnpk	isoform 1 of heterogeneous nuclear ribonucleoprotein k.	50976	P61979-1,	1	5	IITITGTQDQIQNAQYLLQNSVK+RPAEDMEEEQAFK+RPAEDMEEEQAFKR+TDYNASVSVPDSSGPER	3	IPI00224575;IPI00890005;
IPI00223457	Efemp1	egf-containing fibulin-like extracellular matrix protein 1.	54953	Q8BPB5,	1	54	CVCPVSNTMCR+CVNHYGGYLCLPK+DIDECDIVPDACK+DIDECDIVPDACKGGMKCVNHYGGYLCLPK+FSCMCPQGYEVVR+GEQCVDIDECTVPPYCHQR+LNCEDIDECR+NPCQDHYVLTSENR+SGNENGEFYLR+SVPSDIFQIQATMIYANTINTFR+TAQIIVNNEHPQQETPAAEASSGATTGTVAAR+TCQDINECETTNECR	1	.
IPI00223492	Tmed2	18-day embryo whole body cdna, riken full-length enriched library,clone:1110032d12 product:coated vesicle membrane protein, full insertsequence.	14305	.	0.81	38	GQDMETEGGGDSWDAHQNK	1	.
IPI00223699	Fras1	extracellular matrix protein fras1.	442476	Q80T14,	0.95	15	ITHSRPQFGEVVLLMNLPADSPAGPAEEGHHLPDGR+KTITEFELK+LAPGSSLSMTVASQHTAIITR+MYTPSLHVNGSLTLGIGSMKPLDFSLLNIQHQDGR+QGDSSSTVSAVCYTVPK+SCVWTFDAYYDMTELIDVCGGSVTADFQVR+SGLCMPTCVPGFSGHSSNENCTDK+SSGPDMDELSGDSNFTMEDINK+VLDSIYFSRR+VLWNPEQNLHSAYK+YTSYNVSEK	1	.
IPI00223757	Akr1b3	aldose reductase.	35732	P45376,	1	17	EVGVALQEK+GIVVTAYSPLGSPDRPWAKPEDPSLLEDPR+MPTLGLGTWK+RQDLFIVSKLWCTFHDK+SPPGQVTEAVKVAIDLGYR+TIGVSNFNPLQIER+YKPAVNQIECHPYLTQEK	1	.
IPI00223769	Cd44	cd44 antigen isoform c.	40263	.	1	25	YAGVFHVEK+YGFIEGNVVIPR	21	IPI00223770;IPI00223771;IPI00223772;IPI00223773;IPI00265503;IPI00265504;IPI00265505;IPI00266152;IPI00266154;IPI00266155;IPI00410802;IPI00466077;IPI00720073;IPI00753669;IPI00756545;IPI00757131;IPI00828592;IPI00828623;IPI00874953;IPI00875240;
IPI00223783	Plin	perilipin.	55596	.	0.91	3	EAHPLVASVCNAYEK+ETAEYAANTR+GVQGASNLAAWSMEPVVRR+ILHLTPAQAVSSTK+IPALQYPPEK+LASGGADLALGSIEK+VLGATLAGCELALGMAK	2	IPI00387480;
IPI00223800	Pcbd1	pterin-4-alpha-carbinolamine dehydratase.	11986	P61458,	0.98	4	AFGFMTR+AVGWNEVEGR+DINLASFIEQVAVSMT+DQLLPNLR+LDHHPEWFNVYNK	1	.
IPI00223805	Ssh2	isoform 1 of protein phosphatase slingshot homolog 2.	158230	Q5SW75-1,	0.85	4	AITELVSPDIIMQSHSENAISVK+EIVTEIESISQGVGQVQLK+ELVSSESPHLK+EMTTSADQIAEVK+HAGDLQQHLQAMFILLRPEDNIR	3	IPI00649165;IPI00656233;
IPI00223875	Asrgl1	l-asparaginase.	33950	Q8C0M9,	0.96	1	GNLAYATSTGGIVNK	2	IPI00875943;
IPI00224009	Abca12	similar to atp-binding cassette, sub-family a, member 12 isoform 2.	292420	.	1	22	AIIELQTGR+CCGSPFYLK+EILNQLASGTHPLLDK+HMENYLITTANHFVQK+IISEEVQNK+IQASDTVEEMETVAEQLYK+KLSTALALIGKPSILLLDEPSSGMDPK+KLSTALALIGKPSILLLDEPSSGMDPKSK+LEGFGLLLK+LVNNIDIIDQLNTLSSLTVNISSCVLYDR+RELCESYPGYTADYAFSWVTLGK+SSNMSLEHLTQRK	2	IPI00624357;
IPI00224184	Psapl1	prosaposin-like 1.	57350	Q8C1C1,	1	11	FVAEYEPVLIESLK+ILPLPYVMQCNR+KGGFCER+LLGMSSQNLDHK+MGTMLCALILWSGLLGAAR+QTLQGLPPQEVCRK+SPEAAEMCNALEHCQR+TPLLGTDQCVMGPSFWCK+VCTVVPEPLVQQCITLVDTYSPELVQLMSK	1	.
IPI00224740	Pfn1	profilin-1.	14957	P62962,	1	70	CYEMASHLR+DSLLQDGEFTMDLR+DSPSVWAAVPGK+EGVHGGLINK+SSFFVNGLTLGGQK+STGGAPTFNVTVTMTAK+TFVSITPAEVGVLVGK+TLVLLMGK	1	.
IPI00225007	1100001G20Rik	wdnm1-like protein.	6792	.	1	5	GDWDCGPEEQCVSIGCSHICTTN	1	.
IPI00225062	Srrm2	isoform 3 of serine/arginine repetitive matrix protein 2.	284989	Q8BTI8-3,	1	60	DRSGSSQSTSR+EELNGSFLNQTEADPSVDMK+GPSPEGSSSSESSPEHAPK+HASSSPESLKPTPAPGSR+HSLSGSSPGMK+IPAASAAAMNLASARTSAIPASVNLADSR+RQPSPQPSPR+RSESSSPR+RSRSASSSPEIR+SPVPSAFSDQSR+VSSPVLETVQQR	4	IPI00785240;IPI00785384;IPI00874854;
IPI00225091	D630042P16Rik	uncharacterized protein c3orf32 homolog.	38544	Q8C3L1,	0.99	68	KLQVPHSSLVK+QVFFPPLEALGR+RCHLCSGSGR	1	.
IPI00225360	Asxl3	similar to hcg2042958.	194408	.	0.94	22	ASTSTSVSSGR+EAAAAAAVAAAASIVSGAMGSPGEGGK+EAAAAAAVAAAASIVSGAMGSPGEGGKAR+EDSLNMEASPTPETK+EHPFVSPVDK+IHKQSSTLNRLETSHTSK+KEESSCPVDGTLDLVVDPDLDGAEMAEASANGEENR+MEGSTGVIIINPNCR+NGVSMMVNK+SPINPIPMSVCSTAMSGAIK+SPSSKPTHIR+SSVLMSVDSANSTISACNISMLK	3	IPI00754530;IPI00885490;
IPI00225503	Dmkn	52 kda protein.	52143	.	1	6	EAASSGIQNALGQGHGEEGGSTLMGSR+GNNQNSGCTNPPPSGSHESFSNSGGSSNDGSR+QIEGSDLSSLQKR	4	IPI00457381;IPI00462055;IPI00890879;
IPI00225522	Suv420h1	isoform 3 of histone-lysine n-methyltransferase suv420h1.	96070	Q3U8K7-3,	0.99	14	ALTRPSMPR+FRQVKPVKHLAK+GRQEELKEVIER+KLEMGSLVLK+LSNGVSAGPGSSSTK+MFATDSGFEILPCNR+NSDSQSVSSNTDADTTQEK+QNHGRGAHSQGDSLPCTYTTR	4	IPI00469844;IPI00844672;IPI00876288;
IPI00225634	Rps12	40s ribosomal protein s12.	14515	.	1	11	DVIEEYFK+KVVGCSCVVVK+LGEWVGLCK+LVEALCAEHQINLIK+QAHLCVLASNCDEPMYVK+VVGCSCVVVK	5	IPI00405659;IPI00463049;IPI00463052;IPI00473415;
IPI00225661	Pyhin1	pyrin and hin domain-containing protein 1.	46887	Q8BV49,	0.88	1	LTNIACNPGDK+QIPGLGDIANK+RGIFVNGVFTVCK	2	IPI00470007;
IPI00225715	Gpld1	glycosylphosphatidylinositol specific phospholipase d1.	93624	O70362,	1	255	AQYVLTSPEASSR+EAHGILEGFQPSGR+ELLTLEEADWK+FGSSLVSVR+FGSVLHLTDLDDDGLDEIIMAAPLR+GIVATFYSHPR+GVFYSTGSWAPESVTFMYQTLER+HDLVISSPFAPGGGK+ITDVTSGLLGGEDGR+IYDNLYGR+LGTSLSSGYVR+LMLAGSSQK+LSGALHVYSFSSD+MAFLTMTLHQGGATR+MYELAPEK+NLNHVSSPSASYTLSVPYAR+NQVVVAAGR+SLLLIGSPTWK+SWMTPCPEEK+TQPALLSTFSGDR+VYGYFLPNR+VYIYNGMYTTLGDMTGK+WYVPVR	1	.
IPI00226180	ENSMUSG00000055956	adult male testis cdna, riken full-length enriched library,clone:4930542a17 product:hypothetical protein, full insert sequence(fragment).	28672	.	0.85	7	EAGPEVGAGLLLRPAHGIWGCLGGK+GSAAASSGEGRR+HDSAPPCAWPGSAPDPALGPASGPASHPAASCEGR+LAIPVGGGATRPK+RHDSAPPCAWPGSAPDPALGPASGPASHPAASCEGRR	1	.
IPI00226318	E330016A19Rik	mammary gland rcb-0527 jyg-mc(b) cdna, riken full-length enrichedlibrary, clone:g930032a02 product:hypothetical protein, full insertsequence.	58194	.	0.93	8	DAQPSAMDAAGATARPAVR+DISEAAETVNK+EGLPIQGWLGTK+EGLPIQGWLGTKVR+ISAPNEFDVMFK+KDISEAAETVNK	3	IPI00404777;IPI00798546;
IPI00226430	Acaa2	3-ketoacyl-coa thiolase, mitochondrial.	41858	Q8BWT1,	1	93	AANEAGYFNEEMAPIEVK+DFSATDLTEFAAR+DGTVTAGNASGVSDGAGAVIIASEDAVK+DMDLIDVNEAFAPQFLSVQK+HNFTPLAR+ITAHLVHELR+KDGTVTAGNASGVSDGAGAVIIASEDAVKK+LCGSGFQSIVSGCQEICSK+LEDTLWAGLTDQHVK+LPMGMTAENLAAK+QTMQVDEHARPQTTLEQLQK+RTPFGAYGGLLK+TNVSGGAIALGHPLGGSGSR+TPFGAYGGLLK+VGVPTETGALTLNR+VPPETIDSVIVGNVMQSSSDAAYLAR+VVGYFVSGCDPTIMGIGPVPAINGALK+YALQSQQR	2	IPI00653158;
IPI00226497	4632419I22Rik	4632419i22rik protein.	31865	.	1	17	CGGKTDFFCK+LAIGAPPGWDLEGYSDIQR+NLTWQVISGAGDTIWSLSK+VTTPSTWWPDLFPDICK+YDEGLLFTIR	1	.
IPI00226515	Tagln	transgelin.	22576	P37804,	1	11	AAEDYGVIK+DFTDSQLQEGK+GASQAGMTGYGRPR+LVEWIVVQCGPDVGRPDR+TDMFQTVDLYEGK+TLMALGSLAVTK+VPENPPSMVFK	1	.
IPI00226564	C330027C09Rik	protein kiaa1524.	102112	Q8BWY9,	1	46	CTTLIEQQFTYGKIDLGFGTK+EDKQETIDILR+EQNLDETLVR+ISPETVNLSI+KNTDLQTTCESLNK+QLVPGMEVSFYK+TLTLMNK+YEHFSSCLSQVLGLLNAK	1	.
IPI00226610	Cldn17	claudin-17.	24653	Q8BXA6,	0.94	13	ALMCVAVALALVALIIGICGMK+DFYDPTVHAGQK+ELGGALFLGWATAAVLFIGGGLLCGYCCCNR+VSAFIGSNIIIFER	1	.
IPI00226750	Tbc1d4	isoform 2 of tbc1 domain family member 4.	140460	Q8BYJ6-2,	0.97	5	CSSVTGVMQK+CVPAPGAGVGGGAGSGAVQPNTGVFIFEHK+EVGYCQGISFVAGVLLLHMSEEQAFEMLK+FLMYDLGFRK+QSSSEQCSDGEGRK+QYRPDMMSLQIQMYQLSR+RTTLPMLPWLMAEIR+RTTLPMLPWLMAEIRR+STLPDMNTTEMEK+TTLPMLPWLMAEIR	2	IPI00761281;
IPI00226895	C030046E11Rik	c030046e11rik protein.	8966	.	0.95	72	EEHCAPALNLEMK+EEHCAPALNLEMKK	4	IPI00469384;IPI00653124;IPI00885702;
IPI00226993	Txn1	thioredoxin.	11675	P10639,	1	74	CMPTFQFYK+EAFQEALAAAGDK+EKLEASITEYA+MIKPFFHSLCDK+VGEFSGANK	1	.
IPI00227163	Il18bp	isoform 2 of interleukin-18-binding protein.	21668	Q9Z0M9-2,	1	56	ALVLEELSPTLR+DPCSSWSPAVPTK+QYPALDVIWPEK	2	IPI00230322;
IPI00227299	Vim	vimentin.	53688	P20152,	0.91	1	DNLAEDIMRLR+FADLSEAANR+ILLAELEQLK+KVESLQEEIAFLKK+RMFGGSGTSSRPSSNR+TYSLGSALRPSTSR	1	.
IPI00227392	Ywhah	14-3-3 protein eta.	28212	P68510,	1	4	AVTELNEPLSNEDR+DSTLIMQLLR+ELETVCNDVLALLDK+NLLSVAYK+TMADGNEKK+YDDMASAMK	1	.
IPI00227659	ENSMUSG00000061510	3 days neonate thymus cdna, riken full-length enriched library,clone:a630019b22 product:hypothetical protein, full insert sequence.	10493	.	0.99	50	MCLTQDLSCVLCTHSVPYCR	1	.
IPI00227797	Icosl	isoform 2 of icos ligand.	38914	Q9JHJ8-2,	1	22	GHLSLDSMK+LGLYDVISTLR+NVTPQDTQEFTCR+SPGINVDSSYK+VFMNTATELVK	2	IPI00314681;
IPI00227834	Itih2	inter-alpha-trypsin inhibitor heavy chain h2.	105928	Q61703,	1	137	AGELEVFNGYFVHFFAPENLDPIPK+AHVSFKPTVAQQR+EPGKPEASMEVK+FLHVPDTFEGHFQGVPVISK+FYNQVSTPLLR+IEISTETITLSSGSSTSR+IQPSGGTNINEALLR+IYGNQDTSSQLK+IYGNQDTSSQLKK+LTEVQSIITATSANTELVLETLSQMDDLEEFLSK+LVNNSPLPQSVVFDVQIPK+MLADSPPQDHSCCSGALYYGTK+NVQFNYPQASVTDVTQNNFHNYFGGSEIVVAGK+SLAPTAAIK+TDDQFSVVDFNHNVR+TILDDLR+VQFELHYQEVK	1	.
IPI00227857	Hgfac	hepatocyte growth factor activator.	70568	Q9R098,	1	186	CSSPEVYGADISPNMLCAGYFDCK+DNALSWEYCR+LNKPGVYTR+LTACESLAR+MLHSCTSEGSAYR+MLHSCTSEGSAYRK+SDACQGDSGGPLVCEK+SQFVQPICLPEAGSSFPTGHK+TTDVTQTFGIEK+VANYVDWINDR+VSEGHVEQCGCMEGQAR+WCATTHNYDR+YEYFEVGDHWAR+YVPYTLYSVFNPNNHDLVLIR	1	.
IPI00227926	Sh2d1a	isoform short of sh2 domain-containing protein 1a.	13588	O88890-2,	0.97	1	NLISAFQKPDQGIVTPLQYPVEK	3	IPI00845747;IPI00850670;
IPI00228253	Acat2	acetyl-coa acetyltransferase, cytosolic.	41298	Q8CAY6,	1	11	AGHFDKEIVPVLVSSR+AVCLAAQSIAMGDSTIVVAGGMENMSK+EIVPVLVSSR+ELGLNPEK+GVAALCIGGGMGVAMCVQR+GVAALCIGGGMGVAMCVQRG+ILVTLLHTLER+IVSWSQAGVEPSVMGVGPIPAIK+LKPYFLTDGTGTVTPANASGMNDGAAAVVLMK+QASVGAGIPYSVPAWSCQMICGSGLK+TAIGSFNGALSTVPVHEMGTTVIK+VAPEEVSEVIFGHVLTAGCGQNPTR+VAVLSQNR+VNIDGGAIALGHPLGASGCR	1	.
IPI00228328	Fabp2	fatty acid-binding protein, intestinal.	15126	P55050,	1	11	EVSGNELIQTYTYEGVEAK+KLGAHDNLK+LGAHDNLK+LTITQDGNK+VDRNENYEK	1	.
IPI00228548	Eno3	beta-enolase.	47025	P21550,	1	30	AAVPSGASTGIYEALELR+ACNCLLLK+DATNVGDEGGFAPNILENNEALELLK+FMIELDGTENK+GNPTVEVDLHTAK+HIADLAGNPDLVLPVPAFNVINGGSHAGNK+IGAEVYHHLK+LAMQEFMILPVGASSFK+LAQSNGWGVMVSHR+SGETEDTFIADLVVGLCTGQIK+VNQIGSVTESIQACK+VNQIGSVTESLQACK+VVIGMDVAASEFYR+YDLDFK	1	.
IPI00228583	Mtpn	myotrophin.	12861	P62774,	0.99	12	GPDGLTALEATDNQAIK	1	.
IPI00228647	Slc38a10	isoform 1 of putative sodium-coupled neutral amino acid transporter10.	117194	Q5I012-1,	1	10	EAEQQGGDQAGSK+EAVQPLVGAEAK+GQEEEAEHAGETLGDDPSQPLQPVLGAPR+KEAEQQGGDQAGSK+SGHRGDAEGAMK+WGLITNVVNSIVGVSVLTMPFCFK	4	IPI00649374;IPI00885760;IPI00886114;
IPI00228693	2310035C23Rik	isoform 1 of lish domain and heat repeat-containing protein kiaa1468.	134587	Q148V7-1,	0.93	24	ALNFLVNEFLLK+CLPHIVPNVLLAKREELIPLILCTACLHPEPK+EPSTTSGGGQLNR+MGQLTTSGAMLANVFQRK+QMILTGCVAFAR+QSGTPPGMGAPGIPGASIVGGAGGR+VGPNAEPR	2	IPI00622704;
IPI00228716	Fat4	isoform 1 of protocadherin fat 4.	540343	Q2PZL6-1,	0.96	23	ELASQIVLNISAR+ENILTGTDIIQVSAADNDEGTNGQVR+ESLPSDVVNLVVLSSSPTYPTEVR+IDPESGDLIATK+IVASGGAVTGDTVVNITVK+NVKVGTKLIK+QFRSHTPKFSIQR+TCETVVACLGVLCPQGK+VPNLSLIK+VWGLLSLLPGSAR+YGIVGGNTHQEFR	1	.
IPI00228728	Cdca2	isoform 1 of cell division cycle-associated protein 2.	106366	Q14B71-1,	1	24	EENLENIEPPQGSFANLSLSK+ESECLAPQGSLQGSPVSTDSK+RSLCGSTLTDANSATQPPDCK+SLCGSTLTDANSATQPPDCKR+SPETPMCGSSSPSAK+SPETPMCGSSSPSAKTTATRSPATPVCGSSTPSAK+TTATRSPATPVCGSSTPSAKTFVLR+VTFGEDLSPEVFDESLPANTPLCK	1	.
IPI00228876	Kir3dl2	kir-like receptor 2 kirl2.1.	43483	.	0.88	13	NSSHVWSSPSDPLYLPAK	2	IPI00850443;
IPI00229031	Heg1	7 days neonate cerebellum cdna, riken full-length enriched library,clone:a730017h24 product:hypothetical serine-rich region profilecontaining protein, full insert sequence.	47417	.	1	37	AMPLTEAVFR+ELPEEGTVHTQVAGTWVSR+GVSAALESLPESPSSSR+ITPSQTESGTSLGFLER+LGITSMSVR+QASHPALEPGEPTVLSQK+SDPSIGGGESTGR+SLPVGVDPADETEGFPEHSR+SMLITDTYTNGVPRTLR+TLLPVAGPLSPPGAGHTAPGPGVATR+TSTDAAESSALHPEAGGAGGLTQSSHAAQQPR	1	.
IPI00229259	2310005G13Rik	hypothetical protein loc69457.	32871	.	0.88	11	EMQEAQLR+FSALLAGLAAFIEFLLTK+RSSSLITPQFLSR	1	.
IPI00229308	Fabp6	gastrotropin.	14486	P51162,	1	4	IITEVQQDGQDFTWSQSYSGGNIMSNK+LGLPGDVIER+LVEISTIGDVTYER	1	.
IPI00229407	Nrn1	neuritin.	15353	Q8CFV4,	1	2	LGDSMANYPQGLDDK	2	IPI00880917;
IPI00229424	Sspo	sco-spondin.	535033	Q8CG65,	1	8	ADPVEAPMAGPGPR+AGTEPPAAFGGAECQGPNLDAEFCSLRPCR+AYHPPGPGGHWCPDILTAYQER+AYHPPGPGGHWCPDILTAYQERR+CASGECAPK+CLEAVCGCAPGR+CPPGLLLQDSHCLPLSECPCLVGQK+CPVACGWSPWTPWSPCSQSCNVGIR+DCNMHPCTAQCPGNMVFR+EVSEDLR+FQVSGDGR+HQVPAPGQAGEGTPCTR+NGGAPCPGPSHEK+NSSTLCTDCGGGQDLLPCGQPCR+SCADLWDGVQCLQGPCSPGCR+SCGTGLASR+SCTVSAPPHGSLSCEGPDTQTR+SCVDPPPK+SPTNPPVAFGGSPCEGDR+SRVCSHPPISDGGKPCLGGYQQSRPCR+TCAPCPLTCDDISGQAACPPDRPCSSPG…	1	.
IPI00229475	Jup	junction plakoglobin.	81801	Q02257,	1	17	ALMGSPQLVAAVVR+DDITEPAVCALR+FLAITTDCLQLLAYGNQESK+HLTSRHPEAEMAQNSVR+HPEAEMAQNSVR+HVAAGTQQPYTDGVR+LAEPSQLLK+LIILANGGPQGLVQIMR+LLNDEDPVVVTK+LLNQPNQWPLVK+LLWTTSR+NEGTATYAAAVLFR+SAIVHLINYQDDAELATR+TLVTQNSGVEALIHAILR+VSVELTNSLFK	1	.
IPI00229509	Plec1	isoform plec-1i of plectin-1.	517427	Q9QXS1-16,	1	47	ALQALDELR+AQLEPVASPAK+DDPSGQMLLLLSDAR+DPYTEQTISLFQAMK+DPYTEQTISLFQAMKK+DPYTGEQISLFQAMKK+EEELQQTLQQEQNMLDR+ESYSALMR+KGLVGPELHDR+LLDAQLATGGIVDPR+LTVDEAVRK+NLVDNITGQR+QLAAEEEQRR+QLLSPGTALILLEAQAASGFLLDPVR+QSAEEQAQAQAQAQAAAEK+QVAEEAAR+QVEEEIMALK+QVEVTVHK+QYDIDDAITK+RAQQQAEAER+SMVEEGTGLRLLEAAAQSSK+SSIAGLLLKPTNEK+SSSVGSSSSYPISSAGPR+VQSGSESVIQEYVDLR+YLQDLLAWVEENQRR	11	IPI00230061;IPI00400209;IPI00400214;IPI00400215;IPI00421267;IPI00421268;IPI00421271;IPI00468273;IPI00625928;IPI00626385;
IPI00229510	Ldhb	l-lactate dehydrogenase b chain.	36572	P16125,	0.98	8	GYTNWAIGLSVADLIESMLK+LIASVADDEAAVPNNK+SLADELALVDVLEDK+VIGSGCNLDSAR	1	.
IPI00229517	Lgals1	galectin-1.	14866	P16045,	1	19	DSNNLCLHFNPR+EPAFPFQPGSITEVCITFDQADLTIK+FNAHGDANTIVCNTK+LNMEAINYMAADGDFK+SFVLNLGK	1	.
IPI00229529	Rp1l1	retinitis pigmentosa 1-like 1 protein.	199686	Q8CGM2,	0.95	14	ACATGGEETGK+AFMAHLADATAELR+CPQDMPVPPGSLVAADDVEK+CPQDMPVPPGSLVAADDVEKK+ESASNGSTSSGHSR+EWLGNIPEKPVLMTYEMADENTEVPSDGPEGPK+GELGCLWDK+HQDVKEDSPWVSSGESQGRVGSENTSLDQEGR+LKAPAEAGIGEGAR+TRKLSSVTAR	1	.
IPI00229534	Marcks	myristoylated alanine-rich c-kinase substrate.	29661	P26645,	1	22	AEDGAAPSPSSETPK+ESGEGAEAEGATAEGAK+GEATAERPGEAAVASSPSK+KESGEGAEAEGATAEGAK+LSGFSFKK+VNGDASPAAAEPGAK	1	.
IPI00229829	Serpina11	adult male liver tumor cdna, riken full-length enriched library,clone:c730007j02 product:hypothetical proteinase inhibititor i4,serpin containing protein, full insert sequence.	47298	.	0.95	8	MQQVEAALQPETLR	2	IPI00876542;
IPI00230024	Mll1	isoform 2 of histone-lysine n-methyltransferase hrx.	429362	P55200-2,	0.97	14	APQEPPVKK+CEFCQKPGATVGCCLTSCTSNYHFMCSR+DTDPAPQPSVTRTPRANR+EDSPELNPPPGIDDNR+FHKPEEANEPPLNPHGSAR+FIEDEDYDPPMKIAR+FPARPGTTGGGGGGGR+FSATSCGSSEK+HSTSSIGSMLAQADK+IIQAAINSDGGQPEIKK+KFLNGLEPENIHMMIGSMTIDCLGILNDLSDCEDK+KGSDIQSSSALYPVGR+LLGTPDIGSISHLLIK+MDQGSYVSVLEFSDDIVK+NLLDTYNAELLK+QFIMPVVSAISSR+QFIMPVVSAISSRIIKTPR+QPPPPEPGPEQSK+RAAVALGR+SEEGGAPAPAPAPEPKQVSAPASR+STDGSAHSTAYPGIPK+TPSYSPTQR+WRFPARPGTTGGGG…	2	IPI00315032;
IPI00230034	Ddt	d-dopachrome decarboxylase.	13077	O35215,	1	49	FFPLEAWQIGK+FLTEELSLDQDR+IPAGLENR+LCAATATILDKPEDR+MPFVELETNLPASR+STEPCAHLLVSSIGVVGTAEQNR+VSVTIRPGMTLLMNK	1	.
IPI00230042	Dhfr	dihydrofolate reductase.	21606	P00375,	0.97	1	LIEQPELASK+LLPEYPGVLSEVQEEK	1	.
IPI00230044	Tpm3	isoform 2 of tropomyosin alpha-3 chain.	29021	P21107-2,	1	24	CLSAAEEK+EQAEAEVASLNR+EQAEAEVASLNRR+HIAEEADR+IQLVEEELDR+IQVLQQQADDAEER+KIQVLQQQADDAEER+KLVIIEGDLER+LVIIEGDLER+MAGTTTIEAVK+MEIQEIQLK+MELQEIQLK+MLDQTLLDLNEM+TIDDLEDK	1	.
IPI00230086	Hnrnpd	isoform 2 of heterogeneous nuclear ribonucleoprotein d0.	36377	Q60668-2,	1	2	EYFGGFGEVESIELPMDNK+GFGFVLFK+IFVGGLSPDTPEEK+YHNVGLSK	4	IPI00330958;IPI00336873;IPI00336874;
IPI00230108	Pdia3	protein disulfide-isomerase a3.	56678	P27773,	1	33	ALEQFLQEYFDGNLK+DASVVGFFR+DGEEAGAYDGPR+DLFSDGHSEFLK+DLLTAYYDVDYEK+DPNIVIAK+EATNPPIIQEEKPK+ELNDFISYLQR+EYDDNGEGITIFRPLHLANK+FAHTNIESLVK+FVMQEEFSR+GFPTIYFSPANK+LAPEYEAAATR+LNFAVASR+RLAPEYEAAATR+SEPIPESNEGPVK+TADGIVSHLK+TFSHELSDFGLESTTGEVPVVAIR+YGVSGYPTLK	1	.
IPI00230113	Cyb5	cytochrome b5.	15241	P56395,	1	18	EQAGGDATENFEDVGHSTDAR+FLEEHPGGEEVLR+TYIIGELHPDDR+YYTLEEIQK	1	.
IPI00230124	Fabp3	fatty acid-binding protein, heart.	14819	P11404,	1	96	LILTLTHGSVVSTR+MADAFVGTWK+NFDDYMK+NGDTITIK+NTEINFQLGIEFDEVTADDR+NTEINFQLGIEFDEVTADDRK+QVASMTKPTTIIEK+QVASMTKPTTIIEKNGDTITIK+SLGVGFATR+SLVTLDGGK+WNGQETTLTR	2	IPI00404235;
IPI00230138	Lyn	isoform lyn b of tyrosine-protein kinase lyn.	56285	P25911-2,	0.89	3	HYQKQSDGLCR+KNYIHR+REGFIPSNYVAK+VLEEHGEWWK	3	IPI00649763;IPI00758150;
IPI00230145	Fth1	ferritin heavy chain.	21067	P09528,	1	31	ELGDHVTNLR+IFLQDIK+KPDRDDWESGLNAMECALHLEK+MGAPEAGMAEYLFDK+QINLELYASYVYLSMSCYFDR+QNYHQDAEAAINR+SVNQSLLELHK	1	.
IPI00230185	Gpd1	glycerol-3-phosphate dehydrogenase [nad+], cytoplasmic.	37573	P13707,	0.99	2	KLTEIINTQHENVK+KVCIVGSGNWGSAIAK+NIVAVGAGFCDGLGFGDNTK	1	.
IPI00230204	Got1	aspartate aminotransferase, cytoplasmic.	46232	P05201,	1	21	ESDSVLR+FLFPFFDSAYQGFASGDLEK+HIYLLPSGR+IANDNSLNHEYLPILGLAEFR+IGADFLGR+IVAATLSDPELFK+NLDYVATSIHEAVTK+NTPIYVSSPTWENHNAVFSAAGFK+QVEYLVNEK+TDESQPWVLPVVR+VGGVQSLGGTGALR+VNLGVGAYR	2	IPI00877205;
IPI00230212	Gstm1	glutathione s-transferase mu 1.	25970	P10649,	1	13	ADIVENQVMDTR+LGLDFPNLPYLIDGSHK+MLLEYTDSSYDEK	2	IPI00649135;
IPI00230324	Ihh	indian hedgehog.	49445	P97812,	0.98	1	LLLEESTFHPLGMSGAGS+VLAMGEDGTPTFSDVLIFLDR	1	.
IPI00230342	Shox2	isoform 1 of short stature homeobox protein 2.	34905	P70390-1,	0.89	140	AAGGGGGAGGGGGGGGGGGGGAGGGGAGGGAGGGR+AAGGGGGAGGGGGGGGGGGGGAGGGGAGGGAGGGRSPVRELDMGAAER+SSPAVRAAGGGGGAGGGGGGGGGGGGGAGGGGAGGGAGGGR	2	IPI00625691;
IPI00230395	Anxa1	annexin a1.	38734	P10107,	1	12	CQDLSVNQDLADTDAR+DITSDTSGDFRK+FLENQEQEYVQAVK+GLGTDEDTLIEILTTR+GTDVNVFTTILTSR+GVDEATIIDILTK+TPAQFDADELR	2	IPI00652811;
IPI00230412	Vnn3	vascular non-inflammatory molecule 3.	56263	Q9QZ25,	1	59	DSELVTFDTPFGK+ETIYPYLEDIPDPEVNWIPCR+FGYTPVQER+NIDILESAIK+TESPVSTEEALLLINK+YNLFEPEIQFDFPK+YQYNTNVVFDSK+YVFPQIVLSGSQLALER	1	.
IPI00230427	Mif	macrophage migration inhibitory factor.	12504	P34884,	1	13	LHISPDR+LLCGLLSDR+VYINYYDMNAANVGWNGSTFA	1	.
IPI00230432	Fbln1	isoform c of fibulin-1.	75284	Q08879-2,	0.99	1	AGFYFDGISR+ANADISMEACCTDGNQMANQHR+CLSFECPENYR+CVDVDECSPPAEPCGK+DCSLPYTSESK+DSSCGTGYELTEDNNCK+ITYYHLSFPTNIQVPAVVFR+NCQDIDECVTGIHNCSINETCFNIQGSFR+NVPNCGRGYHLNEEGTRCVDVDECSPPAEPCGK	1	.
IPI00230440	ENSMUSG00000048538	adenosylhomocysteinase.	47688	P50247,	1	6	ALDIAENEMPGLMR+GISEETTTGVHNLYK+KLDEAVAEAHLGK+VADIGLAAWGR+WSSCNIFSTQDHAAAAIAK	1	.
IPI00230447	Treml1	isoform 2 of trem-like transcript 1 protein.	34182	Q8K558-2,	1	9	EGEEAEDEKETYR+VSLLVLPPVPGPR+VWCQFLQEGCHPLVTSAVDR	3	IPI00798539;IPI00856551;
IPI00230470	Ensa	isoform 2 of alpha-endosulfine.	12922	P60840-2,	1	2	EGILPEKAEEAK+NLVTGDHIPTPQDLPQR+YFDSGDYNMAK	2	IPI00409045;
IPI00230576	Krt12	isoform 2 of keratin, type i cytoskeletal 12.	21597	Q64291-2,	0.95	2	GGAGGMGIGMGIAGSSGGGSLCIFSGNDGGLLSGSEK+VSNAQLLLQIDNAR	3	IPI00828816;IPI00849984;
IPI00230582	Slc4a2	isoform c2 of anion exchange protein 2.	118705	P13808-5,	0.83	15	ALLQMVEVAGAAEDDPLR+ALLQMVEVAGAAEDDPLRR+MPAFQEWK+RTGRPFGGLIR+VIGDFGVPIAILIMVLVDYSIEDTYTQK	1	.
IPI00230641	Cast	isoform 2 of calpastatin.	82736	P51125-2,	1	50	AASLGSSQPSRPHVGEAATATK+CGEDEDTVPAEYR+DKDGKPLLPEPEETSK+DKELDDALDELSDSLGQRPPDPDENKPLDDK+GVVPEDAVETLAGSLGTR+KVEEEVINDQALQALSDSLGTR+LSAAISEVVSQTPAPSTHAAAPLPGTEQK+QPDPPSHVSQAEQVK+SLSESELIGELSADFDR+SNDTSQTPPGETVPR	5	IPI00230642;IPI00230645;IPI00409176;IPI00754820;
IPI00230682	Ywhab	isoform long of 14-3-3 protein beta/alpha.	28086	Q9CQV8-1,	0.87	2	DSTLIMQLLR+NLLSVAYK+TAFDEAIAELDTLNEESYK	2	IPI00760000;
IPI00230706	Pgam2	phosphoglycerate mutase 2.	28827	O70250,	1	7	ALPFWNEEIAPK+FLGDEETVR+SFDTPPPPMDEK	1	.
IPI00230707	Ywhag	14-3-3 protein gamma.	28303	P61982,	1	2	ATVVESSEK+DSTLIMQLLR+NLLSVAYK+NVTELNEPLSNEER+TAFDDAIAELDTLNEDSYK	1	.
IPI00230718	C9	complement component 9.	63426	P06683,	1	389	AVEDYIDEFSTK+AVEDYIDEFSTKR+CYPCLNGGTIILLDGQCLCSCPMMFR+DNIIDDVISFIR+EEQEQHYPIPIDCR+EKTSNFNADFALK+FSATEVPEK+FSYFMGK+GMACEIHQK+GVDLNDVK+HCLGFNMDLR+IPLQDDLK+KPWNVVSLIYETK+LLCNGDNDCGDYSDENDCDDDPR+MFVHLR+MLCKPPGLPRR+MSPIYNLIPLK+QGCEPTQECEEIQENCGNDFQCETGR+SCVDVLGDR+SILAFGQFNGK+SSMASGMAITLALAIFALGVNAQMPIPVSR+STFLDDVK+TDFANWASSLANAPALISQR+TENYDEHLEVFK+TFDKTDFANWASSLANAPALISQR+TPFDNEFYNGLCDR+TSNFNADFALK	1	.
IPI00230760	Mb	myoglobin.	17070	P04247,	1	169	GQHAAEIQPLAQSHATK+HGCTVLTALGTILK+HGCTVLTALGTILKK+HSGDFGADAQGAMSK+KGQHAAEIQPLAQSHATK+SEEDMKGSEDLK+THPETLDK+THPETLDKFDK+VEADLAGHGQEVLIGLFK+YKELGFQG+YLEFISEIIIEVLK	1	.
IPI00230766	Pvalb	parvalbumin alpha.	11931	P32848,	1	40	AIGAFAAADSFDHK+AIGAFAAADSFDHKK+FFQMVGLK+IGVEEFSTLVAES+KAIGAFAAADSFDHK+KAIGAFAAADSFDHKK+SGFIEEDELGSILK+SGFIEEDELGSILKGFSSDAR+TLLAAGDKDGDGK	1	.
IPI00230768	S100a8	protein s100-a8.	10295	P27005,	1	19	ALSNLIDVYHNYSNIQGNHHALYK+MVTTECPQFVQNINIENLFR	1	.
IPI00262127	Cd248	endosialin.	81813	Q91V98,	1	19	ELGGNLATPR+GFIWTTGDQDTAFTNWAQPATEGPCPAQR+LAADGHSCEDPCAQAPCEQQCEPGGPQGYSCHCR+LGFRPAEDDPHR+TFLEAWR	1	.
IPI00262319	Madd	map-kinase activating death domain.	176435	Q80U28-11,	0.89	1	HPSSDSVAQTPELLRR	21	IPI00330606;IPI00462397;IPI00471028;IPI00620097;IPI00750832;IPI00751295;IPI00752156;IPI00753693;IPI00756378;IPI00757009;IPI00761754;IPI00807833;IPI00828295;IPI00828390;IPI00828551;IPI00828556;IPI00857052;IPI00874726;IPI00875369;IPI00875878;
IPI00263028	Cdkn2aip	cdkn2a-interacting protein.	59745	Q8BI72,	0.81	1	AVEGKNNSSVER+ILSMAEGIK+QQSGSPKK+SGASLGSVSQLAAK+SSSETASSGLTSK+SVYLGTGCGK	1	.
IPI00263233	Itpr2	inositol 1,4,5-triphosphate receptor 2.	304036	.	1	4	AGEGSMLR+EQNILAQVFGILK+NFCVMQSQIGYDILAEDTITALLHNNRK	5	IPI00556814;IPI00856392;IPI00857120;IPI00896029;
IPI00265219	Abca13	isoform 1 of atp-binding cassette sub-family a member 13.	568897	Q5SSE9-1,	1	18	AHELMQQNSFLASIIFNSSLR+CTCQPLVGVVQQHIRR+DFTMYLGYLR+DYHLFPQIFQHLSK+ETYGQGLTLTLSK+FHPQNLPAGGFK+FLGGMLANLSSCVVLDR+FNIPHDSTPFCLK+GECFGLLGVNGAGK+IPAMTFLSNFTVTEDVK+MATMLGTLSISSTEDSGK+TVVLDEPSSGVDPCSR+VLIIFAENPSLTKDILCAALSCKQGAMR	1	.
IPI00266188	Cfl2	cofilin-2.	18710	P45591,	1	13	AVLFCLSDDKR+HEWQVNGLDDIK+HEWQVNGLDDIKDR+KAVLFCLSDDK+KAVLFCLSDDKR+KEDLVFIFWAPESAPLK+MIYASSK+QILVGDIGDTVEDPYTSFVK+YALYDATYETK	1	.
IPI00266281	Txnl1	thioredoxin-like protein 1.	32237	Q8CDN6,	1	5	IDQYQGADAVGLEEK+ISYFTFIGTPVQATNMNDFKR+MVGVKPVGSDPDFQPELSGAGSRLAVVKFTMR	1	.
IPI00266899	Fkbp1a	peptidyl-prolyl cis-trans isomerase fkbp1a.	11923	P26883,	1	10	GWEEGVAQMSVGQR+RGQTCVVHYTGMLEDGK+RGQTCVVHYTGMLEDGKK	1	.
IPI00268144	Si	putative uncharacterized protein.	66301	.	1	15	EACMDISSPGCQPPAQR+KQGSVSQMPHGSTHWLR+LSIATGHAK+QGSVSQMPHGSTHWLR+QVPLDCVLYR	1	.
IPI00269076	Ak2	adenylate kinase isoenzyme 2, mitochondrial.	25606	Q9WTP6,	1	11	AMVASGSELGK+AVLLGPPGAGK+LAENFCVCHLATGDMLR+LEAYHTQTTPLVEYYR+LVSDEMVVELIEK+NLETPSCK+QAEMLDDLMEK+SYHEEFNPPKEPMKDDITGEPLIR	2	IPI00648318;
IPI00269240	Gfm2	adult retina cdna, riken full-length enriched library,clone:a930009m04 product:similar to elongation factor g2.	83128	.	0.82	1	ATDTLDRVLGDKR+EAESLLLAGVEVPEPVFFCTIEPPSVAK+GVQPLLDAVTTYLPSPEER+NIGIMAHIDAGK+QTATGDTIVSSK+REYGLETYLGPLQVAYR+SLGDVDDGDTVTDFMAQER	2	IPI00338876;
IPI00269661	Hnrnpa3	isoform 1 of heterogeneous nuclear ribonucleoprotein a3.	39652	Q8BG05-1,	1	15	EDSVKPGAHLTVK+GFAFVTFDDHDTVDK+IETIEVMEDR+LFIGGLSFETTDDSLR+WGTLTDCVVMR	20	IPI00269662;IPI00459722;IPI00461800;IPI00466185;IPI00659723;IPI00663550;IPI00667787;IPI00670004;IPI00670681;IPI00674712;IPI00677689;IPI00678360;IPI00749630;IPI00750059;IPI00750428;IPI00752179;IPI00757273;IPI00849556;IPI00849731;
IPI00270149	Spnb4	beta4-spectrin.	288135	.	0.99	25	DLLSWMDGIAGQIGAADKPR+FESLDQEMNSLMGR+KFFGDPTELAAK+MAQVPGEVDNMEGPAVSNNNNPSAR+QCRALLEMGHPDSEQISRR+QLATLGGASGAGPLVVALQVR+QVDELEHWIAEK+QWALLTGLVGAR+SCQDHLNSR+VFQEMVYMVDWMEEMQTQLLSR	2	IPI00856469;
IPI00271166	Htt	huntingtin.	344788	P42859-1,	0.99	12	ALALSCIGAAVALHPESFFSR+AMAALGLMLTCMYTGKEKASPGR+ASDPSPATPDSESVIVAMER+CLVPLLQQQVK+EKEPGEQASTPMSPK+EPGEQASTPMSPK+EPGEQASTPMSPKK+GYSLLPSITDVTMENNLSR+IIQLCDGIMASGRK+KTLQCLEGIHLSQSGAVLTLYVDR+LFEPLVIK+NMVQAEQER+QVADIILPMLAK+RAFQSVFEVVAAPGSPYHR+RLSRQVADIILPMLAK+SGSIVELLAGGGSSCSPVLSRK+SLNPQKSGEEEDSGSAAQLGMCNR+VGDWLGNIR+VLLGEEEALEDDSESR+WWAEVQQTPK	1	.
IPI00271262	Mug2	murinoglobulin-2.	162368	P28666,	0.98	33	ALMAYAFALAGNQDK+ALSCLESSWK+DGSYSAFGDQNGER+EEHSFTVMEFVLPR+EGNTWLTAFVLK+ESVVFVQTDKPVYKPGQSVK+GNFDLEIPVEFSMAPMAK+GPTHEFSK+HGIPFFVK+HTSSWLVTPK+ICFDSAPMSGPR+LQVTASPQSLCGLR+MLIYTILPDGEVIADSVNFEIEK+MLSGFIPLKPTVK+MSLVLPPTVVK+NKESVVFVQTDKPVYKPGQSVK+NLQPAIVK+QMSFSLAAEPIQGPYK+QQNSNGGFSSTQDTVVALDALSK+TENGLKQMSFSLAAEPIQGPYKIVVHK+VLIVEPEGIK+YGAVTFSR+YMVLVPSQLYTETPEK	1	.
IPI00272401	Acyp2	acylphosphatase-2.	10895	P56375,	1	8	GTVTGQVQGPEEK+LEYSDFSIR+SVDYEVFGTVQGVCFR	2	IPI00880375;
IPI00272719	Myo18b	similar to myosin xviiib.	296421	.	0.91	7	CISSEGPEDITLLPDK+EDPAHLSDSSSSSSSIVSFK+RDDDVESIMR+RDDDVESIMRK+SPLGAEGIPGATAGLSR	3	IPI00348944;IPI00605455;
IPI00273133	Flt4	vascular endothelial growth factor receptor 3.	153016	P35917,	1	182	CPVAGAHVPSIVWYK+CPVAGAHVPSIVWYKDER+ESGIDLADSNQR+EVTEASAGVYTLALWNSAAGLR+EVTTQDAVNPIESLDSWTEFVEGK+GPVLEATAGDELVK+GQHPLEWTWPGAQEVLTTGGK+HATLSLNIPR+KYLSVQALEAPR+LAAYPPPEFQWYK+LIYFYVTTIPDGFSIESEPSEDPLEGQSVR+LNLSTLHDAQGNPLLLDCK+LVIQDANVSAMYK+NVHLFATPLEANLEEAEPGAR+RAPLVQEAEDLWLSPLTMEDLVCYSFQVAR+SQSSALHPDGQEVLWDDR+VAPEDEGDYVCEVQDR+VREEDAGR+YLCSVCNAK+YLSVQALEAPR	1	.
IPI00273742	Dnahc1	adult male corpora quadrigemina cdna, riken full-length enrichedlibrary, clone:b230368e05 product:heat shock regulated-1 homolog.	492912	.	1	6	ANLMAAYTGR+EGPSSSSQGPGYCPVK+ERPQTGCYIHGLFLEGAR+ETDTYILK+FGKPCLLENVGEELDPALEPVLLK+FIEPQATNLSAVFK+HGLMLVGPTGSGK+IVNINRYLTFSLYSNVCRSLFEK+KIQLMDQNNFQEK+KIYEKPNSIEELAELR+KLCLSSGEIIK+LASHMAEYECFQIELSK+NMERESGLDVFK+QALGNALLLGVGGSGR+VVAEGCHPNAHVGLALVPNR+WIKNMERESGLDVFK+WYMFDGPVDAVWIENMNTVLDDNK	1	.
IPI00274165	Rtel1	regulator of telomere elongation helicase 1.	125832	.	0.95	41	ICEESASFDLTPR+KVEALKPLFVEPR+MQFLDEMR+QESNHMQISLCRK+RSDAWSTTASR+TLSSWGSAAAASGDSIECYTDIPK	5	IPI00467288;IPI00754466;IPI00756345;IPI00756903;
IPI00275524	Ghr	isoform 2 of growth hormone receptor.	34105	P16882-2,	1	38	GDIQVSWQPPPNADVLK+IAHEWTQEWK+SPELETFSCYWTEGDNPDLK+TPGSIQLYYAK+VIFPQTNILEACEEGTK+VMGPIWLTYCPVYSLR+YSEFSEVLR	1	.
IPI00277001	Psma4	proteasome subunit alpha type-4.	29471	Q9R1P0,	1	22	ATCIGNNSAAAVSMLK+LLDEVFFSEK+LNEDMACSVAGITSDANVLTNELR+QKEVEQLIK+QKEVEQLIKK+TTIFSPEGR+VEIATLTR+YLLQYQEPIPCEQLVTALCDIK	1	.
IPI00278227	Mocs1	molybdenum cofactor synthesis 1 isoform 1.	69859	.	1	3	CLSTGSQAPDAPSGPGPTSNQLTHVDSAGR+GPTGVEMEALTSAAMAALTVYDMCK+LVQQNQLK+QCLSDQMASLWK+QHAGMFNIAQMK+TIGLTTNGINLAR	1	.
IPI00278624	Mcm10	protein mcm10 homolog.	98406	Q0VBD2,	1	6	LEGTATPR+MATENLEETDWVTFGVILRK+NQNTVSPGNSGDRPQQVSQVSVEAFSGLR+RFLQSSSEVQSPAVPSSSR+SSTPSPQAVPGNK	1	.
IPI00279079	Fgb	fibrinogen beta chain.	54753	Q8K0E8,	1	2683	AHYGGFTVQNEASK+CHAANPNGR+DNDGWVTTDPR+DNDGWVTTDPRK+ECEEIIR+EDGGGWWYNR+EEPPSLRPAPPPISGGGYR+ENENVINEYSSILEDQR+GFGNIATNEDAK+GFGNIATNEDAKK+GGETSEMYLIQPDTSIKPYR+GHRPVDR+GSWYSMR+HGTDDGVVWMNWK+IQKLESDISAQMEYCR+IRPFFPQQ+KEEPPSLRPAPPPISGGGYR+KGFGNIATNEDAK+KGFGNIATNEDAKK+KGGETSEMYLIQPDTSIKPYR+KWDPYK+KWDPYKK+KYCGLPGEYWLGNDK+LESDISAQMEYCR+LYIDETVNDNIPLNLR+MGPTELLIEMEDWK+MGPTELLIEMEDWKGDK+QDGSVDFGR+QDGSVDFGRK+…	1	.
IPI00279302	Adamtsl4	adamts-like protein 4.	113225	Q80T21,	1	25	ACSQEPCPPEQPDPR+CLSPGCDGVLGSGR+QEFGGGGSSVPPER+RHWRPPGPHR+RPDGCGVCGGDGSTCR+SGETLQGDPEAGSTEQGCPLR+SPDGWLPLTR	1	.
IPI00281122	Camta2	isoform 5 of calmodulin-binding transcription activator 2.	107857	Q80Y50-5,	0.94	13	FLPSGCASSFGLR+KDGYLWK+KLLECLPR+LPLSVAHSR+RMAEIAAAGQAPGQGPEAPPIQDEGQGPGFEAR+THACLCSGGLGSGSLTHK+VQGMEPVSWQCLYGCYVHSSIVPTFHRR	1	.
IPI00281565	Asxl1	putative polycomb group protein asxl1.	162674	P59598,	0.94	8	DNLACASASPDR+ETATTAIGGGGGPGGGGSGAIDEGGGR+FPLGDLLGGGSDQAFDNMK+GARGYHCNRETATTAIGGGGGPGGGGSGAIDEGGGR+GLAGGVVQLSHK+MPKPPPVSADSIK+SVCPLRPGSSVEVTNPLVMHLLHGNLPLEK	1	.
IPI00282808	Zfp318	zinc finger protein 318 isoform 1.	246324	Q99PP2-1,	0.96	16	DQVVGGNVSPR+ELSPSNSSSSNK+ILSMLADPTITQEKR+KSGSATVSKPAPLNTFLSIK+LIEINLIDNQNK+LQDSIMK+NLGDMHANFHNSQTEQTRR+RASPSPPR+RHYPPGLGGFR+TDTLVMWTSGSSQNDTHK+VHSSGGDHSSFTSGTR+VVIELSPSLPSKR	1	.
IPI00282930	Cilp2	cartilage intermediate layer protein 2.	125934	.	0.98	1	EAGQNVTFCCKASGTPMPK+FAPAEQVQGVVVTLLNLEPAPGFTANPR+HPPLAAADDPAAFAMLAPLDALGHNYGVYTVTDQSPR+LAKEIAIGRCFDGSSDGFSR+RSCQSSSGDTCPGSPQEAQK	1	.
IPI00283862	Psma1	proteasome subunit alpha type-1.	29547	Q9R1P4,	1	34	AQPSQAAEEPAEK+DLEFTIYDDDDVSPFLDGLEERPQR+ETLPAEQDLTTK+FVFDRPLPVSR+HMSEFMECNLDELVK+IHQIEYAMEAVK+KAQPSQAAEEPAEKADEPMEH+LLCNFMR+NQYDNDVTVWSPQGR+QGSATVGLK	1	.
IPI00284505	Celsr3	cadherin egf lag seven-pass g-type receptor 3.	358462	Q91ZI0,	0.97	13	AQIGSGAVALCPESPGVWEDGDPGLGVR+CVPGVCRNGGTCTNAPNGGFR+DVDGNDLLSYWPALGECEAAPCALQAWGSER+EAVPVYELTAYAVDR+GVLVSPINLEFR+GWWGSPTCGPCNCDVHK+MDMAAFVANNGTMAGCQAK+QCNSCDSPFAEVTASGCR+VAVLSVDDCNVAVALQFGAEIGNYSCAAAGVQTSSK+VHITVLDENDNAPQFGEK	1	.
IPI00284816	Col18a1	isoform 1 of collagen alpha-1(xviii) chain.	182172	P39061-3,	1	50	AGQGGSPATPAVPIPLVAPAASPDMK+ASGDFGSGFEESSK+AVGLSGTFR+EDTSLLPGLPQPPPVTSPPLAGGSTTEDPR+EGPPGFPGPPGPPGPPGK+EVPEGWLIFVAEREELYVRVR+GADFQCFQQAR+GPPGPPGPQGPPGIGYEGR+GSVGDVGIPGPKGSKGDLGPIGMPGK+ILNVAQGIR+LMESYCETWR+QDKLTFIDMEGSGFSGDIESLRGPR+QFCEALEDECWNYLAGDR+QTVSVPGPPGPPGPPGPPGAMGASAGQVR+TETTGATGQASSLLSGR+TETTGATGQASSLLSGRLLEQK	1	.
IPI00284925	Chchd2	coiled-coil-helix-coiled-coil-helix domain-containing protein 2,mitochondrial.	15661	Q9D1L0,	1	5	APAAQPPAAAAPSAVGSPAAAPR+LCEGFNEVLR+QFLECAQNQSDVK+RAPAAQPPAAAAPSAVGSPAAAPR	3	IPI00407413;IPI00857097;
IPI00307837	Eef1a1	elongation factor 1-alpha 1.	50114	P10126,	1	23	EHALLAYTLGVK+IGGIGTVPVGR+LPLQDVYK+MDSTEPPYSQK+QLIVGVNK+QTVAVGVIK+RYEEIVK+SGDAAIVDMVPGKPMCVESFSDYPPLGR+STTTGHLIYK+VETGVLKPGMVVTFAPVNVTTEVK+YYVTIIDAPGHR	1	.
IPI00307890	F7	coagulation factor vii.	50276	P70375,	1	10	GATALELMSIEVPR+LMTQDCLEHAK+RTCSCHEDYTLQPDEVSCKPKVEYPCGR+RVTQVIMPDK+TCSCHEDYTLQPDEVSCKPK+VTQVIMPDK+YWGNITVVMGEHDFSEK	1	.
IPI00307988	Rad23a	uv excision repair protein rad23 homolog a.	39770	P54726,	1	35	DQPQFQNMR+EDKSPSEESTTTTSPESISGSVPSSGSSGR+EEDAASTLVTGSEYETMLTEIMSMGYER+NFVVVMVTKAK+QVIQQNPALLPALLQQLGQENPQLLQQISR+SPSEESTTTTSPESISGSVPSSGSSGR	3	IPI00830159;IPI00830250;
IPI00307991	Crk	isoform crk-ii of proto-oncogene c-crk.	33815	Q64010-1,	1	6	ALFDFNGNDEEDLPFK+DSSTSPGDYVLSVSENSR+IGDQEFDSLPALLEFYK	5	IPI00345994;IPI00857937;IPI00858058;IPI00885316;
IPI00308222	Dbnl	isoform 2 of drebrin-like protein.	48428	Q62418-2,	1	4	ESTSFQDVGPQAPVGSVYQK+FVLINWTGEGVNDVR+VAGTGEGGLEELVEELNSGK	3	IPI00378015;IPI00458127;
IPI00308245	Lyve1	lymphatic vessel endothelial hyaluronic acid receptor 1.	34574	Q8BHC0,	1	21	GVLIWNAPSSQK+IMGVALVGR+MLGLTLASR	1	.
IPI00308484	Sparcl1	sparc-like protein 1.	72314	P70663,	1	226	AEKPSALNSEEETHEQSTEQDK+AESSPNAEPSDEGNSR+AGLEAIGNQK+AGLEAIGNQKDTDEK+ASLVPMEHCITR+AVSTEPTDAAVVPR+EEDIDENLLF+EHSAGSCTNFQCK+ESQEQPVSDSHQQPNESSK+EWGHCFGIK+FFEECDPNK+FFEECDPNKDK+GHQLQLDYFGACK+HGAGDDYFIPSQEFLEAER+HQSEQGNQGQESDSEAEGEDK+ILTHSELAPLR+KAESSPNAEPSDEGNSR+KGHQLQLDYFGACK+LLAGDHPIELLLR+MHSLSYYLK+NILMQLYEPNPK+SIPACTDFEVAQFPLR+TDPQGKPHCVCQDPETCPPAK+YGGGEETTTGESENR	1	.
IPI00308545	Caml	calcium signal-modulating cyclophilin ligand.	32542	P49070,	0.84	3	MEPVPAATDGGERPATPSGLSASQR+RVVLGDSVDGGGADQLGGVAEVR+VVLGDSVDGGGADQLGGVAEVR	1	.
IPI00308609	Lman2	putative uncharacterized protein.	40430	.	0.96	2	NLHGDGIALWYTR+TPEEESIDWTK	2	IPI00321634;
IPI00308971	Igf2r	cation-independent mannose-6-phosphate receptor.	273815	Q07113,	0.81	9	EDLLCGAINGK+EDLLCGAINGKK+HQDEAVILSYVNGDPCPPETDDGEPCVFPFIYK+IQTSITFLCGK+LASMQLDYR+STTIYFYCDR+SYDECVLEGRAK+TYSIGVCTAAAGLGQEGCK+WYTSYACPEEPLECMVTDPSMMEQYDLSSLVK+YSDNWEAVTR	1	.
IPI00309091	Kifc2	kinesin-like protein kifc2.	85686	O08672,	0.8	6	GLVSTFTQSCQGSLSEAQGQVSWALGALSAGK+VQHLTLENEALK	1	.
IPI00309199	Prss12	neurotrypsin.	84118	O08762,	0.98	80	CTGNELSIEQCPK+IPAAQRPQVLSTGHTPPTIPR+LLCGATLLSSCWVLTAAHCFK+LQGPGEQCAR+LVGGNSGHEGR+TLQQAAVPLLPK	1	.
IPI00309214	Apcs	serum amyloid p-component.	26247	P12246,	1	71	DNELLIYK+GRDNELLIYK+KVFVFPR+SQSLFSYSVK+VGEYSLYIGQSK	1	.
IPI00309363	Ctla2a	protein ctla-2-alpha.	15883	P12399,	1	27	GEMAPDLPEYEDLGK+RLVWEENK+TSFYMGLNQFSDLTPEEFK	1	.
IPI00309520	Ctss	bone marrow macrophage cdna, riken full-length enriched library,clone:i830001d23 product:cathepsin s, full insert sequence.	38863	.	1	21	CHYNSK+LISLSAQNLVDCSNEEK+NHCGIASYCSYPEI+NSWGLNFGDQGYIR+SGVYDDPSCTGNVNHGVLVVGYGTLDGK+SYSNRTLPDTVDWREK+YIQLPFGDEDALK+YQGSCGACWAFSAVGALEGQLKLK	2	IPI00877231;
IPI00309574	Herc2	isoform 2 of probable e3 ubiquitin-protein ligase herc2.	523462	Q4U2R1-2,	1	10	DDGVDAQSGTK+DDHEELAWPGIMESFFTGQNCR+DEDHCSSPGGTPISK+DGGFWTVIDGK+ETAPVQLPVSGPELAAMMK+FTVYPIMPAAGPK+GNYGRLGHGSSEDEAIPMLVAGLKGLK+IGPISDTSSPELMGVGSLLKK+KETAPVQLPVSGPELAAMMK+KPTLVQGLEGQK+LAASLAACAQLSALAASHR+NNEEVTLIRK+QCLPLVQLIQQLLR+QFEYEDPIVRGGK+QLAGMSLTIADLSEVDK+RCHSSQPGMLLDSWSR+RFLILSR+RPDDWTLSAGGSGTIYGWGHNHR+THQEQGR+VFVWGLNDK+VIQVACGSR	2	IPI00314989;
IPI00309768	Pdlim1	pdz and lim domain protein 1.	35774	O70400,	1	46	AAIANLCIGDLITAIDGEDTSSMTHLEAQNK+DFEQPLAISR+GCADNMTLTVSR+GHFFVEDQIYCEK+HPECYVCTDCGINLK+IWSPLVTEEGK+MNLASEPQEVLHIGSAHNR+QSTSFLVLQEILESDGK+QSTSFLVLQEILESDGKGDPNKPSGFR+SAMPFTASPAPSTR+TSASGEEANSRPVVQPHPSGSLIIDK+VITNQYNSPTGLYSSENISNFNNAVESK+VTPPEGYDVVTVFR+VTPPEGYDVVTVFRE	1	.
IPI00309967	Prdm1	pr domain zinc finger protein 1.	95836	Q60636,	0.82	6	EILAVVR+EVLIPAPHSAFSLTGAAASMK+FQGLAETGIMK+MDMEDADMTLWTEAEFEEK+NMGNGLLSSGCSLYESSDLSLMK+YECNVCAK+YVNPAHSAR	2	IPI00830795;
IPI00310035	Fah	fumarylacetoacetase.	46104	P35505,	1	9	AHEHIFGMVLMNDWSAR+ASLQNLLSASQAR+DIQQWEYVPLGPFLGK+FGEPIPISK+RPMGQMRPDNSKPPVYGACR	2	IPI00653931;
IPI00310059	Pigr	polymeric immunoglobulin receptor.	84999	O70570,	1	7	DLGGNDNMGASPDTQQTVIEGK+EDEGWYWCGVK+ETCDVIINTLGK+GVTGGSVAIACPYNPK+QGASGMCTTLISSNGYLSK+SSVTFECDLGR+VALEEEVVDSSISEKENK	1	.
IPI00310173	Msh6	muts homolog 6.	151084	.	0.95	35	ASSSAQAVPPSSCDFSPGDLVWAK+GGHFYSSK+IHNVGSPLK+LGHMACMVENECEDPSQETITFLYK+NLPEEYELK+QGAAASGASASR+VEQTETPEMMEAR	2	IPI00323790;
IPI00310797	Fgl2	fibroleukin.	48951	P12804,	1	9	CEGSQCPFQLTLPTLTIQLPR+NSSFEVYCDMETMGGGWTVLQAR+QLGSMEEVLK	1	.
IPI00311147	C1qb	complement c1q subcomponent subunit b.	26816	P14106,	1	209	GNLCVNLVR+LEQEEVVHLQATDK+NSLLGIEGANSIFTGFLLFPDMDA+TINSPLRPNQVIR+VITNANENYEPR+VPGLYYFTYHASSR+VVTFCDYAQNTFQVTTGGVVLK	2	IPI00653596;
IPI00311187	Rgl1	ral guanine nucleotide dissociation stimulator-like 1.	90098	Q60695,	0.91	8	AQNLLEQFQK+ATISQFNTLTKCVVSTVLGSKELK+CVVSTVLGSK+KAWAAVPK+RLSLLFLGSDIIPGSTPTK	3	IPI00623603;IPI00754216;
IPI00311289	Zfp503	isoform 1 of zinc finger protein 503.	63036	Q7TMA2-1,	1	25	EPGGGGGGGGGGGGGGGVAAEK+KEPGGGGGGGGGGGGGGGVAAEK+KEPGGGGGGGGGGGGGGGVAAEKSGFR+LSSVASNGGGAGGAGNGAGGDK+SSFKPYSKPGSDKK+TGSPSSSASACSPGGMLPSAGGGPEGK	2	IPI00626244;
IPI00311383	Adipoq	adiponectin.	26841	Q60994,	1	361	AVLFTYDQYQEK+DKAVLFTYDQYQEK+GETGDVGMTGAEGPR+IFYNQQNHYDGSTGK+SAFSVGLETR+VTVPNVPIR	2	IPI00742301;
IPI00311490	Phip	ph-interacting protein.	206726	Q8VDD9,	1	5	HDNTVITAVNNMTLK+IFTGSDDCLVK+LSAFFEEHISSVLSDYK+QLLFEDTSLTFGTSSRGRVR+RIFTGSDDCLVK+RYLSSTGADGTICFWLWDAGTLK+SGEAGVSNASR+SSSLSSSAASSPERK+SYFNMIEGQGHGAVFDCK+YLSSTGADGTICFWLWDAGTLK	1	.
IPI00311626	Nsbp1	nucleosome-binding protein 1.	45344	Q9JL35,	1	2	DTGEEVEDGKIEEEGLNEKPGTAK+KEAVAAEAKDDELK+LSAMPVPFTPELKPK	1	.
IPI00312058	Cat	catalase.	59765	P24270,	1	144	ASQRPDVLTTGGGNPIGDK+ASQRPDVLTTGGGNPIGDKLNIMTAGSR+DAILFPSFIHSQK+DGPMCMHDNQGGAPNYYPNSFSAPEQQR+EAETFPFNPFDLTK+FNSANEDNVTQVR+FSTVAGESGSADTVR+FSTVAGESGSADTVRDPR+FYTEDGNWDLVGNNTPIFFIR+GAGAFGYFEVTHDITR+GPLLVQDVVFTDEMAHFDR+IQALLDKYNAEKPK+LAQEDPDYGLR+LCENIAGHLK+LFAYPDTHR+LGPNYLQIPVNCPYR+LNIMTAGSR+LVNADGEAVYCK+NAIHTYTQAGSHMAAK+NFTDVHPDYGAR+NPVNYFAEVEQMAFDPSNMPPGIEPSPDK+SALEHSVQCAVDVK+VLNEEER	1	.
IPI00312374	Aifm3	isoform 1 of apoptosis-inducing factor 3.	66792	Q3TY86-1,	0.97	29	AHSVSVVELEETPFR+AHSVSVVELEETPFRR+CISPSAGHSSSTNVLIVGAGAAGLVCAETLRQEGFSDR	3	IPI00761718;IPI00798537;
IPI00312664	Wbscr17	isoform 1 of putative polypeptide n-acetylgalactosaminyltransferase-like protein 3.	67691	Q7TT15-1,	0.95	32	APLEEYVHKR+GLAGIDLILR+KPYNSNIGFYTK+QDNFEVQR+TPAMIGCSFVVNR+VWLCGGSMEVLPCSR+WNFIQNGAIMNK	2	IPI00458416;
IPI00312700	Myl1	myosin light chain 1, skeletal muscle isoform.	20595	P05977,	1	10	ALGTNPTNAEVK+EGNGTVMGAELR+ITLSQVGDVLR+KPAAAPAPAPAPAPAPAKPK+KVLGNPSNEEMNAKK+VLGNPSNEEMNAK	1	.
IPI00312711	Itih4	pk-120.	104659	.	1	111	ADAVQEATFQVELPR+AHGGTNINNAVLLAVELLDR+DIVWEPPVEPDNTK+DIVWEPPVEPDNTKR+DLSPQDQFNLIEFSGEANQWK+FAHTVVTSR+FEVSVNVAPGSK+FKPTLSQQQK+GELGQFYR+GSEMVVAGK+ILKDLSPQDQFNLIEFSGEANQWK+ITFELIYQELLQR+KTLFSVLPGLK+LFVDPSQGLEVTGK+LGMYELLLK+LPLAAQAHPFRPPVR+LQDQGPDVLLAK+LSYQEGFPGAEISCWTVEI+LWALLTIQQQLEQR+MALDNGGLAR+MLSLPSVAAQYPADPHLVVTEK+MTMNMMGLLQLSGPDK+NGIDIYSLTVDSR+NVIFVIDK+QSLVQATEENLNK+RLGMYELLLK+SDSGGSIQIEEGYFVHH…	1	.
IPI00313105	Olfr232	olfactory receptor mor214-3.	34827	.	0.85	2	QTISFVGCIVQYFILSTMGLTESCLMTAMAYDR	1	.
IPI00313151	Dpysl4	isoform 1 of dihydropyrimidinase-related protein 4.	61962	O35098-1,	0.87	9	ADSAACCDYSLHVDIPR+DKGVNSFLVFMAYK+LQMPVMGMTPADDFCQGTK+MSVVWEKCVASGK+QIGENLIVPGGIK+TIDAHGLMVLPGGVDVHTR+VAVGSDADLVIWNPR	3	IPI00845581;IPI00895996;
IPI00313306	Ptprn	receptor-type tyrosine-protein phosphatase-like n.	106087	Q60673,	0.95	15	EWQALCAYQAEPNTCAAAQDESNIK+NLEGAVNVGGADVK+RPGGSGGSGGSGGLR+SVLLTLVALAGVAGLLVALAVALCMR+TIQQMQR	1	.
IPI00313672	Lsp1	isoform 1 of lymphocyte-specific protein 1.	36714	P19973-1,	1	7	LQQYTQATESSGR+TLWETGEVQSQSASK+TPSCQDIVAGDMSK+TPSCQDIVAGDMSKK	4	IPI00331430;IPI00830840;IPI00830941;
IPI00313817	Hdgf	hepatoma-derived growth factor.	26269	P51859,	0.87	5	GFSEGLWEIENNPTVK	3	IPI00880309;IPI00882349;
IPI00313878	Celsr2	isoform 1 of cadherin egf lag seven-pass g-type receptor 2.	317593	Q9R0M0-1,	0.97	6	CLPTISEK+EGSLGPLPGPSTQPHKGILK+ENGDALTREGSLGPLPGPSTQPHK+ENGEILPLK+ENSGSGALEERPR+FGAMLGNYSCAAQGTQGGSKK+GWLPPNLFNCTSVTFSELK+HPELSQGEAVASVIIYHTLAGLLPHNYDPDK+IVCDSSICHNGGTCVNQWNTFSCECPLGFGGK+KSLDLTGPLLLGGVPDLPESFPVR+LEDMSPER+LLAHESAQRGFGLSATQDVHFTENLLR+LLEGAGDSPSDAFEIDPR+LPLEQGTGSSR+NESHVSCQCNHMTSFAVLMDMSRR+NGGTCVNLLVGGIK+QADGVLLQAVTRGR+TKPICVFWNHSILVSGTGGWSAR+VPWLGDFGTTTK	2	IPI00850704;
IPI00313900	Lum	lumican.	38265	P51885,	1	607	FTGLQYLR+ILGPLSYSK+ISNIPDEYFK+LDGNPLTQSSLPPDMYECLR+LPAGLPTSLLTLYLDNNK+NNQIDHIDEK+RFTGLQYLR+SIPTVNENLENYYLEVNELEK+SLEYLDLSFNQMSK+SLQDLQLTNNK+SVPMVPPGIK	1	.
IPI00314141	Serpina3n	serine protease inhibitor a3n.	46718	Q91WP6,	1	172	AVLDVAETGTEAAAATGVK+DEELSCTVVELK+ELVSDLDKR+EVFSTQADLSAITGTK+FSISTDYSLEDVLSK+GNTLEEILEGLK+KLINDYVR+LINDYVR+MIDELHLPK+MQQVEASLQPETLR+MQQVEASLQPETLRK+QQILTEFQEK+TLMVLVNYIYFK+TLYQAEAFTADFQQPR+VPFDPLDTFK+WKVPFDPLDTFK	1	.
IPI00314191	Cbr1	carbonyl reductase [nadph] 1.	30641	P48758,	1	9	DEERGQTAVQKLQAEGLSPR+GVHAEEGWPNSAYGVTK+SETITEEELVGLMNK+SPEEGAETPVYLALLPPDAEGPHGQFVQDK+VNDDTPFHIQAEVTMK+VVNVSSMVSLR	1	.
IPI00314270	C6	complement component 6.	86631	.	1	10	ATDLQLSDVFLK+GTSGPEENVYSEWLESVK+IFDDFGTHYFTSGSLGGK+SVLRPSQFGGQPCTEPLVTFQPCVPSK+TWSQGDVECQR+VSANLENVNFEVQTIEDDLKTEFYK	1	.
IPI00314309	Apod	apolipoprotein d.	21530	P51910,	1	15	CPSPPVQENFDVK+ELSPDGTMNQVK+MVTMLMFLATLAGLFTTAK+NPYLPPETITYLK	1	.
IPI00314736	Anp32a	acidic leucine-rich nuclear phosphoprotein 32 family member a.	28538	O35381,	1	13	DLSTIEPLKK+IKDLSTIEPLK+ISGDLEVLAEK+IYLELR+LLPQVMYLDGYDR+SLDLFNCEVTNLNAYR	1	.
IPI00314748	Wdr1	wd repeat-containing protein 1.	66407	O88342,	1	2	FGAVFLWDTGSSVGEITGHNK+YAPSGFYIASGDISGK	1	.
IPI00314783	Avil	advillin.	92186	O88398,	0.9	3	GQNQELPEDVDPAKK+GYPSSTNVETVNDGAESAMFK+KENYLSEQDFVSVFGITR+LQQETLDVQVR	2	IPI00652532;
IPI00314844	Twf1	twinfilin-1.	40079	Q91YR1,	0.87	9	EFGGGHIK+GPAEAEATTD+QLQMDVIR+YLLSQSSPAPLTAAEEELR	1	.
IPI00314900	B4galt3	beta-1,4-galactosyltransferase 3.	44084	Q91YY2,	0.95	22	QQLAYGIYVIHQAGNGTFNR+YRPAGCEPR+YRPAGCEPRSRTAIIVPHR	1	.
IPI00314936	Crp	c-reactive protein.	25361	P14847,	1	42	AQGDVFIKPQLWS+ESDTSYVSLEAESK+GYTVGPDASIILGQEQDSYGGDFDAK+KNSNDILIFWNK+NSNDILIFWNK+QYTFGVGGAEVR+SFSVFSYATK	2	IPI00880713;
IPI00314969	Brca2	breast cancer type 2 susceptibility protein homolog.	370664	P97929,	0.97	10	ALCDTPGVDPKLISSIWVANHYR+AMKLFSDIENSEEPSAKVGPR+EDSICPSSVDTGSWPTTLTDTSATVKNAGLISTLK+EENTQIKENISDLTCLEIMKAEETCMK+EKPVVSGSLFYTPK+ISANSTRPAR+KISEPHIFDLK+LACIDIVNTLPLANQK+NQDTQLVLGTK+NSFKDCLR+SLFTHHMSLEPVTCGPFCSSK+SSVTPADSPATLK+TYGIFSTASGK	1	.
IPI00315452	Pnp1	purine nucleoside phosphorylase.	32277	P23492,	0.99	2	DHINLPGFCGQNPLR+MLGADAVGMSTVPEVIVAR	6	IPI00468039;IPI00607023;IPI00751493;IPI00850054;IPI00875288;
IPI00315554	Ube2l6	ubiquitin carrier protein.	17841	.	0.81	3	IYHPNVR+KAEEFTLK	3	IPI00754663;IPI00874750;
IPI00315696	Ctrb1	chymotrypsinogen b.	27822	Q9CR35,	1	56	DGVWTLAGIVSWGSGFCSTSTPAVYAR+ITDVMICAGASGVSSCMGDSGGPLVCQK+IVNGEDAIPGSWPWQVSLQDR+LQQAALPIVSEAK+NDITLLK+TPDKLQQAALPIVSEAK+TTDVVVAGEFDQGSDEENVQVLK+VTALMPWVQEILEAN	1	.
IPI00316045	Cd5l	cd5 antigen-like.	38836	Q9QWK4,	1	66	AGWNLQVSK+ELNCGAVIQTPR+EQSLEFCR+GASYQPPASEQR+GSWGSVCDDNWGEK+GSWGSVCDDNWGEKEDQVVCK+IWLDDVNCSGK+MSCSGQEANLR+VEVEHNGQWGTVCDDGWDR+VEVLHQSQWSTVCK+VQLVGGAHR	2	IPI00654088;
IPI00316736	Psmb10	proteasome subunit beta type-10.	29063	O35955,	0.97	1	LPFTALGSGQGAAVALLEDR+QAVEPTGGFSFENCQR	1	.
IPI00317309	Anxa5	annexin a5.	35752	P48036,	0.99	2	ETSGNLEQLLLAVVK+GTVTDFPGFDGR	1	.
IPI00317356	Pon1	serum paraoxonase/arylesterase 1.	39565	P52430,	1	59	EVTPVELPNCNLVK+GIETGAEDLEILPNGLTFFSTGLK+IFFYDAENPPGSEVLR+ILLMDLNK+IQNILSEDPK+LLIGTVFHK+TITHELLPSINDIAAIGPESFYATNDHYFADPYLR	1	.
IPI00317604	Sec23b	protein transport protein sec23b.	86437	Q9D662,	0.97	158	ERPDLPPVQYEPVLCSRPTCK+LEATRMVVPLACLLTPLK+MVVPLACLLTPLK	4	IPI00654289;IPI00752742;IPI00756981;
IPI00317794	Ncl	nucleolin.	76723	P09405,	1	5	GLSEDTTEETLK+KAAVPTPAKK+THGEAKKMAPPPK+VEGSEPTTPFNLFIGNLNPNK+VIPTPGKKGAAQAK	1	.
IPI00318019	Ptprb	14, 17 days embryo head cdna, riken full-length enriched library,clone:3230402h02 product:similar to protein-tyrosine phosphatase beta.	79341	.	1	3	GPFQPAVATPCAQAPR+NQQWLSTEDGK	1	.
IPI00318175	Sgsh	n-sulfoglucosamine sulfohydrolase.	56722	.	1	26	ADLAAQYTTIGR+MDQGVGLVLQELR+MHCPGLACCTILLVLGLCGAHSR+NLAADPDLAQVLEMLK+TNLYWPGTAEPLLVSSPEHPQR+WELYDISR	1	.
IPI00318376	Ctrl	chymotrypsin-like.	28135	.	1	8	HFVVLGEYDR+ISGVGNVTPAR+NCNIQAPAMYTR+SSNAEPVQVLSIAR	1	.
IPI00318485	Sri	isoform 1 of sorcin.	21627	Q6P069-1,	1	3	CLTQSGIAGGYKPFNLETCR+ITFDDYIACCVK	2	IPI00556765;
IPI00318626	Cdh1	epithelial cadherin.	98256	P09803,	1	38	AVYTVVNDPDQQFVVVTDPTTNDGILK+DQVTTLDVHVCDCEGTVNNCMK+DTANWLEINPETGAIFTR+DTGVISVLTSGLDR+ESYPTYTLVVQAADLQGEGLSTTAK+KDLEIGEYK+LETSFLVR+VFYSITGQGADKPPVGVFIIER+VTDDDAPNTPAWK	1	.
IPI00318993	Sell	l-selectin isoform v2.	43585	P18337,	1	48	AALCYTASCQPGSCNGR+EIEYLENTLPK+SKEDCVEIYIK+SPYYYWIGIR	1	.
IPI00319131	Pex19	isoform 1 of peroxisomal biogenesis factor 19.	32733	Q8VCI5-1,	1	3	AKPSPEHAPTISAPDASGPQK+AMEGLGMDEGDGEASILPIMQSIMQNLLSK+ELEELLESALDDFDK	1	.
IPI00319167	Hydin	hydrocephalus inducing.	581523	Q80W93-1,	0.99	12	EFTISPNSGTIR+ESDYISGHR+EVVNFNCQVR+FIFCNVLVGHQAKAR+FIFCNVLVGHQAKARFK+FTISPSSIINFGALICGTRK+GVVFDGLDTLFAR+IPRMVKVVEESSPYFK+IQFSANVDFASYQCETTEVFFK+KGSTSSSRR+KLKPHFSISPEEGYIISGTEVALEVTYHPTEIGK+KQGMMVPHTGTDEMSHEADDQR+LIVQDYALEHQR+QALNVWAYPTAVGIFEDSIVCCIK+QETSMILEDSVLDPSLR+QSVSASIK+TNIIAHFQWK	1	.
IPI00319652	Gpx1	glutathione peroxidase 1.	22282	P11352,	1	164	AHPLFTFLR+CEVNGEK+DYTEMNDLQK+FLVGPDGVPVR+FLVGPDGVPVRR+GLVVLGFPCNQFGHQENGK+GLVVLGFPCNQFGHQENGKNEEILNSLK+NALPTPSDDPTALMTDPK+NDIAWNFEK+TIDIEPDIETLLSQQSGNS+YIIWSPVCR+YVRPGGGFEPNFTLFEK	1	.
IPI00319814	Sbsn	isoform 1 of suprabasin.	72334	Q8CIT9-1,	1	53	ALEGINNGITQAGR+DMAETFDQGAHHAFGQGGR+EAQQFGHGHGHGYYAAGQTWQEGDK+FAHGVNHAAGQVGK+FGQGAHHAFGQGGNMADK+FGQGSHHAFGQGGNVANK+LGHETHHAFGQGGNMADK+LGHETHHAFGQGGNVADK+LGHETHHAFGQGGNVAEK+LGHGTHHAFGQGGNVADK+VAHGVQNGVNQAQK+VAHGVQTGVNQAGK+VGQGVQTGFNQGQK	2	IPI00885535;
IPI00319964	Mustn1	musculoskeletal embryonic nuclear protein 1.	8941	Q99JI1,	0.88	1	DYEQAGSAAPSVFSR	1	.
IPI00319992	Hspa5	78 kda glucose-regulated protein.	72422	P20029,	1	62	AKFEELNMDLFR+DAGTIAGLNVMR+DNHLLGTFDLTGIPPAPR+ELEEIVQPIISK+ETAEAYLGK+IEWLESHQDADIEDFK+IINEPTAAAIAYGLDK+ITPSYVAFTPEGER+KSDIDEIVLVGGSTR+MKETAEAYLGK+NELESYAYSLK+NQLTSNPENTVFDAK+SQIFSTASDNQPTVTIK+TFAPEEISAMVLTK+TWNDPSVQQDIK+VEIIANDQGNR+VLEDSDLK+VTHAVVTVPAYFNDAQR	1	.
IPI00319994	Ldha	l-lactate dehydrogenase a chain.	36499	P06151,	1	28	DQLIVNLLK+ITVVGVGAVGMACAISILMK+LVIITAGAR+VIGSGCNLDSAR	4	IPI00751369;IPI00754398;IPI00756114;
IPI00320034	Polr2b	dna-directed rna polymerase ii subunit rpb2.	133911	Q8CFI7,	0.97	21	DLCELNECPLDPGGYFIINGSEK+EMLPHVGVSDFCETKK+IFVNGCWVGIHK+LFEASDPYQVHVCNLCGIMAIANTR+RQMDIIVSEVSMIR+YAYTGECR	1	.
IPI00320208	Eef1b2	elongation factor 1-beta.	24694	O70251,	1	27	KLQIQCVVEDDK+SIQADGLVWGSSK+SYIEGYVPSQADVAVFEAVSGPPPADLCHALR+TPAGLQVLNDYLADK+YGPSSVEDTTGSGAADAK	1	.
IPI00320239	Clec3b	tetranectin.	22257	P43025,	1	413	AENCAALSGAANGK+CLLAFTQPK+CRDQLPYICQFAIV+DQLPYICQFAIV+EKQALQTVCLK+HSVGNDANIWLGLNDMAAEGAWVDMTGGLLAYK+MDVLAQEVALLK+MFEELK+NWETEITTQPDGGK+NWETEITTQPDGGKAENCAALSGAANGK+QALQTVCLK+TFHEASEDCISQGGTLGTPQSELENEALFEYAR	2	IPI00890884;
IPI00320420	Clu	clusterin.	51656	Q06890,	1	1071	ASGIIDTLFQDR+CQEILSVDCSTNNPAQANLR+EDALEDTR+EDALEDTRDSEMK+EIQNAVQGVK+ELHDPHYFSPIGFPHK+ELLQSFQSK+FMDTVAEK+IDSLLESDR+IDSLLESDRQQSQVLDAMQDSFAR+KEDALEDTR+KKEDALEDTR+KSLLNSLEEAK+KSLLNSLEEAKK+LFDSDPITVVLPEEVSK+LFDSDPITVVLPEEVSKDNPK+LTEQYKELLQSFQSK+QELNDSLQVAER+QQSQVLDAMQDSFAR+RPHFLYPK+SLLNSLEEAK+SLLNSLEEAKK+VSTVTTHSSDSEVPSR+YINKEIQNAVQGVK	2	IPI00753742;
IPI00320675	Cfi	complement factor i.	67234	Q61129,	1	3367	ACNGVNDCGDQSDELCCK+AGTPVCAMNGR+AHSYQVWTALLDWLKPNSQLGIQTVK+CIEGTCICK+CIISGWGR+CNGEVDCITGEDESR+DGSIDACK+ECELPNSVPACVPWSPYLFQPNDR+EMQCAGTR+GVETSLAECAFTK+LPYQCPR+LVDQDER+NSWSMAEANVACVDLGFPLGVR+QDADFPTSLSFQCVNGK+RTELSNGLAGVVCYK+SCNKVFCQPWQR+SFECLHPEIK+SGVCIPDQYK+SLVSQHNV+SPSASDLPQEELVDQK+SYPTYCHQK+TEGLVQVK+TELSNGLAGVVCYK+TKTEGLVQVK+VANYFDWISYHVGR+VFCQPWQR+VIGGKPANVGDYPWQVAIK+YNGATFQNDIALIEMK	2	IPI00896605;
IPI00320847	Hsd17b10	3-hydroxyacyl-coa dehydrogenase type-2.	27419	O08756,	0.94	1	IHTLEDFQR+LVAGEMGQNEPDQGGQR	3	IPI00626132;IPI00830581;
IPI00321022	Hmcn2	hemicentin 2.	547198	.	1	42	AQASHAGGYSCVAENTAGR+CVATNVAGSAGLK+DVELVVQVPPR+EAPQVSINAR+GGLEVILAPGDSR+GGLEVILAPGDSRSGTLR+IISSHLGDEGQYQCVAFSPAGQQAK+ILQLPLVQAEDAGRYSCK+IMHASPEDAGNYFCIAQNSVGSAMAK+LQALSTADGGDYSCTAR+LQVLEEGQVLK+LVVQVPPVIENGLPDLSTIEGSHALLPCTAK+MAPVILTCHSTGSPTPAVSWSK+MGDVDAGFEPLPHEEEAQGR+QGSSPGTCFRR+STSLEVYVPPTIEGADGGPYLVQAVAGRPVALECVAR+TTLLPCQTHGVPTPLVSWRK+VAGENASLPCPAQGTPKPR+VLQTDEGLNVLLNIPDSAK+VLVPPNIEPGPVNK+YQCLA…	1	.
IPI00321074	Vasn	vasorin.	72261	Q9CZT5,	1	17	ENHVVLASPEETR+HIQPGAFDALDR+LLNLHDLDVSDNQLEHMPSVIQGLR+NLSGPDKRLVTLR+TPEGEEACGEANTSQAVR	1	.
IPI00321126	Chrna1	acetylcholine receptor subunit alpha.	51939	P04756,	0.95	13	IFTEDIDISDISGKPGPPPMGFHSPLIK+LGTWTYDGSVVAINPESDQPDLSNFMESGEWVIK+WNPDDYGGVKK+YVAMVMDHILLGVFMLVCLIGTLAVFAGR	1	.
IPI00321190	Psap	sulfated glycoprotein 1.	61422	Q61207,	1	154	ANEDVCQDCMK+CVWGPSYWCQNMETAAR+EEILAALEK+EVVDSYLPVILDMIK+GCSFLPDPYQK+GEMSNPGEVCSALNLCQSLQEYLAEQNQK+GLSNACALLPDPAR+IGVCPSAYK+IPEVDMAR+LGPGVSDICK+LVLYLEHNLEK+LVSDVQTAVK+NGGFCEVCK+QCDDFVAEYEPLLLEILVEVMDPGFVCSK+QLESNKIPEVDMAR+QPAQPKQSALPAHVPPQKNGGFCEVCK+QSALPAHVPPQK+TCSGGSAVLCR+TLVPATETIK+TVVTEAGNLLK+VVAPFMSNIPLLLYPQDHPR	1	.
IPI00321268	Actr8	actin-related protein 8.	70546	Q8R2S9,	0.96	10	ELVHMILMK+KMYSSILVVGGGLMFHK+KMYSSILVVGGGLMFHKAQEFLQHR+LHSQEVDLASSQGDCLMAGNESEEALTALMSRK+LQAPMALFYPATFGIVGQK+QMRPAILDHCSGNK	1	.
IPI00321375	Btd	biotinidase.	59279	Q8CIF4,	1	57	DAQEVHCDEAAK+EAEYYVAAVYEHPSVLSPNPLELVSR+GHLIIAQVATNPQGLTGTGNTTSEMDPSHR+GLSSGLVTAALYGR+HNLYFEAAFDTPANVDLITFDTPFAGK+ILSGDPYCEK+QNLDVYEQQVMAAAQK+QPCLSSDPGCPQDGR+SFWYHDMDDPK+TSIYPFLDFMPSPK	1	.
IPI00321666	H2-Q10	h-2 class i histocompatibility antigen, q10 alpha chain.	37251	P01898,	1	1202	AKGNEQSFHVSLR+APWMEQEGPEYWER+AYLEAECVEWLLR+DYIALNEDLK+FDSDAETPR+FIIVGYVDDTQFVR+GNEQSFHVSLR+GYLQYAYDGR+KWEQAGAAEYYR+RKWEQAGAAEYYR+TDPPKTHVTHHPGSEGDVTLR+THVTHHPGSEGDVTLR+TWTAADVAAIITR+WASVVVPLGK+WEPPPSTDSIMSHIADLLWPSLK+WEQAGAAEYYR+YFETSVSRPGLGEPR	1	.
IPI00321734	Glo1	lactoylglutathione lyase.	20810	Q9CPU0,	1	35	DFLLQQTMLR+GFGHIGIAVPDVYSACK+GLAFIQDPDGYWIEILNPNK+LDFPAMK+RFEELGVK+SLDFYTR+TAWTFSR+VLGLTLLQK	1	.
IPI00321978	Ranbp1	ran-specific gtpase-activating protein (fragment).	23596	P34022,	1	24	AWVWNTHADFADECPKPELLAIR+FASENDLPEWK+TLEEDEEELFK	1	.
IPI00322044	Atxn7	atxn7 protein.	93012	Q8R4I1,	1	31	CSPGSSTVGNSGSKPTK+EFGKNREVMGLCR+GSGAGGSSRPPSGGVLCASSSSK+KCSPGSSTVGNSGSKPTK+RPLPSPEAMLGQSWNLWVEASK+STVGPACPATMSSAVKPGLNCPSIPKPTLPSPGQILNGK	1	.
IPI00322209	Krt8	keratin, type ii cytoskeletal 8.	54565	P11679,	1	3	ELQSQISDTSVVLSMDNSR+FASFIDK+FASFIDKVR+LEAELGNMQGLVEDFK+NKYEDEINK+NKYEDEINKR+RTEMENEFVLIK+YEDEINK+YEDEINKR	3	IPI00418411;IPI00554648;
IPI00322304	Hrg	histidine-rich glycoprotein hrg.	60439	.	1	1233	AGTATVYYLALDVIESDCWVLSTK+ALLSYSIETSDLETPDSIDINCEVFNIEDHK+AQDDCLPSR+DHHHTHK+DSPVLLDFFEDSELYR+DSPVLLDFFEDSELYRK+DTSDMKPHWGHERPLCDK+FESEFPQISK+FFGYTPPK+GLFPFHHQQIGYVYR+GYGPPHGHSR+LGCPPPPEGK+LPPLNIGEVLTLPEANFPSFSLPNCNR+RSGYVFELLR+SCPGKFESEFPQISK+SGYVFELLR+SLQPEIQPFPQTASR+SPLVFGFCR+TDNGDFASFR+TNYYVEFSMR+VLDLINK+VSDAHLDR+WQSEIVIGQCK+YKTDNGDFASFR	1	.
IPI00322312	Arhgdia	rho gdp-dissociation inhibitor 1.	23407	Q99PT1,	1	2	AEEYEFLTPMEEAPK+VAVSADPNVPNVIVTR	1	.
IPI00322447	Cadm1	isoform 1 of cell adhesion molecule 1.	49788	Q8R5M8-1,	0.93	4	AGEEGTIGAVDHAVIGGVVAVVVFAMLCLLIILGR+EDDGVPVICQVEHPAVTGNLQTQR+SDDSVIQLLNPNR	7	IPI00410985;IPI00411088;IPI00461967;IPI00849722;IPI00856723;IPI00875244;
IPI00322463	Apoh	beta-2-glycoprotein 1.	38619	Q01339,	1	3227	ATFGCHETYK+ATFGCHETYKLDGPEEAECTK+ATVLYQGMR+CPFPPRPENGYVNYPAKPVLLYK+CSYTVEAHCR+DGTIEIPSCFK+DKATFGCHETYK+EHSSLAFWK+EHSSLAFWKTDASELTPC+FTCPLTGMWPINTLR+ICPKPDDLPFATVVPLK+IHFYCK+IQEQFKNGMMHGDK+ITCPPPPVPK+KATVLYQGMR+KCSYTVEAHCR+LDGPEEAECTK+LPECLEVK+NGMMHGDK+TDASELTPC+TGTWSFLPTCR+TSYDPGEQIVYSCKPGYVSR+VCPFAGILENGIVR+WSPDIPACAR+YTSFEYPK	1	.
IPI00322513	Igfbp7	igfbp7 protein (fragment).	27158	.	1	21	AGAAAGGPATLAVCVCK+DACGCCPVCAR+EDAGEYECHASNSQGQASAAAK+GEGEPCGGGAAGGGHCAPGMECVK+GEGEPCGGGAAGGGHCAPGMECVKSR+GTCEQGPSIVTPPK+ITVVDALHEIPLK+LGCPLGETR+RDHSGVQR+TELLPGDRENLAIQTR	3	IPI00651875;IPI00652107;
IPI00322562	Rps14	40s ribosomal protein s14.	16273	P62264,	1	7	ADRDESSPYAAMLAAQDVAQR+DESSPYAAMLAAQDVAQR+ELGITALHIK+IEDVTPIPSDSTR	1	.
IPI00322748	Fbln1	isoform d of fibulin-1.	78033	Q08879-1,	1	30	AGFYFDGISR+ANADISMEACCTDGNQMANQHR+AVTPLYPANQADIIFDITEGNLR+CLSFECPENYR+CVDVDECSPPAEPCGK+DCSLPYTSESK+DSSCGTGYELTEDNNCK+EFTRPEEIIFLR+NCQDIDECVTGIHNCSINETCFNIQGSFR+NVPNCGRGYHLNEEGTRCVDVDECSPPAEPCGK	1	.
IPI00322867	Itih1	itih1 protein.	101663	Q61702,	1	102	AAVLGESAGLVR+AQGSHPELSSPASILIMLTDGEPTEGETDR+ATCLVDEEEMK+ATCLVDEEEMKK+DGVVVTINK+EVAFDVEIPK+FAHYVITSQVVNNADK+FSLAGATNLNGGLLR+GHVLENHVER+GLLGQFFSPLDFEVFDLHPGSDPTK+GLTDEDGLEPTIDKPLEDSQPLEMVGPR+GSLVPVSNANLQAAQDFVR+GSLVPVSNANLQAAQDFVRR+ILEDMRPVDNFDLVLFGSK+LCDLLVANNYFTHFFAPK+LDAQASFLSEELAAQTIK+LMQYDITIK+LTYEEVLK+QYYDGSEIVVAGR+TAFISDFAITSDGK	1	.
IPI00322936	Plg	plasminogen.	90782	P20918,	1	2207	CEGETDFVCR+CQSWAAMFPHR+CSETGGSVVELPTVSQEPSGPSDSETDCMYGNGK+CTTPPPPPSPTYQCLK+DVILFEK+EAQLPVIENK+EQQCVIMAENSK+FTGQHFCGGTLIAPEWVLTAAHCLEK+FVDWIER+GKTAVTAAGTPCQGWAAQEPHR+GPWCYTTDPSVR+GSDVQEISVAK+GTSSTTITGK+GTVSVTVSGK+HNRTPENFPCK+HSIFTPQTNPR+KCQSWAAMFPHR+KLYDYCDIPLCASASSFECGKPQVEPK+KQLAAGGVSDCLAK+LILEPNNR+LKEAQLPVIENK+LSRPATITDK+LYDYCDIPLCASASSFECGKPQVEPK+MRDVILFEK+NLEENYCR+NPDGDKGPWCYTTDPSVR+NPDGDVNGP…	1	.
IPI00323035	Fbln5	fibulin-5.	50193	Q9WVH9,	1	15	DMDVVSGR+GDMMCVNQNGGYLCIPR+GDMMCVNQNGGYLCIPRTNPVYR+QSGQCLDIDECR+QSGQCLDIDECRTIPEACR+SCQDVNECETENPCVQTCVNTYGSFICR	1	.
IPI00323230	Spna1	spectrin alpha chain, erythrocyte.	279994	P08032,	0.83	15	EAIVTLVELGDDWER+EIDNTLQNINSKR+FENVQSLAAAHHEK+GDSGDTLAATQSLLKK+KESLNEAHK+KGYVSLEDYTSFLIDKESENIK+KHEAFLVDLNAFENSIK+MQHNLEQQIQAK+REIDNTLQNINSK+TIGGVISSPELAEDLTGTEILLER	3	IPI00679092;IPI00896567;
IPI00323235	Ltf	lactotransferrin.	77866	P08071,	1	47	ADAMTLDGGTMFDAGKPPYK+CAPNSKERYQGYTGALR+CASSPEEPYSGYAGALR+CGLVPVLAENQK+CPGEFCLFQSK+DRFPNLCSSCAGTGANK+ECHLAQVPSHAVVSR+FNEFFSQSCAPGADPK+GDADAMSLDGGYIYTAGK+GSTVFEELPNK+IPIGTLRPYLNWNGPPASLEEAVSK+LKDFELLCLDDTR+NCHLAIAPNHAVVSR+NLLFNDNTECLAK+QCIQAIVTNR+QCSSSPLLEACAFLTQ+SNGLDCVNRPVEGYLAVAAVR+SNLCALCIGDEK+STNDKEEAIWELLR+TDKVEVLQQVLLDQQVQFGR+VTCISFPTTEDCIVAIMK+VTWCAVGSEEK+WCAVSNSEEEK+YQGYTGALRCLAEK	1	.
IPI00323256	Zfpm2	isoform 1 of zinc finger protein zfpm2.	127692	Q8CCH7-1,	0.87	2	AQVPMVLTAGPK+GVNGASQAPSSGK+HGSSSYPPVIYSPLMPK+LLDYHECTVCK+MEEFLPPGASLK+QQLPVGTTWGPFAGK	2	IPI00409794;
IPI00323357	Hspa8	heat shock cognate 71 kda protein.	70871	P63017,	1	57	CNEIISWLDK+DAGTIAGLNVLR+FDDAVVQSDMK+FEELNADLFR+IINEPTAAAIAYGLDK+LYQSAGGMPGGMPGGFPGGGAPPSGGASSGPTIEEVD+NQVAMNPTNTVFDAK+NSLESYAFNMK+RFDDAVVQSDMK+SFYPEEVSSMVLTK+SINPDEAVAYGAAVQAAILSGDK+STAGDTHLGGEDFDNR+TTPSYVAFTDTER+TVTNAVVTVPAYFNDSQR+VEIIANDQGNR	1	.
IPI00323571	Apoe	apolipoprotein e.	35867	P08226,	1	701	EHMEEVR+ELEEQLGPVAEETR+EVQAAQAR+FWDYLR+GRLEEVGNQAR+GWFEPIVEDMHR+IQASVATNPIITPVAQENQ+KELEEQLGPVAEETR+LEEVGNQAR+LGADMEDLR+LGPLVEQGR+LKGWFEPIVEDMHR+LQAEIFQAR+MEEQTQQIR+NEVHTMLGQSTEEIR+QWANLMEK+SKMEEQTQQIR+TANLGAGAAQPLR+TANLGAGAAQPLRDR+WVQTLSDQVQEELQSSQVTQELTALMEDTMTEVK	1	.
IPI00323575	Cdc45l	cdc45-related protein.	65384	Q9Z1X9,	0.93	15	EMIEESANKFGMK+FQSMDVSLK	2	IPI00653294;
IPI00323592	Mdh2	malate dehydrogenase, mitochondrial.	35611	P08249,	1	57	AGAGSATLSMAYAGAR+ANTFVAELK+EGVVECSFVQSK+ETECTYFSTPLLLGK+FVFSLVDAMNGK+GCDVVVIPAGVPR+GYLGPEQLPDCLK+HGVYNPNK+IFGVTTLDIVR+IQEAGTEVVK+KGEDFVK+LTLYDIAHTPGVAADLSHIETR+MIAEAIPELK+TIIPLISQCTPK+VAVLGASGGIGQPLSLLLK+VDFPQDQLATLTGR	1	.
IPI00323600	Coro1a	coronin-1a.	50989	O89053,	0.96	11	ATPEPSGTPSSDTVSR+KCEPIAMTVPR	2	IPI00856886;
IPI00323683	Efnb2	10 days neonate skin cdna, riken full-length enriched library,clone:4732484e22 product:ephrin b2, full insert sequence.	42581	.	0.96	1	FQEFSPNLWGLEFQK+HSPQHTTTLSLSTLATPK+RPELEAGTNGR	3	IPI00762720;IPI00830394;
IPI00323816	Selenbp2	selenium-binding protein 2.	52610	Q63836,	0.98	1	NTGTEAPDYLATVDVDPK	3	IPI00623845;IPI00880282;
IPI00323881	Kpnb1	importin subunit beta-1.	97152	P70168,	0.94	3	IQFNDLQSLLCATLQNVLR+KYLEVVLNTLQQASQAQVDK+MELITILEK+TTLVIMER+VEFILSFIDHIAGDEDHTDGVVACAAGLIGDLCTAFGK	2	IPI00742334;
IPI00323911	Gsta4	glutathione s-transferase a4.	25564	P24472,	1	9	DGHLLFGQVPLVEIDGMMLTQTR+EKEESYDLILSR+IDMYADGTQDLMMMIAVAPFK+ISNIPTIK+KPPPDGPYVEVVR	1	.
IPI00329872	Col1a1	isoform 1 of collagen alpha-1(i) chain.	138032	P11087-1,	1	195	ALLLQGSNEIELR+DGIPGQPGLPGPPGPPGPPGPPGLGGNFASQMSYGYDEK+DLEVDTTLK+DRDLEVDTTLK+EGECCAFCPEEYVSPNSEDVGVEGPK+FTYSTLVDGCTSHTGTWGK+GAAGPPGATGFPGAAGR+GANGAPGIAGAPGFPGAR+GDTGAPGAPGSQGAPGLQGMPGER+GEAGPPGPAGFAGPPGADGQPGAK+GEAGPPGPAGFAGPPGADGQPGAKGEPGDTGVK+GEAGPQGAR+GEPGATGVQGPPGPAGEEGK+GEPGATGVQGPPGPAGEEGKR+GEPGPPGPAGAAGPAGNPGADGQPGAK+GEPGSPGENGAPGQMGPR+GETGPAGPAGPIGPAGAR+GFPGADGVAGPK+GLPGPPGAPGPQGFQGPPGEPGE…	1	.
IPI00329913	Pcmt1	isoform 1 of protein-l-isoaspartate(d-aspartate) o-methyltransferase.	24634	P23506-1,	1	7	ALDVGSGSGILTACFAR+ELVDDSITNVK+LILPVGPAGGNQMLEQYDK+MKPLMGVIYVPLTDK	3	IPI00480558;IPI00757109;
IPI00330010	Slfn8	schlafen 8.	104264	.	1	25	ITEAACALLNSGGGLIAMQMTNK+QQIRSFSCGLLILYRSWAVDLNLK+SFSCGLLILYR+VPVFHFCSSKDK	3	IPI00648796;IPI00758265;
IPI00330037	5830457O10Rik	protein derpc.	52244	Q8BHM2,	0.89	2	ACGLGPGLGPNPR+AGVLSSGTGPPNPRPVGLGPGPSPNLR+GMNPTGTGAVSFPRPGGLLGPGPGPGLNPR+LGGLPGPGPMANPRAGGLLGASPDPRSGGPMVPGCGPNMR+SAGPLGPGQVAFPR+SGGPMVPGCGPNMR+SGMFPGPGLGPNPR+TGALPGPGPMSNPR	1	.
IPI00330057	Denr	density-regulated protein.	22166	Q9CQJ6,	1	4	QETGITEGQGPVGEEEEK+WPEVDDDSIEDLGEVK	1	.
IPI00330163	Cadps	isoform 2 of calcium-dependent secretion activator 1.	153935	Q80TJ1-2,	0.93	9	DVLGSAASGAR+EMENMYIEELK+ETVLSSWMAK+IVYCTMEVEGGEK+KFEHQLLYNACQLDNPDEQAAQIRR+LTVEEATASVSEGGGLQGISMK+TSEGSAGSAGMGGSGAGAGVGAGGGGGSGASSGGGAGGLQPSSR+YCFPFGRPEGALK+YVDLMESSIAQSIHR	3	IPI00668903;IPI00670114;
IPI00330176	Mon2	isoform 1 of protein mon2 homolog.	189078	Q80TL7-1,	0.98	4	DAFITAICK+DNITNNTAAATVR+ESSTTADK+ESSTTADKEKIESGGGNILIHHSR+MSCTNSPEAVK+RSQDVLHR	2	IPI00469486;
IPI00330225	Dnahc9	dynein, axonemal, heavy chain 9 isoform 5.	512345	.	0.99	17	ALGIMVYVFNCSEQMDYK+CQQEAELTAGTISLANR+EIMNVQYISCMNPTAGSFTINPR+ELAYDAQK+IFAMPSLVPR+ISVEVLSVVAVQVK+ITNEPPTGMHANLHK+LIQVVGVETSK+LSTADSVISIWFEVQR+NHLEWPHMVCQDIR+QLMQATGVNFTMNQDTTLAHLLQLQLHHFEDEVR+QSSTDDMFEPLK+SFGSPPLAVSNVSAAVMVLMAPGGK+TSQSYLTNEQR+VTLCFSPVGNK	2	IPI00473970;
IPI00330542	Mst1	hepatocyte growth factor-like protein.	80588	P26928,	1	3	AVCGPAGSQLVLLK+CDDDQPPSILDPPDQVVFEK+CGPLLDCR+CTEELVPEGCYHGSGEQYR+EAVCVLCNGEDYR+EFCDLPSCGPNLPPTVK+EQWVLTAR+GEVDVTESGR+GPWCYTTNR+GTTNTTSAGVPCQR+MAFCHQIPR+NGLEENFCR+NLLHTAVPGPWQEDVADAEECAR+NPDGDSHGPWCYTLDPDILFDYCALQR+NPDGSERPWCYTTDPNVER+QCIWSCHEPLTGYEVWLGTINQNPQPGEANLQR+SPLNDFQLFR+SVRFQSCGIKTCR+TAGGLPCQAWSR+TCIMDNGVSYR+VSVFVDWINK+VVGGHPGNSPWTVSLR+WDLQHPHSHPFQPEK	1	.
IPI00330594	Clec4f	c-type lectin domain family 4 member f.	61269	P70194,	1	68	ANGHLEQTDAQIQGLK+ELETLTAQTQK+ESGALALETQALR+ETEMQVAIQR+GLEEAQSEIQALR+LGALQEAVAAQK+SNVQMLQSNLQR+SSLEVASADIHSLR+SSTENTSAELHVLGR+TQNQVLQLIAQNWK+WVDGTPFNNAQSK	1	.
IPI00330624	Nup153	nucleoporin 153.	152068	.	0.96	8	CVSCTSEKPGLVSASSSSPAPVSLSSGGCLGLDK+MASEAGGIGGGGGGGK+MASEAGGIGGGGGGGKIRTR+NMFSSSGTSVSGR+RPVGSWECPVCCVCNK+SHLNFSVLESPALHCQPSTSSAFPIGSSGFSLVK+STQAAVLPPASIGFTFSVPLAK+TSQLGDSPFYPGK+TVYFKPSLTPSGDLRK	1	.
IPI00330685	Acat3	acetyl coa transferase-like protein.	41465	.	1	3	AGHFDKEIVPVLVSSR+AVCLAAQSIAMGDSTIVVAGGMENMSK+EIVPVLVSSR+ELGLNPEK+GVAALCIGGGMGVAMCVQR+GVAALCIGGGMGVAMCVQRG+ILVTLLHTLER+IVSWSQAGVEPSVMGVGPIPAIK+LKPYFLTDGTGTVTTANATGMNDGAAAVVLMK+QASVGAGIPYSVPAWSCQMICGSGLK+SDPVVIVSAAR+TAIGSFNGALSTVPVHEMGTTVIK+VAPEEVSEVIFGHVLTAGCGQNPTR+VAVLSQNR	2	IPI00776358;
IPI00330843	F12	coagulation factor xii.	65701	.	1	598	CFEPQLLK+CPTGYTGYFCDLDLWATCYEGR+DAPDGPTVVLTVDGR+FFHENELWFR+FKDAPDGPTVVLTVDGR+GGTCINTPNGPHCLCPEHLTGK+GLSSFMR+GQAGTTQSGAPCQR+GSEAHCKPVASQACSINPCLNGGSCLLVEDHPLCR+GVISWGSGCGDR+HNPCHK+KFKDAPDGPTVVLTVDGR+LCHFPFQYHR+LHEGFSSITYQHDLALLR+NKPGVYTDVANYLAWIQK+QALSWGLGHHAFCR+RPGSRPWCATTPNFDEDQQWGYCLEPK+TNTMGCGQR+WTVEATYR	1	.
IPI00330897	Topors	e3 ubiquitin-protein ligase topors.	117082	Q80Z37,	0.94	6	DCDVTALADDLSTSQTVENCDSPAVPVEQTLDVR+DISAEFFRRNPACLHR+EEGEAPPLVPAEEGRR+RELASNGPAVPATASSEIMASAAK	1	.
IPI00330902	Trrap	transformation/transcription domain-associated protein.	435801	Q80YV3,	1	43	ALLFVMMDLTGEVSNGAVAMAK+CYLQLAGVMGK+DILKEVQSNMVPRSMLK+EMAWKVNMYR+EVLQDMVPPK+EVLQDMVPPKK+FITLLLPGGAQTAVRPGSPSTSNMR+GLSVDSAQEVK+KTFEQALTGAFMSAVIK+KWMEVVVITHK+LAVMSMEMR+LMSIFPTEPSTSSVASK+LMTFAWPCLLSK+LTPNISEFLTTIGVSGPLTASMIAVAR+LVLEILHR+QADMLDSLR+QAMHSLQVLAQVTGK+QAWEVIRCFLVAMMSLEDNK+QCIELLLAVCEK+QTFQVTDCR+VACQVNDNTNTAGSPGEVLSRR+VNTLVAAANSLDNLCR+WMEVVVITHK	3	IPI00762214;IPI00776048;
IPI00331064	Cacna1e	calcium channel, voltage-dependent, r type, alpha 1e subunit.	257202	Q61290,	0.8	10	ACFMNNSGILEGFDPPHPCGVQGCPAGYECK+EPTIHEEER+FGEAVVVGRPGSGDGDSDQSR+GCEPDTTAPSGQNESER+LDEESHINR+LFMFIFAVIAVQLFK+MLDLLVPMPK+RGGPGPGMMCGAVSDLLSDTEEDDKC+YLNIAFTMVFSLECVLK	1	.
IPI00331088	Serpinf1	pigment epithelium-derived factor.	46234	P97298,	1	49	AAFEWNEEGAGSSPSPGLQPVR+ALYYDLITNPDIHSTYK+DTDTGALLFIGR+KTTLQDFHLDEDR+LAAAVSNFGYDLYR+LQSLFESPDFSK+LSFEGELTK+LTFPLDYHLNQPFLFVLR+SSASPTGNVLLSPLSVATALSALSLGAEHR+TTLQDFHLDEDR+VDLQEINNWVQAQMK+YGLDSDLNCK	1	.
IPI00331091	Ints7	isoform 1 of integrator complex subunit 7.	106861	Q7TQK1-1,	0.81	12	DLYQASFDADSATLR+ILMCHCLAAIAMQLPVLGDGMLGDLVELYK+MMSVYSRVLEEVESLNRK+MVIVSLHTFTLLAASSLVDTPK+QLLQQLVTSYPSTK+QQELLVSLATVIFVASQK+VEGVVQHGSKPGLFR+VQSVCLNVSSTLQSK	1	.
IPI00331106	AV249152	isoform 1 of wd repeat-containing protein loc51057 homolog.	81731	Q8C456-1,	0.95	43	DMLNEGFASSALMPEGENK+EPMADSCIYESVR+RDMLNEGFASSALMPEGENK	2	IPI00889218;
IPI00331146	Cmpk1	ump-cmp kinase.	25715	Q9DBP5,	1	16	EMDQTMAANAQK+IQTYLESTKPIIDLYEEMGK+KNPDSQYGELIEK+NPDSQYGELIEK+REMDQTMAANAQK+SVDEVFGEVVK+YGYTHLSAGELLR	1	.
IPI00331163	Skp1a	s-phase kinase-associated protein 1.	18672	Q9WTX5,	0.88	1	NDFTEEEEAQVR+TMLEDLGMDDEGDDDPVPLPNVNAAILK	1	.
IPI00331167	Sap30bp	sap30-binding protein.	33832	Q02614,	0.98	105	CSNHLQDK+TTVISAVGTIVK	2	IPI00667688;
IPI00331221	Apoa5	apolipoprotein a-v.	41262	Q8C7G5,	0.86	2	EPPLLAQDPEGIR+EPPLLAQDPEGIRK+LVTGIGHHVQELHR	1	.
IPI00331241	Gsta3	glutathione s-transferase a3.	25361	P30115,	1	44	AILNYIASK+KPFDDAK+SDGSLMFQQVPMVEIDGMK+SHGQDYLVGNR+VSNLPTVK+WLLAAAGVEFEEK+YFPAFEK	1	.
IPI00331280	Adamts2	a disintegrin and metalloproteinase with thrombospondin motifs 2.	135299	Q8C9W3,	1	5	AFCSALAKPK+GPPLDGTMCAPGK+KWSPCSKPCGGGSQFTK+MEEEEFFIEPLEK+QDFGPSGMQGYAPVTGMCHPVR+YLLTLMNIVNEIYHDESLGAHINVVLVR	1	.
IPI00331314	Dip2b	isoform 1 of disco-interacting protein 2 homolog b.	171126	Q3UH60-1,	0.9	4	CPCLTGLDVTGKPVYTLTYGK+GLEPSPAAVAALPPEVR+GTSGSLADVFANTR+QPGVGPASVMVGNLVAGK+QPGVGPASVMVGNLVAGKR+RPGVPGAPLPGR+RTELTAATGER+TGGMMYFGLAGVTK	1	.
IPI00331318	Ppt1	palmitoyl-protein thioesterase.	34621	O88531,	1	2	EIPGIYVLSLEIGK+ETIPLQESTLYTEDR	2	IPI00648852;
IPI00331334	Bag3	bag family molecular chaperone regulator 3.	61828	Q9JLV1,	1	2	AAPSPAPAEPAAPK+QCGQMPATATTAAAQPPTAHGPER+SQSPAASDCSSSSSSASLPSSGR+THYPAQQGEYQPQQPVYHK	2	IPI00387388;
IPI00331442	Msra	peptide methionine sulfoxide reductase.	25988	Q9D6Y7,	1	4	ALQLLSSANPVR+HHVSGNR+NPDGYCGLGGTGVSCPMAIKK+QGNDFGTQYR+RALQLLSSANPVR+RMGDSASK+VISAEEALPGR	2	IPI00475322;
IPI00331528	Glrx	glutaredoxin-1.	11871	Q9QUH0,	1	13	DCIGGCSDLISMQQTGELMTR+KTQEILSQLPFK+TQEILSQLPFK+VVVFIKPTCPYCR	1	.
IPI00331551	F10	coagulation factor x.	54018	O88947,	1	1147	DGIGGYTCTCSEGFEGK+DTYDYDIAVLR+DWAESTLMTQK+EEGNEMVHEVDVVIK+EEQNSVVCSCASGYFLGNDGK+LDNGDCDQFCR+LDNGDCDQFCREEQNSVVCSCASGYFLGNDGK+LEDACQGDSGGPHVTR+MLEVPYVDR+MNVAPACLPQK+MNVAPACLPQKDWAESTLMTQK+NCELFVR+NTEKEEGNEMVHEVDVVIK+NTYYVTGIVSWGEGCAR+SCISTAPFPCGK+TGIVSGFGR+YKDGDQCESSPCQNQGACR	2	IPI00885899;
IPI00331556	Hspa4	heat shock 70 kda protein 4.	94133	Q61316,	1	5	AESEEMETSQAGSK+AFSDPFVEAEK+GCALQCAILSPAFK+HAEQNGPVDGQGDNPGSQAAEHGADTAVPSDGDK+KEDIYAVEIVGGATR+KLMSANASDLPLSIECFMNDIDVSGTMNR+KPVVDCVVSVPSFYTDAER+LMNETTAVALAYGIYK+MQVDQEEPHTEEQQQQPQTPAENK+NVVFVDMGHSAYQVSVCAFNK+RSVMDATQIAGLNCLR	1	.
IPI00331644	Psma3	proteasome subunit alpha type-3.	28405	O70435,	1	6	AVENSSTAIGIR+CKDGVVFGVEK+VFQVEYAMK	1	.
IPI00336281	Golga3	isoform 1 of golgin subfamily a member 3.	162821	P55937-1,	0.87	8	AMTDLQSMLEAK+AYENAVSILSR+DMSLVHQQMAELEGHLQSVQK+KLDEQMSQQPTGSQEMEDLK+LDEQMSQQPTGSQEMEDLK+LEGQVEALSLEASQALQEK+RLEGQVEALSLEASQALQEK+SELEMVQEDLSETQK+VGSLGLLAHSK	2	IPI00469799;
IPI00336324	Mdh1	malate dehydrogenase, cytoplasmic.	36511	P14152,	1	27	DLDVAVLVGSMPR+ELTEEKETAFEFLSSA+ENFSCLTR+EVGVYEALKDDSWLK+FVEGLPINDFSR+GEFITTVQQR+KLSSAMSAAK+LGVTADDVK+NVIIWGNHSSTQYPDVNHAK+VIVVGNPANTNCLTASK	1	.
IPI00336362	Aldh1a7	aldehyde dehydrogenase, cytosolic 1.	54588	O35945,	0.89	3	EEIFGPVQQIMK+ELGEHGLYEYTELK+FPVLNPATEEVICHVEEGDK+GFFVQPTVFSNVTDEMR+ILGLIESGK+KFPVLNPATEEVICHVEEGDK+LADLMER+MSSPAQPAVPAPLANLK	1	.
IPI00336881	Ddah2	n(g),n(g)-dimethylarginine dimethylaminohydrolase 2.	29646	Q99LD8,	0.94	2	AGAGLSSLCLVLSTRPHC+GGGDLPNSQEALQK	1	.
IPI00337974	Scn8a	isoform 1 of sodium channel protein type 8 subunit alpha.	225141	Q9WTU3-1,	0.91	17	GFCIDGFTFLR+KGPGSLLVSMEQLASYGR+QEEVSAVVLQR+QQEEAQAAAMATSAGTVSEDAIEEEGEDGVGSPR+TIVGALIQSVK+VPKPNTIELIAMDLPMVSGDR+WTAYGFVK	4	IPI00337976;IPI00337978;IPI00890871;
IPI00338309	Ryr2	ryanodine receptor 2, cardiac.	564819	.	0.99	7	EMVTSLFCK+FAYSFLQQLIR+GLDALSKKVK+GSTPLDVAAASVMDNNELALALR+KPKKDSSLSAVLNSIDVK+LIEDLAKPGAELPEEDEAMKR+LLIRRPECFGPALRGEGGNGLLAAMEEAIK+LLNYFAR+MGKEEEKLMIR+QFIFDVVNEGGEK+QMVDMLVESSNNVEMILK+RSNCYMVCAGESMSPGQGR+SEDGDTPDMK+SFGSQNNNTDIMFYR+SNCYMVCAGESMSPGQGR+TLLALGCHVGIADEHAEEKVK+YNEVMQALNMSAALTARK+YTQMPYMMEVVLPMLCSYMSR	1	.
IPI00338452	Col4a2	collagen alpha-2(iv) chain.	167325	P08122,	1	1	GEAGDCQCGQVIGGLPGLPGPK+GLDGFQGPSGPR+YLGPPGADGRPGPQGVPGPAGPPGPDGFLFGLK	2	IPI00830956;
IPI00338692	Morc1	morc family cw-type zinc finger protein 1.	108310	Q9WVL5,	0.95	10	AYTAVLYFEPR+DPTVTMVWDQSSTK+GLLNQVFLGQCELK+GLPDLWICASNPNNLENSCNQIER+KEETMTCLFFSQTFCEK+KMQSIVYEANR+LSDLRAKLALLLQK+RGLLNQVFLGQCELK+SLLGAGIIGIVNIPLETMEPSHNK	1	.
IPI00338954	Sash1	sam and sh3 domain-containing protein 1.	135591	P59808,	1	6	DPTADVMLLTQSKR+GEDVGYVASEITMSDEER+GLGSLSHGR+KGRPSQPK+KLDGSVVASNLGIAPPQCIPR+LPPSPEAM	1	.
IPI00339509	.	similar to kat protein isoform 1.	12454	.	0.96	1	GLQATQLAQGLGYTGAR	1	.
IPI00340046	.	similar to loc314328 protein.	54178	.	0.93	8	ELIKKLDEK+KGMVNFSSLEK+KGMVNFSSLEKEDLSK+KISVVEFFRSLNPTGLMTMPVGDFR+KLDVSMNGFGNEGALALGDALR+LNSCLVYVDVSR	1	.
IPI00340123	Zzef1	isoform 2 of zinc finger zz-type and ef-hand domain-containing protein1.	324442	Q5SSH7-2,	0.86	9	AEAEQSILYAHCRR+AIHLLLR+CAAQALQNIAAISLAINYPNK+CVYMDNANEPHNVIILK+ELYTHLCNVVDKPNGNSMPMEILK+GDQEEELDRPVSSPGEAEQK+KAGEDLSIVK+LQFLFHSDSSNNEWGYK+QSLQLTFHSLCTYFSDK+RAADTEVRPLDYK+RGGIGAQCGLVFAYNSPSNK+RGLEAAEVNPESLAK+SDQATPESNPVTQK+VGLDWACSMAEILR+VNEATSVLYAR+WQPSRSLR	2	IPI00849568;
IPI00340244	4930430F08Rik	isoform 1 of uncharacterized protein c12orf29 homolog.	37418	Q8BHN7-1,	0.8	16	KMPCVFVTEVK+MPCVFVTEVKAEPSAKR+QNGKPVPDENGHIPGWVPVEK+VLATETLSEK	2	IPI00867859;
IPI00340401	Gltscr1	glioma tumor suppressor candidate region gene 1.	161354	.	0.94	699	CLLDVICDPQALNDFLHGSEK+ENMGNPGAAEGAQGRPR+LPSHGQSSSSSTSGTSAQPPPHLPTK+VDEATSGLIR	1	.
IPI00342057	Acsbg2	long-chain-fatty-acid--coa ligase acsbg2.	74319	Q2XU92,	0.92	28	EGVGEVCMWGR+EILITAGGENVSPIPIETLVK+NMLYNQNK+SVYRVLSCGKVLSGCK	2	IPI00875655;
IPI00345097	Upf2	upf2 regulator of nonsense transcripts homolog.	147553	.	0.89	9	ESLLNNK+KDQINIETK+LPWQDQEVK+LVATLHPCMSDVAEDLCSMLR+QEQEDYQEMLQSLAQRPAPANTNR+YNSIHCVANLLAGLVLYQEDVGIHVVDGVLEDIR+YSDFAPSLLQVWK	1	.
IPI00345558	Rgag1	isoform 1 of retrotransposon gag domain-containing protein 1.	138467	Q32KG4-1,	0.99	14	ASAPGTTTMPLMSPMTSGEMSMPLMK+ASDTAATPIQLMR+ASGMFMQQMTTAAFGATPTSLMR+HLSWSDAILR+MADMSIPLHSLR+MPSQAMNIQDSGGVSTPLMRPVALGGVQMR+SPASSTLSTLLR+SQGSGTMSTPLLR+SRPQMATACGDMCPLPVR+STSQMTATTSGGIFMPQTRLSGPGATSTPLMR+TSGSASTLLMR+VLGPAQFAAMTPGEMSKPLMR+VPASGNMSTSQK+VSSTGLMSTLPVRASDTAATPIQLMR	2	IPI00798568;
IPI00346104	Mast4	isoform 1 of microtubule-associated serine/threonine-protein kinase 4.	284052	Q811L6-1,	1	9	AGLAAPESPVRK+ALSVTAATGEPK+EDSASLLYEK+ELSNSASWQHGSSPSHTLK+GCSGHGAR+HLCMVMEYVEGGDCATLMK+LQSGGDGRSQMIKSDSLPSFR+LSAAPSLQK+SECVDSTDNSSKPSSEPTSHVARQR+SFSCLNR+SLSASALSLMIPGDMFAVSPLGSPMSPHSLSSDPSSSR+VSIIVHTEECPLDAK	2	IPI00677823;
IPI00346978	Spink5	serine peptidase inhibitor, kazal type 5.	114891	.	0.97	18	ALEQGAPTK+ENDPVVGPDGK+ESDPILGPDGR+GPDGAMHGNK+ITSGESSSGGNPKAKDECAQYR+NGTLTCPKGNNSSQSLNDIIFQSECILCK+NLNPVCGDDGQTYSNPCMLCHENLMR	1	.
IPI00347336	Zfp294	zinc finger protein 294.	198930	Q6A009,	1	36	DSGLHHGPMFDHLADTLSSWEAK+EEITTVLQDHLLK+EVLDDLTK+KEFSAQCIPAFLGWTK+LVALADCLCDK+RFEGVEDCMICFSVIHGFNYSLPKK+RLLCFLPNNELDSLEEKFK+WFTSSNKSTCPLCR	1	.
IPI00347698	Cgref1	cell growth regulator with ef hand domain 1.	35430	.	1	27	EGAEEQVEIKDNEGEAK+GQAESEGDVPGPR+HTESLPPALQEPQPAGSQPLLANSPLQSETQQSLGTK+LDPEVQQQLTPNPFQPGPEQLR+MEEDPEHMDR+VDTLSPEEEAR+VHEAGAPVAHSAAAAAPVSSR	2	IPI00661901;
IPI00348266	F9	coagulation factor ix.	52978	P16294,	1	43	NCELDATCNIK+SCEPTVPFPCGR+VICSCTEGYQLAEDQK	1	.
IPI00348531	.	novel protein similar to odorant binding protein ib obp1b.	19366	.	1	29	ATSENLVFYDENVDR+EITCDEGCQK+ELAHEDTCPE+IETSGPLELFVR+LLYILGK+QNGQCSLTTVTGYK+TTAIMADNIDK+TTAIMADNIDKIETSGPLELFVR	4	IPI00621231;IPI00886350;IPI00894816;
IPI00349306	Ppig	peptidyl-prolyl cis-trans isomerase g.	88325	A2AR02,	0.85	28	CLCTGEK+DFMVQGGDFSEGNGR+HNKEFLLSMANR+ILSCGELIPK	2	IPI00666350;
IPI00349401	Sf3b2	bone marrow macrophage cdna, riken full-length enriched library,clone:i830028h02 product:splicing factor 3b, subunit 2, full insertsequence.	98189	.	0.81	2	EMDDPSVGPKIPQALEK+IDIDYQK+ISLGMPVGPNAHK+LAQQQAALLMQQEER+TATVGGAMMGSTHIYDMSTVMSR+TGIQEMR+YGPPPSYPNLK	1	.
IPI00349520	Lrp2	low-density lipoprotein receptor-related protein 2.	519208	A2ARV4,	1	33	AFLCDGDNDCGDGSDENPIYCASHTCR+CEANEWQCANKR+CIPQHWVCDGDADCADALDELQNCTMR+CISQDWK+DCLDDTDEIGCPPR+DRTLCMPMCSSTQFLCGNNEK+EAVAVAPPPSPSLPAK+EFQCGSGECILR+KMLAQHCVDANNTFCFENPR+KSDGGDMTVVRR+NDCGDYSDER+QIISNLNNPR+QNSNIEPYLVFSNR+RQIISNLNNPR+SLHFDPQDHNLPFQAISVEGMAIALDYDR+SLHFDPQDHNLPFQAISVEGMAIALDYDRR+TCEDVNECDIPGFCSQHCVNMR+TLCMPMCSSTQFLCGNNEK+WLITTQLDQPAAIAVNPK	1	.
IPI00350458	Unc45b	isoform 1 of unc45 homolog b.	103638	Q8CGY6-1,	0.97	20	AGVISALACMVK+DRGTIVAQGGGK+GLVIAHNLLSADAELARK+GVMEMMVALCGSER+ICSLMALENEEMSLAVCNLLQAIIDSLSGEDKR+LQNAAAGALAMLTAAHK	2	IPI00788478;
IPI00351150	.	carboxypeptidase b1.	47574	.	1	7	LPENYEELNALVK+MLLLLALVSVALAHASEENFDGNR+QTCEETMLAVK+SPCSDTYCGPTPESEK+SPCSDTYCGPTPESEKETK+YSFTFELR	1	.
IPI00352163	Fn1	nod-derived cd11c +ve dendritic cells cdna, riken full-length enrichedlibrary, clone:f630118j10 product:fibronectin 1, full insert sequence.	253001	.	1	818	APITGYIIR+ATGVFTTLQPLR+CDPHEATCYDDGK+CDPIDQCQDSETR+CHEGGQSYK+CNDQDTR+CTCVGNGR+DAPIVNRVVTPLSPPTNLHLEANPDTGVLTVSWER+DDKESAPISDTVVPAVPPPTDLR+DLEVIASTPTSLLISWEPPAVSVR+DSMIWDCTCIGAGR+DTLTSRPAQGVITTLENVSPPR+DTLTSRPAQGVITTLENVSPPRR+EATIPGHLNSYTIK+EESPPLIGQQATVSDIPR+EINLSPDSSSVIVSGLMVATK+ESAPISDTVVPAVPPPTDLR+ESNPLTAQQTTK+EVTSDSGSIVVSGLTPGVEYTYTIQVLR+EYLGAICSCTCFGGQR+FGFCPMAAHEEICTTNEGVMYR+FLTTTPNSLLVSWQA…	1	.
IPI00352475	Pdap1	28 kda heat- and acid-stable phosphoprotein.	20605	Q3UHX2,	1	3	GVEGLIDIENPNR+QYTSPEEIDAQLQAEK	1	.
IPI00352528	Zan	zonadhesin.	579913	O88799,	0.96	13	ADMKPAGNSLLLGAAWK+APSACQEGCVCEPDYVVLNNK+CADSDMDDVWTK+CEVTSPSVPSSCR+CMTPCPASCAK+DAQGDLIPANK+DAQGGFVPAGK+DAQGVLIPAGK+DCTQSCACTGGAVQCQNFQCPLGTYCK+EGCICQPDYVLLNDK+EGCVCEPDYVMLNNK+EGCVCQPGYVLDKDKCILK+EGCVCQPGYVLR+EICTCESHNHILCKPWK+EPQFCPLVCPK+GCTQSCACVGGAVQCHNFTCPTGTQCQNSSCSK+GCTQSCSCMGGAIQCQNFK+IPLQCPAHSHFTSCLPSCPPSCANLDGSCEQTSPK+VCGVCGNFNGEEEDELMTPSGELAEDEQEFMNSWK+VCHPNTNMPFFMISAK	1	.
IPI00352565	Plekha8	isoform 2 of pleckstrin homology domain-containing family a member 8.	52732	Q80W71-2,	0.93	19	TLEECMQIANAAFTSELLYHTPPGSPQLAVLK	2	IPI00867768;
IPI00353420	Utrn	utrophin.	392706	.	0.99	15	EQAIILVNAR+ESLGELDK+EVAGPTEMCDQR+FYMLQQARR+LGEQIAVVHEK+LHDALMELQK+LHDALMELQKK+MISQQLEDLGRK+QLGEVAAFGGSNIEPSVR+QPDVIVEASGPEAIQIR+RLDEVTCWLTK+SCFQQNNNKPEISVK+VHALNNVNR+VLYNDLGAQVTEGK+WSTLVAEVEALQPRLKGESQQVLGYK	1	.
IPI00353672	Xirp2	isoform 1 of xin actin-binding repeat-containing protein 2.	428259	Q4U4S6-1,	0.97	9	AEQEAIHSSQEIIRR+AMPETESYDAVEIIRK+AQQTFEQHVK+CTINILEFLR+DDSEATVK+ENEDSLPPPSPPPLPPSNASSEIEFPLPPPPPLMLLPGK+ESVDAQEAVKK+EVHSVPGVTVSGK+GGDSPPTITIPVSVNHVVSGSFRESVDAQEAVKK+GTIPCSPGTPVPIVEK+GTIPCSPGTPVPIVEKR+QEHLQNQR+SFSANVMEESDVCTVPGGLAK+SHNIVPTVDYIQGGNVQMNK+TDVCLESQDFLMK	2	IPI00845587;
IPI00353681	Whsc1l1	isoform 2 of histone-lysine n-methyltransferase nsd3.	73380	Q6P2L6-2,	0.84	9	ELFESSLCGDLLNEVQASEHTK+LIISSPSQRSEKPAQSASSPEATSGSAGPVEKK+QPEEASSQAK	3	IPI00660619;IPI00663331;
IPI00354163	2810474O19Rik	isoform 1 of uncharacterized protein c12orf35 homolog.	169044	Q5DTW7-1,	0.91	24	DFKIHHSEASRTHSVSNNNK+EESHDLGMLDPEK+EGQELACHFSAK+EIVAEVKSPCDSQIPR+KTDHVIIPDVEIKK+MMSSSQTVLPVLIPSCESSGVAVGK+QPYSESVRPSGDGVQALVQNNQEK+TSKHSAAVSWGKLVEGQSISAETAK+VSIGQFSEVK	3	IPI00855039;IPI00855057;
IPI00354819	Myl6	isoform smooth muscle of myosin light polypeptide 6.	16961	Q60605-2,	1	30	ALGQNPTNAEVLK+DQGTYEDYVEGLR+EAFQLFDR+HVLVTLGEK+ILYSQCGDVMR+VLDFEHFLPMLQTVAK	2	IPI00409817;
IPI00355936	4930415L06Rik	putative smek homolog 3.	95416	Q3V0Y1,	0.98	92	HYIFSNNLLR+LGIMSVLK+QMICDFDPEFSQGIIMTAVLHELLNPENMR+YNMLNSAIIELFEFIR	1	.
IPI00355962	Bdp1	isoform 1 of transcription factor tfiiib component b'' homolog.	270790	Q571C7-1,	0.97	7	DTCPGEMGAEMIDIPMETEAGLK+EDCDTQLSLQAR+EEVAVESSTAEGK+EILTSQEK+EQIPSLTQNIDDIAGLAPSEETEMR+ESSESCAVALPVWEPGNTASADMAHAESSCSEGR+ETDMFFLAISMVGTDFSMIGQLFPHR+ETGEDDVSSMVVVLGEK+EVFLQENGPK+EVGPVSEPETGLQETGK+GEMETPLEEIGGGTSQR+KTKPNLTK+MDPIPSTCNQQDIMPLAR+SEDESCVVIPPQTENESHK+SEDESCVVIPPQTENESHKNLQCEDTVSEPGR+TAESCMGQGIFPTSESTHATSKPQK+TDESTALTAEDHLLQK	3	IPI00668664;IPI00894708;
IPI00356448	Cpa1	carboxypeptidase a1.	47385	Q7TPZ8,	0.86	1	ISATDEAQVQK+NWDAAFGMPGASSNPCSETYR+YSFTFELR	1	.
IPI00356462	Mmrn1	multimerin 1.	136091	.	1	7	CCPGYIGPNCQLK+DFAFMQENQPTWK+ETLSAMTYNPK+ISEHALETEDGLNK+LSPTVILDTGSHLPSGR+VEEQQQLAHSNQAESHTAVDQGR+YPPVTTFSGYLLYR	1	.
IPI00356530	.	similar to cadherin protein.	312680	.	0.99	18	ENVPTFILTVTASDQAVNVTDRR+EYCLLVQAKDR+GDASASLEVWVEVEGIDEFEPIFTQDQYFFSLR+INENPYR+ISSGDPEGK+KTPSSPDADPK+MNPNTGPGCTMFLLKMGCMQESGTRK+QSELINWLALDR+RESFTSGSQEGR+SPMLPDGESR+YLYTGLVTENCEPGTSVVTVK	1	.
IPI00356750	Gm94	uncharacterized protein unq472/pro839 homolog.	10038	Q3V2D2,	1	75	GSSFMELEGDPGQQPSK+SMSRGSSFMELEGDPGQQPSK	1	.
IPI00357683	4931408C20Rik	adult male testis cdna, riken full-length enriched library,clone:4931408c20 product:hypothetical protein, full insert sequence.	154175	.	0.81	7	LSQMAGSVPTGVPLK+MAFDNLLTPK+MSGMGPCPQR+MSSGHTSSEK+NDNVFPPLEVR+RALANSDMLSTFK	1	.
IPI00377289	Tbkbp1	prosapip2 protein.	66930	.	0.85	3	LEEALEAAQGEAR+RSPASPSCPSPVPQRR	3	IPI00648425;IPI00877274;
IPI00377298	Tra2a	transformer-2 alpha.	32579	Q6PFR5,	0.81	3	AHTPTPGIYMGRPTHSGGGGGGGGGGGGGGGGGGRR+ANPDPNTCLGVFGLSLYTTERDLR+EAMERANGMELDGRR+GFAFVYFER+RSPSPYYSR+SHSPMSNR+SYTPEYR	1	.
IPI00377351	Apoa4	apolipoprotein a-iv.	45029	P06728,	1	4720	AEVTSDQVANVVWDYFTQLSNNAK+ALVQQLEQFR+ANELKATIDQNLEDLRR+ATIDQNLEDLR+ATIDQNLEDLRR+EAVEQFQK+EKVNSFMSTLEK+ENVDNLHTSMMPLATNLK+ENVDNLHTSMMPLATNLKDK+GNTEGLQK+GSPDQPQALPLPEQAQEQAQEQAQEQVQPKPLES+KGSPDQPQALPLPEQAQEQAQEQAQEQVQPKPLES+KNAEELQTK+LGDASTYADGVHNK+LNHQMEGLAFQMK+LNHQMEGLAFQMKK+LQEHLKPYAVDLQDQINTQTQEMK+LQLTPYIQR+LVPFVVQLSGHLAK+LVPFVVQLSGHLAKETER+MMPHANK+MMPHANKVTQTFGENMQK+MQTTIKENVDNLHTSMMPLATNLK+MQT…	1	.
IPI00377728	Tomm70a	mitochondrial import receptor subunit tom70.	67521	Q9CZW5,	1	11	EAGGRGDASGLKR+ECLEDVTAVCILEGFQNEQSMLLADK+ENSGYLK+MAASKPIEAAMAAAAAPGSGNGVGGGGGTAGPGSGAGTLPR+NVDLSTFYQNR+QAYTANNSSQVQAAMK	2	IPI00751137;
IPI00377729	Zfyve16	zinc finger fyve domain-containing protein 16.	166670	Q80U44,	1	11	CISTCASSEACCEDANETFLEGK+EQCLSNSNTMSAGENVNDSQLQMNQITMK+ESLVLGQK+KESLVLGQK+RCSKPVCDLISDMGNLVHATNSEEDIK+RVWFADGILPNGEVADTTKLSSGSK	1	.
IPI00377925	Atg2b	isoform 1 of autophagy-related protein 2 homolog b.	231399	Q80XK6-2,	1	13	FPIPDLR+KLDSQNK+SDSDGEQTAPR+SPGADVTCSLPR+TASDGVGGDNLNMLSVAVK	1	.
IPI00377933	Pcsk9	proprotein convertase subtilisin/kexin type 9.	74823	Q80W65,	1	14	ALNAFGGEGVYAVAR+CDSHGTHLAGVVSGR+EPTLTLAELR+GTSLHSLR+GTVSGTLIGLEFIR+TGVVLVAAAGNFR+TVWSAHSGPTR+VTITDFNSVPEEDGTR	1	.
IPI00378026	Btbd14b	btb/poz domain-containing protein 14b.	56537	Q7TSZ8,	1	18	EAGGSGGNNGSR+ESEMNAIAADMCTNAR+MPQPLSMATATAAVAVVAVGGCVSGPSMSER	1	.
IPI00378205	Rev3l	dna polymerase zeta catalytic subunit.	350659	Q61493,	1	13	ALHEIQNLTLISVELHARTRR+CPHTLSSSAHTK+EVFLSLPQANSSDWIQGHNRK+HIPCVSLNCPVLFK+ISLPHPMEIGENLDGTLK+KETSQIDGPSLNNTYGFK+KETTLIQK+KVNYETEDSESSFVTQNSK+LDIEAQIGGNPGLQAIWEDEK+LSVRPSIFHK+RDSCPAVSK+TVTHQDIR+VFGATPAGQK+VNYETEDSESSFVTQNSK+WDPLCLHSTPVMQRK+YPIYPLTPK	1	.
IPI00378360	Bbs1	16 days neonate thymus cdna, riken full-length enriched library,clone:a130046p20 product:bardet-biedl syndrome 1 homolog (human), fullinsert sequence.	65094	.	0.8	11	ADVPLSVQSLR+ALLNVIHAPDAVTSLCFGR+ELLVLDPEAFTILAK+LVVGDLGPGGQQPR+LWTVQMPAAILTMNLLEQR+MAAASSSDSDSGR+QTVITTMTTLK	1	.
IPI00378438	Tns1	tensin 1.	201383	.	0.99	13	AASQQEIEQSIETLNMLMLDLEPASAAAPLHK+AVNPTMAAPGSPSLSHR+DSSGPANSTTDLLK+QGAACNVLFVNSVDMESLTGPQAISK+RMSVGDR+SHPGGGPTVPSPGR+TDEPVSGATTAPAALSPQEKKELDR+VCSFSCHRK+VIPVHSSHSAPIRPSYSAQEGLAGYQR+VKPCGICR+VLEFGWPDLHTPALEK	1	.
IPI00378509	Dnahc17	isoform 1 of dynein heavy chain 17, axonemal.	511603	Q69Z23-1,	1	16	CYITLTQSLHLIMGGAPAGPAGTGK+DRPPVPWEFPSSLAFSR+ECDLSGQVEVWLNR+EEVSSLVIGAMK+EGDYDGLVEVMGHLMK+EIPESAEK+ELWDMIVMVNTSIDDWK+ELYELYFVFACFWAFGGAMFQDQLIDYR+GLQGEIEEVLGNISLSVSVLKGLFQAYDFCCANMK+IVTDDLPVFMGLIGDLFPALDVPR+KLVESEAPEK+LIFLAQVTFQVLSMKK+LMNLQCIHEQLNRPK+LSTADSVISIWFEVQR+QNVEGITQAMQEWSANPLFER+QSIVELK+QTLLNTIK+RLATIFCQAFDDCNCMESSAK+SFGSPPDAVVNVTAAVMILTAPGGKIPKDK+VNKIVEILEKAK+WAESVENFK+YFIDLLMEK	3	IPI00828284;IPI00896079;
IPI00378681	Ubr4	isoform 1 of e3 ubiquitin-protein ligase ubr4.	572290	A2AN08-1,	1	22	AFMAVCIETAK+ALSVLGCGHTSSTK+AMEEFFSDGGELVQIMMATANEDLSAK+AQQELLLDLMWSIWPELPAYGRK+AVWLPGSQTELAIVTADFVK+CLPIRGVDGNGKSPSK+EDYLAVCGLK+ELFDYNLRR+GVEMTDQLMVPTLGSQEGAFENVR+HRLNSTGMYVANTKPGGFTIEISNNSSTMVMTGMR+KAMEEFFSDGGELVQIMMATANEDLSAK+KVPTSNTEGGWSCSLAEYIR+KVQLTPGQTEVK+KVWCATNEGEPMR+LCSIIYPEENEVTEFFVTLEK+MVDGVGVCTVCAK+QGMKPEHAGSLIELAASK+QLMCLLTR+SFAATVSR+SSICESSSLISSATAAALLSSGAVDYCLHVLK+TSPADHGGSVGSESGGS…	4	IPI00648709;IPI00845523;IPI00848562;
IPI00378796	Adam22	isoform 19 of adam 22.	93893	Q9R1V6-20,	0.94	12	CLPVASFNFSTCSSSK+CTLTQDSQCSDGLCCK+LNIEGTEK	21	IPI00379467;IPI00404650;IPI00515160;IPI00515396;IPI00515509;IPI00515580;IPI00515604;IPI00515681;IPI00623219;IPI00627016;IPI00749834;IPI00752301;IPI00752334;IPI00752342;IPI00753070;IPI00753519;IPI00753532;IPI00753983;IPI00754961;IPI00755165;
IPI00380136	Loxl1	lysyl oxidase homolog 1.	66506	P97873,	1	76	ASFCLEDSTCDFGNLK+CLASTAYAPEATDYDLR+EVAVGDSTGMAR+GAGGGMGAGAAAVASAGVIYPFQPR+GLPDLVPDPNYVQASTYVQR+LGWYPPYAANVPPEAYVPPR+LSVGSVYRPNQNGR+NQGTADFLPNRPR+QAPSLPLPGR+TYEQGYVYYR+TYEQGYVYYRGAGGGMGAGAAAVASAGVIYPFQPRAR+VLEPPYLPVR+VLLAGAPQTSQR+YIVLESDFTNNVVR+YVSTTNCK	1	.
IPI00380178	.	ig lambda-3 chain c region.	11482	P01845,	0.96	2	SHNSFTCQVTHEGDTVEK	3	IPI00756700;IPI00855114;
IPI00380180	Gm98	gm98 protein.	102382	.	1	7	APSPPWPPQGPLSPGTGSLPLSIAR+ASNPGQFESDSDVLWQR+HSGPGQMAPLPVTNIR+MEVVDETEALQR+NSPSFNLQSR+QEPGTVTALPPHPAR+SLEPLASPVVPFPGGQSK+SSPAVPDQACISQR+SWGISANGISYSK+VMGSLMHPSDLR	2	IPI00653569;
IPI00380195	1700012G19Rik	phosphoglycolate phosphatase.	34541	Q8CHP8,	0.98	3	FIFDCVSQEYGINPER+MVPDFYVDSIADLLPALQG+TILTLTGVSSLEDVK	1	.
IPI00380460	Dsg1b	desmoglein-1-beta.	114454	Q7TSF1,	1	8	KLADISLGK+QEPSDSPMFIINR+TMNNFLDR+VMDINDNPPVFSMTTFLGQIEENSNANTLVMK	2	IPI00468647;
IPI00380709	Plekhg2	isoform 3 of pleckstrin homology domain-containing family g member 2.	146060	Q6KAU7-3,	0.87	117	EAGTSVQGFPEELEYR+LSESPSESR+QVLLENSLHCAPK+SEDFDIYTLYCMNYPSSLALLR	5	IPI00454036;IPI00845585;IPI00894679;IPI00895052;
IPI00380722	Bat2	large proline-rich protein bat2.	229203	Q7TSC1,	0.98	11	DSQSAAAEEPETDGK+EEPPQLSGPEAGR+ETPPGGNLSPAPR+FPLEESAPPGPRPLPWPPGNDEAAK+KQSSSEISLAVER+QNRRPGTGGKTGSGGGSSGGGGAGPGGR+QPPSQGLGYPK+RPGTGGKTGSGGGSSGGGGAGPGGR+RSFSSQRPGMDR+SLEIQKPAVAPR+TGSGGGSSGGGGAGPGGR	1	.
IPI00381303	Man2b1	lysosomal alpha-mannosidase.	114604	O09159,	0.99	1	ATFDSGTGLLMK+LLAEQEVLAPQVVLSLGGSSPYHSR+MGTGPLTSGVR+QNFSFCR+VAWHIDPFGHSR+WMTNTGPTSFPEPSK+YLCWDVLCTDPPVVDNPR	1	.
IPI00387232	Nsfl1c	isoform 3 of nsfl1 cofactor p47.	40953	Q9CZ44-3,	0.99	5	ASSSILINEAEPTTNIQIR+DLIHDQDEEEEEEEGQR+EANLLNAVIVQR+EFVAVTGTEEDR+LAHGGQVNLDMEDHR+LGAAPEEESAYVAGER+SPNELVDDLFK+SYQDPSNAQFLESIR+TGFSLDNGDLR	2	IPI00399449;
IPI00387338	Igfbp2	insulin-like growth factor binding protein 2.	32847	.	1	56	CYPNPGSELPLK+EPGCGCCSVCAR+GDPECHLFYNEQQETGGAHAQSVQ+GECWCVNPNTGKPIQGAPTIR+GPLEHLYSLHIPNCDK+LAACGPPPDAPCAELVR+LAACGPPPDAPCAELVREPGCGCCSVCAR+QEGEACGVYIPR+TPCQQELDQVLER+VGTTPQQVADSDDDHSEGGLVENHVDGTMNMLGGGSSAGR	1	.
IPI00387416	Ubqln2	ubiquilin-2.	67379	Q9QZM0,	0.91	2	GPAAAPGAASPPAEPK+QLIMANPQMQQLIQR	2	IPI00889833;
IPI00387422	Zyx	zyxin.	60546	.	1	12	EKPLVQEK+FSPGAPSGPGPQPNQK+GPLSQAPTPAPK+MVPPDAPSSVSTGSPQPPSFTYAQQK+SPGGPGPLTLK+VNPFRPGDSEPPVAAGAQR	2	IPI00408218;
IPI00387510	Rgmb	rgm domain family member b.	47181	Q7TQ33,	1	4	DGPTSSTNPEVTHDPCNYHSHGGVR	2	IPI00474405;
IPI00395100	EG386551	try10-like trypsinogen.	26531	.	0.98	49	DSCQGDSDGPVVCNGQLQGIVSWGYGCAQK+ITNNMICVGFLEGGK+LGEHNINVLEGNEQFIDAANIVKHPKFK+LSSPVTLNAR+TLDNDIMLIK+VCNYVDWIQNTIAAN	1	.
IPI00395209	Ifnar2	interferon receptor 2 isoform b precursor.	27755	O35664-3,	1	121	CIVLQPGQESGMAR+LILSWELENK+SSCDVTDKWLEGMESYVVAIVIVHR+TTPFVIK	1	.
IPI00396779	Bahcc1	bah and coiled-coil domain-containing protein 1.	282591	Q3UHR0,	0.8	3	EDLQDGLPVLIPK+ELLLQDNK+EVAGPVEPGPAFSECLERR+GLPAGLGAFQRK+HLDAAMATDHGAPYGVSYAHLK+HMELEEAAQEK+ISAFLPAR+KAVAAAAAAAGGK+KSAMLQPVLRR+KSCGQAELPSSVAHK+KSVELASLGYSGHHMPPWGVQTGHDTSMAIIEER+LVPPMPAEGPCK+LVPPMPAEGPCKEAGPAPR+NLPPQPTILPANHNFPGVPR+SCGQAELPSSVAHK	1	.
IPI00396805	1810020D17Rik	isoform 1 of upf0366 protein c11orf67 homolog.	13244	Q8R0P4-1,	1	3	ETGTEHSPGVQPADVK+EYNALVAQGVR+VPPSTVEYLEK	1	.
IPI00396840	Ece1	isoform b of endothelin-converting enzyme 1.	87073	Q4PZA2-1,	0.97	1	ATFAEDSK+CPPGSPMNPHHK+TPESSHEGLITDPHSPSR	5	IPI00648026;IPI00762055;IPI00762815;IPI00850812;
IPI00399663	Cenpe	centromere associated protein-e.	286525	.	0.86	9	AQNLQDPVPK+KMQTDLDK+KVQELCEK+LNTQLEESQEEMK+MDGIDEQNESAHTLLGGGK+RMLVTSSSIALQQELEIKR	1	.
IPI00399798	Cd97	isoform 1 of cd97 antigen.	90413	Q9Z0M6-1,	1	12	ASLEDFYGSPIPSVSLK+CPGLLVVCILLSLSGAGTQK+FDFTSVESIEPR+GPDTICQEPPFPTWTLLPTAHSQTLLR+GPFTYTSPSNTELSLMVK+LGGYSCICR+LLGNTPLNLEQR+LLSNINSVFLTNTNTEK+TLAQFLPK+WACMVTGSK	2	IPI00399800;
IPI00399971	Pcdh7	protocadherin 7 isoform 1.	136772	.	1	17	DENDNVPSIEIRK+DQGENGVVTCTVVGDVPFQLKPASDTEGDQNK+ECDEYGHSDSCWMPVR+ENLQPNSPVGMVTVMDADK+FTVMARDRGQPPK+LDAPEGGGGTSPSGR+LSIVIGVVAGIMTVILIILIVMMARYCRSK+NAEIAYSLDSSVMGTFAIDPDSGDILVNTVLDR+RLDAPEGGGGTSPSGR+RLGPADSAPYPGGGGNSASGGGSGGSK+RVTFSVVSQPQDPHQGSLQSCYDSGLEESETPSSK+TVVATVLATDSDDGINADLNYSIVGGNPFK	1	.
IPI00400016	Lamc1	laminin subunit gamma-1.	177298	P02468,	0.93	8	ADAAKALAEEAAKK+ATAESASESLPCDCNGR+AVEIYASVAQLTPVDSEALENEANK+CDCHALGSTNGQCDIR+EAEREVTDLLREAQEVK+EGFFGNPLAPNPADK+EVVCTHCPTGTAGKR+KQDDADQDMMMAGMASQAAQEAELNARK+LNEIEGSLNKAKDEMK+LTGECLK+NTIEETGILAER+QLEEAENELKR	1	.
IPI00400044	Pask	pas domain-containing serine/threonine-protein kinase.	151278	Q8CEE6,	0.99	17	AKPWFEESPTPAELEGLAACEGEYDYK+EDPSAAESYR+EELQTCLIK+FQEMGAGHDR+GLASGCSGSLLSTPVCNPNK+GQDSAPSPSGMACVLLGTPTLDEPWPGVR+NISEESPLTHR+TNQPESGLLSAASLEIGSR	1	.
IPI00400202	Kng2	kininogen 2 isoform 1.	71272	.	1	927	ATSQVVAGTNYVIEFIAR+CPGRPWKPASWK+DIPVDSPELK+DSEEAATGECTATMGK+DSEEAATGECTATMGKK+ENKFFIVTQTCK+ESNTELTEDCEIK+EVLGHSIAQLNTENDHPFYFK+FFIVTQTCK+GDCVALPNGDGGECR+GLAWQDCDFK+GLAWQDCDFKDSEEAATGECTATMGK+GNAFLDTDNK+GPIVTEEYHCASCVHPISADNPDLEPVLK+HLGQSLDCNANVYMRPWENK+IEDFTQSCDLHPGDDLVEALPKPCPGCPR+KATSQVVAGTNYVIEFIAR+LQSGNQFVLYR+MDGSATFYSFNYQIK+RPPGFSPFR+RRPPGFSPFR+VQETKAGTTVSPPYIVREQK	1	.
IPI00402967	F13a1	coagulation factor xiii a chain.	83207	Q8BH61,	1	36	AVPPNNSNAAEVDLPTEELQGLVPR+CGPASVQAVK+ETLQNVWIHLDGPGVMRPK+GAAMVGSDMVVTVEFTNPLK+GTYIPVPVVK+KLIASMTSDSLR+LIASMTSDSLR+MSDTPASTFGGRR+RAVPPNNSNAAEVDLPTEELQGLVPR	1	.
IPI00403232	EG624367	15 days embryo male testis cdna, riken full-length enriched library,clone:8030438d22 product:glyceraldehyde-3-phosphate dehydrogenasegapdh homolog.	21769	.	0.8	6	CLEKPAK+LTGITFHVSTPNMSTVDLTR+MGSLSSTGSPSPSSR+MTPSMANSMAQSRPR+VIISAPSADAPMFVMGVNQEK+VVSTASCTTNCLAPLAK	1	.
IPI00403352	2610207I05Rik	isoform 1 of serine/threonine-protein kinase smg1.	409742	Q8BKX6-1,	1	11	ACECYISIADWAAVQEWQNAVHDLK+ATVLASSYDTAWK+AVLEELMEATPPNLLAK+EAALQAQKAQDSYQTPQNPSIVPRPSELYYSK+KVVDNASQGEGVR+LHALSQIETSIGTVQEKLAALEASIEQRLK+LNAGQVLLDEDDPR+LSNLLRR+MLHAQYGELIQPR+MTQNIETALGVTGVEGVFR+QEGACCLGLLCASLSYEAEK+RASYILR+RLETSISSCK+RNLMMEGAASSAGEQLVDLTSR+SHLMELGLTAAK+TTTAQDLVQHFK+WQSLTENVVKYLK	1	.
IPI00403353	Smarcal1	isoform 1 of swi/snf-related matrix-associated actin-dependentregulator of chromatin subfamily a-like protein 1.	100840	Q8BJL0-1,	0.8	10	EWPLLVVVPSSVR+FEVDIGYSEAVIGLFKQMESR+IDGSTPSADR+IGYNQELIAVFK+LLLEEAIMLRR+LSTVSLKPLDEAGGSVGGQTSLPSAPSLTFVTGK+LVSSLMPFQR+QGSLLNLLAEPSKPVGHASIFK	2	IPI00553252;
IPI00403386	2310040C09Rik	11 days pregnant adult female ovary and uterus cdna, riken full-lengthenriched library, clone:5031431m05 product:hypothetical protein, fullinsert sequence.	23883	.	0.84	2	ASVYMQPPIDGQPHIKEVVR+LALEALVAR	2	IPI00458515;
IPI00403414	Gtf3c1	isoform 1 of general transcription factor 3c polypeptide 1.	237476	Q8K284-1,	0.88	76	CTMVEAFSR+DGLDTSSSSELNAPFDPHSMDSHSGDIAVIEEVR+EVVDEGLVPGDGLGAAGLDSSFYAHLK+GYYTVPGMVSTR+KEQESAMDK+KNAVIVDTTICDPHYNLAHSSRPFER+MDALESLLDEVALEGLDGLCLPALWSR+QQLLYKR+RPMPLGSGGSGR+RVSHSQGPK+VAASPRPGAEEQAEAQAPAQLAAPEDADAGGPR+VVSLPLQEIHPECGPCK+YEEIDLETGILESR	3	IPI00416203;IPI00875467;
IPI00403538	ENSMUSG00000066715	adult male corpora quadrigemina cdna, riken full-length enrichedlibrary, clone:b230364i19 product:hypothetical glycine-rich regioncontaining protein, full insert sequence (fragment).	14234	.	0.99	5	GGGQAAGQAGASGAEPR+GLRGGGQAAGQAGASGAEPR+GSGGGGGGGGGAGCLSR+GSGGGGGGGGGAGCLSRR+KGSGGGGGGGGGAGCLSR+KGSGGGGGGGGGAGCLSRR	1	.
IPI00403650	Prss2	anionic trypsin-2.	26204	P07146,	1	63	HPNYNSWTLDNDIMLIK+LASPVTLNAR+LGEHNINVLEGNEQFVDSAK+VCNYVDWIQNTIADN	1	.
IPI00403938	Tnc	isoform 1 of tenascin.	231807	Q80YX1-1,	1	13	APTAQVESFR+CVNGQCICHEGFTGK+EFTATEVQSETALLTWRPPR+EQCTMGTGCCLQPAEGR+EVIVGPDTTSYSLADLSPSTHYSAR+ITAQGQYELR+LEELELLVSSLR+LTPGVEYRVSVIAMK+RPETSYR+VDLQDHGESAYAVYDR	5	IPI00420656;IPI00785310;IPI00785346;IPI00785360;
IPI00403993	Syne1	synaptic nuclear envelope 1 isoform 3.	1009926	.	1	30	AACDEINGHLMEAR+AEGSVEEAENVMK+DHAAEIEKK+DLEGGISELK+DLQEQMEQAQQGGQAGPGQEELR+EGQQAIQDQLEMLKK+ELCEWLTQMESK+ELFMEVK+ELHPTPSAHPSVVMMTAGR+ENLEDAFTIAETQLGIPR+EYFQGLESHMILTEILFR+KAHLFAK+KPPMVVDDLFEDMK+KWLAEVSHLPLSGLGNIPVPLQQVR+LLAEATSHQESIEK+LVAPDLLEMSSLETITQQLAHHK+NEIVPIDSTLDPETLQDHHK+NVATKIDK+QSPPPGMAQHLLMDHLAICSELEAKQVLLKSLMK+RYCQEVFGR+SEPLDAAVIEEELDELRR+TSVTSLLDGLSQAFGEASSQSGGTDR+VYHSLAGSLQDSGILLKR+WD…	1	.
IPI00404052	Mpdz	isoform 2 of multiple pdz domain protein.	215148	Q8VBX6-2,	1	7	DQGGLGIAICEEDTINGVMIESLTEHGGAAKDGR+EDAFLCSPHACK+FSENSGLGISLEATVGHHFIR+GAVEETPASSSLGITLSSSTSSTSEMR+GSSSLGMTVSANK+GSSSLGMTVSANKDGLGVIVR+KLEPSGIFVK+RGDQIIAVNGQSLEGVTHEEAVAILK+RPSQSSQVSESSLSSFTPPLSGINTSESLESNSK+SLGISIVGGR+SVLQSPLFSQILNLQTSLQQLK+TILPGGVADQHGR	5	IPI00466594;IPI00474705;IPI00608031;IPI00876426;
IPI00404394	Lrrc33	isoform 3 of leucine-rich repeat-containing protein 33.	80061	Q8BMT4-3,	0.9	23	HLPDGFLKK+LDDSIFEGLEHLVELDLQR+LHTLLLQDNNMGFYR+NYIFEIEGGAFDGLTELR+TVADLSMVTCNLSSK	3	IPI00654975;IPI00655228;
IPI00405006	Smgc	isoform 2 of submandibular gland protein c.	74383	Q6JHY2-1,	1	8	NEPADPGVSGR+SNVSTGGEPSDKNEPADPGVSGR+VSGDDPTVQGHDVAASDGSK	4	IPI00556678;IPI00652248;IPI00757039;
IPI00405058	Hnrnpa2b1	isoform 3 of heterogeneous nuclear ribonucleoproteins a2/b1.	32460	O88569-3,	1	24	DYFEEYGK+EDTEEHHLR+GFGFVTFDDHDPVDK+GGGGNFGPGPGSNFR+IDTIEIITDR+KLFIGGLSFETTEESLR+LFIGGLSFETTEESLR+NMGGPYGGGNYGPGGSGGSGGYGGR+NYYEQWGK+QEMQEVQSSR	5	IPI00622847;IPI00828488;IPI00853914;IPI00890022;
IPI00405227	Vcl	vinculin.	116717	Q64727,	1	12	AIPDLTAPVAAVQAAVSNLVR+AVAGNISDPGLQK+EAEAASIK+ELLPVLISAMK+LVRGGSGTK+MALLMAEMSR+MTGLVDEAIDTK+QVATALQNLQTK+RMALLMAEMSR+SLGEIAALTSK+TISPMVMDAK	1	.
IPI00405543	AI182371	novel anaphylotoxin-like domain containing protein.	41551	.	1	551	CCYDGAR+FQNTAILTIQAK+IGPICVK+INEQASTYK+ISIMPTIDLQPEVEK+LEIVPIIYDNDSLFVQTDK+QEAHGMCLHQPTECLR+QLSEGQNSFSNSYLEVVSK+SVYTPQQPVK+TGTTYFEVK+VYSVNDDLEPATR+YNIHETCVQR+YREDASK+YSFSTVNLSPENK	2	IPI00876124;
IPI00405756	Rasal2	ras protein activator like 2.	144587	.	1	7	GENSFLQATVAKLGPLPR+KDHAEMQAVIDAK+LAGSQLSITQVASIK+NKEELACALVHILQSTGR+NNYVGLVNIPTASVTGR+QNSTGQSQIRK+QQTQQVQSPVDSATMSPVER+WMENLR	1	.
IPI00405760	Sfrs14	putative splicing factor, arginine/serine-rich 14.	118103	Q8CH09,	1	26	EDQASTPGLSQASSGSCFPRK+EGHGLGSLGK+EPVSVGALSEGEGLGADGPEQK	2	IPI00885847;
IPI00406086	1110012J17Rik	isoform 2 of uncharacterized protein kiaa0802.	158849	Q3UHU5-2,	1	75	EEGGESTPVR+GPAASVPLQEELKSAR+GRSPSPLGVGSETFR+REGPVGGESDSEDMFEK+SGSFLCSRR+SLGELDSSAEGK+SLYGDVDSPLPTGEAGGPPSTR	3	IPI00624581;IPI00761706;
IPI00406193	Iqgap2	iq motif containing gtpase activating protein 2.	180528	.	0.84	2	AFLYEQTESVVK+DDYKALVGSENPPLTVIR+QSDHILTALK+QSQAVIEDAR+TLDTLLLPTANIR+YMNPAIVAPDGFDIIDMTAGGQINSNQR	1	.
IPI00406419	Pepd	xaa-pro dipeptidase.	55029	Q11136,	1	6	DGDICLFDMGGEYYCFASDITCSFPANGK+KNGAVQAASAVVLQGGEEMQR+NGAVQAASAVVLQGGEEMQR+QESFFHWAFGVVESGCYGVIDVDTGK+TVMSTMKPGVWWPDMHR+VPLALFALNR+YAVDDVQYTDEIASVLTSR	2	IPI00874597;
IPI00406450	Heg1	heg homolog 1.	115201	.	0.96	2	ELPEEGTVHTQVAGTWVSR+GVSAALESLPESPSSSR+ITPSQTESGTSLGFLER+MDHSCR+QASHPALEPGEPTVLSQK+TLLPVAGPLSPPGAGHTAPGPGVATR+TPHTSAMSTR+TSSDHTDHGYVPSTFTK	1	.
IPI00406571	Dnahc3	similar to axonemal heavy chain dynein type 3.	468748	Q8BW94-1,	1	27	DMIAPENEEVMMR+EANAAAAISQAIK+GFDVMFLR+KGLFGPPIGKK+KSNDQIAQIVELVR+LCLMSGEIIQMSSK+LPLLPHEYK+MSDTNCSAQK+NVSSACEGLCK+QWIDHGYWFDK+QWIDHGYWFDKK+RDQAEMDLIK+SLFEKDKLLFSLLLTVGLLK+SVLTAAGNLK+TQTISLGQGQGPIAANMINK+VIPGSVDFSLSNTLGDPIK	2	IPI00880351;
IPI00406603	F5	coagulation factor v.	247230	.	1	305	ADKPLSIHPQGIK+AEVDDVIQVR+EVVVTGIQTQGAK+FNPLVVVGLSR+FSEGASYADHTFPAER+GSYEIIAANGEDTDVDK+IDEDYAEDDFVTYNDPYR+KFNPLVVVGLSR+KLALHSPLSPR+KPSDLPTFSGVGHK+LALHSPLSPR+MLLVCPCFFLLVVLGTR+MPMGLSTGVISDSQIK+NLPMDMR+NPDTIAAWYLR+QEEENSGFQK+SEEDIPSELIPLK+SLPDYNQYSK+SLSSEMYVK+SQHLDNFSNQIGK+SSNSGLLGPTLYAEVGDVIK+SWWGDYWEPSLAR+SWYIEDNINK+TLPGSGATVAGTLLR+TSSPDLGQVPLSLDDNQK+TSSPDLGQVPLSPDDNQK+TSSPDLGQVSLSPDDNQK+TTSPDLGQV…	2	IPI00848422;
IPI00406741	Mtap4	isoform 4 of microtubule-associated protein 4.	94517	P27546-4,	0.82	5	AKPLATTQPAK+ANIKHKPGGGDVKIESQK+EELPSDLLPPTSSPMPSPMPRK+NGLVSSCSVTGVMSDNSGQLNNK+QPAALTAALAAEDEQLSK+QPAPTTSGGLNK+RTSPSKPSSAPALKPGPK+SPATTLPKRPTSIKTEGKPADVK+VGSLDNVGHLPAGGAVK	1	.
IPI00406778	L1cam	l1 cell adhesion molecule.	140431	.	0.99	9	AQLLVVGSPGPVPHLELSDR+EAAGGNDSSGATSPINPAVALE+EATQITQGPR+EGGTMALFGKPDFGNISATAGENYSVVSWVPRK+FQLQATTQQGPGEAIVR+INGMSMETVNK+YDIEFEDK+YEIHLIK	4	IPI00785371;IPI00831568;IPI00875089;
IPI00407262	.	adult male testis cdna, riken full-length enriched library,clone:4931436f15 product:hypothetical protein, full insert sequence.	25261	.	0.88	7	DPAVPTQPAEFR+QQRPAGSEAAASGAGSR+QQRPAGSEAAASGAGSRAACR+RQQRPAGSEAAASGAGSR+RSLPASTAPPWPAAR+WPDAGESGGR	1	.
IPI00407502	C1r	complement c1r-a subcomponent.	80073	Q8CG16,	1	59	ALDEFTIIQDPQPQYQFR+DIWVATGIVSWGIGCGEGYGFYTK+DTSPFSQNMFCSGDPAVQQDACQGDSGGVFAVR+FCGQLDSPLGNPPGSK+GGGALLGDR+GIYTCTAQGIWK+GQPARPGNFPWQAFTTTHGR+LPVADSEACQR+MLVFLGHTNVEQIK+QRPPDLDTSSNAVDLLFFTDESGDSR+VIIHPDYR+VLNYVDWIK+WILTAAHTIYPK	1	.
IPI00407541	Lifr	isoform 2 of leukemia inhibitory factor receptor.	81287	P42703-2,	1	635	CTTNNMR+DRFHSCHPLETTNVK+DVSLIPETPEILDLSADFFTSSLLLK+EIICSWNPGR+EWSDWSPLK+EWSSDGK+FHSCHPLETTNVK+GAEDSTYHVAVDK+HDPNMTCDYVIK+HLTTEATPSKGPDTWR+IASMEIPNDDITVEQAVGLGNR+IFLTWR+INLLCQIEICK+IPALSPGDHEVTINYLNGFQSK+ITGLVGPR+LNPYTAYTFR+LSCETHDLKEIICSWNPGR+NDYIISVVAR+NLIVYWKPLPINEANGK+NPLGQAQSAVVINVTER+NSAGSSPPSK+NTETNVFPQDK+NTEYTLFESISGK+SEPCLLDWR+SIIGYVEELEA+TEPVALVLLNTMLSGK+VWDCTWPAPLGVSPGTVK+WHIDSPHFSGYK+Y…	1	.
IPI00407657	C8a	complement component 8, alpha polypeptide.	65393	.	1	252	AALGYNILTQEEAQSVYDAK+ALDQYLMEFNACR+AVTPQAVSCQLSDWYK+CIGGGIGIGIK+CQCSMGR+DSTIEGVGISGEFCENSGDGDR+FGGTICSGDIWDEASCDSPTPCLR+FINDYGTHYITSGTMGGIYEYVMVLDK+HLVCNGDNDCLDGSDESDCEDVR+ITGVEDIISR+KITGVEDIISR+NNIVLDEGMLQSLMELPEQFNYGMYAK+QAQCGQDFQCR+SHSAGVTVGVAPVK+SPVSIEVTGSGSK+VTEDDCHQYEPIPGSER+WTDCFPCQDK+YNPVVIDFEMQPIYQLLR+YYGGQCETVYNGDWR	2	IPI00453977;
IPI00408125	Rif1	isoform 2 of telomere-associated protein rif1.	263480	Q6PR54-2,	0.81	5	GATALEMGMPLLLQK+SEVFPVSK+TYDTDASEAVSEIQGPCSENHSPAEDPGLSECK	3	IPI00421167;IPI00626173;
IPI00408258	Btbd12	btb (poz) domain containing 12.	172412	.	0.95	15	DEEVGVTASQAAIQAADTEEAVR+EAGLQHGEEGQLGNQSALGCR+EPQLPLELPK+LSDILDAQCITFTTAAARK+TSLDEDSATDTSWLVPATPGVSR	1	.
IPI00408347	Zfp759	regulator of sex-limitation candidate 8.	82855	.	0.9	13	ISHTDQKPYK+KVFWSPSSLPEQKR+SFCFSSLLSEHKR+SQVAISMYSGGNSSTCK+YETCSK	1	.
IPI00408664	Atad5	isoform 1 of atpase family aaa domain-containing protein 5.	203909	Q4QY64-1,	0.94	18	CSMEERQQFMRAFR+EDGGLSDCVESSASVSLYK+KLPPSSPK+MVGVLSMAAAAAPLPVK+MVILDDSDLFDTGLDFSGELPSLSPAPSLSVEDNIRR+QPELENSLSDPENEQPVQK+RDFLMSGLPDLLKR+SNALLNSENLVCEDTAHDSVQMSLCNR+SVHEGDSSSEK+VEEIPDPAVPACVPSGPGEAVK+VSSQGCLQSHADR	1	.
IPI00408687	Retnlg	myeloid cysteine-rich protein.	12535	.	1	8	ELLANRDDCPSTVTK+LASCPSGMTVTGCACGYGCGSWDIR+TFSCTSITASGR+TTTCSLLICISLLQLMVPVNTEGTLESIVEK	1	.
IPI00408850	Ctbs	isoform 1 of di-n-acetylchitobiase.	41295	Q8R242-1,	1	38	DQQAPYYNYK+EQTQEMWGALKPR+FHQVWYDNPQSISLK+GAPCSDAAGHQVPYK+HRPDFEVFVFDVGQK+SYDWSQITTVAAFGK	1	.
IPI00408961	Haao	3-hydroxyanthranilate 3,4-dioxygenase.	32804	Q78JT3,	1	22	AQGSVALSVTQDPAR+DLGTQLAPIIQEFFHSEQYR+FANTMGLVIER+QGEIFLLPAR+RLESELDGLR+YYVGDTEDVLFEK	1	.
IPI00409035	Col15a1	collagen alpha-1(xv) chain.	140472	O35206,	0.99	1	TTDMAVTGFASPLSTGK	4	IPI00648224;IPI00830821;IPI00830830;
IPI00409078	Ttc18	tetratricopeptide repeat domain 18 isoform 1.	128276	.	0.93	1	LFAFEAEVNEK	3	IPI00474335;IPI00755831;
IPI00409148	Hp	haptoglobin.	38752	Q61646,	1	1253	AEGDGVYTLNDEK+AEGDGVYTLNDEKQWVNTVAGEK+ATDLKDWVQETMAK+DITPTLTLYVGK+DWVQETMAK+GSFPWQAK+HGLTTGATLISDQWLLTTAK+IIGGSMDAK+LPECEAVCGKPK+LRAEGDGVYTLNDEK+LRAEGDGVYTLNDEKQWVNTVAGEK+NLTSPVGVQPILNEHTFCAGLTK+NQLVEIEK+QWVNTVAGEK+QWVNTVAGEKLPECEAVCGKPK+SCAVAEYGVYVR+VGYVSGWGR+VMPICLPSK+VMPICLPSKDYIAPGR+YQEDTCYGDAGSAFAIHDMEEDTWYAAGILSFDK+YVMLPVADQDK	2	IPI00889954;
IPI00410750	Zfp451	zfp451 protein.	62731	.	0.83	8	AASYMAYMTQYQR+CIISDGMDAGLWQLCTTR+EDLPGTMSSASQSGQDAILYLQTQVAEMSR+IATTEVFKDPADCHPSSFMGHR+LVPPLHPLLRIATTEVFKDPADCHPSSFMGHR+RVTFQSEAETCEGKPDWMTSKK	1	.
IPI00410795	Nhedc1	isoform 1 of sodium/hydrogen exchanger-like domain-containing protein1.	61958	Q8C0X2-1,	0.98	9	AVMTVAFLAILITAPNGALLIGILGPK+DDGFQSSVTVEMSK+ILEFIKIPVVPPLPPLIGMLLAGFTIR+RAFLVLSMCISAVLGCQHIGLHGSGGLVTLVLSFMAAK	1	.
IPI00410909	Megf8	multiple egf-like-domains 8.	303499	.	0.99	19	DCHACTQDPFCEWHQSTNRK+EVFWAGNCSEAACGAADCEQCTR+EVFWAGNCSEAACGAADCEQCTREGKCMWTR+GPESCSLGCAQATQCALCLR+LHEYCGGSGGAGGSGHGGGGGR+LLPSPEACNQSGACTWCHGACLSGDQAHR+LLSDCQACLAFSSPTAPPR+LYISGGFGGVALGR+MASRPFAK+QEKPPQNMELPAVAGHTLTARR+RFGGLLPPGGGAAR+SLGVSPIHNDFISR+TLQPGDGEASIPR+VTVCFPPDPAGPAPAWKPAGLPPPAFRR+YSHVAAVLGGSVLLVAGGYSGRPR	2	IPI00849952;
IPI00410954	Evpl	envoplakin.	232318	Q9D952,	0.97	24	AYTEVAAAEQQQLR+ELDEDIQAIHSAR+ELLQQQACVLGLHR+MVELGHPAIGPIQVHQEALK+QGSGSPAHAR+QLSALADQQGRILQQDWSDLMPDPAGVRR+SLDEEVGRR	2	IPI00890238;
IPI00411109	Caskin1	isoform 1 of caskin-1.	150495	Q6P9K8-1,	0.98	4	AAASVVSGPPVASDCASPGDSARQK+DELLVPAAAGPYATVQR+EAIGPDGEVVNR+IQGSPTPASK+KGPPPPPPK+KLESASASASEGK+KVPLPGPGSPEVK+RAHGTPPPVSPKPPPPPTAPKPAK+SQEYLLDEGMAPGTPPK+SSSAMASANLADEPAPDVEAEDGR	2	IPI00553792;
IPI00411157	Lphn3	isoform 3 of latrophilin-3.	175672	Q80TS3-3,	0.87	6	AYVQAMVETVNNLLQPQALNAWR+ELSCESYPIELR+ENTDNIQLEVAR+IVISQLNPYTLR+LSTEGNLEDLK	17	IPI00411158;IPI00619988;IPI00816961;IPI00816972;IPI00816975;IPI00880421;IPI00880426;IPI00880762;IPI00880921;IPI00881222;IPI00881441;IPI00881714;IPI00881939;IPI00882082;IPI00882084;IPI00882244;
IPI00415685	Pdlim5	isoform 3 of pdz and lim domain protein 5.	26376	Q8CI51-3,	1	2	DFNMPLTISSLK+LIEDTEDWRPR+MSNYSVSLVGPAPWGFR+SEPVSVQKPTVTSVCSESAQELAEGQR	1	.
IPI00416397	Rabep1	isoform 5 of rab gtpase-binding effector protein 1.	94914	O35551-5,	1	44	AMTPEQEETASLLSSVTQGMESAYVSPSGYR+CLGNHHGPSVGGGTNVAGGLGSPLSLPQIFA+ELHEVCHLLEQER+QANDQLEK+QVEELKK	1	.
IPI00420136	Snx3	sorting nexin 3.	18762	.	1	3	GDDGIFDDNFIEER+KQGLEQFINK	4	IPI00555150;IPI00857621;IPI00857793;
IPI00420440	Acyp1	acylphosphatase-1.	11241	P56376,	1	11	FMQQWLETR+GTVQGQLQGPVSK+LGLVGWVQNTDR+VIANLDYSDFQIVK+VQGVFFR	2	IPI00881291;
IPI00420448	Cd300lg	isoform 5 of cmrf35-like molecule 9.	31985	Q1ERP8-5,	0.82	2	CGDIVYANQDQEVTR	5	IPI00606839;IPI00648072;IPI00649931;IPI00867893;
IPI00420571	Kif26a	kinesin-like protein kif26a.	196313	Q52KG5,	1	15	DCAPAAGPER+DSSPQSLGIVPCAISWLFR+ENEAKPSQDAEK+GASLCAVQPAVAECGPAR+GATTLGVTTPAASCGDAPAEAVVHSGSLK+HASSSSGGESSCEEGR+KGKHASSSSGGESSCEEGR+KQVTLYDPAAGPPGCAGLR+LECIDGSEAFPGPQGGSDGAQASPAR+QVTLYDPAAGPPGCAGLR+RDHLCEELAETQGR+RGATTLGVTTPAASCGDAPAEAVVHSGSLK+RLPAGLDQDPCSSRPAPEGAGASAEQSHSAGGGGWCR+SAESTSFLK+SAPGLSGDPDYSSSSEQSCDTVIYVGPGGMALSDR+SASDPSKTGTQSEQR+TPPVGMSGQAALPPLLSDSAYLSPSAR	1	.
IPI00420589	Igsf3	immunoglobulin superfamily member 3.	134710	Q6ZQA6,	0.83	7	IQGNSALLHITDLQAR+LHAESPSSGVYR+TVTGEFIDK	1	.
IPI00420601	Usp10	ubiquitin carboxyl-terminal hydrolase 10.	87056	P52479,	0.94	3	QADFVQTPITGIFGGHIR	2	IPI00858314;
IPI00420706	Lrpprc	leucine-rich ppr motif-containing protein, mitochondrial.	156615	Q6PB66,	0.82	60	ALLERCGAIAEQSSLLSVFCLR+ITELLYK+MVAGLDTIGLSK+QNVVFSSETYSTLIGLLLSK+QVPSQIAVTR+SIPDAMNLILFLATEK+VYSCSMK	2	IPI00875457;
IPI00420745	Psma2	proteasome subunit alpha type.	27510	.	1	6	GYSFSLTTFSPSGK+KLAQQYYLVYQEPIPTAQLVQR+LAQQYYLVYQEPIPTAQLVQR+YNEDLELEDAIHTAILTLK	2	IPI00890001;
IPI00420807	Sfrs1	isoform 1 of splicing factor, arginine/serine-rich 1.	27745	Q6PDM2-1,	1	2	EAGDVCYADVYR	3	IPI00457656;IPI00515505;
IPI00420810	Gcnt2	glucosaminyl (n-acetyl) transferase 2 isoform b.	46342	.	0.94	8	NLTPGVLPPAHAVGR+NPYVHNTAR+WMDMEAK	1	.
IPI00420924	Dcx	16 days embryo head cdna, riken full-length enriched library,clone:c130058c09 product:doublecortin, full insert sequence.	42486	O88809,	0.91	11	MNGLPSPTHSAHCSFYR+QSPISTPTSPGSLRK+QVTCLHDFFGDDDVFIACGPEK	3	IPI00556879;IPI00830647;
IPI00420970	Krt74	type ii keratin kb37.	54747	.	0.99	6	EELARMLCEYQELMGLKLSLDVEIATYR+FASFIDK+FASFIDKVR+FLEQQNQVLQTK+KDADAAYTVKVELQDK+LSLDVEIATYR+QCSNLEMAIADAEQR	1	.
IPI00421162	Zc3h11a	zinc finger ccch domain-containing protein 11a.	86492	Q6NZF1,	1	18	AVEMHSAVIAAVKPLSSSSVLQESPTKK+DSSVLSSAQAASEPLLPEGSGPSSSQTATKPRR+KLSVGGDSDPPLK+LSVGGDSDPPLKR+VAGKPVLTAVSGVTR+VESPETNIDK	1	.
IPI00421223	Tpm4	tropomyosin alpha-4 chain.	28468	Q6IRU2,	1	76	AEGDAAALNR+AQEQLATALQNLEEAEK+CGDLEEELK+EENVGLHQTLDQTLNELNCI+HITDEADR+IQALQQQADDAEDR+IQLLEEELDR+KIQALQQQADDAEDR+KLVILEGELK+LVILEGELK+MEILEMQLK+RIQLLEEELDR+TIDDLEEK+YSEKEDKYEEEIK	1	.
IPI00421241	Acacb	acetyl-coenzyme a carboxylase beta.	275750	.	0.99	36	EASFEYLQNEGER+EEAISNMVVALK+EIMAPWAQTVVTGR+ELPDGTCVVEFQFMLPSSHPNR+GGSWVVLDSTINPLCIEMYADK+GYIAYELNSLQHR+KLVGQLGK+LLYGESPWGVTPIPFETPLSPPIAR+MTDSKPLTNSK+NQLVTMLIDELCGPDPTLSDELTSILCELTQLSR+QTTSDSAIPIR+RFQAQSLGTTYVYDFPEMFR+RWFVETEGAVK+TVTISMVTCR+YLNVEHHFQQAHYDK+YVIVDVIGK	1	.
IPI00453613	Huwe1	isoform 2 of e3 ubiquitin-protein ligase huwe1.	369729	Q7TMY8-2,	0.91	9	DSAVAISGADSR+ENGFGLAECCR+EVIYDMLNALAAYHAPEEADK+EVLGSLPNVFSALCLNARGLQSFVQCQPFER+GLSWQPPPYTPTPR+HADHSSLTLGSGSSTTR+HTMEKVVRSAATSGAGSTTSGVVSGSLGSR+KPLKVYGGRMAESMLAILCHILR+KYPYHLMLQK+LLGPSAAADILQLSSSLPLQSR+MAESMLAILCHILR+QIKPLLSASSR+RPVMLTLLR+RSSDPLGDTASNLGSAVDELMR+SAATSGAGSTTSGVVSGSLGSR+SCASSSHENRPLDLLHK+SHHAASTTTAPTPAAR+VCDLIMTAIKR	4	IPI00453615;IPI00463909;IPI00655012;
IPI00453807	Cdk5rap2	cdk5 regulatory subunit-associated protein 2.	205945	Q8K389,	0.97	23	DELGHSFPANSFSK+ENLEDLLGPSSIATYLDSK+EVTTDSTK+KVSDLIQLVK+KVTQELNDLK+QNEALSMMLEK+VSVNGTDQSENINIPDDTEDLK	1	.
IPI00453850	Pcdha3	protocadherin alpha 3.	102248	.	0.97	4	CSTAPTEGGPGKPMLVCSSAVGTWSYSQQRR+RVGERLLSSYVSVHAESGK+TLVDSAGR+TVGAGHVVTKVR	1	.
IPI00453851	Dido1	isoform 1 of death-inducer obliterator 1.	247176	Q8C9B9-1,	0.92	19	AAVGVSMAHFSVSDALMSPPPK+EFQDTPYNEMTGAPAQCEGPDQAQFMGNR+ETPAGTAVVQGPGLAAEAK+GQAPGFMPGPR+ICTGQVPSSEDEPAPK+KDPHGEK+QAGPTPMTAASK+REEDSAETGSVQIGSAEQDRPLCK	1	.
IPI00453854	Rnf10	activated spleen cdna, riken full-length enriched library,clone:f830027i15 product:ring finger protein 10, full insert sequence.	106425	.	0.88	3	ASLSPAASAPPGPAR+EKGVLVALPK+LDTPATSDPLSEDR+MLFGDSSPFPEQLGLGPEASVGR+QYAVGDTITMQLMKR+RPPPALNAMSLGPR+SPPPLGPTTPPCR	1	.
IPI00454049	Echs1	enoyl-coa hydratase, mitochondrial.	31474	Q8BH95,	1	18	AFAAGADIK+AQFGQPEILLGTIPGAGGTQR+ESVNAAFEMTLTEGNK+LFYSTFATDDR+LVEEAIQCAEK+NSSVGLIQLNRPK+SLAMEMVLTGDR	1	.
IPI00454053	2010300C02Rik	2010300c02rik protein.	125910	.	0.95	13	DLSPSEGDVAPPK+DMSPPEGDVAPPK+DMSPSKDNMAPPK+EAAEGLGEDGAGK+EAAEGLGEDGAGKK+EPGPAVQDK+GQPPAATGPGADGQPTPPWITMAR+RASYASTDQPSWMELARK+RIIAPPER+SPPEMSLLHDVGPGTTIK	2	IPI00662408;
IPI00454207	Rai1	isoform 1 of retinoic acid-induced protein 1.	201529	Q61818-1,	1	11	AASSPSNPAALPVASDSSPMGSK+ADAHEASACMGFQEDHAIGKPAAALSGDFK+AKPESVSTCSVTSPDDMSTK+ASSTQGGGEDNSSGGGK+DYYSPQPYTGYEGGTGTPSGTVATAAADK+KSAFMAPVPAK+LSRPDGPADPAK+QPGQAGLSCDR+QPGQASYSSYSK+QQQVLPLDPAEPEIR+RQQQVLPLDPAEPEIR+SLTALSEPQTPGPPGLTTTPTPPDK+TLKGLECSASTTAAAPTTATITTPTALGR+VQSWFESSLSHMKPGEEGPEMER	3	IPI00454208;IPI00890011;
IPI00457623	Pcnt	pericentrin.	331338	P48725,	1	21	CEALLAQEK+DPLDGFPR+EDCALQLLMAQNR+EMLTQELENLK+ENQEGTTLICMLR+ETALTELR+ETLTNEAK+HNAEISALEKR+MEMSAQHIENGK+QLQQAARELLTLK	1	.
IPI00457898	Pgam1	phosphoglycerate mutase 1.	28832	Q9DBJ1,	0.94	5	ALPFWNEEIVPQIK+YADLTEDQLPSCESLK	1	.
IPI00458039	Mdn1	midasin homolog.	630342	.	0.99	10	ALAIGEQLPVFGECGWQEDINR+ALEFGEPVLLVGDTGCGK+AQQLQDISSLLWTNMAVPSVAEFR+CTFAATRPSSVLLEQLAVCVSQGEPVLLVGETGTGK+CVQMNWMVILVGPASVGK+DFADILMEPTLEEKKK+EEHGSGAADANQAEGHESNLIAR+ELQTVSEHIHSCLGSPADSFAGVK+EQLLMNALLYLR+ETIAGVMPDLLSSDLSYPSPVPTSQLPSACR+FYSTSLSAGVSNVLK+GEDNAIEMSEDFDGK+KEHATCGQTGVDNVQSAQAVELAGAAPEK+LNALLEPGGVLTINER+QGGGRKGLPK+QLETWQAHDYGNAEEEK+RLVEEYALYPDTVAPLLASILQLQHGMR+TSLVEHLAAVTGR	1	.
IPI00458093	4930473A06Rik	hypothetical protein loc320226.	152309	.	0.95	14	CLQALAWLTSSDLLGTVISSMTELQEVISK+EYFSQNK+FESACEELNNALLR+MSLNTSSNATPGDTQR+QPEGMLDK+TSNELDSTK+VEQLEAEHMDCSDLLRR	1	.
IPI00458295	.	pregnancy-associated mouse protein pamp1.	6304	.	1	82	LMLDSGSEPK	1	.
IPI00458366	ENSMUSG00000055755	adult male hypothalamus cdna, riken full-length enriched library,clone:a230010g09 product:hypothetical protein, full insert sequence(fragment).	16957	.	0.98	6	GGLGTGAGMPGAGSQHR+GGLGTGAGMPGAGSQHRTPRGLGPR+SLGDPRPGPQGHGPWRPAGSGR	1	.
IPI00458460	Zfp106	isoform 1 of zinc finger protein 106.	208974	O88466-1,	0.88	16	ATGDGSSPELPSLER+CVGVFEGHTSK+ELVQLIQERK+ESGLKPTLRQILNASRR+QHLLTDHTNPNFQTLK+RHSAQLPSGHIMPVMHSAR+TLQNPLPTTPK+VMVTACLDK	2	IPI00458461;
IPI00459253	.	putative uncharacterized protein (fragment).	56940	.	0.87	1	KCVELFFEIAENK+KPEEITKEEYAAFYK+KTMEINPENPIMEELR+LDESEDEKK	1	.
IPI00459279	Qdpr	dihydropteridine reductase.	25570	Q8BVI4,	1	25	AALDGTPGMIGYGMAK+GAVHQLCQSLAGK+MTDSFTEQADQVTADVGK+NSGMPPGAAAIAVLPVTLDTPMNR+RPNSGSLIQVVTTDGK+VDAILCVAGGWAGGNAK	2	IPI00881473;
IPI00459593	.	v303-d-j-c mu protein (fragment).	15684	.	0.96	2	QVQLQQPGAELVKPGASVK	13	IPI00459594;IPI00459596;IPI00459598;IPI00459698;IPI00553322;IPI00845622;IPI00845666;IPI00845687;IPI00845691;IPI00845714;IPI00845736;IPI00845801;
IPI00459866	.	hypothetical protein.	53585	.	0.87	3	DSFLFDAELQDSTVAQLYVPSK+ETYIEIR	1	.
IPI00460861	Morc4	isoform 2 of morc family cw-type zinc finger protein 4.	100625	Q8BMD7-2,	0.89	18	GAPAGPGTPGGGLAR+KKPCLTFTDDGCGMTPHK+KMIVTEDSLPSLEAILNYSIFNCEK+YLQSNSSSHTRPFSAIAELLDNAVDPDVSAR	3	IPI00625800;IPI00831571;
IPI00461195	ENSMUSG00000059459	adult male diencephalon cdna, riken full-length enriched library,clone:9330168g06 product:hypothetical protein, full insert sequence(fragment).	11297	.	0.89	17	GAGSAPAGVR+HGSAGGSGQAQDCPANWSPLPR+SAAPLAGWSGTAPAPAAPGSAPCCACLAAATVCR	1	.
IPI00461249	.	similar to heat shock protein 1.	61055	.	1	12	DIGNIISDAMKK+DPGMGAMGGMGGGMGGSML+EEKDPGMGAMGGMGGGMGGSML+IPAMTIAKNAGVEGSLIVEK+TLNDELEIIEGMK+VGGTSDVEVNEK+VGLQVVAVK	1	.
IPI00461456	Rpl23a	60s ribosomal protein l23a.	17695	P62751,	1	6	KLYDIDVAK+LAPDYDALDVANK+LYDIDVAK	8	IPI00752639;IPI00752985;IPI00754976;IPI00848364;IPI00849847;IPI00874935;IPI00876212;
IPI00461823	Saps2	saps domain family member 2.	100460	Q8R3Q2,	0.98	10	AILTTIGVLEEPLGNAR+APLVASDSSSSGGSDSEDDEK+EEQAEASGSDGK+ILEAWEANDHTQAAGGMRR+LETTPSITSPPENTMVTHLFQK+LMAALLHTNTPGINQELCR+LNTMDLLLDLFFK+NALEHGGQDRKTGSAVAR+QQCMEELVNLITQDPPQDMEEK	1	.
IPI00461937	Rarres2	retinoic acid receptor responder protein 2.	18350	Q9DD06,	1	13	AEEVLFSAGTFVR+HPPVQLAFQEIGVDR+LQQTNCPK+QGPQDPQELQCIK+SLQVALEEFHK	1	.
IPI00461939	Ikbke	ikbke protein.	78017	.	0.81	2	CVVAGMNHLR+DPALDVPK+ITTEKPAGAISGTQK+RPPEVQGGSR	1	.
IPI00461964	Aldh6a1	methylmalonate-semialdehyde dehydrogenase [acylating], mitochondrial.	57916	Q9EQ20,	0.9	1	VNAGDQPGADLGPLITPQAK	1	.
IPI00462013	Setbp1	set-binding protein.	168129	Q9Z180,	0.92	10	CIDLPSK+DDLQFLAELEELITKFQVFR+EAYSADSAQEASPAR+GSYESSMSPGMPSPHLK+HGVHLQGTVGMGLGDIQPSLNPPK+KKPTAVDSVAIPSAPVLSLLAASAATSDAASSSLK+KPTAVDSVAIPSAPVLSLLAASAATSDAASSSLK+LLTAGDPTASDLK+MIENETPSVGLETGGNAEK+SEGSISAMMARK+VPALEPVASFAK+WDSDMGGSKR	1	.
IPI00462072	Eno1	alpha-enolase.	47141	P17182,	1	89	AAVPSGASTGIYEALELR+AGAVEKGVPLYR+AGYTDQVVIGMDVAASEFYR+DATNVGDEGGFAPNILENK+FTASAGIQVVGDDLTVTNPK+GNPTVEVDLYTAK+HIADLAGNPEVILPVPAFNVINGGSHAGNK+IEEELGSK+IGAEVYHNLK+LAMQEFMILPVGASSFR+LAQSNGWGVMVSHR+LMIEMDGTENK+SFVQNYPVVSIEDPFDQDDWGAWQK+SGETEDTFIADLVVGLCTGQIK+TIAPALVSK+VNQIGSVTESIQACK+VNQIGSVTESLQACK+YDLDFK+YITPDQLADLYK	1	.
IPI00462464	Fbxw12	f-box and wd-40 domain protein 12.	53974	.	0.83	5	VVYMNSLLR	1	.
IPI00462565	EG245190	similar to hcg1820409.	41085	.	0.92	7	GSPGMLDALDAALAPLAELR+VNALAGLGPDELSALER	2	IPI00672306;
IPI00462934	Khsrp	far upstream element-binding protein 2.	76809	Q3U0V1,	1	33	AINQQTGAFVEISR+AWEEYYK+DAFADAVQR+ERDQGGFGDR+GGGGPGGGGPGGGGASGGPSQPPGGGGPGIR+GGGGPGGGGPGGGGASGGPSQPPGGGGPGIRK+GGPPGQFHDNANGGQNGTVQEIMIPAGK+GQGNWGPPGGEMTFSIPTHK+IFNDLLQSLRSGPPGPPGAPGMPPGGRGR+IGGDAATTVNNNTPDFGFGGQK+IGQQPQQPGAPPQQDYTK+KQAQVATGGGPGAPPGSQPDYSAAWAEYYR+LASQGDSIGSQLGPIHPPPR+MILIQDGSQNTNVDKPLR+MMLDDIVSR+MSDYNTGGPPPGPPPPAGGGGGAAGAGGGPPPGPPGAGDR+QAQVATGGGPGAPPGSQPDYSAAWAEYYR+SVSLTGAPESVQK+VG…	1	.
IPI00463074	Shroom2	shroom family member 2.	165264	A2ALU4-1,	1	17	APSPPPLGLPLR+DCGNDKPPLFDAQVGKPTR+EIGNVGYQSEGHLDCR+QDPGMPGVVSLATNSTYYSTSAPK+QSLACPAELPPLPSGLER+SLADILDPSVK+SNSSIDHLGGHSK+SQHQASSSSHDLSGSWEHTSLQR+VMDNNTTVK+WLCSDDR	1	.
IPI00463154	.	predicted.	16613	.	0.98	8	RYFDHFGDFSFCAATEDNHK+VVAAVADAMAYK+YFDHFGDFSFCAATEDNHK	1	.
IPI00463390	.	11 kda protein.	10776	.	0.93	2	EVQLQQSGPELVKPGASVK	3	IPI00623379;IPI00626084;
IPI00463677	Grid2ip	isoform 1 of delphilin.	132021	Q0QWG9-1,	0.81	8	APSPQPGLGSIHADSPPSPDPIRPPSRR+AYNTSILLAHLK+ILEFVLAMGNYLNDGQPK+KATSLLGGR+MMSAVYAELESR+RPDEPPPR+SRASPPVPSLVGTSGPR	4	IPI00674912;IPI00876145;IPI00880454;
IPI00464136	Zcchc2	isoform 2 of zinc finger cchc domain-containing protein 2.	123322	Q69ZB8-2,	0.98	7	DGPGPEGSGCAK+DSDSNSEDSVNPSSAR+DYHYLR+EFSSESFDK+FLGSCLEDLARK+GLEPPVASGPTAGAGMPGGGGHAAALR+GPPPPPSPPRGLEPPVASGPTAGAGMPGGGGHAAALREQER+LIVYLALLGSENR+NGNVSCYNCGVSGHYAQDCK+TLGMLVPNAVAISAVMESSNSAPVGILGPAASGESEK	2	IPI00848811;
IPI00465761	Arhgef17	isoform 1 of rho guanine nucleotide exchange factor 17.	221671	Q80U35-1,	1	11	DDDLWSSRSSVGWGVYR+GELTGPGFEGPGGEPIR+LDEDLATLGQMSK+LPSLDHR+LSSGGGGSSETVGR+QALSDLMIKPVQR+RSSMSLYTAASVIDTASK+SARPLSGPGIEGR+SFSCSEKPMAR+SPSFGTGDGLLLRPQTR+SVACMVDSSLGVWVTLK	1	.
IPI00465786	Tln1	talin-1.	269833	P26039,	1	13	AAAFEDQENETVVVK+ALGDLISATK+DVDNALR+EADESLNFEEQILEAAK+ELLENPVQPINDMSYFGCLDSVMENSK+EVIQEWSLTNIKR+GTEWVDPEDPTVIAENELLGAAAAIEAAAK+GTQACITAASAVSGIIADLDTTIMFATAGTLNR+LITSMRDK+LLAALLEDEGGNGRPLLQAAK+QAAASATQTIAAAQHAASAPK+QARILAQATSDLVNAIK+QQLTGHSKRVAGSVTELIQAAEAMK+RLLSDLLPPSTGTFQEAQSR+VEHGSVALPAIMR+VSHVLAALQAGNR+VSQMAQYFEPLTLAAVGAASK+WSVLAGHSR	1	.
IPI00466069	Eef2	elongation factor 2.	95314	P58252,	1	13	ARPFPDGLAEDIDKGEVSAR+CELLYEGPPDDEAAMGIK+GPLMMYISK+KVEDMMK+SDPMVQCIIEESGEHIIAGAGELHLEICLK+TGTITTFEHAHNMR+TILMMGR+VTDGALVVVDCVSGVCVQTETVLR	1	.
IPI00466128	Akr1a4	alcohol dehydrogenase [nadp+].	36587	Q9JII6,	1	16	DAGHPLYPFNDPY+GLEVTAYSPLGSSDR+ILQNIQVFDFTFSPEEMK+MPLIGLGTWK+VICIPKSINPSR	1	.
IPI00466733	Minpp1	multiple inositol polyphosphate phosphatase 1.	54563	Q9Z2L6,	0.87	2	LAALFPDLFSR	3	IPI00652093;IPI00652444;
IPI00466919	Pgd	6-phosphogluconate dehydrogenase, decarboxylating.	53247	Q9DCD0,	1	6	AGQAVDDFIEK+GILFVGSGVSGGEEGAR+LVPLLDTGDIIIDGGNSEYR+VDDFLANEAK	2	IPI00894579;
IPI00467066	Gnmt	glycine n-methyltransferase.	32675	Q9QXF8,	1	12	AWLLGLLR+NYDYILSTGCAPPGK+SLGVAAEGLPDQYADGEAAR+VWQLYIGDTR	1	.
IPI00467068	Masp2	isoform 1 of mannan-binding lectin serine protease 2.	75517	Q91WP0-1,	1	68	CEYDFVK+LVSPGFPEK+SGYLSSPEYPQPYPK+SWTLTAPPGYR+TDFTGTVAGWGLTQK+VSANMLCAGLETGGK+VTFHSDYSNEKPFTGFEAFYAAEDVDECR+WPEPVFGR+YADHQDR+YVCEADGFWTSSK	2	IPI00876556;
IPI00467235	Hmcn1	hemicentin 1.	611760	.	1	9	ADAGLYTCVASNVAGVAK+ASDNIHIEAGGK+CNMQACPGGPQR+DGQPLAPDAHLTVSTQGMVLQLIK+DHGSQSLSIVNVR+EFNLTVNVPPSIGGGPQSLVTLLNK+EIGEAVNGFTLTNAVFK+EIGEAVNGFTLTNAVFKRETQVEFATGEVLR+GSLVLADSAGR+ILSSGAIEIPTTQLNHAGR+ISDGGDYTCIAINQAGESKK+LCDNPPPANGGRPCQGADSEAR+LCNNPPPSFGGAHCSGAETQMQVCNER+LWEIGNMLDTGR+MCFNMR+QSVTLTCEVR+QVTLECKSDAVPPPVIMWLK+SLAILPSGSLQISR+SLPPPIITWAK+TCPEGSEANHETCVDIDECQNR+VHLLSTDHLEHAVNTWK+VLILPGGR+VYIPPI…	1	.
IPI00467327	Afap1	actin filament-associated protein 1.	80615	Q80YS6,	0.84	5	ALAGGVTLGLAIEPR+ESLKKALAGGVTLGLAIEPR+KAVLTNILLR+KSQPSSGSSPCRGHVLQK+KVETAGGVK	1	.
IPI00467495	Gmfb	glia maturation factor, beta.	16824	Q9CQI3,	0.81	2	LVVLDEELEGVSPDELKDELPER	2	IPI00857233;
IPI00467600	Stab2	stabilin-2.	277532	Q8R4U0,	1	5	ALQALPQEQQDFLFNEDNK+ASCKCAAGFQGNGTVCTAINACEISNGGCSAK+CAAGFQGNGTVCTAINACEISNGGCSAK+EACAKEAASIATYNQLSYAQK+HLTDLSISGTLFVPQNSGLPKNK+LLFDGGVAYGIDCLLMDPTEGGR+TECQSCSVNIAVK+VITSATTLQGEPISISVSQDTVLINK+YGIHCDQACSCVHGR+YHLCSAGWLESGRVAYPTIYASK	1	.
IPI00467833	Tpi1	triosephosphate isomerase.	26713	P17751,	1	122	DLGATWVVLGHSER+ELASQPDVDGFLVGGASLKPEFVDIINAK+FFVGGNWK+HVFGESDELIGQK+IAVAAQNCYK+IIYGGSVTGATCK+RHVFGESDELIGQK+SNVNDGVAQSTR+TATPQQAQEVHEK+VSHALAEGLGVIACIGEK+VTNGAFTGEISPGMIK+VVLAYEPVWAIGTGK	1	.
IPI00467841	Calm3	12 days pregnant adult female placenta cdna, riken full-lengthenriched library, clone:i530005b05 product:calmodulin 1, full insertsequence.	21560	.	1	32	DGDGTITTK+DGNGYISAAELR+EADIDGDGQVNYEEFVQMMTAK+EAFSLFDK+EAFSLFDKDGDGTITTK+LTDEEVDEMIR+MKDTDSEEEIR+VFDKDGNGYISAAELR	2	IPI00761696;
IPI00467908	Notch2	notch gene homolog 2.	265633	O35516-1,	1	8	CICPLGYTGK+CNIDIDECASNPCR+CPEGFLGEYCQHR+CPPQWTGQFCTEDVDECLLQPNACQNGGTCTNR+CSCPPGTR+EGSYEAAK+GLLCEENIDECAGGPHCLNGGQCVDR+GVHCELEVNECQSNPCVNNGQCVDK+QCQWTDACLSHPCENGSTCTSVASQFSCK+QCVQDSDQCFK+SLPEEQEQEQEVIGSK	2	IPI00621767;
IPI00468021	Zbtb40	zinc finger and btb domain containing 40.	138167	.	0.84	5	EVMQTLVK+HCLMTFTQASALAYHTKK+HMVTHVGGKPFSCGICNK+LHTGDRPFMCK+LYQESTPAEK+VSCESEWTDEPRPVCIPADR+VSQIQPEGSAGEGK	1	.
IPI00468037	F830116E18Rik	activated spleen cdna, riken full-length enriched library,clone:f830116e18 product:similar to hemoglobin theta-1 chain.	15779	.	0.93	22	HYPGDFSPEMHASLDK+MGSNVGIYATEALER+TYFPHLDLRPGSSQVK+VADALTLATQHLDDLPASLSALSDLHAHK	1	.
IPI00468203	Anxa2	annexin a2.	38676	P07356,	1	6	AEDGSVIDYELIDQDAR+GVDEVTIVNILTNR+SLYYYIQQDTK+TNQELQEINR+TPAQYDASELK	1	.
IPI00468231	Sp9	sp9.	48959	.	0.81	7	AAAAAAAAAAAAAAAASAGGK+FGTTPLAMLAATCNK+THTGEKR	1	.
IPI00468665	Myh13	myosin, heavy polypeptide 13, skeletal muscle.	223561	.	0.99	11	ACFAVDDKEMYVKGMIQSR+ANTACATLDK+DNQSILITGESGAGK+IHFGATGK+KAITDAAMMAEELK+KGSSFQTVSAVFR+KLEGDLK+LLSFLFSNYAGAEAGDSAGGK+MEGDLNEMEIQLSHANR+MFLWMVTR+MRNAYEEVVDQLETLRR+MSSDAEMAIFGEAAPYLR+QREEQAEPDGTEVADK	1	.
IPI00468850	Fahd1	fumarylacetoacetate hydrolase domain-containing protein 1.	25158	Q8R0F8,	1	5	ENDEIEAGIDGVVSMR+GEAIPEAAAMDYVAGYALCLDMTAR+IITLEEGDLILTGTPK+SFTSSCPVSAFVPK	2	IPI00653743;
IPI00468902	Snx12	sorting nexin 12 isoform 2.	19808	.	1	4	FTTYEVR+GDEGIFEESFIEER+LNSKPQDLTDAYGPPSNFLEIDIFNPQTVGVGR+MSDTAVADTRR+YSDFEWLK	4	IPI00762269;IPI00877268;IPI00877355;
IPI00469095	Dchs1	dachsous 1.	346384	.	0.98	3	APGSGTTTSGGGGR+ATDPDLGANGQVTYGGVSGESFSLDPNTGVLTTLR+DSGANGHISYHLASPAEGFR+EHCASYAFSVTAVDGAAAGPLSTTVPITITVR+GIFSIQPSTGAITVR+GLFHVDPATGTITTTAILDR+VAVSEDLPPGSTLLTLEATDADGSR+VTATDSGSPPLR+YSLLEAVPGPEGR	1	.
IPI00469211	Qsox1	isoform 3 of sulfhydryl oxidase 1.	63336	Q8BND5-3,	1	231	ADYLALVFER+AHFSPANIVIDSSASR+DCADHFEQMAAASMHQVR+EFNIAGFPTVR+EVTLDLSQYHAVAVR+FFQAFTK+FGVTDFPSCYLLLR+FSVLEGQR+GSPEATPELLL+IPYSFFK+IYMADLESALHYILR+KEDAVLTEK+LIDALESHR+LNDIDGFFTR+LSGALSEDPHFPK+NGSGATLPGAGANVQTLR+NGSGATLPGAGANVQTLRMR+RVLNTESDLVNK+SFYTSYLR+SPSNAILWLWTSHNR+SYVQFFFGCR+VLNTESDLVNK+VPVLVESR+YSEAHPQEPADGQEVLQAMR	1	.
IPI00469218	Lamp1	adult male lung cdna, riken full-length enriched library,clone:1200007i01 product:lysosomal membrane glycoprotein 1, fullinsert sequence.	43936	.	0.8	5	EIYTMDSTTDIK+MLSLNVFSVQVQAFK+YNVTGNNGTCLLASMALQLNITYLKK	2	IPI00876139;
IPI00469248	1200009O22Rik	leucine-rich repeat-containing protein kiaa0644.	88810	Q9DBY4,	0.95	6	FMDSTGGGTSGSLRR+GSFEGLESLVK+YLDYLDDQLLQNGSCVDPSPSPTAGSR	1	.
IPI00469387	Fetub	gugu alpha.	44372	.	1	3307	AMFHINKPR+AMNQWVSGPAYYVEYLIK+DGYMLSLNR+EHYQEDMGSLFYLTLDVLETDCHVLSR+ENNPLVLPP+GGSPEEAFPVQLDLTTNPQGDTLDVSFLYLEPGDK+GGSPEEAFPVQLDLTTNPQGDTLDVSFLYLEPGDKK+GSIQHLPELDDEKPEESK+HVPLIQPVEK+KLVVLPFPGK+KTHTTCPDCPSPIDLSNPSALEAATESLAK+LVVLPFPGK+LVVLPFPGKEQR+MFYESVYGQCK+NTAPTSSPSVTAPR+RVLYLPAYNCTLRPVSK+SAECPGPEK+SAECPGPEKENNPLVLPP+SQASCSLQHSDSEPVGICQGSTVQSSLR+SVTVTCEFFESQAQVPGDENPAVTQGPQK+THTTCPDCPSPIDLSNPSALE…	2	IPI00889976;
IPI00469541	Bmp1	bone morphogenetic protein 1.	111666	.	1	8	AAAFLGDIALDEEDLR+AFQVQQAAVLR+DNGGCQQDCVNTFGSYECQCR+ECTWAISSTPGHR+MPGVARPPLPLLSLPLLLLLLLLPR+RGGGPQAISIGK	1	.
IPI00469893	Habp2	isoform 2 of hyaluronan-binding protein 2.	57860	Q8K0D2-2,	1	162	CKDNPCVHGDCLITQK+DEIPHNDIALLK+DNPCVHGDCLITQK+FCEIGPDDCYVGDGYSYR+FTCACPDQYK+GDTFSCSCPAPFSGSR+LIANPLCNSR+LKPVGGHCALESR+NPDGDHKPWCFVK+TVCLPSDPFPSGTECHISGWGVTETGEGSR+VLPACRPNPCQNGGVCSR+VVLGDQDLK+YPYTGPDCSK	2	IPI00648593;
IPI00470181	Loxl1	12 days embryo female mullerian duct includes surrounding region cdna,riken full-length enriched library, clone:6820427h12 product:lysyloxidase-like, full insert sequence.	47669	.	1	2	EALCAPAPTPAPAPAEALSPXLPTDLTVVTR+EVAVGDSTGMAR+GLPDLVPDPNYVQASTYVQR+LGWYPPYAANVPPEAYVPPR+LSVGSVYRPNQNGR+QAPSLPLPGR+QPSSYPQQFPYPQAPFVNQYENYDPASR+TYEQGYVYYR+VLEPPYLPVR+VLLAGAPQTSQR+VPGPGLLPSPR	1	.
IPI00470983	Tmem151b	transmembrane protein 151b.	61706	Q68FE7,	0.86	4	CFSFASVEAENAYLCQR+MSPPGSAAGESAGGGGGGGGSGVPEEPMASADEGPAR+SALSICASPRAAQGPGASAGCGGSR	1	.
IPI00471022	Plxnd1	plexin d1.	211608	.	0.99	7	AIEPLSGPLDGGTLLTIR+CSLASLLTIALHGK+ELLVDLIDASAAK+FHMVQNVSMAVHHIGR+FLDSPNPMTVVVYNCAMGSPDCSQCLGR+IPEGASLAMSLTDKK+KGFAELQTDMTDLTK+QIQDMTPLSEQEMNAHLAEESR+RAAGGAPPSAR+VAACEVHSTCGDCVGAADAYCGWCTLETR+VLNSTLITCPSPGALSNASAPVDFFINGR+YRPQIMAALEANPTAR	1	.
IPI00471042	Nin	ninein isoform 1.	243718	Q61043-1,	1	20	DLLDQHLEER+EALILILSR+EMTGKLAALESAHRASLER+EQVEPIMK+HLSMQSFDESGR+IATMKQEQTAWEEQSESLK+KQDLLFDISVLK+KVGQMGSLER+LQTVVQNTQADLTHSR+NGIHQAALASFK+QEQTAWEEQSESLK+QLDDTRVASEQEQAAMK	2	IPI00474690;
IPI00471077	Txndc17	thioredoxin domain-containing protein 17.	14015	Q9CQM5,	1	10	DPNNDFR+SWCPDCVEAEPVIR+TIFAYFSGSK	1	.
IPI00471080	1300017J02Rik	riken cdna 1300017j02 gene.	76796	.	1	1362	ADRDQYELLCMDNTR+CDQWSAVSGGALACATEETPEDCIAATMK+CLQDGTADVSFVK+CVNAPLEGYYVVAVVK+CVNAPLEGYYVVAVVKK+DLLFSDDTECLSNLQNK+DQYELLCMDNTR+EDSIQELLR+EPYFGSWGALK+ETAAATFFSSSCVPCADGK+FDAFFSR+GEADAMSLDGGFAYVAGHCGLVPVLAENYLSTHSSGR+GLKHEDFELLCLDGTR+GTGFQLNQLR+HEDFELLCLDGTR+HLTVFEAMPTK+HPTVLQNTDGK+HPTVLQNTDGKNPEPWAK+ILFNQQELFGR+KGTGFQLNQLR+KPVTEAQSCHLAR+KSDVGITWK+KVLPAGGPAVTCVR+KVLPAGGPAVTCVRK+MFPSLCQLCAGK+MSHPECIR…	1	.
IPI00471091	0610012D14Rik	putative l-aspartate dehydrogenase.	30270	Q9DCQ2,	1	10	HPDLVVEVAHPK+IIHESGAQILR+LDAAGGLQSLR+MATSTLPQVPYK+TVLYEGPVR+VGVVGYGR	1	.
IPI00471179	Plxdc2	plexin domain-containing protein 2.	59616	Q9DC11,	1	7	ADLAAAGVMLLCHFLTDR+ASMGQASPESK+HRQDWVDSGCPEEVQSK+IALHLKDSGASTDDSAAEK+IQQIPNVR+MLTATQYIAPLMANFDPSVSR+QDWVDSGCPEEVQSK+VGLSDAFVVVHR+WPAMKFR	1	.
IPI00471183	Col2a1	isoform 2 of collagen alpha-1(ii) chain.	139110	P28481-1,	1	30	CQGQDAQEAGSCLQNGQRYKDK+GAQGPPGATGFPGAAGR+GEPGDDGPSGLDGPPGPQGLAGQR+GEPGGAGPIGPPGER+GEPGNPGSPGPAGASGNPGTDGIPGAK+GETGPAGPQGAPGPAGEEGK+GETGPAGPQGAPGPAGEEGKR+GPEGAQGSR+GPPGPAGAPGPQGFQGNPGEPGEPGVSGPMGPR+GQPGVMGFPGPK+LLSTEGSQNITYHCKNSIAYLDEAAGNLK+QGDQGIPGEAGAPGLVGPRGER	5	IPI00622890;IPI00623625;IPI00828467;IPI00828653;
IPI00471341	Ubl4	ubiquitin-like protein 4a.	17801	P21126,	1	9	ECSLQVAEDELVSTLK+FLHPEVTEAMEK+HFSVADASR+LTLDDIER+LVDSPATPIWQLISK+RLSDYNIGPNSKLNLVVKPLEK+SLSRLTLDDIER	1	.
IPI00471441	Ptms	ptms protein.	23158	Q9D0J8,	0.91	1	GRPCKIVEMSTSKTGK+LPASPGPGTMSEK+MADDLDFETGDAGASATFPMQCSALRK+SVEAAAELSAK+VHLVGIDIFTGK	1	.
IPI00471475	Serbp1	isoform 1 of plasminogen activator inhibitor 1 rna-binding protein.	44714	Q9CY58-1,	1	6	FDQLFDDESDPFEVLK+KEAGGGGVGGPGAK+KNPLPPSVGVADK+NPLPPSVGVADK	5	IPI00471476;IPI00471477;IPI00471478;IPI00884509;
IPI00473320	Actb	bone marrow macrophage cdna, riken full-length enriched library,clone:i830072c08 product:actin, beta, cytoplasmic, full insertsequence.	41800	.	1	84	CPEALFQPSFLGMESCGIHETTFNSIMK+DLTDYLMK+DSYVGDEAQSK+EITALAPSTMK+GYSFTTTAER+HQGVMVGMGQK+IWHHTFYNELR+QEYDESGPSIVHR+SYELPDGQVITIGNER+TTGIVMDSGDGVTHTVPIYEGYALPHAILR+VAPEEHPVLLTEAPLNPK+WSSTTAPACAKPASR	1	.
IPI00473475	Gchfr	gtp cyclohydrolase 1 feedback regulatory protein.	9584	P99025,	0.84	1	SVLGNNFYEYYVNDPPR	1	.
IPI00475138	.	similar to pr22 isoform 1.	17275	.	0.86	18	ASGQAFELILSPR+DLSLEEIQK+ENREAQMAAKLER+ESVPDFPLSPPK+KDLSLEEIQK+RASGQAFELILSPR	3	IPI00551236;IPI00649157;
IPI00475157	Serpina1b	serpina1b protein.	45155	.	1	100	AVLTIDETGTEAAAATVFEAVPMSMPPILR+DQSPASHEIATNLGDFAISLYR+ELDQDTVFALANYILFK+EPFDPENTEEAEFHVDK+FDHPFLFIIFEEHTQSPIFVGK+FDHPFLFIIFEEHTQSPLFVGK+IFNNGADLSGITEENAPLK+IFNNGADLSGITEENAPLKLSK+IFNNGADLSGITEENAPLKLSKAVHK+IVEAVKELDQDTVFALANYILFK+KVINDFVEK+LSISGDYNLK+LVQIHIPR+MQHLEQTLSK+RLVQIHIPR+TLMSPLGITR+VINDFVEK+VINDFVEKGTQGK+WKEPFDPENTEEAEFHVDK	1	.
IPI00475209	Masp1	13 days embryo male testis cdna, riken full-length enriched library,clone:6030458d19 product:mannan-binding lectin serine protease 1, fullinsert sequence.	82446	.	1	31	DNEVMDTFQIECLK+DQVLVSCDTGYK+EDEELSCDHYCHNYIGGYYCSCR+EHVTVYLGLHDVR+HGLVTFSTR+IEPSQAVYSFK+IVDCGAPAGLK+LPVVSHAECK+NAELGLFPWQALIVVEDTSR+SPEPISTQTHSVQILFR+TGTITSPDYPNPYPK+TLSDVLQYVK+VECSGNLFTQR+VETEDQVLATFCGR+VSNYVDWLWEEMNSPR+YSCQQPYYK	1	.
IPI00515360	Hspg2	perlecan.	469785	.	1	14	AEMLQALASLEAVLLQTVYNTK+APLPWQHR+DIIYIGGAPDVATLTR+DQELEDNVHISPNGSIITIVGTRPSNHGAYR+FSSGITGCIK+GGSLPPHAQVHGSR+GSIQVDGEDLVTGR+LLQVTPTDSGEYVCR+LNWGHIPAHPR+RFSDTCFLDTDGQATCDACAPGYTGRR+SLPEVPETIEFEVR+SPGPNVAVNTK+TSTADGLLLWQGVVR+VPSGLYLGTCER	1	.
IPI00553260	E2f8	transcription factor e2f8.	93276	Q58FA4,	0.8	42	AESSQNSPPVPNK+IYDIVNVLESLHMVSR+RMITAEDSGPSSVK	1	.
IPI00553333	Hbb-b1	hemoglobin subunit beta-1.	15840	P02088,	1	864	AAVSCLWGK+AAVSCLWGKVNSDEVGGEALGR+DFTPAAQAAFQK+DFTPAAQAAFQKVVAGVATALAHKYH+GTFASLSELHCDK+GTFASLSELHCDKLHVDPENFR+KVITAFNDGLNHLDSLK+LHVDPENFR+LLGNMIVIVLGHHLGK+LLGNMIVIVLGHHLGKDFTPAAQAAFQK+LLVVYPWTQR+LLVVYPWTQRYFDSFGDLSSASAIMGNAK+MVHLTDAEK+VITAFNDGLNHLDSLK+VNSDEVGGEALGR+VVAGVATALAHK+VVAGVATALAHKYH+YFDSFGDLSSASAIMGNAK	1	.
IPI00553419	Dsp	desmoplakin.	332912	.	1	42	AFIGFEGVK+AITGFDDPFSGK+ALLQAILQTEDMLK+ATGSEMSQR+AVTGYNDPETGNIISLFQAMNK+DANSENCNK+DEETGLCLLPLK+DLIDFDDR+DLKDEIVR+GAGAIAGASASPK+GFFDPNTEENLTYLQLK+GYFNEELSEILSDPSDDTK+IEVLEEELR+ITNLTQQLEQASIVK+KMSAAEAVK+KVSYMQLR+LEYDDLR+LGIYEAMK+LLEAQIATGGIIDPK+LNDSILQATEQR+LTYEIEDEKR+LVFDGLR+NHYNEEMSNLR+NKYETEINITK+QLQNIIQATSR+QLVQEQENVK+QMGQPCDAYQKR+QQIQNDLNQWK+RLLQLQEQMR+RSMSFQGIR+SAIYQLEEEYENLLK+SMSFQGIR+SVQNDSQ…	2	IPI00849835;
IPI00553703	Frem2	isoform 1 of fras1-related extracellular matrix protein 2.	350640	Q6NVD0-1,	0.98	5	LPVTCNPR+MPMNAALGEPSK+NLDFAPGVNMQTVR+QIFPIVIIPTNDEQPEMFMR+QQDITEGK+REHFQVLVR+VLMATDLDSDDK+VVAMIYR+WLISAPAGPDGVTSPMR	1	.
IPI00553777	Hnrnpa1	crl-1722 l5178y-r cdna, riken full-length enriched library,clone:i730007e13 product:heterogeneous nuclear ribonucleoprotein a1,full insert sequence.	38804	P49312-2,	1	4	EDTEEHHLR+IEVIEIMTDR+LFIGGLSFETTDESLR+QEMASASSSQRGR	2	IPI00817004;
IPI00553784	Pcnp	pest proteolytic signal-containing nuclear protein.	18963	Q6P8I4,	0.91	1	SAEDEAADLPTKPTK	3	IPI00856839;IPI00875023;
IPI00553798	Ahnak	ahnak nucleoprotein isoform 1.	604253	.	1	52	ADVDASLPEVEGGVK+AEGPEVDVNLPK+AESPEMEVNLPK+AKGLEVDVK+ELLLPNWQGSGSHGLTIAQR+FSMPGFK+GDVDVSIPNIEGDLK+GEGLDVNVTLPEGDISISGPKVNVEAPNVNMEGLGGK+GGVTGSPEASISGSK+GPKVKGEYDVTMPK+GPQITGPSLEGDLGLK+LEGPHLSLK+LPSGSGPASPTTGSAVDIR+MPFLSISSPK+MPSMNIQTHK+MPSMNIQTHKISMPDVGLNLKGPK+SSEVVLSGDDEDYQR+VDIDVPDVNIEGPDAK+VDIEAPDVSIEGPEGK+VDIETPNLEGTLTGPKISSPSGKIGACR+VEAPDVEVHGPDWHLK	1	.
IPI00554931	Hpd	4-hydroxyphenylpyruvate dioxygenase.	45054	P49429,	0.95	2	HNHQGFGAGNFNSLFK+MPINEPAPGR	1	.
IPI00554989	Ppia	peptidyl-prolyl cis-trans isomerase.	18314	P17742,	1	101	EGMNIVEAMER+FEDENFILK+HTGPGILSMANAGPNTNGSQFFICTAK+IIPGFMCQGGDFTR+ITISDCGQL+KITISDCGQL+TEWLDGK+VKEGMNIVEAMER	1	.
IPI00555023	Gstp1	glutathione s-transferase p 1.	23609	P19157,	1	27	AFLSSPEHVNRPINGNGK+EAAQMDMVNDGVEDLR+FEDGDLTLYQSNAILR+MLLADQGQSWK+YVTLIYTNYENGK	1	.
IPI00555069	Pgk1	phosphoglycerate kinase 1.	44550	P09411,	1	34	AHSSMVGVNLPQK+DCVGPEVENACANPAAGTVILLENLR+GCITIIGGGDTATCCAK+IQLINNMLDK+ITLPVDFVTADK+LGDVYVNDAFGTAHR+QIVWNGPVGVFEWEAFAR+SLMDEVVK+SVVLMSHLGRPDGVPMPDK+VDFNVPMK+VLNNMEIGTSLYDEEGAK+VLPGVDALSNV+VNEMIIGGGMAFTFLK+VSHVSTGGGASLELLEGK+YSLEPVAAELK	1	.
IPI00555085	Isg15	ubiquitin cross-reactive protein.	17898	Q64339,	1	3	ELLGEYGLKPQCTVIK+GHSNIYEVFLTQTVDTLK+MLGGNDFLVSVTNSMTVSELK	2	IPI00850667;
IPI00555131	Hbb-y	hemoglobin subunit epsilon-y2.	16137	P02104,	1	49	LHVDPENFK+LLVVYPWTQR+LSELHCDK+VNVEEVGGEALGR	1	.
IPI00556721	Igfals	insulin-like growth factor-binding protein complex acid labile chain.	66960	P70389,	1	32	DFALQNPGVVPR+LAHNAITSLRPR+LETPAEGLFSSLGR+LWLDANPWDCSCPLK+SLAAGLFR+SLPEHVFQGLGR+TFEGLGQLEVLTLNDNQIHEVK+VAGLLEDTFPGLLGLHVLR	1	.
IPI00556847	Igk	igk protein.	26302	.	0.99	5	DSTYSMSSTLTLTK+FSGSGSGTDFTLK+QNGVLNSWTDQDSK	4	IPI00808554;IPI00850020;IPI00853676;
IPI00556850	Acp1	acid phosphatase 1, soluble isoform 1.	17922	.	1	44	AKIELLGSYDPQK+EDFATFDYILCMDESNLR+IELLGSYDPQK+KLVTDEK+QLIIEDPYYGNDSDFEVVYQQCLR+SPIAEAVFR+VSDNWAIDSSAVSDWNVGRPPDPR	2	IPI00828470;
IPI00556878	Fstl1	putative uncharacterized protein.	34554	.	1	21	CALEDETYADGAETEVDCNR+CLNPSFNPPEK+ICANVFCGAGR+IQVDYDGHCK+KCALEDETYADGAETEVDCNR+KSASPSASPVVCYQANR+LIQWLEAEIIPDGWFSK+LSFQEFLK+SFDNGDSHLDSSEFLK+TGYVQELQK	2	IPI00876527;
IPI00605812	Odz1	odd oz/ten-m homolog 1.	304859	.	1	5	APSSLAVSPDGTLYVADLGNVR+CECSPGWEGDHCTIAHYLDAVR+FAAVPSVFGK+FQITIHHPIYLK+GPECDVPEEQCIDPTCFGHGTCIMGVCICVPGYK+LFAPVALASGPDGSVYVGDFNFVR+MILGIQCELQK+WFPAAINLVYTFAWNK+YYLAMDPMSESLYLSDTNTRK	2	IPI00720016;
IPI00606016	Znrf3	isoform 1 of zinc/ring finger protein 3.	98967	Q5SSZ7-1,	0.84	3	GPNSSTSEVGLEVSPGAALDLRR+QVAHSAGR+SVCSGYLADCPGSDSSSNSSGQCR+TSMDSHGNPVTLLTMDR	3	IPI00660315;IPI00828435;
IPI00606056	Zfhx2	zfh-5.	273485	.	1	33	ARKNACEGGPVTAGGASGGASGCR+CLVCQAFSTDSLELLLYHCSIGR+HDDGSLSPTGSEAGGGGEGEPPK+HLANLQGFQAGPGGQASPPEASLPPTSVGDK+HLANLQGFQAGPGGQASPPEASLPPTSVGDKEPKTK+HPESNSHCSYCSAGGAHPR+KGQFRSTPGGVAGPAVKPTVPPSPAPFPK+KMLDCISEEVGLK+KNACEGGPVTAGGASGGASGCR+KNACEGGPVTAGGASGGASGCRR+MLDCISEEVGLKK+NACEGGPVTAGGASGGASGCR+NACEGGPVTAGGASGGASGCRR+QAVPPPPTPPPPESLGGGDK+QAVPPPPTPPPPESLGGGDKLACGACGK+SLPEAEWK+TDCPYCDVK+TQMSSLQLK+VHTLSQHA…	2	IPI00755051;
IPI00606873	Ercc6	excision repair cross-complementing rodent repair deficiency,complementation group 6.	165958	.	0.98	10	AHKYSYLKMDGTTTIASR+DIVYCHGVLITSYSYIR+DSSLPVQHPSSLTEK+EDGASVSGAPSSSSLLAR+EDGASVSGAPSSSSLLARMRAR+EYQSVLDDLMSCTTSLR+KPPVSDTPANAATLIGEKPK+KSVGVHSVVR+LEDDSEESDAEFDEGFK+MSLSLPDK+NHMILPER+QGSSYAGAR+QQCLGAASGVPTWTGHR	1	.
IPI00608020	Ftl1	ferritin light chain 1.	20772	.	1	94	ALFQDVQKPSQDEWGK+DDVALEGVGHFFR+LLEFQNDR+LVNLHLR+NLNQALLDLHALGSAR+QNYSTEVEAAVNR+TQEAMEAALAMEK+VAGPQPAQTGAPQGSLGEYLFER	2	IPI00762203;
IPI00620432	Notch3	neurogenic locus notch homolog protein 3.	244248	Q61982,	0.97	5	CACPPGLSGPSCR+CETDVNECLSGPCR+CQCPLGYTGLLCENPVVPCAPSPCR+CQLEDPCHSGPCAGR+CSQSLAPDACESQPCQAGGTCTSDGIGFR+ECNTPGCGWDGGDCSLNVDDPWR+EGSYEAAK+ELQCPVGIPCQQTAR+EPVGQDALGMK+GESLMGEVVTDLNDSECPEAKR+LCDIQSLPCTEAAAQMGVRLEQLCQEGGK+RLMALPPPPPPMR	1	.
IPI00620682	Ncor1	isoform 2 of nuclear receptor corepressor 1.	266519	Q60974-2,	0.84	13	DLESTSEK+ESIPAKSPVPGVDPIVSHSPFDPHHRSSAAGEVYR+IMPLPSGGPSISQGLPASR+KDPAFGVKHEAPSSPLSGQPCGDDQNASPSK+KGLVEHGR+QDILTQESR+RSVQCVCTSSALPSGK+SEHEISEIIDGLSEQENNEK+SPVPGVDPIVSHSPFDPHHR+SSEDSSENAASR+TAHEMSLKRSYEAVEGSIK+TQETILQQRPSVFQGTNGTSVITPLDPTAQLR+TVLSGSIMQGTPR+VEDHGVVMSHPVGIMPGSASTSVVTSSEARR	1	.
IPI00621219	Ankrd13b	isoform 2 of ankyrin repeat domain-containing protein 13b.	77069	Q5F259-2,	1	7	DEDDDLLR+DLELVQLVLR+ELLLAAAQPSEEQVLSR+LQCPALGPAQVPAPAAMCSGATTSSCGWLWSCPLR+LQCPALGPAQVPAPAAMCSGATTSSCGWLWSCPLRSR+RGGGECAR+RGGGECARR+RVVYMETLALAGQDR+SSPPPGAPHPRR+VLLAHGADVGR	1	.
IPI00621831	Gp6	platelet glycoprotein vi.	34561	P0C191,	0.82	3	CQSPYSFDEFVLYK	2	IPI00675539;
IPI00621903	Ptpn3	tyrosine-protein phosphatase non-receptor type 3.	103896	A2ALK8,	0.93	6	DLHNLDLMIGIASAGIAVYR+ESLSENNPAQSCLTQK+FLDGLVQTFK+KVIGGMVWNPVMRR+SDDGDGYLVLIR	1	.
IPI00622235	Vcp	transitional endoplasmic reticulum atpase.	89322	Q01853,	1	14	EDEEESLNEVGYDDIGGCR+ETVVEVPQVTWEDIGGLEDVK+GILLYGPPGTGK+GPELLTMWFGESEANVR+IVSQLLTLMDGLK+KYEMFAQTLQQSR+LDQLIYIPLPDEK+LGDVISIQPCPDVKYGK+LIVDEAINEDNSVVSLSQPK+NAPAIIFIDELDAIAPK+QAAPCVLFFDELDSIAK+VINQILTEMDGMSTK+WALSQSNPSALR	1	.
IPI00622240	Krt2	keratin, type ii cytoskeletal 2 epidermal.	70923	Q3TTY5,	0.94	17	DYQELMNTK+FASFIDK+FASFIDKVR+FGGGSGFGGGGFGGGSFGGGR+GFSSGSAVVSGGSR+GGGGGGGSTYGSGGR+GGSGGGGFGSQSLVGLGGYK+GGSGGGGVSSGGGSR+GGSGGGGVSSGGGSRGGSSSGGGSR+GGSGGGYGSGGGSGSGGGYSSGGGSR+GGSSSGGGGYSSGGGSR+GSGSGSGGGGYSSGGGSR+KDVDSCYMDK+KYEDEINKR+LSLDVEIATYR+SISSSVAGNSGGYGGSSFGGSSGFGGGR+SNTSFSCISRHGGGRGGSGGGGFGSQSLVGLGGYK+YEDEINK+YEDEINKR	2	IPI00875096;
IPI00622912	Ryr1	ryanodine receptor 1, skeletal muscle.	565039	.	0.88	12	AILGLPNSVEEMCPDIPVLER+CAPETHLIQAGK+CLSHLDFVPCPVDTIQIVLPPHLER+DMVVMLLSLLEGNVVNGMIAR+EEDEEEEAHEK+EGTPGGTAQAGVEAQPAR+ELLLQTNLINYVTSIRPNIFVGR+ERAILGLPNSVEEMCPDIPVLER+ISWSGSHLR+LHPCLVNFHSLPEPER+LQMCHLLEYFCDQELQHR+NGADEEECPLPEEIR+QELEAKGGGSHPLLVPYDTLTAK+QFIFDVVNEGGESEK+QSLFQEEGMLSLVLNCIDR+QVFNSLTEYIQGPCTGNQQSLAHSR+VVSYLAGCGLQSCPMLLAK	1	.
IPI00623030	5430411K18Rik	upf0493 protein kiaa1632.	290801	Q80TA9,	1	11	EHPTRKQDEAALGCSK+ESQQVALDGELLETMPK+HYPWLESDTAVASSIVQLFSDCVGSLHTSFK+KAQVQLK+LKPSSELHLAPK+LLPGDEGALR+LQPTPGVQK+LTDLEIASLSQDPTASSK+QSLMAEERLSSGILGAIGLGRR+TAFHLMQEDCVQK+VPAEGSEGTPEGQAGTPGFLTSPELHR+WSPYMADVK+YLAQKPYTGLISESMK	1	.
IPI00623069	Mll3	myeloid/lymphoid or mixed-lineage leukemia 3.	540258	Q8BRH4-1,	0.98	19	CCFCHEEGDGLTDGPAR+CNQENAGPVVSAIQGSTPLPAR+CVEWSLGICQMEEPLLVNVDK+DLPQRKSSVSSEIK+DMLHCNMCKR+EGELMDCDGK+GYHTFCLQPVMK+HGNFLPRPDFPGPR+KSMFNEELDLNVPIDDK+LDNQCASVEPK+LYESQNRGVYMFR+MPSLPGWQSNSASAHLPLNPPR+MVGTPRPPPGGHSFPR+NPLMELPLAVNPTGCAR+QQNNLSNPPTPPASLPPTPPPMACQK+SAEQQQPPPAPPEEPGAPAPSPAAADK+VPGLPGPLIRPPDTCSQTPRPPGPGR+YLCSIEEK+YVELPAEEESTFSSATDLNK	1	.
IPI00623114	Fat1	fat tumor suppressor homolog 1.	507183	.	0.92	19	CQSDIDECAGNPCR+ENLEINK+ETGIITLSNLRR+ETISGYTLTVQAADNGNPPR+EVEVLATITLNNLNDNTPLFER+FSIEPKTGVVSSK+GVNVITVNATDADSK+TGVVSSKK+YVTAIDRDSGR	2	IPI00666346;
IPI00624663	Pzp	alpha-2-macroglobulin.	167282	Q61838,	1	9181	AAPLSLCALTAVDQSVLLLKPEAK+AESPVFVQTDKPIYKPGQIVK+AFAQAQSHIFIEK+AINYLISGYQR+ALLAYAFALAGNK+ALSFYQPR+AMGVPMMGLDYSDEINQVVEVR+APFALQVNTLPLNFDK+APSAEVEMTAYVLLAYLTSESSRPTR+ATVLNYMSHCIQIR+DAVKEEDSLHWQRPGDVQK+DHENCISGEDITHNGIVYTPK+DLSSSDLSTASK+DLTFYYLIK+DSFYCSPFTISGSPLPYTFITVEIK+EEDSLHWQRPGDVQK+EEGTGIELTGIGSCEIANALSK+ENGCFQQSGYLLNNAMK+EQTYNTLLCPQDTELQDNWSLELPPNVVEGSAR+EVLVTIESSGTFSK+FCQEFQHYPAMGGVAPQALAVAAS…	1	.
IPI00624876	Vasp	vasodilator-stimulated phosphoprotein.	39667	P70460,	1	5	LPAQSEPVR+MKEEIIEVFVQELR+QVWGLNFGSK+SSSSVTTSEAHPSTPCSSDDSDLER+STGGGLMEEMNAMLAR	1	.
IPI00624932	Scn5a	putative uncharacterized protein.	227707	.	0.93	7	ALSAVSVLTSALEELEESHR+ALSAVSVLTSALEELEESHRK+EGLPEEEAPRPQLDLQASKK+EHEALTIR+GVDTVSRSSLEMSPLAPVTNHER+IAKPNQISLINMDLPMVSGDR+KPAALATHSQLPSCIAAPR+TIVGALIQSVK+VLGESGEMDALK	2	IPI00894690;
IPI00625970	Spp1	putative uncharacterized protein.	32588	.	1	72	GDSLAYGLR+ISHELESSSSEVN+KLYSLHPDPIATWLVPDPSQK+LYSLHPDPIATWLVPDPSQK+QNLLAPQNAVSSEEK+QNLLAPQNAVSSEEKDDFK+VTDSGSSEEKK	1	.
IPI00626106	Tagln2	transgelin 2.	22395	.	1	80	DDGLFSGDPNWFPK+GASQAGMTGYGMPR+GPSYGLSR+IQASSMAFK+LINSLYPEGQAPVK+LINSLYPEGQAPVKK+NFSDNQLQEGK+NMACVQR+NVIGLQMGTNR+QMEQISQFLQAAER+TLMNLGGLAVAR+YGINTTDIFQTVDLWEGK	1	.
IPI00626350	Col5a3	collagen type v alpha 3 chain.	171969	.	0.97	12	EKPGGWYSTFR+GAQGPPGSAGPR+GDPGPAGPPGPPGSPAEVHGLRR+GDSGPSGAAGPPGKK+GDVGQNGSPGPPGEK+GFPGPQGAPGDPGPIGLK+GKKFSYVDADGSPVNVVQLTFLK+GLPGLQGPPGFPGPK+GLPGPAGLPGIPGIDGAR+GLPGPAGLPGIPGIDGARGLPGTVIMMPFHFASSSMK+GNPGPPGPRGEDGPEGQKGPGGLPGDEGPPGAAGEK+GPAGHSGLPGADGAQGRR+GPPGPSGSEGPPGLPGGVGQPGAVGEK+GPPGPVGLTGRPGPVGLPGYPGLK+GPVGPSGGIGLPGQSGGQGPIGPAGEK	1	.
IPI00626353	Col4a4	isoform 1 of collagen alpha-4(iv) chain.	164096	Q9QZR9-1,	1	10	GASGLLEMGPPGPMGMPGQK+GEPGSHGPPGFPGFK+GFPGPPGAPGMR+GHPGCPGAGGPPGIPGSPGLK+GLCTCPPGPMGPPGPPGPPGR+GMPGMIGPPGPPGR+IPGLPGVPGPRGPEGAMGEPGR+KGEPGDAGPPGDGGFSGER+KGPVGPPGCR	1	.
IPI00626662	Aldh1a1	retinal dehydrogenase 1.	54468	P24549,	1	60	ANNTTYGLAAGLFTK+EAGFPPGVVNIVPGYGPTAGAAISSHMDVDK+EEIFGPVQQIMK+ELGEHGLYEYTELK+ELGEHGLYEYTELKTVAMK+FPVLNPATEEVICHVEEGDK+GFFVQPTVFSNVTDEMR+IFVEESVYDEFVK+IHGQTIPSDGDIFTYTR+IHGQTIPSDGDIFTYTRR+ILDLIESGK+ILDLIESGKK+KFPVLNPATEEVICHVEEGDK+LADLMER+LLLATMEALNGGK+RANNTTYGLAAGLFTK+VAFTGSTQVGK+VFANAYLSDLGGCIK+YVLGNPLTPGINQGPQIDK	1	.
IPI00626790	Glul	glutamine synthetase.	42120	P15105,	0.97	5	LTGFHETSNINDFSAGVANR	1	.
IPI00648042	Zcchc11	zinc finger, cchc domain containing 11.	185126	.	1	143	CFICGDAGHVR+IAIEDPFSVK+KELSQCICIGTPDGAESAGTDCR+LCLFGSSKNGFGFR+MDDFQLKGIVEEKFVK+NDKSEIGTSSLNR+QGDLTPSETSLK+QQTQTDNIADSDDSASGIEDTADDLSK+RCDIGDASR+VIMTFLPECSLR	1	.
IPI00648459	Arid1a	at rich interactive domain 1a.	242092	.	0.93	11	AEQQQREEAGGEAAAAAAERGEMK+APGSDPFMSSGQGPNGGMGDPYSR+ELQDGAESNGGGGGGGAGSGGGPGAEPDLK+FGAMGGGGPSAAGGGTPQPTATPTLNQLLTSPSSAR+GGTPGSGAAAAAGSKPPPSSSASASSSSSSFAQQR+GPADMASQCWGAAAAAAAAAAAVSGGAQQR+KHLTTVEGTPGTTEQEGPPPDGLPEK+MAAQVAPAAASSLGNPPPPPSELKK+MAHASMGNRPYGPNMANMPPQVGSGMCPPPGGMNR+MAHASMGNRPYGPNMANMPPQVGSGMCPPPGGMNRK+QNTGSATQGPAYHGVNR	1	.
IPI00648658	Clta	clathrin, light polypeptide (lca) isoform d.	23479	.	0.99	3	AAEEAFVNDIDESSPGTEWER+ELEEWYAR	2	IPI00828932;
IPI00649141	Vps13d	vacuolar protein sorting 13d.	487329	.	0.97	6	AITCAELVLDVSPK+EAALPTADTSQNIELGVSLENFPLCK+EQPNLCTMR+FLKELTLSMDELEENFRSMLK+GGVLSADDK+GMGVFFCK+GPQVQGLFMMPPAGVGLGSLK+GSLQDSVMNLTQSIVMLEQHTR+IATASIGGTK+QTGGSLLTEPCR+TVGMADGER+VNCMQLGVESSGR	2	IPI00664030;
IPI00649406	Park7	parkinson disease (autosomal recessive, early onset) 7.	18474	.	1	22	DVMICPDTSLEDAK+GAEEMETVIPVDVMR+GLIAAICAGPTALLAHEVGFGCK+KGLIAAICAGPTALLAHEVGFGCK+TQGPYDVVVLPGGNLGAQNLSESPMVK+VTVAGLAGK+VTVAGLAGKDPVQCSR	4	IPI00649794;IPI00894769;IPI00895518;
IPI00649643	Usp34	isoform 2 of ubiquitin carboxyl-terminal hydrolase 34.	376554	Q6ZQ93-2,	1	10	EQESWTVWQLDCLACLLK+FLLAHNYPR+IDDYEEEPLLKPGCK+KGEFPGGLMGPVR+KLENPAGICLGESQGTSER+KTTISCYLRCLDGR+LLYALEIIEALGKPNRR+LRPVHAHLYLQPGMEDGSDDMDASVEDIGGR+LTEVFLVLVQGTSLIQR+MFTYLMESECK+MTIEMYPSDQVADLR+QLNPALIPTLQELLNK+QSSFASLLNTNMPIGNK+TTISCYLR	2	IPI00668474;
IPI00649653	OTTMUSG00000012492	similar to major urinary protein 1.	26837	.	1	89	DEECSELSMVADK+DEECSELSMVADKTEK+DGETFQLMGLYGR+DGETFQLMGLYGREPDLSSDIK+EPDLSSDIK+EPDLSSDIKER+FAQLCEEHGILR+IEEHGNFR+INGEWHTIILASDK+INGEWHTIILASDKR+LFLEQIHVLENSLVLK+MLLLLCLGLTLVCVHAEEASSTGR+TDYDNFLMAHLINEK+YSVTYDGFNTFTIPK	1	.
IPI00649880	Aldoa	putative uncharacterized protein.	39285	.	1	50	AAQEEYIK+ADDGRPFPQVIK+ALANSLACQGK+ALQASALK+CPLLKPWALTFSYGR+ELSDIAHR+ELSDIAHRIVAPGKGILAADESIGSMGNR+FSNEEIAMATVTALR+GVVPLAGTNGETTTQGLDGLSER+HTPSPLAIMENANVLAR+KDGADFAK+KELSDIAHR+LQSIGTENTEENR+LQSIGTENTEENRR+VDKGVVPLAGTNGETTTQGLDGLSER+VNPCIGGVILFHETLYEK	2	IPI00856272;
IPI00650075	Apoh	4 kda protein.	3501	.	0.86	8	ICPKPDDLPFAT	1	.
IPI00651831	Man1a	b16 f10y cells cdna, riken full-length enriched library,clone:g370137l20 product:mannosidase 1, alpha, full insert sequence.	41753	.	0.84	6	EEGAPGDPGAGLEDNLAR+HREEGAPGDPGAGLEDNLAR+MPVGGLLPLFSSPGGGGLGSGLGGGLGGGR+MPVGGLLPLFSSPGGGGLGSGLGGGLGGGRK+QPLWTFCFNEKIKLQK	1	.
IPI00651982	Gli3	adult inner ear cdna, riken full-length enriched library,clone:f930048n11 product:gli-kruppel family member gli3, full insertsequence.	58238	.	0.83	4	EFDTQDQLVHVSGCCVGTDAASQISDLCR+SPYADILPSAATAGAGAIHMEYLHAMDSTR	1	.
IPI00652195	Mepe	adult inner ear cdna, riken full-length enriched library,clone:f930104e24 product:osteoregulin homolog.	46941	.	0.91	44	LVGSSNEITGSTNFR+QGNRIDAGSQNAHQGK+TPSDFEGSGSPDLLVR	1	.
IPI00652566	9030205A07Rik	hypothetical protein loc217843.	275376	.	0.8	4	DIIEYLSTSFLPMAILGSSGR+ECGAEELVCAVEAVISLLK+KNLPAGGAMIR+LKPQFVTK+NLPAGGAMIR+QLGLSSSHHSLDNTDFDNK+QMIASVPGCGTAAMECIR+RVSVASDPGRR+VGGYWDK+VMVEMVCLHVISLMEALQECNSTIFVK	2	IPI00668872;
IPI00652571	Fn1	fn1 protein.	42287	.	0.82	1	CHEGGQSYK+CNDQDTR+DSMIWDCTCIGAGR+GEWTCKPIAEK+GFNCESKPEPEETCFDK+GFNCESKPEPEETCFDKYTGNTYK+GNLLQCVCTGNGR+HALQSASAGSGSFTDVR+HYQINQQWER+IGDTWSK+ISCTIANR+QAQQIVQPQSPVAVSQSKPGCFDNGK+QMLCTCLGNGVSCQETGR+RPHETGGYMLECLCLGNGK+TAIYQPQTHPQPAPYGHCVTDSGVVYSVGMQWLK+TYLGNALVCTCYGGSR+VGDTYERPK+YTGNTYK	1	.
IPI00652600	Hectd1	similar to hect domain containing 1.	289449	.	1	26	DLAEQCVKVLELICTRESGAVFEAGGLNCVLTFIR+DMQLIALEQLCMLLLMSDNVDR+EVELPLTNFR+FILDGKLATMYSSGSPEGGSDSSESR+GESLMEWAENVMQIHADRK+GSSSSVCSVASSSDISLASTK+HSFTAETSLGSEFVTGWTGK+KASLALIR+KGSSSSVCSVASSSDISLASTK+LATMYSSGSPEGGSDSSESR+MAAAGGTVSGPSSACKPGR+TNATNNMNLSR	2	IPI00762434;
IPI00652813	Fn1	cdna, riken full-length enriched library, clone:m5c1012h16product:fibronectin 1, full insert sequence.	260128	.	1	693	APITGYIIR+ATGVFTTLQPLR+CDPHEATCYDDGK+CDPIDQCQDSETR+CHEGGQSYK+CNDQDTR+CTCVGNGR+DAPIVNRVVTPLSPPTNLHLEANPDTGVLTVSWER+DDKESAPISDTVVPAVPPPTDLR+DLEVIASTPTSLLISWEPPAVSVR+DSMIWDCTCIGAGR+DTLTSRPAQGVITTLENVSPPR+DTLTSRPAQGVITTLENVSPPRR+EATIPGHLNSYTIK+EESPPLIGQQATVSDIPR+EINLSPDSSSVIVSGLMVATK+ESAPISDTVVPAVPPPTDLR+ESNPLTAQQTTK+EVTSDSGSIVVSGLTPGVEYTYTIQVLR+EYLGAICSCTCFGGQR+FGFCPMAAHEEICTTNEGVMYR+FLTTTPNSLLVSWQA…	1	.
IPI00653195	Krtdap	isoform 1 of keratinocyte differentiation-associated protein.	11497	Q3V2T4-1,	1	29	LQSAFQSENFLNWHVITDMFK+NAFPFINWDFFPK	2	IPI00885706;
IPI00653542	Gm1614	hypothetical protein.	112660	.	1	29	AASSGVDAGALR+DSSLPALLPR+GAGAQPVLSVSAQNSR+KLGSAVPAPSNVTFK+MGASPLKAHSLGFSAAK+QDSSGSSGSYHTAPGSPEPPDVGPDTEGR+RAENSTAKPFAR+RGPGGENPDAEAQR+TGSLDESLSR	1	.
IPI00653675	C1s	complement component 1, s subcomponent.	77500	Q8CG14,	1	125	ASGALINEYWVLTAAHVLEK+CIPACGVPTEPFQVHQR+CQPVYCGIPDPIANGK+EDFDVEPADSEGNCPDSLTFASK+EENPTVRPEDYVFTDNMICAGEK+FYVAGLVSWGK+IENFPWQVFFNHPR+ISDPLMYVGTMSVR+KVFVINLR+NYVDWILK+SPNSPIIEEFQFPYNK+TNFDNDIALVQLK+TNFDNDIALVQLKDPVK+VEEPENSVFGTVVHYTCEEPYYYMEHEEGGEYR+VFIHPSWK+VPVTSLETCK+VSPICLPGTSSEYNVSPGDMGLISGWGSTEK+VSPICLPGTSSEYNVSPGDMGLISGWGSTEKK+WVNDQLGIELPR	1	.
IPI00653910	Cic	isoform 4 of protein capicua homolog.	258130	Q924A2-4,	0.92	5	EMEGLADSGPGGTGRPAGVAAR+GEPPTPPSPAPATGPSGSSSGSSEGSSGR+KACPGLAGSASGSK+LSPGPSSHAGPPGTLPQAQQTLHR+QSSDSGVAR+RGYCSR+TELLPHPGTLGASGAGGGGAAPDFPK+TKEMEGLADSGPGGTGRPAGVAAR+TPEDASALGVPPRPPTSTR+VLSEVDFEER+VLVPLAAPSMSVR+VRPPPLKK+VTDSESGDSSGEDPEGNK	1	.
IPI00654069	Agt	angiotensinogen.	52670	P11859,	1	138	EGDCTSR+GSYNLQDLLAEDK+GSYNLQDLLAEDKLPTLLGAEANLNNIGDTNPR+HSFVQSLALFTPALFPR+LPTLLGAEANLNNIGDTNPR+LTLPQLEIR+SLDLSTDPVLATEK+STCAQLENPSVETLPESTFEPVPIQAK+TLHDQLVLAAEK+TLHDQLVLAAEKLEDEDR+VGEVLNSILLELK	1	.
IPI00654934	Golgb1	golgb1 protein.	370111	.	1	32	DQEMKELQGSLDSTLAQLAAFTKSMSSLQDDR+ELDGVQLQFCEQGTQMK+ELQGSLDSTLAQLAAFTK+EMEVEKEELELKVSSIASELAK+EQFLMAISDK+EQFLMAISDKDQQLGHLQSLLR+KLQEALIAR+KVSEIEDQLKK+LALGGLTEDK+QSLQMSSDALQK+SMSSLQDSR+TPIMGACGSQEQALLIDLPGHSCR	2	IPI00665421;
IPI00655161	Fry	similar to furry homolog (drosophila) isoform 1.	338694	.	1	11	CMMLTNVQMLNK+FVSSSQMLTSCSECPTLFVDAETLLSCGLLDK+GPPAMLPINVDPDSKPGEYVLK+HALAGLFVEILVPVAAAVK+KAVGNILR+KSTGQLNVNPGTPGSGGGGGGSGNTTTAER+KVATYLCR+LSIHMDDELR+LSNLAHVMTLYK+NEVNVPCLR+TLTMQPAYQPEYLYTGGFDFLR	2	IPI00848482;
IPI00656329	Kng1	kininogen 1 isoform 1.	73101	.	1	49	ATSQVVAGTK+ATSQVVAGTKYVIEFIAR+AYFPCIGCVHAISTDSPDLEPVLK+CPGRPWKPASWK+CPGRPWKPASWKDPNTETTEFSDFDLLDALS+CQALDMTEMAR+DAEEAATGECTATVGK+DAEEAATGECTATVGKR+DAETEQGPTHGHGWLHEK+DIPVDSPELK+DPNTETTEFSDFDLLDALS+EGNCSAQSGLAWQDCDFK+EGNCSAQSGLAWQDCDFKDAEEAATGECTATVGK+ENEFFIVTQTCK+EQEERDAETEQGPTHGHGWLHEK+ERFPSLHGDCVALPNGDDGECR+ESNTELAEDCEIK+ETKCSKESNTELAEDCEIK+EVLGHSIAQLNAENDHPFYYK+FPSLHGDCVALPNGDDGECR+GNLFMDINNK+…	1	.
IPI00660087	2410089E03Rik	2410089e03rik protein.	358550	.	0.93	26	ADSESSKNPQATAASSGHEPLK+EPEIPSVAPPSDR+ESDVDADCPAAVAAQEGTECWNR+FDIPFEMLEDDINTSAGLHFMASVR+GSLPSLGSFPESLLNYCK+KIPSLQPLLK+LPYLIISDGYMVTTLR+MPAEAENHDVK+NPQATAASSGHEPLK	1	.
IPI00662568	Polr3a	polymerase (rna) iii (dna directed) polypeptide a.	155738	.	1	32	KSTCHYCGAFNGTVKK+LSIMAHLARVKPHR+NGPDVHPGANFIQQRHMQMKR+QIFSVILRPSDDNPVRANLR+RHVMLLSDLMTYK+TCCHIMLSQEEK+TVISPDPNLR+YELLNAGYK+YGINDNGTTEPR	1	.
IPI00663304	.	similar to aaa-protein.	95813	.	0.96	7	CDGVGLPTEEK+CWHQLSLGAGESSMNPSATLYRR+SVIALSSLFTK+TAAQYLIICSGEK+YNSSASELIGMQPSQCVGSLK	1	.
IPI00663537	Wdr81	alpha-2-plasmin inhibitor.	222323	Q5ND34-1,	0.88	8	DRPGTGEDDLEQATEALDSISLPGK+EAGLLAAVTLTQK+FMQEVAAQNYR+KIIPNHELVGELAGLYLESMSPSSR+LQSFPGHTGAVK+LSLALPPGGQDQMAQGSR+MNHPGPITAHCWSSRPGTPEATAR+QGDPNYHPVLPWVVDFTTPYGR+QLALAPGGTHVVALVSTR+RHLLLGSDNGIIR+TADRSVSSQRPAHTGSSLR+VYGCTFLPVGESIPCLSNVR	1	.
IPI00663627	Flnb	filamin-b.	277753	Q80X90,	0.99	9	AGSNMLLIGVHGPTTPCEEVSMK+AGVENGKPTHFTVHTKGAGK+AHGPGLEGGLVGKPAEFTIDTK+APLIVQFSSPLPGEAVK+DAGYGGISLAVEGPSK+DLDIIDNYDYSHTVK+DQEFAIDTNGAGGQGK+EPGEYAVHIMCDDEDIK+GQHVTGSPFQFTVGPLGEGGAHK+KGEITGTVHMPSGKK+LENVSVALEFLDHESIK+NGNHVANSPVSIMVVQSEIGDARR+SGCTINNPAEFIVDPKDAGSAPLK+SPFGVQIGEACNPNACR+SSSDASKVTSK+TSRAPAVATVGSICDLNLK+VVASGPGLEHGK	1	.
IPI00664640	4921511H13Rik	similar to hcg401196.	264456	Q571H0-2,	1	15	AESDLFLDMESVASLELATDK+DAQGPGPALEAFVSAAKK+DPVLAPVVPEGVLEYCLARR+DVCSSLDLNK+DVLILLHK+FLDSNALGLTVAALSSYDPQMR+ISMECAEIFQLLSGEK+KASEGPSSAASPAGTVK+MMQTILHFPQYRK+MSGSPELR+RAPAAFLVSLYVK	2	IPI00668766;
IPI00664670	Flnc	isoform 1 of filamin-c.	292346	Q8VHX6-1,	0.91	33	AFGPGLEGGLVNK+ASGPGLNASGIPASLPVEFTIDAR+AWGPGLETGQVGK+CLVTVSIGGHGLGACLGPR+DTVEVALEDK+ECPEGHVVTYTPMAPGNYLIAIK+IQIGEETVITVDAK+LEPGGGAEAQAVR+SLTATGGNHVTAR+VCAYGPGLK+VHTPSGAVEECYVSELDSDK	2	IPI00753917;
IPI00664886	Thoc2	tho complex subunit 2.	182773	.	0.99	7	DVFNMFCYLGPHLSHDPILFAK+LTMVVLSSEK+VGDWQHAQNIMDQMPPYYAASHK	2	IPI00886313;
IPI00666034	Apob	apolipoprotein b precursor.	509432	.	1	72	AALTEVSLGSIYQAMILGADSK+AEMTGEHNANLNGK+DGLSTSATTNLK+DTYQNLYEEMLAQK+EVYGFNPEGK+EYLSMLTDINGKWMEKIAELSIVAK+FFSEGTNR+GFEPTLEALFGK+GFNTIDNIYIPAMGNFTYDFSFK+GLVHPLSTLISSSQTCQYTLDPK+GTVPTEMSTER+HVSEAVCDEQHLFLPFSYK+ITDNDVLIAIDSAK+ITEVSLVGHLSYDK+KGTVPTEMSTER+KMELEDEVR+LAAYLLLMK+LATAVSLTNK+LELANIQAELVAKPSVSLEFVTNMGIIIPDFAK+LSLEDTPK+MGLAFESTK+MGLSDFHIPDNLFLK+NLQQCDGFQPISTSVSPLALIK+NSEEFAAAMSR+QIVLYPDKDEPK+QMD…	1	.
IPI00667973	Cep170	isoform 1 of centrosomal protein of 170 kda.	175050	Q6A065-1,	0.98	13	ASVASEVSTTSSTSKPPTGR+EINDVAGEIDSVTSSGTAPSTTVSTAATTPGSAIDTR+IDLLAQPRR+KAEEIPK+LGEASDSELADADK+LLKQKSEEPSVSLPFLQTALLR+MQQQEQKEQAQWTPTK+MQSTGSAMPASSSFK+MSLTSWFLVSSGGTR+QNSSVPTALALTSASR+SKTSPVASGSTSK+STSCTTSLASQGER+TDEGPDTPSYNR+TRLGSLSAR	1	.
IPI00668724	Muc16	similar to mucin 16.	921633	.	1	36	AEEISTGMPTGPPNSIISK+AVNIINSTSSTPDVTFGSVLLK+ENCAMTSMLPALSGQVETK+ESTAPWVSYQAK+IEQMSGVLSTTNSSSAPK+ILQGLLGSLFK+ISQMTSVSSVTK+ITEVIPSEFTDIGPKR+KDMGRPGSR+KDTSGIESR+KVTSGILTAAISPSVTNMMTFTPVK+KYSLFQVGNINGSAMDAR+KYSLFQVGNINGSAMDARK+LDTSYGAESQSLTSTMGIFVDQAR+LFGPTISISSSIPDMK+LSDFVSDVISPAMTLSSESSTHAPTDLETTR+LTSLSSRK+MMTSTPITSELHATVSLVTHVGAQHSSTMSALTASPGK+MPSLFPSPSR+NPTQGQSVTTSWITHPGTEATSR+NYAMTSTLPASPGQAESK+S…	1	.
IPI00669273	.	similar to a disintegrin-like and metalloprotease (reprolysin type)with thrombospondin type 1 motif, 5.	42490	.	1	11	ASCETPASPSGPQESPSVHSR+DDTVGAAGSIVTAGGGLSASSGHR+EVGTEGGCPALGYK+QVELLLVADSSMAR+VGYLVYAGGR	1	.
IPI00669697	.	similar to kiaa1683 protein.	140835	.	0.98	4	EVLGPSVVK+IQPPGSAVASTIK+KPSAELLMSVQGMEK+LPAPVGPNSSLSNTTPQMQVR+SSSQIQPPPCHAR+TLCGGTTEAVASSPR+TSLQMRPMTR+VCPMAAAVPESSATMSTAPR+VVVQAVVTIQACAR+YQPCMLTK	1	.
IPI00669935	.	similar to thrombospondin 1.	138599	.	1	508	AGTLDLSLSLPGK+AQGYSGLSVK+AQLYIDCDK+AQLYIDCDKMESAELDVPIQSIFTR+CDNCPYNHNPDQADTDK+CEGSSVQTR+CGACPPGYSGNGIQCK+CNYLGHYSDPMYR+CTSYPDGSWK+DACPINGGWGPWSPWDICSVTCGGGVQRR+DCVGDVTENQVCNK+DDFDHDNVPDIDDICPENFDISETDFR+DGIGDACDDDDDNDKIPDDR+DLQAICGLSCDELSSMVLELK+DNCQYVYNVDQR+DNTGQIFSVVSNGK+FQDLLDAVWADK+FQMIPLDPK+FTGSQPFGR+FVFGTTPEDILR+FYVVMWK+GDACDHDDDNDGIPDDR+GDACDHDDDNDGIPDDRDNCR+GDVNDNFQGVLQNVR+GFIFLASLR+GQDL…	1	.
IPI00671014	AI848100	membrane protein ch1.	162545	Q8C341-2,	0.99	3	DPEDIPTFDEWKKK+ESSSASTSYYSQDDNCAIGSEDTQFQKK+KQMEEMQK+LLHLGLDSGCCGEDVPPPGR+LPKSNQYPSPKR+NNYASVECGAK+QELFDEDYDYPLDYNTVEDK+TSCSSASEWVGPAQVGRR	1	.
IPI00673290	.	similar to glyceraldehyde-3-phosphate dehydrogenase.	17798	.	0.96	1	LISWYDNEYGFSNR	1	.
IPI00676574	Herc1	hect (homologous to the e6-ap (ube3a) carboxyl terminus) domain andrcc1 (chc1)-like domain (rld) 1.	532660	.	0.9	1	CLGGMLQGSPVSPEEQDTAYWMK+EVVPLPQQVLCLK+GVTIPNSGADTLGR+HATLLGVVKEGSTSAK+ICDMQMR+LFSLLSDCMWETPIAQAK+LMDSTVPDEIQEVVIETLSVGATMLLPPLR+LPANTADISQRFQIMK+LQFLAGCFGLGTVGHTGTK+LVTSPNFVVTQALVALLADK+MELLHSLLPQGPDR+QQGVLGLNMAPCMR+QYSLQQTCVFNR+TVWSFGGGDNGK+VIEALQGMFIRK+WDPTGHILMTCAK+WITDNQDSADVDPQEHSFTRTIDEEAEMEELAER	1	.
IPI00676717	Btaf1	tbp-associated factor 170.	207046	.	0.99	5	EDVLQDLPPK+FMATQCFATLIR+HGAGTGLREILK+IATMETMNIFLEK+LDRLFILLDTGTTPVTR+MGDSTLEEMIQQHQEWLEDLVIR	1	.
IPI00677085	Prhoxnb	2-oxo-4-hydroxy-4-carboxy-5-ureidoimidazoline decarboxylase.	20017	Q283N4,	1	10	DLQQGTLTAESQR+EQSQAGLTSLDTDDR+LQQLNAQYR	1	.
IPI00677290	.	similar to murinoglobulin 1.	165370	.	1	90	AHFSVMGDVLSPAIK+DEILKSLDEEAIKENNSIHWK+DGSYSAFGDQNGER+DLFQCVSFIIPR+EGNTWLTAFVLK+ESVVFVQTDKPVYKPGQSVK+FQVENSNR+GDPIPNEK+GGVDDEMTLSAYITMALLESSLPATHPVVSK+HGIPFFVK+LQVTASPQSLCGLR+LSLVLPPTVVKDSAR+MLIYTILPDGEVIADSVNFEIEK+MLSGFIPLKPTVK+NKESVVFVQTDKPVYKPGQSVK+NLRPLNELFPLAYIEDPKK+SEHHLYKPQASSAEVEMNAYVVLAR+SLDEEAIKENNSIHWK+SLGNVNFSVSAEAQQSPEPCGSEVATVPETGRK+YMVLVPSQLYTETPEK	2	IPI00849570;
IPI00678003	Itpa	inosine triphosphate pyrophosphatase.	21897	Q9D892,	1	5	DFGWDPCFQPDGYEQTYAEMPK+GQTSGQIVMPR+KLEEVIQILGDNFPCTLEAQK+LKPEGLHQLLAGFEDK+LQEYFSVAAGAGDH	1	.
IPI00678133	Inf2	isoform 1 of inverted formin-2.	138560	Q0GNC1-1,	0.81	13	EPSAAPAR+EVTFLDSK+KQVFELLAALCIYSPEGHALTLDALDHYK+LLQMPSVVNYSGLR+LQASIEASQELDK+QLSQALDTSNVMVKK+RVNPPTLR+VAPTDPPK	2	IPI00762596;
IPI00678647	Scrt2	similar to transcriptional repressor scratch 2.	52841	.	0.97	11	AGRSGATAGGGHRHACAECGK+RAGAGGDAAGAGDAGGGGGGGGGGGER	1	.
IPI00719897	Try10	trypsin 10.	26221	.	0.96	68	LGEHNINVLEGNEQFIDAANIIKHPK+LSSPVTLNAR+TLDNDIMLIK+VCNYVDWIQNTIAAN	1	.
IPI00720238	Neb	nebulin.	800569	.	1	23	EDVSPGTAIGK+ENMGKATPTPFTPEMER+FSSLMDSMPMVLAK+GIGWMPNDSVSVNHAK+GIGWVPIGSLDVEKCK+GTPLPVTPEMER+HSLHHYTYLPDAMDLELSK+KAYDLQSDAVYK+KQLGHHIGFLSVQDDPK+KVTDDISK+NMMHIQSDNAYKEDYNTWMK+RAGEILSDR+RDWHDLIAK+TGMLPANYVEAI+YNTPHDMFDVVAAK+YSSPVDMLGVVLAK	1	.
IPI00742385	Mup3	mup3 protein.	21417	.	1	29	AGIYYMNYDGFNTFSILK+ENIIDLTNVNR+EPDLSLDIK+NFNVEQISGYWFSIAEASDER+TFQLMELYGR	1	.
IPI00749917	Stard9	start domain containing 9.	503833	.	1	39	AHGQSQEVQSK+ASGDVSTTHTPLGGSVMPVVVR+EEAPGPCPK+ETQQEGNCGEEK+ETTSQSTDLSGLEPAAGHR+EVTASCR+FNHPAEAAVLRHQR+GTPWAAAPPDHSLCIVPSTVCEVDGTGECLSR+GYNICLFAYGQTGSGK+ILHGQGQLTAR+KGTPWAAAPPDHSLCIVPSTVCEVDGTGECLSR+KVTTAPEDTFPSSPAGMSSEPLR+MGVGVNVLLPK+MQPSTKVRGHSCLAPQAR+NNSVDENGQASQTMPEPPAVTQGPGTLNSNECVDSK+NVDSGLACGGDSK+QPCQMSSQGQSTK+QPCQMSSQGQSTKK+SLHCLSSPVIVAGGR+VCECGNQLGILNK+VDTQLPTGPGLPR+VNNIDEMAR+VRPLSKRETK	1	.
IPI00750014	Fsip2	similar to fibrous sheath-interacting protein 2.	725820	.	1	95	ECTYGGNAPVSGLNENVCDLQSSWNVDK+EELLSNVDICSVASEIVENMLEK+EFFLSSPENSSCSQLTISSEDLVGYK+EISQMEPSPVSILK+ESEAVPSADK+HAALMSSDSDKDSK+IDPNIVSDHLAVISMK+IVHSCVCNIFK+KVASLIVDGVSSVPSCR+LGVPQMHPHADNLNALVLENTILPYSPLQIGK+LSKEHVSEMPRSSISK+LVNSMTK+MTWVVATVTSILYPAITK+NDLPTSSKTEIPK+NLGSPDVYQVPVNGK+RAAAELDMPSCK+SNSEAMPSGSR+SQESICENINSNGENLAK+SSQGSVSGMGFSSEDDMK+SSQGSVSGMGFSSEDDMKEK+TATSTSNLKR+TLSTDQMGLER+TQPLETLQMDCLK+TVP…	1	.
IPI00750472	Ptpn13	tyrosine-protein phosphatase non-receptor type 13.	270334	Q64512,	0.97	10	AISTGSLASSTINK+ANGLTSMEPSGQPALMPK+DDSTYTSSQDHQTSK+EAMNVEEPVRR+ELENLQELKPLDQCLIGQTK+EMALETAMTQR+FFMDDVSLIQHDLTCHQYYLQLRK+GTLRHIPESPFGLSGGLR+HIRRSGPVITHCSAGIGR+KSQTGILLGVCSK+QEPSSSLSTSNK+QSNQDAQDIER+QVINMEALPQAFAELVGKPLYPMAR+QYETSLEGNLINQDIMLRR+SGPVITHCSAGIGR+TSTPQMDALSKK+VNDTDVTNMTHTDAVNLLR	2	IPI00752690;
IPI00750482	Dcdc5	doublecortin domain containing 5.	142234	.	1	7	CSSAGPGGTSLQTLFR+ETQPCPK+FGFDLCPSDCFXQR+LPVLLLRK+QQDLSPGEXPRPCTGSVYDQSXK+RIXVTAVEMTXRR	2	IPI00849175;
IPI00750595	Myl9	myosin regulatory light polypeptide 9.	19854	Q9CQ19,	1	5	ATSNVFAMFDQSQIQEFK+DGFIDKEDLHDMLASLGK+EDLHDMLASLGK+FTDEEVDEMYR+GNFNYVEFTR+LNGTDPEDVIR	1	.
IPI00751401	.	similar to thap domain containing 6.	20360	.	0.9	2	GCSAIGCASR+KTIMELK+WVLAMKR	1	.
IPI00751628	Ccdc131	proline/serine-rich coiled-coil 2.	225054	.	1	6	FCRKPVSENSCSSDDEQSTGPIKYAFRPEK+HSAELIAMEK+KHSAELIAMEK+KHSAELIAMEKR+LANDAIVAEYLK+LDNSPISSPR+MAAAADPSTPASSGLSPK+QINVPALDTVVTPDDVR+QIQLELECINKDEKLALSSK	1	.
IPI00752684	.	similar to bridging integrator 2.	58986	.	0.92	1	ASPDASSNPEPAETR	1	.
IPI00752703	.	similar to complement component factor i.	71183	.	1	2932	ACNGVNDCGDQSDELCCK+AGTPVCAMNGR+AHSYQVWTALLDWLKPNSQLGIQTVK+CIEGTCICK+CIISGWGR+CNGEVDCITGEDESR+DGSIDACK+ECELPNSVPACVPWSPYLFQPNDR+EMQCAGTR+FSHNGTCAAEGR+GVETSLAECAFTK+LPYQCPR+QDADFPTSLSFQCVNGK+RTESSNGLAGVVCYK+SCNKVFCQPWQR+SFECLHPEIK+SGVCIPDQYK+SLVSQHNV+SYPTYCHQK+TESSNGLAGVVCYK+VANYFDWISYHVGR+VFCQPWQR+VIGGKPANVGDYPWQVAIK+YNGATFQNDIALIEMK	1	.
IPI00753038	Sord	sorbitol dehydrogenase.	38249	Q64442,	1	40	AMGAAQVVVTDLSASR+AVEAFETAK+EVGADFTIQVGK+GENLSLVVHGPGDIR+KPMVLGHEAAGTVTK+LENYPIPELGPNDVLLK+TLNVKPLVTHR+VAIEPGVPR+YNLTPTIFFCATPPDDGNLCR	2	IPI00875416;
IPI00754134	5830434P21Rik	novel protein.	170635	.	0.84	34	EGLVAEPEAQGDGGLSGSSLGEK+EGLVAEPEAQGDGGLSGSSLGEKK+ERREGLVAEPEAQGDGGLSGSSLGEK+KLEPGGFGEKPVRPGGGEPSPR+QSDTFGSR+REGLVAEPEAQGDGGLSGSSLGEK+RVDEKPGLGTVK+SFFQDDHGADSENAENRPFR+SSPYGTLKPEEISGPGLAESK+SYCASPGRPGGISAQR	1	.
IPI00754489	Papss2	bifunctional 3'-phosphoadenosine 5'-phosphosulfate synthetase 2.	70291	O88428,	0.97	3	DPAGMPHPETKK+EYLQTLHFDTLLDGVVPR+FALMYEGRR+GFTGIDSDYEKPETPECVLK+MIAGANFYIVGR+MVMESGDWLVGGDLQVLER	2	IPI00876410;
IPI00754924	Dact3	dapper homolog 3.	63287	Q0PHV7,	0.89	4	ARVPAPRGPAPSPSAPPR+GPAPSPSAPPR+SFSAPYPTAAAGAETCSSAER+SFSAPYPTAAAGAETCSSAERR	1	.
IPI00755058	.	downregulated in ovarian cancer 1-like protein.	129773	.	0.97	27	IQALTTSAKETQGKLALAEAR+ITILQNASITPIK+QLSEELESLNAR+VTSSITITPTATPLPR	3	IPI00876144;IPI00876452;
IPI00755694	.	similar to complement c4.	170383	.	1	50	AASWLTHQGSFHGAFR+ALVALGAVDMALYAVGGR+APHIQLVAQSPWLR+ASAGLLGAHAAAITAYALTLTK+ATETQGVNLLFSSR+CCQDGMTK+DHAVDLIQK+DQFQAALDK+DSSTWLTAFVLK+EELVYNLDPLNNLGR+EGAIHREELVYNLDPLNNLGR+EIFTSTSIFQDAFTIPDISEPGTWK+EPFLSCCK+FALMDEQGK+FALMDEQGKR+FHLHLR+FSLGSTISVK+FVSSAFSLDLSR+GHIFVQTDQPIYNPGQR+GLEEELK+GQIMAMGR+GTGFLSIEPLDPR+GVFDLGDAVSK+ILSLAQEQVGNSPEK+ITPWKPYILMVPSNSDEIQLDIQAR+KFHLHLR+KNDGSFGAWLHR+KYVLPNFEVK+LGLSGMAI…	1	.
IPI00756117	Dclk3	isoform 2 of serine/threonine-protein kinase dclk3.	88228	Q8BWQ5-2,	0.99	5	DLVEGPPAVEEGPIDMRR+EGDAFIAMGK+FPEPEAAVMITDLCK	2	IPI00849500;
IPI00756257	Ttn	isoform 1 of titin.	3906488	A2ASS6-1,	1	105	AGEPVNIPADVTGLPMPK+AGSMTVTVGETCALECK+AGTNVCLDATVFGKPMPTVSWK+ALDPFTTPSPPTSLEITSVTK+ALLLSQSLAEGCVESLEVPDVAVSNMR+ALVGGTAPMTIK+ASMADAGLYTCKATNDAGSALCTSSIVIK+ASNVAGSDTSK+ATNDVGSDTCVGSVTMK+ATSTAELVVQGEEVVPAK+AVNEAGVSKPSATVGPVIVK+AVPEAPTPVPK+CEAKEGAEWQLVSSAISVTTCR+CHYMTIHNVTPDDEGVYSVIAR+CTLAWSLPQEDGGAEITHYIVERR+DALCSIVCEER+DIENQTVLK+DPCDPPGRPEAIVITR+DPFDKPSQPGELEILSISK+DSMIVVWERPASDGGSEILGYVLEK+DSMTLCWS…	1	.
IPI00756400	Filip1	filamin a interacting protein 1.	137913	Q9CS72,	0.99	21	AGKPVVAAPGAGNLTK+ALRPSGNGRR+ELTLEIER+GAFADRPASPIQIMTVSTSAAPPEIAVSPDSQEVPMGR+GECGNSSLMAEVESLR+IPMSKGMK+KSAASSTASLGGGKG+QGQPLHIR+RHLKPSGESEKK+RSPGPAAAEGVSPVITVRPVNVTAEK+RTVYELENEK+SPGPAAAEGVSPVITVRPVNVTAEK+YPPAANELTMR	1	.
IPI00756793	.	similar to conserved nuclear protein nhn1 isoform 1.	106587	.	0.86	3	EQEPDFEEK+EQEPDFEEKK+LDYDEGVLEEPAPAAQEEEAEK+RDPSTQPPK+TPSSSGSGSGSSYSGSSSR+TSASSASASNSSR	1	.
IPI00756871	Usp24	similar to hcg33036, isoform 5.	303810	.	0.97	10	CMPEAFK+CSLSLGIXWR+DYCLNVWSILICGASYXMIXQLLK+EVEDPHGK+FLWTSLLEVK+FNADQLNHLFVLIQK+GALQIPPPAPAAAAVGPSVRPTPWNR+KCLLGYTR+KGSLICXR+KLLTSSAVHK+QSSSISQVPAPSWK+QTHTLTSVEDTGMPTCSSIK+RCQSIIGLHR+TMSLLVSLCTVGRPMQAITIPSLR	1	.
IPI00756894	Nsfl1c	nsfl1 (p97) cofactor.	37436	.	1	29	ASSSILINEAEPTTNIQIR+DLIHDQDEEEEEEEGQR+EANLLNAVIVQR+EFVAVTGTEEDR+LAHGGQVNLDMEDHR+SPGETSKPR+SPNELVDDLFK+SYQDPSNAQFLESIR+TGFSLDNGDLR	1	.
IPI00757292	Colec11	isoform 2 of collectin-11.	29526	Q3SXB8-2,	1	49	AIGEMDNQVTQLTTELK+DEAANGLMASYLAQAGLAR+EGAFVYSDR+GDSGDIGPPGPSGEPGIPCECSQLRK+KAIGEMDNQVTQLTTELK+NALPSPAAVAGLR+SPMQTFNK+VFIGINDLEK+YADAQLSCQAR	1	.
IPI00757330	Col22a1	collagen, type xxii, alpha 1 isoform 2.	160992	.	0.96	31	GDVGPAGPPGVPGSVVQR+GEPGDSGESGVPGMPGPR+GEPGIAGPSGR+GEVGLPGAPGFPGVHGEK+GFAGPLGLPGQK+GHDGAQGPPGAAGNPGAPGPAGPPGLSGPPGSLGSPGVR+GHTGLMGPQGQPGESGPPGPPGPPGQPGFPGLR+GPPGSSGSPGSPGDPGRPGALGQK+GTPGIPGSPGSR+TGPMGEPGRPGQGGLEGPSGPMGPK	2	IPI00881837;
IPI00757529	Dspp	dspp protein.	96285	.	1	72	DAEGGIISQSEACPSGK+DGNGSESIHVGGK+QGESDKPQGTAEK+SGGASDVSQNGDATLVQENEPPEASIK+SQVGIVENAEEAESSVHGQAGQNTK	3	IPI00828889;IPI00876242;
IPI00757677	Rtf1	rtf1 paf1/rna polymerase ii complex component homolog.	80797	.	0.86	3	EAMFSAGMQLPTLDEINKK+FNDQDIEEIVK+FNDQDIEEIVKEKER+GRVVIDSDTEDSGSDENLDQELLSLAKR+NISAISYINQRNR+NQQMDPFTR+WCHMPFFAK	1	.
IPI00758024	Prdx6	putative uncharacterized protein.	24827	.	1	111	DANNMPVTAR+DFTPVCTTELGR+DINAYNGETPTEK+DLAILLGMLDPVEK+FHDFLGDSWGILFSHPR+GESVMVVPTLSEEEAK+KGESVMVVPTLSEEEAK+LIALSIDSVEDHLAWSK+LPFPIIDDK+LSILYPATTGR+NFDEILR+VVDSLQLTGTKPVATPVDWK+VVFIFGPDK+VVFIFGPDKK	1	.
IPI00759878	C3	complement component 3.	186484	P01027-2,	1	7459	AAVFNHFISDGVK+AAVFNHFISDGVKK+ACEPGVDYVYK+ADIGCTPGSGK+ADLECTKPAAR+AFIDCCNHITK+AFYEHAPK+ALTQDDGVAK+AVLFNYR+AVMVSFQSGYLFIQTDK+CAEENCFMQQSQEK+CCEDGMR+DFDSVPPVVR+DHVLGLAR+DICEGQVNSLPGSINK+DILSSNNQHGILPLSWNIPELVNMGQWK+DLELLASGVDR+DLNMDVSFHLPSR+DNHLAPGQQTTLR+DSCIGTLVVK+DSITTWEILAVSLSDK+DSITTWEILAVSLSDKK+DTLPESR+DTWVEHWPEAEECQDQK+EADVSLTAFVLIALQEAR+EFNSDKEGHK+EPGQDLVVLSLPITPEFIPSFR+EVVADSVWVDVK+EYVLPSFEV…	1	.
IPI00759953	Try4	tesp4 protein.	26277	.	1	103	ENSIPYQVSLNSGYHFCGGSLINDQWVVSAAHCYK+ITNNMICVGFLEGGK+LASPVTLNAR+LGEHNINVLEGNEQFVNSAK+MNSLLFLALVGAAVAFPVDDDDK+MNSLLFLALVGAAVAFPVDDDDKIVGGYTCR+TLNNDIMLIK+VCNYVDWIQDTIAAN	1	.
IPI00761228	Ttc14	isoform 2 of tetratricopeptide repeat protein 14.	49486	Q9CSP9-2,	0.96	42	AIEDFELALENCPTHR+EFGFFMVLICLGSGIVR+GDIVIGRISSIREFGFFMVLICLGSGIVR	7	IPI00762518;IPI00816880;IPI00816931;IPI00855020;IPI00881544;IPI00881692;
IPI00761536	Dock5	dedicator of cytokinesis 5.	214429	.	0.95	72	AFGVAFVK+APEPDVMSPGK+EISVEEISPLENAIETMELTNER+KDWNLSKSQVIAEK+KSGILSSEPGSQ+LMNADGTTLQDGR+QLIMSPLITSHVIGENEPLTSVLNK+QSPHIGSFVACMIAVLR+QYLQCFTVKPVMSLPPSYK+RALFYENIIK	1	.
IPI00762154	Ryr3	ryanodine receptor 3.	551328	.	1	52	ALQEMLANTVENGGEGAAQGGGHR+ALSMLTEAVHCSGAHIR+DEPPTLESTVR+FCLAAEGLGNR+GAAEMVLQMISASK+GEGGNGLLAAMQGAIK+HGLPGVGLR+HGWVVQCLEPLQMMALHIPEENR+HSFSGMYLTCLTTSR+KYDLDLFR+LESSSGILEVLHCILIESPEALNLIAEGHIK+LPSLNKDGSVSEPDMAANFCPDHK+MAEAGEGGEDEIQFLR+NYMMSNGYKPAPLDLSDVK+QMVDTLVESSTNVEMILK+SFESASAFTMACVSVK+VLDVLCSLCLCNGVAVR+YNELMQALNMSAALTARK	1	.
IPI00762209	.	sterile alpha motif domain containing 1.	54533	.	1	31	AAPLAAPPPAPAAPPAAAPPAGPR+AAPLAAPPPAPAAPPAAAPPAGPRR+APPPAVAAR+EGGSACVGAAPDSPSPVPLPPGKPALPGADGTPFGCPPGR+GATPPAPPR+GGPAAPPPTPAPPPAPVAAPTR+LGALALPR+RGATPPAPPR+YLGGSGGASGR	1	.
IPI00762484	Dscaml1	down syndrome cell adhesion molecule-like 1.	230254	.	0.87	6	ATGDSEVYTLDNLK+DGQVIISGSGVTIESK+EFMSSLQISSVSLK+EPCPVVPPR+FAQYGVVVQAFNR+FFITSHGGLYISDVQK+GPPQGPRLHIDIPR+ITGLTISDLR+LFTIGCPVILATLGVALLFVVRK+NTELVLPGEAISIR+SQKQGAGAYSKSYTLV+VKLAAKNSVGSGR+VQLLIEDK+YTIFCSSPGSGQPAPSEYETSPEQLFYR	1	.
IPI00762553	Dst	dystonin isoform b.	834218	.	1	32	ALIEQKLNEVKMK+ANNSGVSLCNLLSALISPAK+DIIDELVTSGHK+DLEALHSLLKEISSHGLPGDK+EATDYLR+EMDHHFGMLELLNNTANSLLSVCEVDK+ENPEFPHGGMDESLGVENK+EPIALDPK+FILADGASQGMAAFRPR+IEQQYQSVLTLWHESHINMK+IKAQLVQHKEFQK+ISEIQMTAPLK+KYDAVCQINSER+LAGALAGLIAK+LAQDLVVEAADSK+LDNMLSELR+LGELCSEPPEHSESTSGSK+LLGAQLLSGGLIDCNSGQK+LTLGLIWTIILHFQISDIHVTGESEDMSAK+LVDETSIREMGFQK+MPDLGDLEDCK+NNIENLMSTLK+QKACMQTFLK+QLEAFELGLAPIAVFLRK+QLEGISVVAQ…	3	IPI00874675;IPI00874946;
IPI00762681	Mst1	adult male thymus cdna, riken full-length enriched library,clone:5830487a16 product:macrophage stimulating 1 (hepatocyte growthfactor-like), full insert sequence.	80597	.	1	211	AVCGPAGSQLVLLK+CDDDQPPSILDPPDQVVFEK+CGPLLDCR+CTEELVPEGCYHGSGEQYR+EAVCVLCNGEDYR+EFCDLPSCGPNLPPTVK+EQWVLTAR+GEVDVTESGR+GPWCYTTNR+GTTNTTSAGVPCQR+MAFCHQIPR+NGLEENFCR+NLLHTAVPGPWQEDVADAEECAR+NPDGDSHGPWCYTLDPDILFDYCALQR+NPDGSERPWCYTTDPNVER+QCIWSCHEPLTGYEVWLGTINQNPQPGEANLQR+SPLNDFQLFR+SVRFQSCGIKTCR+TAGGLPCQAWSR+TCNMDNGVSYR+VSVFVDWINK+VVGGHPGNSPWTVSLR+WDLQHPHSHPFQPEK	1	.
IPI00762874	.	msin3a-binding protein.	19845	.	0.85	63	MSPLPLR	1	.
IPI00775913	Apoa4	apolipoprotein a-iv.	45029	.	1	5247	AEVTSDQVANVVWDYFTQLSNNAK+ALVQQLEQFR+ANELKATIDQNLEDLRR+ATIDQNLEDLR+ATIDQNLEDLRR+EAVEQFQK+EKVNSFMSTLEK+ENVDNLHTSMMPLATNLK+ENVDNLHTSMMPLATNLKDK+GNTEGLQK+GSPDQPQALPLPEQAQEQAQEQAQEQVQPKPLES+KGSPDQPQALPLPEQAQEQAQEQAQEQVQPKPLES+KNAEELQTK+LGDASTYADGVHNK+LNHQMEGLAFQMK+LNHQMEGLAFQMKK+LQEHLKPYAVDLQDQINTQTQEMK+LQLTPYIQR+LVPFVVQLSGHLAQETER+MMPHANK+MMPHANKVTQTFGENMQK+MQTTIKENVDNLHTSMMPLATNLK+MQTTIKENVDNLHTSMMP…	1	.
IPI00776054	ENSMUSG00000069108	(strain 129 g-ix+) endogenous murine leukemia virus (fragment).	35158	.	0.99	8	CNPLVLEFTDAGK+CNPLVLEFTDAGKK+KASWDGPK+LTLSEVTGQGLCVGAVPK+NTPQNQGPCYDSSAVSSDIK+QVLNIGPR+VTYHSPGYVYGQFER+WGCETTGQAYWKPSSSWDLISLK	1	.
IPI00798521	Car1	carbonic anhydrase 1.	28331	.	1	174	ADGLAILGVLMK+DSISLSPEQLAQLR+EIVNVGHSFHVIFDDSSNQSVLK+GGPLADSYR+GLLSSAEGEPAVPVLSNHRPPQPLK+LTQFHFHWGNSNDHGSEHTVDGTR+LYPIANGNNQSPIDIK+TSEANHDSSLKPLSISYNPATAK+VGPANPSLQK+VLDALNSVK+YSGELHLVHWNSAK	1	.
IPI00798576	Vwf	isoform 1 of von willebrand factor.	309473	Q8CIZ8-1,	1	28	CVQSSDCPCVHAGKRYPPGTSLSQDCNTCICR+ECVSPCPR+HIVTFDGQNFK+ILAGPGASSNVVK+IPGTCCDTCEEPDCK+ISVLQYSYTVTMEYAFNGAQSK+KVIVIPVGIGPHASLK+RVSPPSCPPHR+SLSCRPPMVK+TSGVCVDWR+VCEVIASYAHLCR	1	.
IPI00808277	Foxk2	forkhead box k2.	85351	Q3UCQ1-1,	0.83	6	FAQSAPGSPLSSQPVLITVQR	2	IPI00854998;
IPI00808595	.	hypothetical protein loc74947.	146033	.	0.92	7	EMCDMDQALLR+ESTENTVSKLTLEIQMMK+FLDQSMDIDDVK+KITFNGGQLQPIHCQYETNIKSLESEVTCLQK+LSHALSEAAGQTAQMLER+SLESEVTCLQK+TEEAAAANKR+TISVASDMVSCLEQGNNAR+TVAATAMNSQSSR	2	IPI00849452;
IPI00816912	9130230L23Rik	9130230l23rik protein.	18020	.	0.83	1	MFCLHCDMK	1	.
IPI00828490	Hcfc1	host cell factor c1.	215051	Q61191,	0.96	9	GPLPAGTILK+KAWNNQVCCKDLWYLETEKPPPPAR+LLVFGGMVEYGK+LVTPVTVSAVKPAVTTLVVK+NGPPPCPR+QETAASLVTSAVGQQNGNVVR+RPMSSPEMK+SPDGAHLTWEPPSVTSGK+TIPMSAIITQAGATGVTSSPGIK+VASSPVMVSNPATR	2	IPI00828543;
IPI00828560	Ltbp1	latent transforming growth factor beta binding protein 1 isoform ltbp-1l.	186717	.	0.96	6	CEYCDSGYR+CFQETIGSQCGK+CTCGQGYQLSAAK+DSDDYAQLCNIPVTGRR+GAEPEVVTAPPEK+HCQDIDECQQGNLCMNGQCR+LEPGQPQLSPGVSTIHLHPQFPVVVEK+NGYCLNTQPGYECYCK+QSYHGYTQMMECLQGYK+QSYHGYTQMMECLQGYKR+VCTNGSCTNLEGSYMCSCHR+VVICHLPCMNGGQCSSR+WGLLLWAGLLAWSAHGRVRR+YGQEQGTAPFQVSNHTGR	1	.
IPI00828867	1110001D15Rik	collagen alpha-4(vi) chain.	250798	A2AX52,	1	14	ADIYFLIDGSGSIKPNDFIEMK+CRPALGCQLRAPGPQKLDMDLVFLVDSSQGVSR+DRADTEDIDQETPAK+FTEAFLNLLNSGINQYPPPELVK+GDPGTQGNPGLPGPSGSK+GEPGHPGPQGPR+GEVGPAGERGPRGQQGPR+GNPGEEGVGGLDGEQGDR+KLCPEMLSGMPPLMSFIPESTR+LCPEMLSGMPPLMSFIPESTR+QLMLDVNMFIQGSPKPPR+RLLPELMQQLAFLSNISCEAPGQMEPR+SQGIFLGER+TRNEMVAHIHELLVFQGGSR+VASVALQEALGSHGK+VGLAQYSDTPTSEFLLSVYHR	1	.
IPI00828873	Hbb	beta-2-globin (fragment).	15747	.	1	2021	DFTPAAQAAFQK+DFTPAAQAAFQKVVAGVATALAHKYH+GTFASLSELHCDK+GTFASLSELHCDKLHVDPENFR+KVITAFNEGLK+LHVDPENFR+LLGNAIVIVLGHHLGK+LLGNAIVIVLGHHLGKDFTPAAQAAFQK+LLVVYPWTQR+LLVVYPWTQRYFDSFGDLSSASAIMGNPK+SAVSCLWAK+SAVSCLWAKVNPDEVGGEALGR+VHLTDAEK+VITAFNEGLK+VNPDEVGGEALGR+VVAGVATALAHK+VVAGVATALAHKYH+YFDSFGDLSSASAIMGNPK+YFDSFGDLSSASAIMGNPKVK	1	.
IPI00830223	Tpm1	28 kda protein.	28343	.	1	4	ETAEADVASLNR+IQLVEEELDR+MEIQEIQLK+MELQEIQLK+SLQEQADAAEER	6	IPI00830333;IPI00831330;IPI00831423;IPI00831431;IPI00831626;
IPI00830478	BC010304	hypothetical protein loc218236.	121646	.	1	13	AFLACMR+QSILEGLSFSR+QYVYGVLFSLAESRK+SQGAIQGRPPYAASAEEVAK+SQGGVQPIPSQGGK+VTAASGHCGAFSGSDSSR	1	.
IPI00830749	Col6a3	col6a3 protein.	288695	.	1	13	EELSSLKPILTPSTGAGVGSKK+EVQVSEVTENSAR+FWYGGCGGNENR+GELGEIGLDGLDGEEGDK+GTPGEPGADGPPGPKGIR+HAQVISSSGIVSLGIGDR+HLPLVAVFSLLLSGIATTHAQQHGVMEVNK+ISCSGNQLPTVR+KSALLDSIQNLQVALTSK+LLVLITGGK+RDIVFLVDGSSSLGPSNFNAIR+SDDEVDDSAVELK+TQPPPLQAAHR+VMLSFGPSGATPQPPGVDLPSPSRPEKK	1	.
IPI00831055	.	beta-globin.	15721	.	1	98	AAVSGLWGK+DFTPAAQAAFQK+GTFASLSELHCDK+GTFASLSELHCDKLHVDPENFR+KVITAFNDGLNHLDSLK+LHVDPENFR+LLVVYPWTQR+LLVVYPWTQRYFDSFGDLSSASAIMGNAK+MVHLTDAEK+VITAFNDGLNHLDSLK+VNADEVGGEALGR+VVAGVAAALAHK+YFDSFGDLSSASAIMGNAK	1	.
IPI00831484	.	predicted gene, 382044.	62197	.	1	729	AEEVAFWTELLAK+APEEILAEK+DAGVSTYMYEFR+DLLLDMFSDVFFGIPAVLLSR+EGYLQIGATTQQAQR+FAPPEPAEPWSFVK+FWANFAR+GNWAHLDQLAALR+LGIWGLFSTGDEHSR+LKAEEVAFWTELLAK+MNEETASLLLR+MNEETASLLLRR+NATSYPPMCSQDAVAVQLLSDMLSTK+NATSYPPMCSQDAVAVQLLSDMLSTKK+NGNPNGEGLPHWPEYDEK+NGNPNGEGLPHWPEYDEKEGYLQIGATTQQAQR+QEFGWIIPTMLGDLLSEGK+SFSTVPYIVGFNK+YRPSFVSDK	1	.
IPI00845596	Mllt4	isoform 3 of afadin.	206499	Q9QZQ1-3,	0.99	3	RQQQLEEMR+TAEESDR	5	IPI00853902;IPI00885322;IPI00885906;IPI00886126;
IPI00845802	Hba-a2	hemoglobin alpha, adult chain 2.	15112	.	1	3839	FLASVSTVLTSK+IGGHGAEYGAEALER+KVADALANAAGHLDDLPGALSALSDLHAHK+LLSHCLLVTLASHHPADFTPAVHASLDK+LRVDPVNFK+MFASFPTTK+MVLSGEDK+TYFPHFDVSHGSAQVK+TYFPHFDVSHGSAQVKGHGK+TYFPHFDVSHGSAQVKGHGKK+VADALANAAGHLDDLPGALSALSDLHAHK+VDPVNFK	1	.
IPI00845840	Pkm2	isoform m1 of pyruvate kinase isozymes m1/m2.	57985	P52480-2,	1	39	AEGSDVANAVLDGADCIMLSGETAK+CDENILWLDYK+EATESFASDPILYRPVAVALDTK+GADFLVTEVENGGSLGSK+GDLGIEIPAEK+GSGTAEVELK+GVNLPGAAVDLPAVSEK+ITLDNAYMEK+IYVDDGLISLQVK+KGVNLPGAAVDLPAVSEK+LDIDSAPITAR+LLFEELVR+LNFSHGTHEYHAETIK+MPKPHSEAGTAFIQTQQLHAAMADTFLEHMCR+NTGIICTIGPASR+VNLAMDVGK	1	.
IPI00845851	Syne2	synaptic nuclear envelope 2.	782725	.	1	21	AEQLLGQR+ASALAKSIK+CASEIHTTLQSSQGGALEER+CTLEVLAAKNSALK+DCMEEISLFTENK+DPTAPAVKHR+DQGLGDCGTTQQEAEALSWK+EAISEMISWMNAVEPQAAGK+EAQQEDEQLATLTGQQPGAFDR+EEFSDHLEVVDK+EEGIISQQASYMGK+EENDSGTGGMEAK+EEYMMLEK+ETWEAFGEQVEAEMCGLR+GHVLLDLLEVLSGQQLPR+HEISLYLQQLK+INNGLHCVEKMLQQKSR+IQDQPPGNSSGTSLSK+KCDISRLVTQWR+LEDVLDSMWGILR+LIHDGILGNQQAVELLVEEVR+LKLCAEENSRLQEALQNMLLELQPR+LVLEGEKYLQSKEDLR+NTMAELVVPIALLPDNILSQIRK+QE…	1	.
IPI00848475	.	similar to coup-tfi.	97665	.	0.83	8	APGAGERVCVR+CLPEWLAASGPGPGPQTPERPDPR+LGTGAEAGGLHGFSISASCR+QDSGGGTGSTGLGSLSGCGPDSGSDSRPGPGSSSGAR+YGSQCMQPNNIMGIENICELAAR	1	.
IPI00848478	Aim1	absent in melanoma 1.	184731	.	1	10	APAAADSGEEAGR+EAQLPSCHSNEPEVVSVTTCVPQHEDAPDTSPK+EDVNSQGNLQLPENNLSDLPKLKNSDGVEGILK+EGGLPCGSDK+EQPHLAPHNSLK+GGAQYDQNHIILNTVSTEK+ISSVQPICLDSFTGPR+KEGGLPCGSDK+KMDSAVCVPQKK+LENSTLFSSMLSSLPQDK+LGSSHMEK+MDSAVCVPQKK+RAPAAADSGEEAGR+VKSVQAVPDGGAAPVACPEPK	1	.
IPI00848693	Mgam	similar to maltase-glucoamylase.	413629	.	1	36	ASTYSNAFPSTPVNK+AYVAFPDFFR+FSGFPALINR+GELFWDDGESK+GELFWDDGQSK+IDCYPDQHGASETSCTAR+LPSTYIYGFGETEHTTFK+MESDVVNTNAGFTATLK+QFLLGPAFLVSPVLEPNAR+QNGNLLQMSPQVTYNPNLK+TLCMESEQILPDGSR+WGGHWLGDNTAAWDQLGK+WMQLGAFYPFSR+YEVPHEHVQPFSGNAPSSLNYK	2	IPI00849818;
IPI00848707	Arid1b	at rich interactive domain 1b.	237795	.	0.94	15	DIVTPEAWR+EIGGLAQVNK+EITFPPGSVEASQPILK+EMSMALLSNLAQGDTLAAR+KAQEAAAAVMQAAANSAQSR+LVLETLCK+MQGPGQMQPHGIPPQMMGGPMQSSSSEGPQQNMWATR+QQGGGMMMGPGGGGAASLSK+RHMDGMYGPPAKR+SGPISPASIPGSQMPPQPPGSQSESSSHPALSQSPMPQER+SHPAMSPGTPGPTMGR+SSPALAAPDASVDPK+TDDMMVPEQR+VMPTVPTSQVTGPPPQPPPIRR+VYELGNEPERK	1	.
IPI00848780	Masp1	mannan-binding lectin serine protease 1.	79968	.	1	31	DNEVMDTFQIECLK+DQVLVSCDTGYK+EDEELSCDHYCHNYIGGYYCSCR+FPENLMEIEIPIVNSDTCQEAYTPLKK+HGLVTFSTR+IEPSQAVYSFK+IVDCGAPAGLK+SLPTCLPVCGVPKFSR+SPEPISTQTHSVQILFR+TGTITSPDYPNPYPK+TTLHPLYNPSTFENDLGLVELSESPR+VECSGNLFTQR+VETEDQVLATFCGR+YGVYSYIYPNK+YSCQQPYYK	1	.
IPI00849879	.	similar to glyceraldehyde-3-phosphate dehydrogenase.	39968	.	1	74	GAAQNIIPASTGAAK+IVSNASCTTNCLAPLAK+KLTGMAFRVPTPNVSVVDLTCR+LISWYDNEYGYSNR+LVINGKPITIFQER+MQLAQNFPGCK+VIHDNFGIVEGLMTTVHAITATQK+VIISAPSADAPMFVMGVNHEK+VPTPNVSVVDLTCR+VVDLMAYMASK+WGEAGAEYVVESTGVFTTMEK	1	.
IPI00850356	Gm1966	similar to very large inducible gtpase 1.	279333	.	1	19	CNEHISLKK+EVYPAECPVWAAVHSQCGQVYQGGLYAAPECGR+EXLETCEPPALNSMETELTWR+HLALNDDESIK+KQLQSLCHEK+LENDLRLLIEGDYKATTDSLQMDEVK+QTTSSLMFVLVMXQVILPSFXMTSR+RDSXLYFR+WASGGLVLQGIYK+YPSGIFQEGQK	1	.
IPI00850362	Thada	isoform 1 of thyroid adenoma-associated protein homolog.	218589	A8C756-1,	0.82	4	FPELYPFLLK+GAFELAYTGFVKLTEILNR+KSTPDSENGSIR+LLACLEGK+LPLNDLR+QDALPAVLSASSPQQLTR+REMQVAALTVCHQDMETLR+SAECTSIPEWLMNSCR	2	IPI00875059;
IPI00850484	BC059842	similar to hcg2036582.	360617	.	1	15	AGNSTQASGDSTLPSQSVVIPGVLR+EDGGPGAECR+EWGPLPPEPR+GGGPLSLDTFPFDEALR+GXATCAEASVLCGAHQPTR+SASSSLASLSR+SPLDMASSR+TPCMVLRLGFPIGTPAQARHK+VFEQHLGSEPDVFSPCSPGQLGPAPRPAAQR+WSGTXXICPGVSMAXLWLLSGLGR	1	.
IPI00850983	Synj1	similar to mkiaa0910 protein.	188521	Q8CHC4,	0.88	5	EECLMFESGAVAVLSSAEK+EFGGVGAPPSPGVARR+TGMGGATGNK+TNSVQAFLGLEMLAK+VCAGRPTPDSQSKPSETLK+VCVGTWNVNGGK	3	IPI00881169;IPI00881540;
IPI00853954	.	similar to tweak.	28319	.	0.83	3	AIAAHYEVHPRPGQDGAQAGAIHIPK	1	.
IPI00853986	ENSMUSG00000075231	envelope glycoprotein (fragment).	23390	.	1	24	CNPLVLEFTDAGK+CNPLVLEFTDAGKK+KASWDGPK+LYFDLCDLIGDDWDETGLGCR+NTPQNQGPCYDSSAVSSDIK+TFDFYVCPGHTVPTGCGGPR+WGCETTGQAYWKPSSSWDLISLK	1	.
IPI00855078	.	sushi domain containing 5.	66803	.	1	7	DCASAVCTTGWLADGTLGTTVCSK+DEERPCGDPPSFPHTILQGR+DEGDETKEPLPAR+ETAFTLLCNSCGEWYGLVQACGK+GAHLVSAAELK+MSAGPLWPAPGSLPALCAALLLLALQPPPVR+TGLEMGDELLYLCAPGSVPGHR	1	.
IPI00855108	Hbb-b1	beta-globin (fragment).	5690	.	1	8	AAVSCLWGK+AAVSCLWGKVNSDEVGGEALGR+LLVVYPWTQR+MVHLTDAEK+VNSDEVGGEALGR+YFDSFGDLSSA	1	.
IPI00855152	Obscn	isoform 1 of obscurin.	966372	A2AAJ9-1,	1	20	ADAGEYSCEAEGQK+AEGIPPSPPGAGTR+AELLVHGGDKLDAENQVYRR+AENPLGSASAAAALVVDSDAEVAGPPGTSTATLLAHLQQR+CHLAVQGPVHILTLSALQPQDSGLVAFR+DAALSDAGEVVFSVLGLTSK+DGQPLTTSDHIRMTDK+EDAGEYSCTCGSQTTSATLMVTAAPVR+EEQASLMTK+EGFLQESVPFPPMSGDSRPGK+EGVELHVGSK+EVPARLHGAQLK+FQMTSEGPRR+HHCGAGHTLPAHSAQGDPGGCWDHHSPSGLMLLR+KAGGPGISPLASK+KEEATEGTMVTLR+KLEPQTVEER+LDVAEAESQIPERPSR+LIVTELPVSFTR+LSPEWGPTEAPEFPGEAVSEDEYR+MDHSFSGAPR+NAAVL…	1	.
IPI00855153	.	similar to hcg2011852.	330490	.	1	11	AFSSHDDCEVQESHFCESHSSSGSQK+FETFSGRVATTSPSEENGDNSRER+KELGHSMQHQSTLELK+KELGHSMQHQSTLELKR+KPVAVSALNASLSSMPMSLDVSTCNGLK+KTMSETK+QNPSLQVFQPGQHLGADVDQR+RINMKVR+RKPDPFKPEVFSANMVHPK+SAAADINMSSK+SCHAHPTDK+TAFYSRIPQRSMAEENPK+TIPVSLFLGPGGR+VETDSLGLDNSR+VNNDEINTDIK+VQEDALQNALK	1	.
IPI00856307	3110003A17Rik	hypothetical protein loc73112.	9058	.	1	8	CANLFEALVGTLK+FGVLFQDDR+IVTYAGELLLQGVHDDVDIVLLQD	2	IPI00903413;
IPI00857142	OTTMUSG00000012493	17 kda protein.	17365	.	1	6	AGEYSVTYDGFNTFTIPK+DGETFQLMGLYGR+DGETFQLMGLYGREPDLSSDIK+EKIEDNGNFR+ENIIDLSNANR+EPDLSSDIK+EPDLSSDIKER+FAQLCEEHGILR+FHTVDEECSELSMVADK+FHTVDEECSELSMVADKTEK+IEDNGNFR+INGEWHTIILASDK+INGEWHTIILASDKR+REKIEDNGNFR+TDYDNFLMAHLINEK	1	.
IPI00858277	Nlgn4l	neuroligin 4*.	97303	.	0.8	2	LACPPDYALTLR+NPRPDPGPAGRR+RGGECGAVVTAMAAEASAGGLGHDGVGGVGVGGVIGGVAGLR+RPAVMTSSSMASGSGMTSSSGSGMTSSSGSSASAVLIETRR+RSPDDVPR	1	.
IPI00869381	Apoa2	apolipoprotein a-ii.	11309	.	1	593	AYFEKTHEQLTPLVR+QADGPDMQSLFTQYFQSMTDYGK+QADGPDMQSLFTQYFQSMTDYGKDLMEK+RQADGPDMQSLFTQYFQSMTDYGK+SAGTSLVNFFSSLMNLEEKPAPAAK+THEQLTPLVR	1	.
IPI00869465	Kif26b	kinesin-like protein kif26b.	225555	Q7TNC6,	0.95	31	CEPLPSSLK+CSSGHGSDNSSVLSGELPPAMGK+EGGSGLCLSLSALGNVILALVNGSK+ESLNSCGFVEGKPRPMGSPR+ICSTSAR+LLLPGPLPGK+QITLYDPLTCGGQNAFQK+SLPQSVGQSSNLPPSGK+SNQQDCDEDDHR+TNITVYPCIAMSPR+VVDGCEMALPGLVAQSPLHVNR	1	.
IPI00874299	Cmya5	357 kda protein.	357394	.	0.81	29	DHEVSALDTAISAVK+ENEAVGELQR+FVMPELSLGASVAAEDGSVQPRPLSK+GAEHSPPAPPALPALMEEMGK+MEPPSIPATMVLER+QEYPPAAMPVPGASAVSLDK+QLSEVPTAGSELIDSR+SELGSGLPLPSMSTSEVLRPEPK+SWMSSLLFGSSIPDSK+VGMEEAQNMAPLHITESQRR+YTLIDYNLSPGSGK	1	.
IPI00874570	Cp	0 day neonate lung cdna, riken full-length enriched library,clone:e030019d07 product:similar to gpi-anchored ceruloplasmin.	124140	.	1	1437	ADDKVLPGQQYVYVLHANEPSPGEGDSNCVTR+AEDEHLGILGPPIHANVGDK+AGLQAFFQVR+ALYFEYTDGTFSK+DCNKPSPEDNIQDR+DIASGLIGPLILCK+DIASGLIGPLILCKK+DIFTGLIGPMK+DLYSGLIGPLIVCR+DNEDFQESNR+DNEEFLESNK+DTANLFPHK+DVDKEFYLFPTVFDENESLLLDDNIR+EDSACIPWAYYSTVDR+EEFFIGSK+EFYLFPTVFDENESLLLDDNIR+EMGPTYADPVCLSK+ETFTYEWTVPK+EYEGAVYPDNTTDFQR+EYTDGSFTNR+EYTDGSFTNRK+GPDEEHLGILGPVIWAEVGDTIK+GQHPLSIQPMGVSFTAENEGTYYGPPGR+GTFDVECLTTDHYTGGMK+…	1	.
IPI00874975	Afm	isoform 1 of afamin.	69379	O89020-1,	1	1183	AAPITQYLK+AAPQLPMEELVSLSK+ADTTYELPSVSALVSALHTDWCQPRKEDLQNK+ANVGFLPPFPTLDPEEK+ASSSYQR+CWADNTLPECSK+DDRPEGLSLR+DLTTLLEDVSSMYEGCCEGDVVHCIR+DSDPDKFFAEFIYEYSR+EACIINANKDDRPEGLSLR+EECSEVQEPESCFSPESSK+FFAEFIYEYSR+FLVNLVK+FTESENVCQER+HPDLSTPELLR+KANVGFLPPFPTLDPEEK+KEDLQNKK+LCFFYNK+NPFVFAPVLLAVAAWFEEAATTCCEQQQK+NVCGALIK+QFQELGK+QFQELGKDTLQR+RHCFEHLK+RHPDLSTPELLR+RLCFFYNK+SLAMVQQECK+SQSQVVNHICSK+TANDAIQDML…	1	.
IPI00875333	BC031353	isoform 1 of uncharacterized protein kiaa1370.	119266	Q69ZK7-1,	0.96	54	AFHPQTGLPLLSSPVPQR+CPSSSQSLCSK+ENVQHTAQLLR+SFVFFSQLSAWLSVSHGAIPR+SYTESPTNPQFSPRC+VSVQSLPR	2	IPI00881423;
IPI00875672	Vcan	versican.	366894	.	0.98	2	EVEEEGMSIAHMSTPGPGIK+FPTTPSDISVFTAIDSLHR+GPDSTVASTTAFPWEEVMSSAEGSGEQLASVR+KREEDEEGAVNAAHQGEVR+LSDMIVSGHPIDSESK+QAEDISFSFATGIPVSSTETELHTFFPTASTLHIPSK+QLVTTVPK+TQELSTSTPAAGTK	1	.
IPI00877270	Amy1	amylase 1, salivary precursor.	57644	.	0.97	3	ALVFVDNHDNQR+EVSINPDSTCGNDWICEHR+FFLLLSLIGFCWAQYDPHTQYGR+HMWPGDIK+MAVGFMLAHPYGFTR+SGNEDEFR+TAIVHLFEWR+TASGGIENYQDAAQVR+VADYMNHLIDIGVAGFR+YQPISYK	1	.
IPI00881909	Col12a1	procollagen, type xii, alpha 1.	333730	.	0.85	6	AAPGKVVNYR+CPALPNACTCTQDSVGPPGPPGPAGGPGAK+EVSTPANQRR+GPPGPGSPGVTGPSGKPGKPGDHGRPGQSGLK+GPPGPPGPQGESR+ILLTPMAAGSR+IVYSPVAGTRPSESIVVPGNTR+KSLLQAVANLPYK+LDTSTVLK+LTWSQAPGRVLRYR+QMVAKVPPTVTSTVLKR+SLYDDIEAGETTLPGDAIHTMIENLQPETK+VQVECSR+VTFHPTGDDRR	1	.
IPI00885230	Ecm1	26 kda protein.	25561	.	0.94	3	AALILACLALASAASEGAFKASDQR+AGPAVPQEAIPLQK+EIDPPAQPQEEIVQK+EQPPPQVHIEQK+EVKPHTLAGQLPPEPR+HCQQGR+LDGFPPGRPSPDNLK+LFQHLHEVGYAAPPSPPQTR+LRVDHSVTSLHDPPLFEEQR+QHVIYGPW+QICLPER+VDHSVTSLHDPPLFEEQR	1	.
IPI00885334	Ecm1	osteoclast-like cell cdna, riken full-length enriched library,clone:i420016i18 product:extracellular matrix protein 1, full insertsequence.	62718	.	1	36	AALILACLALASAASEGAFKASDQR+AGPAVPQEAIPLQK+AWEGTLDGYCER+CCELPYPEQACCGEEEK+CCELPYPEQACCGEEEKLAFIENLCGPR+DECFAHLAPYPNYDR+DILTLDLSR+DPALCCDLSPEDK+ENPPAQPQEEIVQK+EQPPPQVHIEQK+EVKPHTLAGQLPPEPR+EVQPPSSPEDIPVYEEDWPTFLNPNVDK+GTDANPAPGSK+GTDANPAPGSKEE+HCQQGR+LAFIENLCGPR+LDGFPPGRPSPDNLK+LETEFQR+LFQHLHEVGYAAPPSPPQTR+LRVDHSVTSLHDPPLFEEQR+LVWEDAMTQFCEAEFSVK+NICLLR+NLPATDAIQR+NSWKDPALCCDLSPEDK+NVALVAGDTGNATGLGEQ…	1	.
IPI00885439	Capn3	mup48.	48398	.	0.97	97	HTNLPTLILSYSCK	1	.
IPI00885525	.	novel protein.	174926	.	0.82	1	EQHWGKFCASLK+KALASASVTSAGSMTR+KEALIQSFSEFMASEEIQEPPEVKK+QLDTYHMDCMSLVHFLYEK+RGIGPAVKMSPVGK+RIEQHR+RILQISQAK	1	.
IPI00885793	Fga	fibrinogen, alpha polypeptide isoform 1.	87429	.	1	3791	AENPTNPGPGGSGYWRPGNSGSGSDGNR+AQLIDMK+AQQIQALQSNVR+AVTSKGDKELLIGK+DCDDVLQTQTSGAQNGIFSIKPPGSSK+DGGSRGDSPGDSR+DSDWPFCSDDDWNHK+DSDWPFCSDDDWNHKCPSGCR+EAYAEYHFR+EINLQDYEGHQK+EKVTSSGTSTTHR+EVITSDDGSDCGDATELDISHSFSGSLDELSER+EVVKEVITSDDGSDCGDATELDISHSFSGSLDELSER+GDFANANNFDNTYGQVSEDLR+GDFANANNFDNTYGQVSEDLRR+GDKELLIGK+GEFLSEGGGVR+GEFLSEGGGVRGPR+GEGEFWLGNDYLHLLTLR+GLIDEANQDFTNR+GLIDEANQDFTNRINK+HPDLSGFFDNHFG…	1	.
IPI00885860	Apoc3	15 kda protein.	15163	.	1	5098	AEEVEGSLLLGSVQGYMEQASK+AWDSWYVGAMQPR+FTDKFTGFWDSNPEDQPTPAIES+FTGFWDSNPEDQPTPAIES+GWMDNHFR+TVQDALSSVQESDIAVVAR	1	.
IPI00886028	Igf2	21 kda protein.	21061	.	1	14	DPAHGGASSEMSSNHQ+DVSTSQAVLPDDFPR+MGGSVAGFQVPMGIPVGK+SCDLALLETYCATPAK	1	.
IPI00890117	Cfl1	cofilin-1.	18560	P18760,	1	78	AVLFCLSEDK+AVLFCLSEDKK+EDLVFIFWAPENAPLK+EILVGDVGQTVDDPYTTFVK+HELQANCYEEVK+HELQANCYEEVKDR+KAVLFCLSEDKK+KEDLVFIFWAPENAPLK+KSSTPEEVK+LGGSAVISLEGKPL+MIYASSK+NIILEEGKEILVGDVGQTVDDPYTTFVK+YALYDATYETK	1	.
IPI00890309	2610016E04Rik	hypothetical protein loc100039008.	20682	.	1	70	AGEYSVTYDGFNTFTIPK+DEECSELSMVADK+DEECSELSMVADKTEK+DGETFQLMGLYGR+DGETFQLMGLYGREPDLSSDIK+EKIEDNGNFR+ENIIDLSNANR+EPDLSSDIK+EPDLSSDIKER+FAQLCEEHGILR+FHTVRDEECSELSMVADK+FHTVRDEECSELSMVADKTEK+IEDNGNFR+INGEWHTIILASDK+INGEWHTIILASDKR+LFLEQIHVLEK+REKIEDNGNFR+TDYDNFLMAHLINEK	2	IPI00895984;
IPI00890914	Depdc2	isoform 1 of dep domain-containing protein 2.	181716	Q3LAC4-1,	0.98	13	EEAMIFAVGLCDNGFMHHVLEK+ENEMETCEASRR+EVEMSVCQIDDLLSSITYSPKLERK+FFADEEMEGSNMK+FNTMAIIDGK+HSDYTAVMEALQAMK+KNTDVPLEGYLVTPIQR+LIDWLIAQGDCR+LVEKGSNAEMAGMEVGKK+QDPWNLPSSIQALAQSIRK+RIAACVNTPCSASGVGLLSVSSELCDR+VSFFFKPSEEDPLVANVPLTYQVEGSR+WFVCMAK	1	.
IPI00895001	.	complement component 4 binding protein.	35203	.	1	156	AIISCSFSK+GVAWSNPFPECVIVK+HSGTEDFYPYNHGISYTCDPGFR+IICSQPNILHGVIVSGYK+ITLVTYECDK+LTLEVELLQLQIQK+MALEIYK+TMQYVPNSHDVK+TVPVWSSSPPTCEK+XFILVGSSTSSCEVR	1	.
IPI00895973	Mup1	mup1 protein.	10797	.	0.91	13	AGEYSVTYDGFNTFTIPK+DGETFQLMGLYGR+DGETFQLMGLYGREPDLSSDIK+ENIIDLSNANR+EPDLSSDIK+EPDLSSDIKER+FAKLCEEHGILR+LCEEHGILR+TDYDNFLMAHLINEK	1	.

## Sheet: 0.5 cm
IPI	Gene	Description	Molecular Weight	SwissProt Accession	Protein Prophet Score	Total Peptides	Peptide Sequence(s)	# Indistinguishable IPIs	Indistinguishable IPIs
IPI00107952	Lyz2	lysozyme c-2.	18313	P08905,	1	120	AVNACGINCSALLQDDITAAIQCAK+DLSQYIR+GDQSTDYGIFQINSR+NGMAGYYGVSLADWVCLAQHESNYNTR+YWCNDGK	1	.
IPI00107975	Whsc1	isoform 2 of probable histone-lysine n-methyltransferase nsd2.	152381	Q8BVE8-2,	0.93	2	AIEAASSLK+CGDGGQLVLCDRK+FTCTECASGIHSCFVCK+IIDAGPKGNYSR+RQSEDECFRCGDGGQLVLCDR	3	IPI00671804;IPI00762411;
IPI00108003	Csf1r	macrophage colony-stimulating factor 1 receptor.	109179	P09581,	1	67	CTELEDPMAGSTTIHLYVK+DPAHSWNLLAQEVTVVEGQEAVLPCLITDPALK+DSVSLMR+KLEFITQR+LEIPLNSDFQDNYYK+VHPEPPQIK+VIIQSQLPIGTLK+VLDSNTYVCK	2	IPI00875061;
IPI00108084	Was	wiskott-aldrich syndrome protein homolog.	54192	P70315,	1	3	AGISEAQLTDAETSK+GGLPPVPPHPGGDHGGPSGGPLSLGLVTVDIQNPDITSSR+LIYDFIEDQGGLEAVR+MNSGPGPVGGRPGGR	2	IPI00850354;
IPI00108085	Tial1	nucleolysin tiar.	43389	P70318,	1	7	FEDVVNQSSPK+LDAENAIVHMGGQWLGGR+MMEDDGQPR+QTFSPFGQIMEIR	2	IPI00856773;
IPI00108125	Eif5a	eukaryotic translation initiation factor 5a-1.	16832	P63242,	1	76	KYEDICPSTHNMDVPNIK+LPEGDLGK+NDFQLIGIQDGYLSLLQDSGEVR+VHLVGIDIFTGK+YDCGEEILITVLSAMTEEAAVAIK+YEDICPSTHNMDVPNIK	1	.
IPI00108143	Hnrnph2	heterogeneous nuclear ribonucleoprotein h2.	49280	P70333,	1	218	ATENDIYNFFSPLNPMR+EGRPSGEAFVELESEDEVK+GAYGGGYGGYDDYGGYNDGYGFGSDR+HTGPNSPDTANDGFVR+MMLSTEGR+SNSVEMDWVLK+STGEAFVQFASQEIAEK+VHIEIGPDGR+VTGEADVEFATHEDAVAAMAK	1	.
IPI00108189	Hint1	histidine triad nucleotide-binding protein 1.	13777	P70349,	1	40	AQVAQPGGDTIFGK+CLAFHDISPQAPTHFLVIPK+HISQISVADDDDESLLGHLMIVGK+IIFEDDR+KHISQISVADDDDESLLGHLMIVGK+MVVNEGADGGQSVYHIHLHVLGGR	1	.
IPI00108204	Nfyc	nuclear transcription factor y subunit gamma.	37254	P70353,	1	17	AAQIFITELTLR+FDQFDFLIDIVPR+MISAEAPVLFAK+VQELPLAR	1	.
IPI00108260	Pnpla5	isoform 2 of patatin-like phospholipase domain-containing protein 5.	48424	Q32LZ8-2,	0.83	2	GTAPSGNRPLNHR+LYENLPDNCHILASQR+RDFWTR	2	IPI00850481;
IPI00108338	Mcm3	dna replication licensing factor mcm3.	91546	P25206,	0.98	5	EEPFSSEEIQACLSR+KAILCLLLGGVER+TLTSCFLSCVVCVEGIVTK+TVDLQDAEEAVELVQYAYFK	1	.
IPI00108378	Lrguk	leucine-rich repeats and guanylate kinase domain-containing protein.	93190	Q9D5S7,	0.93	5	IEDLSCVSCMPYLLELNASQNK+LSAITIMDPGSNTKPTLPPIPHGRR+VLSLSNNMIETITGLEELK	1	.
IPI00108388	Usp9x	probable ubiquitin carboxyl-terminal hydrolase faf-x.	290545	P70398,	0.92	6	CLAENAVYLCDR+ELDMEPYTVAGVAK+IELFVGGELIDPGDDRK+KLIGQLNLK+NNFLPNADMETRR+RGAYLNALKIAK+SGGLPLVLSMLTR+WVVPVLPK	2	IPI00798468;
IPI00108535	Ceacam1	isoform long of carcinoembryonic antigen-related cell adhesionmolecule 1.	57016	P31809-1,	0.98	7	DMGVYTLDMTDENYR+EIIYSNGSLLFQMITMK+MTLSQNNSILR	7	IPI00227804;IPI00654907;IPI00658311;IPI00719884;IPI00720077;IPI00896737;
IPI00108762	.	similar to smt3b protein isoform 3.	10744	.	0.97	4	VAGQDGSVVQFK	14	IPI00122955;IPI00129580;IPI00165706;IPI00379383;IPI00652964;IPI00751963;IPI00761765;IPI00848631;IPI00848890;IPI00849486;IPI00849725;IPI00880594;IPI00881242;
IPI00108895	Psmc4	26s protease regulatory subunit 6b.	47281	P54775,	1	22	AVAHHTTAAFIR+EAVELPLTHFELYK+EFLHAQEEVKR+ELLKPNASVALHK+ENAPAIIFIDEIDAIATK+ILLELLNQMDGFDQNVNVK+LQQELEFLEVQEEYIKDEQK+MNLSEEVDLEDYVARPDK+QIGIDPPR	2	IPI00828513;
IPI00109044	2900073G15Rik	myosin light chain, regulatory b-like.	19895	.	0.98	1	ATSNVFAMFDQSQIQEFK+DGFIDKEDLHDMLASMGK+EAFNMIDQNR+ELLTTMGDR+FTDEEVDELYR+LNGTDPEDVIR+NAFACFDEEAIGTIQEDYLR	2	IPI00750441;
IPI00109061	Tubb2b	tubulin beta-2b chain.	49953	Q9CWF2,	1	26	AILVDLEPGTMDSVR+EIVHIQAGQCGNQIGAK+EVDEQMLNVQNK+FWEVISDEHGIDPTGSYHGDSDLQLER+GHYTEGAELVDSVLDVVR+IMNTFSVMPSPK+INVYYNEATGNK+ISEQFTAMFR+LHFFMPGFAPLTSR+MSATFIGNSTAIQELFK+NMMAACDPR+NSSYFVEWIPNNVK+SGPFGQIFRPDNFVFGQSGAGNNWAK	1	.
IPI00109065	Gabra4	gamma-aminobutyric acid receptor subunit alpha-4.	60878	Q9D6F4,	0.89	2	KISKPPPEVPAAPVLK+LTISAECPMR+LVDFPMDGHACPLK	2	IPI00874979;
IPI00109073	Tubb4	tubulin beta-4 chain.	49586	Q9D6F9,	1	62	ALTVPELTQQMFDAK+AVLVDLEPGTMDSVR+FWEVISDEHGIDPTGTYHGDSDLQLER+ISEQFTAMFR+LHFFMPGFAPLTSR+MAATFIGNSTAIQELFK+NMMAACDPR+NSSYFVEWIPNNVK+SGPFGQIFRPDNFVFGQSGAGNNWAK	1	.
IPI00109074	Asah3l	putative uncharacterized protein.	14983	.	0.88	21	QVEELKK	8	IPI00131692;IPI00310248;IPI00416396;IPI00416397;IPI00467555;IPI00515754;IPI00845537;
IPI00109109	Sod2	superoxide dismutase [mn], mitochondrial.	24603	P09671,	1	4	AIWNVINWENVTER+HHAAYVNNLNATEEK+NVRPDYLK	1	.
IPI00109131	AU022252	uncharacterized protein c1orf50 homolog.	21863	Q5EBG8,	1	3	DADLHHAACNMVK+EAAGPGGALVELTPTPGGLALVSPYHTHR+LTVIAEQIQHLQEQAR+VGDPLDLVALAEQVQK	1	.
IPI00109142	Esd	s-formylglutathione hydrolase.	31320	Q9R0P3,	1	22	AFSGYLGPDESK+CPALYWLSGLTCTEQNFISK+DDEFLSNGQLLPDNFIAACTEK+FAVYLPPQAESGK+LQEGYDHSYYFIATFIADHIR+MYSYVTEELPQLINANFPVDPQR+SGYQQAASEHGLVVIAPDTSPR+SVSAFAPICNPVLCSWGK+VFEHSSVELK	1	.
IPI00109311	Slc9a3r1	isoform 1 of ezrin-radixin-moesin-binding phosphoprotein 50.	38600	P70441-1,	1	19	AVDPDSPAEASGLR+EALVEPASESPRPALAR+GPNGYGFHLHGEK+IVEVNGVCMEGK+KGPNGYGFNLHSDK+LLVVDKETDEFFK+LLVVDPETDER+LVEPGSPAEK+LVEVNGENVEK+SASSDTSEELNSQDSPK+SEQAEPPAAADTHEAGDQNEAEK+VIPSQEHLDGPLPEPFSNGEIQK	1	.
IPI00109324	Retnla	resistin like alpha.	15061	Q9EP95,	0.98	13	ELLANPANYPSTVTK	1	.
IPI00109437	Pir	pirin.	32066	Q9D711,	0.88	1	KVTLSVLSR	2	IPI00831563;
IPI00109482	Ddah1	n(g),n(g)-dimethylarginine dimethylaminohydrolase 1.	31381	Q9CWS0,	1	5	DYAVSTVPVADSLHLK+LKDHLLIPVSNSEMEK+SFCSMAGPNLIAIGSSESAQK	2	IPI00880463;
IPI00109501	Mrrf	ribosome-recycling factor, mitochondrial.	29051	Q9D6S7,	0.88	8	ESGMNLNPEVEGTLIR+QISQMADDTVAELDQHLAAK+TNAMNKLK	1	.
IPI00109588	Col4a1	collagen alpha-1(iv) chain.	160679	P02463,	1	10	GDAGEPGLPGTK+GDHGLPGSSGPR+GDIGPPGPPGVGPIGPVGEK+GDPGPPGVQGPAGPPGVPGIGPPGAMGPPGGQGPPGSSGPPGIK+GEMGVMGTPGQPGSPGPAGTPGLPGEK+GEQGFMGPPGPQGQPGLPGTPGHPVEGPK+GEVGFPGLAGSPGIPGVK+GFPGIPGMPGSPGLPGLQGPVGPPGFTGPPGPPGPPGPPGEK+GPLGPPGLPGFSGNPGPPGLPGMK+GSPGIPGDSGYPGLPGR+GSPGNIGHPGSPGLPGEKGDK+GSQGLPGLTGQSGLPGLPGQQGTPGVPGFPGSK+KFSTMPFLFCNINNVCNFASR	1	.
IPI00109612	Lamb2	laminin, beta 2.	196579	.	0.99	2	ANASTFAVPSPVSNSADTRR+CQLCECSGNIDPMDPDACDPHTGQCLR+EGQEVEFLVTSLPR+GTVPGSSPCDSSSGTCFCK+LGLLLSVLAATLAQAPSLDVPGCSR+LSAHAHTLSLTGINELVCGAPGDAPCATSPCGGAGCR+QLDQHLEILK+RAGNSLAASTAEETAGSAQSR+YFSYDCGADFPGIPLAPPRR	2	IPI00119065;
IPI00109656	Arfgap2	isoform 2 of adp-ribosylation factor gtpase-activating protein 2.	58110	Q99K28-2,	1	4	EQQAADAK+KQAEESMVASMR+QHGCMANDANTK+SQLDLFDDVGTFASGPPK+SSISHSVLSEMQMIEQETPLSAK+TEIQTIFK	2	IPI00120571;
IPI00109657	Paip2	polyadenylate-binding protein-interacting protein 2.	14700	Q9D6V8,	1	3	CFQEMLEEEEEHEWFIPAR+QIEEELWEEEFIER	1	.
IPI00109667	Nmnat1	nicotinamide mononucleotide adenylyltransferase 1.	32355	Q9EPA7,	0.98	17	HELYNTESEGR+QDSSPQKPQEPKPTGVPK+YLVPDLVQEYIEK	1	.
IPI00109709	Pycard	apoptosis-associated speck-like protein containing a card.	21459	Q9EPB4,	1	3	DAILDALENLSGDELK+DAILDALENLSGDELKK+EESGAVAAAASVPAQSTAR	1	.
IPI00109803	Setd6	set domain-containing protein 6.	52960	Q9CWY3,	1	15	ESVRAGELLFAVPRSALLSPHTCSISGLLER+QGTVAGYGMVAR+SALLSPHTCSISGLLER	1	.
IPI00109813	Hnrnpa0	12 days embryo head cdna, riken full-length enriched library,clone:3010025e17 product:heterogeneous nuclear ribonucleoprotein a0(hnrnp a0) homolog.	30530	.	1	45	CFGFVTYSNVEEADAAMAASPHAVDGNTVELK+LFIGGLNVQTSESGLR+SGGGGGGGGSWGGR	1	.
IPI00109823	Gbe1	1,4-alpha-glucan-branching enzyme.	80364	Q9D6Y9,	0.99	6	CGWLSAPQAYVSEK+IVLDSDAAEYGGHQR+SPLIPHGSK	1	.
IPI00109860	Rbm8a	isoform 2 of rna-binding protein 8a.	19760	Q9CWZ3-2,	1	18	EAQAAMEGLNGQDLMGQPISVDWCFVR+FAEYGEIK+GYTLVEYETYK+MADVLDLHEAGGEDFAMDEDGDESIHK+MREDYDSVEQDGDEPGPQR+NIHLNLDR+SVEGWILFVTGVHEEATEEDIHDK	2	IPI00410937;
IPI00109946	Cd48	cd48 antigen.	27383	P18181,	1	4	DQHVDYTWYESSGPFPK+KSPGYVLDLIVTPQNK+VYLEENNGALHISNVR	1	.
IPI00109966	B2m	beta-2-microglobulin.	13823	P01887,	1	197	DWSFYILAHTEFTPTETDTYACR+HDSMAEPK+HPPENGKPNILNCYVTQFHPPHIEIQMLK+TPQIQVYSR+TVYWDRDM+VEMSDMSFSK+VKHDSMAEPK	1	.
IPI00110208	2310011J03Rik	upf0449 protein c19orf25 homolog.	12112	Q9D7E4,	0.98	1	AEDSEIQQEQIYQQSR	1	.
IPI00110350	Armet	protein armet.	20374	Q9CXI5,	1	2	IINEVSKPLAHHIPVEK	3	IPI00404019;IPI00775791;
IPI00110468	Papln	papilin.	138904	.	1	52	AEGFPVPTIEWQR+AEQCAEFDGTDFQGR+AEQCAEFDGTDFQGRRYR+CLLPSAQGSCGDWAAR+CLQCGGDGSSCYPVTGTFDGNDLSR+CVDLQSSKPAEMEACNR+DAVVDGTPCEPGQR+DEGSYTCSAFR+DQPTLTEPCVQEACPVFR+EQEPAPGEPPHIPAYGNRPGGQEIRPR+FGCCYDNVASAAGPLGEGCVGQPSYAYPVR+FWYGGCHGNANNFASEQECMNTCR+GDEGSPVHAAACLLK+GFSWSHGSWGDCSAECGGGHQSR+GPGGQQEPDWHR+GPTSEPLVIELLSQESNPGVHYEYYLPANDPGR+GYNQIFIIPAGATSIR+HKDAVVDGTPCEPGQR+HQVQPDGSLVISR+HSPHGCCPDGHTPSLGPQWQGCPL…	2	IPI00880383;
IPI00110476	Zfp40	zinc finger protein 40.	93595	.	0.93	3	CFRTYSSLYRHR+CHTGEKPYK+EYLNLCSIIGSYTQMDTR+IHQRIHTGEKPYKCSECHK+KPTLELIK+MCSGEKPYQCRK+RMCSGEKPYQCRK	2	IPI00881808;
IPI00110528	3110049J23Rik	phenazine biosynthesis-like domain-containing protein 2.	31983	Q9CXN7,	1	7	AAIGDTLVQDIR+EMNLSETAFVR+GGELDINLRPDGR+GNPAAVCLLER+KLQPTDDFTQSSR+LPIFIADAFTATAFR+LQPTDDFTQSSR+REEDGIVLDFPVYPTFPQDFHEVEDLIK+TLDEDAHQDIAR+VNTEPLPAIEK	1	.
IPI00110588	Msn	moesin.	67767	P26041,	0.99	2	ELAEKEKEK+ILALCMGNHELYMR+KPDTIEVQQMK+KVTAQDVR+QEAEEAKEALLQASR+TAMSTPHVAEPAENEHDEQDENGAEASAELR	1	.
IPI00110612	Chit1	isoform 2 of chitotriosidase-1.	43413	Q9D7Q1-2,	1	5	FTDMVATASNR+GLVDAGYEVDK+SFTLASSSDNGVGAPATGPGAPGPYTK+TQGFDGLDLDWEFPGGR	2	IPI00623675;
IPI00110616	Eraf	alpha-hemoglobin-stabilizing protein.	11832	Q9CY02,	1	18	AMTEFQQELSTLGSQFLAK+KLVHGEQEEQDR+LVHGEQEEQDR+SKEPPSNTLPSS	1	.
IPI00110672	Mrps28	28s ribosomal protein s28, mitochondrial.	20520	Q9CY16,	0.83	1	IFHIVEDDLYIDFGGK	1	.
IPI00110679	Snx7	sorting nexin-7.	45000	Q9CY18,	0.97	26	ADIDLLTEEIGK+EYGPIHILWSASEEELVDTLK+LEEAHPTLIIPPLPEK	1	.
IPI00110684	Ppa1	inorganic pyrophosphatase.	32667	Q9D819,	1	81	DVFHMVVEVPR+GISCMNTTVSESPFK+GQYISPFHDVPIYADK+GQYISPFHDVPIYADKDVFHMVVEVPR+GYIWNYGAIPQTWEDPGHSDK+HTGCCGDNDPIDVCEIGSK+LKPGYLEATVDWFR+NKDFAVDIIK+VIAINVDDPDAANYK+VIAINVDDPDAANYKDISDVER+VLGILAMIDEGETDWK+VPDGKPENEFAFNAEFK+YKVPDGKPENEFAFNAEFK+YVANLFPYK	1	.
IPI00110705	2010316F05Rik	isoform 1 of upf0566 protein.	18862	Q9D820-1,	1	4	FVLDSAFLEGGHEK+VGQGCATPLSLFCDDGDVK+VYFHPMTNAATMGLSPEDFLIFVK	2	IPI00650054;
IPI00110716	Fip1l1	isoform 1 of pre-mrna 3'-end-processing factor fip1.	64959	Q9D824-1,	1	52	AEFTSPPSLFK+DHSPTPSVFNSDEER+GVDLDAPGSINGVPLLEVDLDSFEDKPWR+KPGADLSDYFNYGFNEDTWK+LPGAIDVIGQTITISR+MGLEVIPVTSTTNK+RLPGAIDVIGQTITISR+TGAPQYGSYGTAPVNLNIK	6	IPI00119501;IPI00667065;IPI00880541;IPI00881462;IPI00882266;
IPI00110721	Glod4	isoform 1 of glyoxalase domain-containing protein 4.	33317	Q9CPV4-1,	0.97	1	ELPDLEDLMKR+VAEGIFETEAPGGYK	3	IPI00112630;IPI00831130;
IPI00110724	Rpl22l1	isoform 1 of 60s ribosomal protein l22-like 1.	14467	Q9D7S7-1,	0.98	3	TGNLGNVVHIER	2	IPI00762362;
IPI00110766	Ube2f	nedd8-conjugating enzyme ube2f.	21110	Q9CY34,	0.97	1	DVVWGLNSLFTDLLNFDDPLNIEAAEHHLR+EHSIDGTGWAPTR	1	.
IPI00110843	Agmat	agmatinase, mitochondrial.	38255	A2AS89,	0.98	3	EESLMLGAVNPSTGALPFQSLR+EHGPVGLVHVGAHTNTTDKPR+RSVDEGLLDSK	1	.
IPI00110852	Ssr1	translocon-associated protein alpha, muscle specific isoform.	33720	.	1	5	DLNGNVFQDAVFNQTVTVIER+EEEDVSSEPEASPSADTTILFVK+FLVGFTNK+GEDFPANNIVK+GTEDFIVESLDASFR	3	IPI00672270;IPI00755329;
IPI00110918	Mrps22	28s ribosomal protein s22, mitochondrial.	41192	Q9CXW2,	1	8	DLVDDATSLVQLYHMLHPDGQSAQEAK+EQAAEGVDLIK+HADVLNLCVAQFEPDSAEYIK+KIDGLLIDQIQR+LLSSEAESGSSEVK+LMTQAQLEEATR+RVLPPVIFK	1	.
IPI00110990	Dusp3	dual specificity protein phosphatase 3.	20472	Q9D7X3,	0.86	2	VYVGNASVAQDITQLQK	2	IPI00648654;
IPI00111013	Ctsd	cathepsin d.	44954	P18242,	1	49	AIGAVPLIQGEYMIPCEK+AYWQVHMDQLEVGNELTLCK+DPEGQPGGELMLGGTDSK+FDGILGMGYPHISVNNVLPVFDNLMQQK+GGCEAIVDTGTSLLVGPVEEVK+GGCEAIVDTGTSLLVGPVEEVKELQK+TMTEVGGSVEDLILK+TTEPVSELLK	2	IPI00404551;
IPI00111020	Prcc	putative uncharacterized protein.	52302	.	1	2	GDDQLSGAQQWMTK+GREEINFVEIK	2	IPI00808201;
IPI00111117	Arpc5l	actin-related protein 2/3 complex subunit 5-like protein.	16980	Q9D898,	0.99	1	ALAVGGLGSIIR+ALAVGGLGSIIRVLTARK+GFEKPTENSSAVLLQWHEK	1	.
IPI00111210	Ppbp	putative uncharacterized protein.	12252	.	1	26	CTNTISGIPFNSISLVNVYRPGVHCADVEVIATLK+SDGMDPYIELR+TCLDPNAPGVK+TCLDPNAPGVKR	1	.
IPI00111218	Aldh2	aldehyde dehydrogenase, mitochondrial.	56538	P47738,	1	95	AAFQLGSPWR+EAGFPPGVVNIVPGFGPTAGAAIASHEGVDK+EEIFGPVMQILK+ELGEYGLQAYTEVK+GYFIQPTVFGDVK+GYFIQPTVFGDVKDGMTIAK+KTFPTVNPSTGEVICQVAEGNKEDVDK+LADLIER+LGPALATGNVVVMK+RMDASDRGR+TEQGPQVDETQFK+TFVQENVYDEFVER+TIPIDGDFFSYTR+VAEQTPLTALYVANLIK+VAFTGSTEVGHLIQVAAGSSNLK+VTLELGGK+VVGNPFDSR+YGLAAAVFTK+YYAGWADK	1	.
IPI00111315	Apoa2	apolipoprotein a-ii.	11319	P09813,	1	1715	AKTSEIQSQVK+AYFEKTHEQLTPLVR+DLVEKAKTSEIQSQVK+QADGPDMQSLFTQYFQSMTEYGK+QADGPDMQSLFTQYFQSMTEYGKDLVEK+SAGTSLVNFFSSLMNLEEKPAPAAK+THEQLTPLVR+TSEIQSQVK+TSEIQSQVKAYFEK+TSEIQSQVKAYFEKTHEQLTPLVR	1	.
IPI00111353	Med11	mediator of rna polymerase ii transcription subunit 11.	13131	Q9D8C6,	0.99	2	KDCQMALKR+YLTQVATGQPHEGSSYSSR	1	.
IPI00111359	Gsr	isoform mitochondrial of glutathione reductase, mitochondrial.	53663	P47791-1,	1	35	ADFDNTVAIHPTSSEELVTLR+ALLTPVAIAAGR+FSWHVIK+GHILVDEFQNTNVK+IYSTAFTPMYHAVTTR+LDYDNIPTVVFSHPPIGTVGLTEDEAVHK+LGGTCVNVGCVPK+LNTIYQNNLTK+NFDSLISSNCTEELENAGVEVLK+SHIEIIHGYATFADGPRPTVEVNGK+SVIVGAGYIAVEIAGILSALGSK+TSSGLELQVVTSVPGR	2	IPI00760002;
IPI00111412	Rpl4	60s ribosomal protein l4.	47154	Q9D8E6,	0.99	4	IEEVPELPLVVEDK+LDELYGTWR	1	.
IPI00111560	Set	isoform 1 of protein set.	33378	Q9EQU5-1,	1	43	EFHLNESGDPSSK+EQQEAIEHIDEVQNEIDR+EQQEAIEHIDEVQNEIDRLNEQASEEILK+IDFYFDENPYFENK+IPNFWVTTFVNHPQVSALLGEEDEEALHYLTR+LNEQASEEILK+VEVTEFEDIK	5	IPI00347814;IPI00410883;IPI00755843;IPI00850678;
IPI00111589	Cbx1	8 days embryo whole body cdna, riken full-length enriched library,clone:5730433g16 product:chromobox homolog 1 (drosophila hp1 beta),full insert sequence.	17196	.	1	5	GFSDEDNTWEPEENLDCPDLIAEFLQSQK+IIGATDSSGELMFLMK+KVEEVLEEEEEEYVVEK+VEEVLEEEEEEYVVEK	3	IPI00129466;IPI00649286;
IPI00111663	Ghrl	isoform 1 of appetite-regulating hormone.	13207	Q9EQX0-1,	0.81	5	FLQDILWEEVK	3	IPI00230764;IPI00408503;
IPI00111702	Ern1	isoform 1 of serine/threonine-protein kinase/endoribonuclease ire1.	110185	Q9EQY0-1,	1	7	GSTLPLLEGPQTDGVTIGDK+LTPTLYVGK+MIAMDPQQRPSAK+QANILLGACNLDCFHSDK+RSGVPGTEGWIAPEMLSEDCK	1	.
IPI00111749	Rims2	isoform 1 of regulating synaptic membrane exocytosis protein 2.	172863	Q9EQZ7-1,	1	14	HQIASDMPSDRK+HRVMDDHYSSDR+IHAEVSR+KIILAVMDR+MLEITLWDQAR+QQEILTK+QTLATPAMGDIQVGMMDK+QTLATPAMGDIQVGMMDKK+QVSLSSSEEELASTPEYTSCDDVELESESVSEK+SFMGVAQILLDELELSNMVIGWFK+SRSASQLSQTEGGGK+SWSPSAPPPQR	3	IPI00460714;IPI00462051;
IPI00111770	Atp5k	atp synthase subunit e, mitochondrial.	8236	Q06185,	0.87	1	ELAEAQDDSILK+RYSYLKPR	1	.
IPI00111794	Siae	isoform 1 of sialate o-acetylesterase.	60775	P70665-1,	0.97	2	ELSDTAAYQSVR+FASYIDNYMVLQK+NECNSEESSCPFR	2	IPI00459781;
IPI00111807	F8	coagulation factor viii.	266150	Q06194,	1	14	DLNSGLIGALLVCK+DMWKSKEK+EFLISSSQDGHHWTQILYNGK+IEPQFEEIAEMLK+MLFLSESSNWFK+NQASRPYNIYPHGITDVSPLHARR+NQASRPYSFYSSLISYK+SFFQNTNHPNTR+SLPGLIGCHR+TDSSGFPDMPVHSSSK+VNSEIQEVTALIHDGTLLGK+VTVEQDGFTK	1	.
IPI00111821	3930401K13Rik	nuclear protein np60.	59716	Q922P9,	1	9	DLTIPESSTVKGMMAGPMAAFK+DLVLGPSGVLQGIRPGK+FFGTEDHAWIK+FQQAVDAVEEFLR+IGFLGLGLMGSGIVSNLLK+LAIALGDAVNHPTPMAAAANEVYKR	2	IPI00817029;
IPI00111829	Ebna1bp2	probable rrna-processing protein ebp2.	34703	Q9D903,	0.98	5	RPTDYFAEMAK	2	IPI00649823;
IPI00111831	Naca	nascent polypeptide-associated complex subunit alpha, muscle-specificform.	220601	P70670,	1	107	CPDPSSKK+DIELVMSQANVSR+EAPATPSVGVIAVSGEISPSPKK+ENLAAPAVLPVSSK+ESSATSSSKR+ETPQNATPNESLAASSQK+ETPVTPAVPPVK+GAPVPSTGAPPSPK+IEDLSQQAQLAAAEK+NILFVITKPDVYK+NNSNDIVNAIMELTM+QFPAPPASATLGVPVSPLPATEGLK+QVPAEILPSPQK+SPASDTYIVFGEAK+SVPAVTSLSPPKAPVAPSNEATIVPTEIPTSLK+SVTDPAMAPR+TAAPEETSTTPSPQK+TAAPKETPATSSEGVTAVPSEISPSPPTPASK+VDAVSHMESSGSSR+VLMSSPPKK	1	.
IPI00111876	Abhd14b	abhydrolase domain-containing protein 14b.	22451	Q8VCR7,	1	25	AVAIDLPGLGR+FSSETWQNLGTLQR+FSVLLLHGIR+GFVPVAPICTDK+GLLDFLQGLA+TPALIVYGDQDPMGSSSFQHLK+VLVMEGAGHPCYLDKPDEWHK	1	.
IPI00111908	Cps1	carbamoyl-phosphate synthase [ammonia], mitochondrial.	164618	Q8C196,	1	16	DGSIDLVINLPNNNTK+EPLFGISTGNIITGLAAGAK+FLGVAEQLHNEGFK+GQNQPVLNITNR+HLGIVGECNIQFALHPTSMEYCIIEVNAR+IAPSFAVESMEDALK+QADAVYFLPITPQFVTEVIK+QNLIAEVSTKDVK+RTSVNVVR+SIFSAVLDELK+SVGEVMAIGR+TLGVDFIDVATK+VISHAISEHVEDAGVHSGDATLMLPTQTISQGAIEK+VSQEHPVVLTK	1	.
IPI00111946	1810009N02Rik	10 day old male pancreas cdna, riken full-length enriched library,clone:1810009n02 product:hypothetical maf-like protein containingprotein, full insert sequence.	25066	.	0.98	2	KEILGLTGVALEVVPPR+TGSEEVTSQTTGIDSK+VVLASASPRR	1	.
IPI00111950	Akr1c6	estradiol 17 beta-dehydrogenase 5.	37048	P70694,	1	7	HIDSASMYQNEK+IKENMQVFEFQLTSEDMK+LSDGHFIPILGFGTYAPQEVPK+QLEKILKKPGLK+QWVDQSSPVLLDNPVLGSMAK+SIGVSNFNRRQLEK+YKPVCNQVECHPYLNQGK	1	.
IPI00112032	0710008K08Rik	isoform 1 of uncharacterized protein flj10769 homolog.	36717	Q9CZ42-1,	1	6	LSQALGNITVVQK+RCGGQGDLLSGSLGVMVHWALR+SYSPELIVHPVLDSSNAVEEVEK	3	IPI00894581;IPI00895023;
IPI00112138	1810034K20Rik	magnesium-dependent phosphatase 1.	18582	Q9D967,	1	6	DGMSLQTLTQGLETFAK+GQNIQLYPEVPEVLGR+LAVFDLDYTLWPFWVDTHVDPPFHK+LQSLGVPVAAASR+TSEIQGANQLLELFDLGK	1	.
IPI00112221	1700125F08Rik	adult male testis cdna, riken full-length enriched library,clone:1700125f08 product:inferred: riken cdna 1700125f08 gene /putative.	13810	.	0.87	1	MGPSSCHSR	1	.
IPI00112223	Efhd2	ef-hand domain-containing protein d2.	26791	Q9D8Y0,	1	3	ADLNQGIGEPQSPSR+RADLNQGIGEPQSPSR	2	IPI00226872;
IPI00112243	Slmo2	protein slowmo homolog 2.	21492	Q9CYY7,	0.98	3	GVSLSSYLEGLMASTISSNASK+TYVQEHSVVDPVTR+YPNPMNPSVVGVDVLDR	1	.
IPI00112339	Lima1	lim domain and actin binding 1 isoform a.	84060	Q9ERG0-2,	1	3	CSYCNNK+ELSVEEQIK+VGVLAASMEAK	3	IPI00759925;IPI00874516;
IPI00112446	Scg3	secretogranin-3.	53326	P47867,	1	7	EDDFEELQYFPNFYALLTSIDSEK+FQDDPDGLHQLDGTPLTAEDIVHK+GILDKEEANAIK+LLNLGLITESQAHTLEDEVAEALQK	1	.
IPI00112448	Rps10	40s ribosomal protein s10.	18916	P63325,	1	46	AEAGAGSATEFQFR+DYLHLPPEIVPATLR+HFYWYLTNEGIQYLR+IAIYELLFK+KAEAGAGSATEFQFR+NVPNLHVMK	1	.
IPI00112473	Parp1	isoform long of poly [adp-ribose] polymerase 1.	113100	P11103-1,	1	2	GGAAVDPDSGLEHSAHVLEK+YKPFRQLHNR	3	IPI00139168;IPI00759945;
IPI00112487	Igfbp4	insulin-like growth factor-binding protein 4.	27807	P47879,	1	14	CRPPVGCEELVR+EEPRPVPQGSCQSELHR+EPGCGCCATCALGLGMPCGVYTPR+THEDLFIIPIPNCDR	1	.
IPI00112555	Gars	glycyl-trna synthetase.	81878	Q9CZD3,	1	6	YPLFEGQETGK+YPLFEGQETGKK	1	.
IPI00112641	39706	15 kda selenoprotein.	17760	Q9ERR7,	1	4	LLDDNGNIAEELSILK+WNTDSVEEFLSEK	1	.
IPI00112676	Pdzd11	pdz domain-containing protein 11.	16182	Q9CZG9,	0.98	6	AGLQEGDQVLAVNDVDFQDIEHSK+IPYDDYPVVFLPAYENPPAWIPPHER	1	.
IPI00112719	Alad	delta-aminolevulinic acid dehydratase.	36024	P10518,	1	4	AGCQVVAPSDMMDGR+DEQGSAADSEDSPTIEAVR+DIQEGADMLMVKPGLPYLDMVR+YGVNQLEEMLRPLVEAGLR	1	.
IPI00112813	Utp14a	isoform 2 of u3 small nucleolar rna-associated protein 14 homolog a.	21831	Q640M1-2,	0.98	3	EAEQLVFPLEKEPSSFAPMEHVFR+KTLELPLHK+VSEFNVSSEGSGEK	2	IPI00462762;
IPI00112858	Svep1	isoform 1 of sushi, von willebrand factor type a, egf and pentraxindomain-containing protein 1.	387457	A2AVA0-1,	0.98	9	CAEPPLLENQLVLK+CEAISCSKPNPLWNGSIK+CHTATCQSPCLNGGK+CLPSGQWNGSFPICK+CMEGFVLNTSAKIECLR+CPAPPQVPNGVADGLDYGFK+CSTPIIQQGTINATDLGCGK+ELASEVGVMTISCK+FANHGFK+FSAAFETTLGNMVPSFCNDADDIDCR+GSPCEVPFTPVNGDFICAQDSAGVNCSLSCK+GYTLSGDEESACLASGSWSHSSPVCELVK+GYVCLCPPGYTGLK+MVLCPSPPLIPFGVPASSGALHFGSTVK+QWSGEVAVCR+RCLPNGSWSGSSPSCLPCR+STCEATGQWSKPTPTCHPVSCNEPPK+TVPLSDPK+VDSSSMFCSDCPSLEGSVPHLRPASGNR+VKLRCLEGYVMDSDTDTFTCQ…	1	.
IPI00112904	Mmp2	72 kda type iv collagenase.	74102	P33434,	1	23	DKPTGPLLVATFWPELPEK+FFGLPQTGDLDQNTIETMR+IHDGEADIMINFGR+IIGYTPDLDPETVDDAFAR+KYGFCPETAMSTVGGNSEGAPCVFPFTFLGNK+VWCATTTNYDDDR+VWCATTTNYDDDRK+YGFCPETAMSTVGGNSEGAPCVFPFTFLGNK	1	.
IPI00112949	Trpv4	transient receptor potential cation channel subfamily v member 4.	98027	Q9EPK8,	0.86	6	GLKLTGTYSIMIQKILFK+VCDEDQSNCTVPTYPACR	4	IPI00776125;IPI00776323;IPI00776400;
IPI00112997	Csn2	beta-casein.	25337	P10598,	0.97	2	QMPLLNSETVLR+VNLMGQLQAEDVLQAK	1	.
IPI00113023	Calr3	calreticulin-3.	44198	Q9D9Q6,	0.84	17	FYAISASFKPFSNK	1	.
IPI00113057	Klkb1	plasma kallikrein.	71369	P26262,	1	588	ADTNTIYTNCWVTGWGYTK+ATIPLVPNEECQK+ATIPLVPNEECQKK+CLLFSFLAVTPPK+CQFFIYSLLPQDCK+CQFFIYSLLPQDCKEEGCK+EGGTDACKGDSGGPLVCK+ELIIHQEYK+EQGETQNILQK+ESITGTLPR+GGDLAAIYTPDAQYCQK+HSASGTPTSIK+IKELIIHQEYK+ITYGMQGSSGYSLR+IYGGILSLSEITK+LCTNNFHCQFFTYATSAFYRPEYR+LSTDGSPTR+LVDSPDCTTK+LVSQTHLCGGSIIGR+MCTFHPR+QCGHQISACHR+QWVLTAAHCFDGIPYPDVWR+SADNLVSGFSLK+SGRPSPPIPQENAISGYSLLTCR+TICTFHPNCLFFTFYTNEWETESQR+TRPEPCHSK+VSE…	1	.
IPI00113070	Ercc3	tfiih basal transcription factor complex helicase xpb subunit.	89126	P49135,	0.96	8	RCGTMSSLSGADDTVYMEYHSSR+SLVGVTAACTVR+TQEWGLMILDEVHTIPAR+VQCAEVWCPMSPEFYR	1	.
IPI00113073	Aldh1b1	aldehyde dehydrogenase x, mitochondrial.	57553	Q9CZS1,	1	35	EAGFPPGVVNIITGYGPTAGAAIAQHMDVDK+EEIFGPVQPLFK+KTFPTVNPTTGEVIGHVAEGDR+LAPALATGNTVVMK+TFPTVNPTTGEVIGHVAEGDR+VAEQTPLSALYLASLIK+VAFTGSTEVGHLIQK+VGNPFELDTQQGPQVDKEQFER+VTLELGGK	1	.
IPI00113141	Cs	citrate synthase, mitochondrial.	51737	Q9CZU6,	1	21	ALGFPLERPK+GLVYETSVLDPDEGIR+TVVGQITVDMMYGGMR+VVPGYGHAVLR	2	IPI00118825;
IPI00113146	Ccdc19	adult male testis cdna, riken full-length enriched library,clone:1700028d05 product:nasopharyngeal epithelium specific protein 1,full insert sequence.	65826	.	0.93	30	EHTLAVQVQRDR+YRTKAMNSEVDESLFGGVKPSSQGK	1	.
IPI00113214	Usp5	ubiquitin carboxyl-terminal hydrolase 5.	95833	P56399,	0.98	1	DGPGKYQLFAFISHMGTSTMCGHYVCHIK+IGEWELIQESGVPLKPLFGPGYTGIR+IPPCGWKCSKCDMR+KFTFGLDWVPK+SAAESISESVPVGPK+VCASEKPPK	2	IPI00881918;
IPI00113223	Fasn	fatty acid synthase.	272428	P19096,	1	11	ACVDTALENLSTLKMK+AKTGGTYGEDLGADYNLSQVCDGK+CILLSNLSNTSHAPK+DTSFEQHVLLHTGGK+GETVLIHSGSGGVGQAAISIALSLGCR+KAVAHGDGDTQR+LDPGSPELQQVLKHDLVMNVYR+QAHTMDPQLR+RQGIQVLVSTSNVSSLEGAR+SSCTIIPLMK+VLEALLPLK+YMAQGKHIGKVLVQVR	1	.
IPI00113227	Serpind1	heparin cofactor 2.	54497	P49182,	1	33	DQATTSDNLFIAPVGISTAMGMISLGLR+EALENIDPATQMLILNCIYFK+EFYFAEAQEANFPDPAFISK+FPVEMTHNHNFR+FTVDRPFLFLVYEHR+GETHEEVHSVLHFR+TLEAQLTPQVVER+YEVTTIHNLFR	1	.
IPI00113257	Ube2v1	isoform 1 of ubiquitin-conjugating enzyme e2 variant 1.	16355	Q9CZY3-1,	1	11	GVGDGTVSWGLEDDEDMTLTR+LLEELEEGQK+LPQPPEGQCYSN+VILQELR+VNMSGVSSSNGVVDPR+WTGMIIGPPR+YPEAPPSVR	1	.
IPI00113262	Psmd14	26s proteasome non-atpase regulatory subunit 14.	34577	O35593,	1	6	AGVPMEVMGLMLGEFVDDYTVR+AVAVVVDPIQSVK+MTPEQLAIKNVGK+RHLEEHVDVLMTSNIVQCLAAMLDTVVFK+VIDVFAMPQSGTGVSVEAVDPVFQAK	1	.
IPI00113287	Psmd9	10 days embryo whole body cdna, riken full-length enriched library,clone:2610305b01 product:proteasome (prosome, macropain) 26s subunit,non-atpase, 9, full insert sequence.	27926	.	1	6	AAAVSDIQDLMR+ANYDVLESQK+LASNSPVLPQAFAR+QVEEALHQLHAR	3	IPI00654099;IPI00761650;
IPI00113302	Otof	isoform 1 of otoferlin.	227033	Q9ESF1-1,	1	10	DPMKPSQILTR+GVLEELSCGCHR+ISGEKSFR+KNQSPGPGQGSEAPEKK+MEPSAGRPMDYQVSITVIEAR+NGDKPITFEVTIGNYGNEVDGMSRPLRPRPR+NQSPGPGQGSEAPEKK+QCTMEMATGEVDVPLVSIFK+QHETSGTDLEEKEEMESAEGLKGPMK+RGFGSAGWTVQAK+RLYNANIMDHIADK	3	IPI00223385;IPI00856230;
IPI00113348	Gm944	isoform 1 of protein fam59a.	97267	Q3UFT3-1,	0.86	1	LPVNVTVPSPPPR+MDPAPSLGCSLK+MPCLICMNHR+QWTTITAHSLEEGHYVIGPK	2	IPI00828249;
IPI00113362	Crkl	crk-like protein.	33830	P47941,	1	3	GELLVIIEKPEEQWWSAR+IHYLDTTTLIEPAPR+YPSPPVGSVSAPNLPTAEENLEYVR	1	.
IPI00113377	Rplp1	60s acidic ribosomal protein p1.	11475	P47955,	1	8	AAGVSVEPFWPGLFAK	5	IPI00118632;IPI00134920;IPI00661192;IPI00753932;
IPI00113457	Mbl2	mannose-binding protein c.	25957	P41317,	1	648	AEFDTSEIDSEIAALR+ALCSEFQGSVATPR+DIAYLGITDVR+KYFVSSVK+NAEENSAIQK+NWVLFSLSEK+VEGSFEDLTGNR+VGPTGPPGNPGLK+WNDVPCSDSFLAICEFSD+YTNWNDGEPNNTGDGEDCVVILGNGK	1	.
IPI00113475	Col4a6	collagen, type iv, alpha 6.	164034	.	0.93	7	GDKGEPGIPGLPGPPGATGQTNTIKGLNGRPGSPGSMGR+GEPGIPGLPGPPGATGQTNTIK+GHDGPIGPPGIGLPGPPGPR+GLNGKPGMLGPK+GNQGLPGFSGLSGELGLK+GPSGTPGLPSLTGLPGALGPQGFPGLK+GTSGFPGAPGLPGISGHPGK+GTSGFPGAPGLPGISGHPGKK+LWVGYSLLFVEGQEK+TTFGEAGLPGR	1	.
IPI00113480	Mpo	myeloperoxidase.	81071	P11247,	1	3	RFCGLPQPSTVGELGTVLK+WLPAEYEDGVSMPFGWTPGVNR	2	IPI00895004;
IPI00113517	Ctsb	cathepsin b.	37280	P10605,	1	83	DQGSCGSCWAFGAVEAISDR+EQWSNCPTIGQIR+GENHCGIESEIVAGIPR+HEAGDMMGGHAIR+HFGYTSYSVSNSVK+ILGWGVENGVPYWLAANSWNLDWGDNGFFK+KLCGTVLGGPK+LCGTVLGGPK+NFYNVDISYLK+NGPVEGAFTVFSDFLTYK+SCEAGYSPSYK+SCEAGYSPSYKEDK+VAFGEDIDLPETFDAR	1	.
IPI00113520	Rnf114	ring finger protein 114.	25745	Q9ET26,	1	6	FSYDTFVDYDVDEDDMINQVLQR+NFDQEGLVEHCK+SVVCPICASMPWGDPSYR+YQNYIMEGVK	1	.
IPI00113536	Anp32b	isoform 2 of acidic leucine-rich nuclear phosphoprotein 32 familymember b.	37447	Q9EST5-2,	1	2	DISTLEPLK+ELVLDNCKAMDGK+LAEELPSLTHLNLSGNNLK+LLPQLSYLDGYDR	2	IPI00831258;
IPI00113538	Nfkbiz	isoform 1 of nf-kappa-b inhibitor zeta.	79007	Q9EST8-1,	0.99	12	CLIQMGAAVEAK+GHSQVLQAIQK+RALSYVLAR	3	IPI00555137;IPI00830733;
IPI00113547	Scgb1a1	uteroglobin.	10519	Q06318,	1	8	ILTSPLCK+LVDTLPQETR+RLVDTLPQETR	1	.
IPI00113576	Ddx24	atp-dependent rna helicase ddx24.	96471	Q9ESV0,	0.88	3	ALSFLGFSAPTPIQALTLAPAIR	2	IPI00380228;
IPI00113610	Pi16	protease inhibitor 16.	53650	.	1	182	AESPEAEAESPLSSEALVPVLPAQER+AQVSPPASDMLQMR+EPEAESPKAESPEAEAESPLSSEALVPVLPAQER+GRKPYQEGTPCSQCPLGYSCENSLCEPMR+GRKPYQEGTPCSQCPLGYSCENSLCEPMRNPEK+IGCGSHFCETLQGVEEANIHLLVCNYEPPGNVK+KPYQEGTPCSQCPLGYSCENSLCEPMR+KPYQEGTPCSQCPLGYSCENSLCEPMRNPEK+MSLTESGESVPQIQEEAEPK+QTMVDLHNQYR+TLALQSSWTGAENPEK+WDDELAAFAK	2	IPI00876156;
IPI00113659	Ifi30	interferon gamma inducible protein 30.	27784	.	0.95	1	LGPCLQVYAPEVSPESIMECATGK	1	.
IPI00113686	Gtf2i	isoform 1 of general transcription factor ii-i.	112265	Q9ESZ8-1,	1	36	EDLQLDKPASGVK+FAQALGLTEAVK+GPVTIPYPLFQSHVEDLYVEGLPEGIPFR+ILDSAEFIK+ITINPGCVVVDGMPPGVSFK+KFGEAIGMGFPVK+KITINPGCVVVDGMPPGVSFK+KMVDQLFCK+RPELLTHSTTEVTQPR+SMLSPSGSCGPIK+TEPTEDSGISLEMAAVTVK+TPTQTNGSNVPFKPR+VPFALFESFPEDFYVEGLPEGVPFR+VPYPVFESNPEFLYVEGLPEGIPFR	7	IPI00229535;IPI00229536;IPI00229538;IPI00395163;IPI00761775;IPI00876528;
IPI00113703	Chga	chromogranin-a.	51789	P26339,	1	47	AEDQELESLSAIEAELEK+AGPEEVPTAASSSHFHAGYK+AKQEEKEEEEEEEAVAR+CVLEVISDSLSKPSPMPVSPECLETLQGDER+DDGQSDSQAVDGDGKTEASEALPSEGK+ELEHKQEEEEEEEER+ELQDLALQGAK+GELEHSQQEEDGEEAMVGTPQGLFPQGGK+GLSAQQQAR+QEEKEEEEEEEAVAR+QQQQQQQQQQQEQQHSSFEDELSEVFENQSPDAK+RAEDQELESLSAIEAELEK+TEASEALPSEGK	1	.
IPI00113738	Wars	isoform 1 of tryptophanyl-trna synthetase, cytoplasmic.	54358	P32921-1,	0.98	1	DYTSGAMLTGELK	2	IPI00355382;
IPI00113746	U2af2	splicing factor u2af 65 kda subunit.	53517	P26369,	1	11	AMQAAGQIPATALLPTMTPDGLAVTPTPVPVVGSQMTR+ELLTSFGPLK+LGGLTQAPGNPVLAVQINQDK+RPHDYQPLPGMSENPSVYVPGVVSTVVPDSAHK+SVDETTQAMAFDGIIFQGQSLK	1	.
IPI00113750	Proc	vitamin k-dependent protein c.	51818	P33587,	1	56	CACAPGYELADDHMR+DHWELDLDIKEILVHPNYTRSSSDNDIALLR+FCQQELR+IVNGTLTK+QGDSPWQAILLDSK+STVNFPCGK+VNNGGCLHYCLEESNGR	1	.
IPI00113782	Reg3a	regenerating islet-derived protein 3 alpha.	19539	O09037,	0.96	1	GHCGSLTASSGFLK	1	.
IPI00113797	Napsa	napsin-a.	45544	O09043,	1	11	ILNPLNGWEQLAELSR+TSTSGGNPSFVPLSK	1	.
IPI00113806	Reg3g	regenerating islet-derived protein 3 gamma.	19307	O09049,	1	5	GGWEWSNADVMNYINWETNPSSSSGNHCGTLSR+RPSGHLVSVLSGAEASFLSSMIK+SSGNSGQYVWIGLHDPTLGYEPNR	1	.
IPI00113828	Guca2b	guanylate cyclase activator 2b.	11628	O09051,	1	12	EMSNPQPR+EMSNPQPRR+RSGLLPAVCHNPALPLDLQPVCASQEAASTFK+SGLLPAVCHNPALPLDLQPVCASQEAASTFK+YHGFQVQLESVK	1	.
IPI00113830	Wrn	werner syndrome atp-dependent helicase homolog.	157287	O09053,	0.99	10	DNVVVMATGYGK+EDIISCLNLK+LPEWFAKGNVPSADTGSSSSMAK+LYAATDAYAGLIIYQK+RFPSSAESCESCK+SAVMPSPGTSSSPLEPAISAQELDAR+SISENLCSLRK+VICGPTNTETR+VSSGTNIPKK	2	IPI00890120;
IPI00113845	Psmb1	proteasome subunit beta type-1.	26372	O09061,	1	24	AGGSASAMLQPLLDNQVGFK+DVFISAAER+DVYTGDALR+EGIREETVPLR+FFPYYVYNIIGGLDEEGK+GAVYSFDPVGSYQR+LSEGFSIHTR+NMQNVEHVPLTLDR+TVIGCSGFHGDCLTLTK	1	.
IPI00113848	Dsc1	isoform 1a of desmocollin-1.	98954	P55849-1,	1	7	AETPVGKVNLEECLK+GFSILLSDGQGQEQK+GGHTLESHK+ILEDGTIYTTHDLLLSSEK+QVTLQIGVLNEAQFTNAANAQPPTMCTTTVTVK+VCDCTTPTECR+VSLHVPSHLK	3	IPI00221772;IPI00331132;
IPI00113849	Cdc42	isoform 2 of cell division control protein 42 homolog.	21259	P60766-2,	1	7	NVFDEAILAALEPPEPK+QKPITPETAEK+TPFLLVGTQIDLR	1	.
IPI00113863	Timp2	metalloproteinase inhibitor 2.	24328	P25785,	1	46	CPMIPCYISSPDECLWMDWVTEK+DIEFIYTAPSSAVCGVSLDVGGK+EVDSGNDIYGNPIK+EVDSGNDIYGNPIKR+FFACIK+GAAPPKQEFLDIEDP+GPDKDIEFIYTAPSSAVCGVSLDVGGK+MHITLCDFIVPWDTLSITQK+SDGSCAWYR	2	IPI00649059;
IPI00113870	Pcna	proliferating cell nuclear antigen.	28785	P17918,	1	19	AEDNADTLALVFEAPNQEK+DLSHIGDAVVISCAK+FSASGELGNGNIK+YLNFFTK	3	IPI00848977;IPI00850755;
IPI00113879	Il1rap	isoform 2 of interleukin-1 receptor accessory protein.	41567	Q61730-2,	1	232	CDDWGLDTMR+CPLFEHFLK+DALPPQIYSPNDR+DLEEPINFR+DSCFNSAMR+ITCPNVDGYFPSSVKPSVTWYK+KPDDVTVDITINESVSYSSTEDETR+MYIEHGIHK+NYVCHAR+QDRDLEEPINFR+QIQVFEDEPAR+VAFPLEVVQK+VVYEKEPGEELVIPCK	3	IPI00124823;IPI00653610;
IPI00113895	Actr1a	alpha-centractin.	42614	P61164,	0.85	2	LLSEVKKLAPK+TLFSNIVLSGGSTLFK	2	IPI00153990;
IPI00113996	Blvrb	flavin reductase.	22197	Q923D2,	1	169	CLTTNEYDGHTTYPSHQYD+HDLGHFMLR+IAIFGATGR+ILQESGLK+LPSEGPQPAHVVVGDVR+LQDVTDDHIR+QAADVDKTVAGQEAVIVLLGTGNDLSPTTVMSEGTR+TGLTTLAQAVQAGYEVTVLVR+TGLTTLAQAVQAGYEVTVLVRDSSR+TVAGQEAVIVLLGTGNDLSPTTVMSEGTR+VVACTSAFLLWDPTK+VVACTSAFLLWDPTKVPPR+YVAVMPPHIGDQPLTGAYTVTLDGR	1	.
IPI00114052	Snrpb	small nuclear ribonucleoprotein-associated protein b.	23656	P27048,	0.92	2	MLQHIDYR	2	IPI00128699;
IPI00114065	Cfb	complement factor b (fragment).	85004	P04186,	1	709	AEGIPEFYDYDVALVK+ALFVSEQGK+ALQAVYSMMSWAGDAPPEGWNR+CLTNLIEK+CPRPQDFENGEFWPR+DFHINLFQVLPWLK+DKLKDEDLGFL+DLEIEEVLFHPK+DMEDLENVFYQMIDETK+EDYLDVYVFGVGPLVDSVNINALASK+EQLLPVK+FIQVGVISWGVVDVCR+FLCTGGVDPYADPNTCK+GDSGGPLIVHK+GGSFQLLQGGQALEYLCPSGFYPYPVQTR+HVIIIMTDGLHNMGGNPVTVIQDIR+ISVTRPLK+KAEGIPEFYDYDVALVK+KDNEHHVFK+LEDIVTYHCSR+LKDEDLGFL+LNQISYEDHK+QQLVPSYAR+RDLEIEEVLFHPK+RQQLVPSYAR+SLSLCGMVWEHK+SPFYNLSDQI…	1	.
IPI00114099	Apoc3	apolipoprotein c-iii.	10982	P33622,	1	2147	AEEVEGSLLLGSVQGYMEQASK+FTDKFTGFWDSNPEDQPTPAIES+FTGFWDSNPEDQPTPAIES+GWMDNHFR+TVQDALSSVQESDIAVVAR	2	IPI00885860;
IPI00114162	Fabp5	fatty acid-binding protein, epidermal.	15137	Q05816,	1	40	ELGVGLALR+FDETTADGR+KTETVCTFQDGALVQHQQWDGK+LMESHGFEEYMK+MAAMAKPDCIITCDGNNITVK+MIVECVMNNATCTR+TETVCTFQDGALVQHQQWDGK+TTVFSCNLGEK	1	.
IPI00114206	F2	prothrombin (fragment).	70269	P19221,	1	887	DNLSPPLGQCLTER+DTTEKELLDSYIDGR+DTTEKELLDSYIDGRIVEGWDAEK+EECSVPVCGQEGR+ELLDSYIDGR+ETFMDCLEGR+ETWTTNINEIQPSVLQVVNLPIVERPVCK+GDACEGDSGGPFVMK+GIAPWQVMLFR+ITDNMFCAGFK+IVEGWDAEK+KPVPFSDYIHPVCLPDK+KSPQELLCGASLISDR+LKKPVPFSDYIHPVCLPDK+LVENFCR+LYQGNLAVTTLGSPCLPWNSLPAK+NPDSSTTGPWCYTTDPTVR+QTVTSLLR+REECSVPVCGQEGR+RGDACEGDSGGPFVMK+SGGSKDNLSPPLGQCLTER+SLKDTTEKELLDSYIDGR+SPQELLCGASLISDR+TFGLGEADCGLRPLFEK+TTDAE…	1	.
IPI00114209	Glud1	glutamate dehydrogenase 1, mitochondrial.	61337	P26443,	1	147	ALASLMTYK+CAVVDVPFGGAK+CVGVGESDGSIWNPDGIDPK+DDGSWEVIEGYR+DIVHSGLAYTMER+DSNYHLLMSVQESLER+EMSWIADTYASTIGHYDINAHACVTGKPISQGGIHGR+GASIVEDK+GFIGPGIDVPAPDMSTGER+HGGTIPVVPTAEFQDR+IIAEGANGPTTPEADK+IIAEGANGPTTPEADKIFLER+MVEGFFDR+RDDGSWEVIEGYR+TAAYVNAIEK+VYEGSILEADCDILIPAASEK+VYNEAGVTFT+YNLGLDLR+YSTDVSVDEVK	1	.
IPI00114227	Dennd4a	hypothetical protein loc102442.	210713	.	1	13	MNDVYGPMSQILETLNK+MNDVYGPMSQILETLNKCPHFKR+NLSGGVLMGFMLNR+QGCEIIQSTPYGRPANISGSTSSQR+QSCISASASGLDTSSLSVQGNFDLNNK+SISTCGPLDK+SYLRPITQAPSETATDATSLFALQAFLRSR+YFDLYDPPPDVSCVDLDTNTISQTGDK	1	.
IPI00114252	Ptgds	prostaglandin-h2 d-isomerase.	21066	O09114,	1	8	AQGLTEEDIVFLPQPDK+TQTLKDELK+TVVAPSTEGGLNLTSTFLR	1	.
IPI00114285	Gsto1	glutathione transferase omega-1.	27498	O09131,	1	9	GSAPPGPVPEGQIR+HEVININLK+KLEEGMDNYK+LEEGMDNYK+LFPDDPYKK+LWMAAMQQDPVASSHK+NPLGLVPVLENSQGHLVTESVITCEYLDEAYPEK	1	.
IPI00114319	Sod3	extracellular superoxide dismutase [cu-zn].	27392	O09164,	1	302	EVDAAEMHAICR+GGNQASLQNGNAGR+IDRLDLVEK+LACCVVGTSSSAAWESQTK+REVDAAEMHAICR+RLACCVVGTSSSAAWESQTK+SVVVHAGEDDLGK+VGLTASLAGPHAILGR+VLEIWMELGR+VQPSATLPPDQPQITGLVLFR	1	.
IPI00114330	Hgd	homogentisate 1,2-dioxygenase.	49990	O09173,	1	28	CFYNSDGDFLIVPQK+DFLIPVAWYEDR+FSVDVFEETR+ILPSVSHKPFESIDQGHVTHNWDEVGPDPNQLR+MSLQPNEICVIQR+TCSCLDENYYK+TFRPPYYHR+YISGFGNECASEDPR	1	.
IPI00114349	Esr2	estrogen receptor beta isoform 2.	61204	O08537-1,	0.94	31	CYEVGMVKCGSR+ELVHMIGWAK+RDAHFCAVCSDYASGYHYGVWSCEGCK	5	IPI00230298;IPI00230299;IPI00230300;IPI00410734;
IPI00114350	Angpt1	angiopoietin-1.	57505	O08538,	0.98	2	DAPHVEPDFSSQK+ESATEQYNTNALQR+MTVFLSFAFFAAILTHIGCSNQR+SEMAQIQQNAVQNHTATMLEIGTSLLSQTAEQTR	2	IPI00752668;
IPI00114375	Dpysl2	dihydropyrimidinase-related protein 2.	62278	O08553,	1	3	FQMPDQGMTSADDFFQGTK+GLYDGPVCEVSVTPK+SITIANQTNCPLYVTK	1	.
IPI00114407	Thoc4	isoform 1 of tho complex subunit 4.	26940	O08583-1,	1	5	LLVSNLDFGVSDADIQELFAEFGTLKK+SLGTADVHFER	5	IPI00122339;IPI00311103;IPI00377350;IPI00850366;
IPI00114416	Dci	3,2-trans-enoyl-coa isomerase, mitochondrial.	32078	P42125,	1	8	EADIQNFTSFISK+EAVDGARPFANK+VGVVDEVVPEDQVHSK+VLVETEGPAGVAVMK	1	.
IPI00114457	Tgfb1	transforming growth factor beta-1.	44310	P04202,	1	37	ALDTNYCFSSTEK+EAVPEPPLLSR+GDLGTIHDMNRPFLLLMATPLER+GYHANFCLGPCPYIWSLDTQYSK+LHVEINGISPK+LLTPTDTPEWLSFDVTGVVR+QLYIDFR+QWLNQGDGIQGFR+RGDLGTIHDMNRPFLLLMATPLER+SSVEQHVELYQK+TIDMELVK+VAGESADPEPEPEADYYAK+VLALYNQHNPGASASPCCVPQALEPLPIVYYVGR	1	.
IPI00114560	Rab1	ras-related protein rab-1a.	22678	P62821,	1	14	EFADSLGIPFLETSAK+FADDTYTESYISTIGVDFK+LQIWDTAGQER+MGPGATAGGAEK+RMGPGATAGGAEK	1	.
IPI00114594	Rras	ras-related protein r-ras.	23764	P10833,	1	10	KDGGCPCVLL+LDILDTAGQEEFGAMR+LNVDEAFEQLVR	1	.
IPI00114613	Cdc42bpb	serine/threonine-protein kinase mrck beta.	194781	Q7TT50,	0.98	7	DEEFAVSSVLASDVIHATR+EASHVLEVK+EEEMEVAMQK+ELLEEMQSLR+KFSELVAPGHVQWMAVFK+LELQSALEAEIR+LQESTQTVQSLHGSTR+MNDDGTVQSSVAVGTPDYISPEILQAMEDGMGK+MQELMWPAAPVACSCSPTHVTVYSEYGVDVFDVR+QLEDTVTLR+SFPSPTQCSHCTSLMVGLIR	1	.
IPI00114733	Serpinh1	serpin h1.	46590	P19324,	1	99	AVLSAEKLR+GVVEVTHDLQK+HLAGLGLTEAIDK+HLAGLGLTEAIDKNK+LFYADHPFIFLVR+LSSLIILMPHHVEPLER+LYGPSSVSFADDFVR+TGLYNYYDDEK+TGLYNYYDDEKEK	2	IPI00880252;
IPI00114894	Myh11	isoform 1 of myosin-11.	227028	O08638-1,	0.99	19	ATLQAEQLSNELATER+DVASLGSQLQDTQELLQEETR+ENADLAGELR+HVSTLNIQLSDSKK+IAQLEEELEEEQGNMEAMSDR+ITDVIMAFQAMCR+KLQAQMK+LQDFASTIEVMEEGK+NFMNSPMAQADWVAKK+QQKAETELKELEQK+VEDMAELTCLNEASVLHNLR+VVSSVLQLGNIVFKK	3	IPI00227865;IPI00876408;
IPI00114925	Nans	putative uncharacterized protein.	40024	.	1	7	GSDHSASLEPGELAELVR+HPCFIIAEIGQNHQGDIDVAK+VGSGDTNNFPYLEK+VLVTIEEDDTVMEESVESHSK	1	.
IPI00114958	Kng1	isoform hmw of kininogen-1.	73102	O08677-1,	1	82	ATSQVVAGTK+AYFPCIGCVHAISTDSPDLEPVLK+CPGRPWKPASWEDPNTETTEFSDFDLLDALS+CQALDMTEMAR+DAEEAATGECTATVGK+DAEEAATGECTATVGKR+DAETEQGPTHGHGWLHEK+DIPVDSPELK+DIPVDSPELKEVLGHSIAQLNAENDHPFYYK+EGNCSAQSGLAWQDCDFK+EGNCSAQSGLAWQDCDFKDAEEAATGECTATVGK+ENEFFIVTQTCK+EQEERDAETEQGPTHGHGWLHEK+ERFPSLHGDCVALPNGDDGECR+ESNTELAEDCEIK+ETKCSKESNTELAEDCEIK+EVLGHSIAQLNAENDHPFYYK+FPSLHGDCVALPNGDDGECR+GNLFMDINNK+HGHDHGHWSPR+HGLGHGHQ…	1	.
IPI00114963	Mstn	growth/differentiation factor 8.	42921	O08689,	1	17	ANYCSGECEFVFLQK+DFGLDCDEHSTESR+EQIIYGKIPAMVVDRCGCS+GSAGPCCTPTK+IPAMVVDR+LDMSPGTGIWQSIDVK+MSPINMLYFNGK+YPHTHLVHQANPR+YPLTVDFEAFGWDWIIAPK	1	.
IPI00115062	Cacna1b	isoform nb1 of voltage-dependent n-type calcium channel subunit alpha-1b.	261481	O55017-1,	0.8	6	AEEVMLAEEDK+ARGGGAGGAGGPGQGGLPPGQR+EPHCDLEAIAVTGVGPLHMLPSTCLQK+EPLSQPLAPGSR+GPSLSVDPEGAPSTAAGPGLPHGEGSTACR+HMSPPLGLGKK+LAAETQPAPNASPMK+QNCFTVNR+TFLQALMLLFRSATGEAWHEIMLSCLGNR	4	IPI00466672;IPI00625414;IPI00750241;
IPI00115065	Serpine2	glia-derived nexin.	44207	Q07235,	1	16	FTAVAQTDLK+FTAVAQTDLKEPLK+GMIDNLLSPNLIDGALTR+HNPTGAILFLGQVNKP+MEVPFAVR+SESLHVSHILQK	1	.
IPI00115117	Stoml2	stomatin-like protein 2.	38385	Q99JB2,	1	37	AEQINQAAGEASAVLAK+ASYGVEDPEYAVTQLAQTTMR+ATVLESEGTR+EIVINVPEQSAVTLDNVTLQIDGVLYLR+ESAINVAEGK+ESMQMQVEAER	3	IPI00648577;IPI00649391;
IPI00115157	Snca	isoform 1 of alpha-synuclein.	14485	O55042-1,	1	33	EGVLYVGSK+EGVVHGVTTVAEK+EQVTNVGGAVVTGVTAVAQK+TKEGVVHGVTTVAEK+TKEQVTNVGGAVVTGVTAVAQK+TVEGAGNIAAATGFVK	2	IPI00845803;
IPI00115248	Dnase1l3	deoxyribonuclease gamma.	35760	O55070,	0.85	3	FVWLIGDQEDTTVK+SFGASKKENHEAMDIIVK	1	.
IPI00115362	Rp1h	oxygen-regulated protein 1.	234388	P56716,	1	22	KSFSDPLSTSLLVVENR+KSVIGTVTVVSETEVQEK+LEELEDGK+MITSNDKK+MSSELINVSGRKIIEQER+NDSNVSTFQNVNK+SIVFNQDGTMTVVMK+SPGTLDWSDYGSDSESGYPCK+SQAINAGAIEITSQK	2	IPI00874717;
IPI00115366	Kif15	kinesin-like protein kif15.	160120	Q6P9L6,	0.92	5	AVVNEDTQGNVSQLQAEVKR+KHSGLLQSAQEELTR+KQLELESELQSLQK+LLESQACLQDSYDNLQEVMK+LSLQFEEDK+TFVFDYVAGMDTTQESVFSTVAK	1	.
IPI00115478	Pdgfa	isoform long of platelet-derived growth factor subunit a.	24102	P20033-1,	1	4	LEEHLECACATSNLNPDHR+LLEIDSVGAEDALETSLR+RSIEEAVPAVCK	1	.
IPI00115490	Pcyt1a	choline-phosphate cytidylyltransferase a.	41667	P49586,	0.94	2	EFIGSFLEMFGPEGALK	1	.
IPI00115506	Akap1	isoform 3 of a kinase anchor protein 1, mitochondrial.	92165	O08715-1,	0.89	2	DEDALEPQVK+NSAHHISLAPCPPPVTPQR+VELSLMGDK	8	IPI00230589;IPI00230590;IPI00230591;IPI00230592;IPI00230593;IPI00890007;IPI00894854;
IPI00115510	Inhbe	inhibin beta e chain.	39057	O08717,	1	5	ANNPWPAGSSCCVPTAR+DHYVDFQELGWR+RPLSLLYLDHNGNVVK+TPTCEPETPLCCR	2	IPI00880614;
IPI00115516	Emilin1	emilin-1.	107585	Q99K41,	1	6	ASGPVPVPSGPSEELLR+GSELGGAAGQGGHPPGYTSLASR+RPPQECCPPELGR+SEPGTVPFDR+TCGQICSGAPGEQDSR	1	.
IPI00115552	Polr2j	dna-directed rna polymerase ii subunit rpb11.	13251	O08740,	1	22	DPQVLFAGYK+EDHTLGNIIK+SQLLKDPQVLFAGYK+VPHPLEHK+VQTTPDYSPQEAFTNAITDLISELSLLEER	3	IPI00857046;IPI00895966;
IPI00115607	Hadhb	trifunctional enzyme subunit beta, mitochondrial.	51386	Q99JY0,	1	54	ALAMGYKPK+AMDSDWFAQNYMGR+DGGQYALVAACAAGGQGHAMIVEAYPK+DLMPHDLAR+DQLLLGPTYATPK+EAALGAGFSDK+VPGKDTVTK	2	IPI00474281;
IPI00115645	Dot1l	histone h3 methyltransferase dot1 variant a.	165913	.	0.94	14	HLSQDHTGASK+KSQSTLDLLHSPPPAPPSASPQDAYR+LPVSIPLASVVLPSR+MSAASAER+RIVFSISVGASSK+SFESMQR+SSPTPYQDHDQPPVLRK	1	.
IPI00115651	Ivl	involucrin.	54919	P48997,	0.97	5	LHKPELYLRK+QHQKPPEPELHLGK	6	IPI00461409;IPI00461411;IPI00461412;IPI00662549;IPI00665328;
IPI00115658	Igf1	isoform igf-ia of insulin-like growth factor i.	17093	P05017-1,	1	5	APQTGIVDECCFR+GFYFNKPTGYGSSIR	6	IPI00228152;IPI00875080;IPI00881515;IPI00881859;IPI00895475;
IPI00115660	Tcof1	treacle protein.	135001	O08784,	0.99	6	KASGTTAQSSSSESEDGDEDLIPATQPSTYALR+VLTELLEQER	4	IPI00408190;IPI00653717;IPI00808555;
IPI00115663	Dctn1	isoform 1 of dynactin subunit 1.	141692	O08788-1,	1	12	EQLDMAGAR+ETVGDLEAMNEMNDELQENAR+GAAGEQLSFAAGLVYSLSLLQATLHR+LVLTQEQLHQLHSR+MPGTDAPGIPAALAFGSQVSDTLLDCR+MPGTDAPGIPAALAFGSQVSDTLLDCRK+RMPGTDAPGIPAALAFGSQVSDTLLDCRK+VGSLYPEMSAHER+YMEEMADTADAIEMATLDK	5	IPI00856365;IPI00856500;IPI00857569;IPI00858004;
IPI00115679	Ganab	isoform 2 of neutral alpha-glucosidase ab.	109404	Q8BHN3-2,	1	85	AEKDEPGAWEETFK+AHAHLDTGR+FSFSGSTLVSSSADPK+LDLLEDR+LKVTEGGEPYR+QYASLTGTQALPPLFSLGYHQSR+SIRPGLSPYR+VLLVLELQGLQK+VVIMGAGKPAAVVLQTK	2	IPI00403058;
IPI00115680	Prkcsh	isoform 1 of glucosidase 2 subunit beta.	58793	O08795-1,	1	11	ESLQQLAEVTR+ETVVTSTTEPSR+HGGSPTSLGTWGSWAGPDHDK+KLWEEQQAAAK+LWEEQQAAAK+MPPYDEETQAIIDAAQEAR+YEQGTGCWQGPNR	2	IPI00122353;
IPI00115690	Fcna	ficolin-1.	36298	O70165,	1	186	ELGDTLCQR+GEPGTMGPPGVK+GFGNLGTEFWLGNDYLHLLTANGNQELR+LTLGQFLEGTAGDSLTK+VDGSIDFFR+VDLQDFQGK+VVGLGAQDK+VVVIQSCPGFPGPPGPKGEPGSPAGRGER+YLSGSHESYADGINWGTGQGHHYSYK+YSSFQVSEEQEK	1	.
IPI00115766	Bloc1s1	biogenesis of lysosome-related organelles complex 1 subunit 1.	14281	O55102,	1	8	EAIAAATCLTEALVDHLNVGVAQAYMNQR+EIGDVENWAR+QTGQWIGMVENFNQALK+TIATALEYVYK+TLQVQAAQFAK	1	.
IPI00115793	Dsg2	desmoglein-2.	122397	O55111,	1	2	ITHQESTSVLLQQSER+SEIPFLISDSQGFSCPER+VQDTDNWVSVDSVTSEIK+VVPSLLVADHAESSAVR	2	IPI00877308;
IPI00115831	Sap18	histone deacetylase complex subunit sap18.	17595	O55128,	1	17	EIGSTMSGR+FQIGDYLDIAITPPNR+GNVPSSELQIYTWMDATLK+KGTDDSMTLQSQK	1	.
IPI00115833	Mtap6	isoform 1 of microtubule-associated protein 6.	96450	Q7TSJ2-1,	0.83	2	DPEGAGGAGVLAAGK+DTGTDTTAPR+KDQHVSIMASLK+NEAPMVPESVKNQGLAGPELVKDTGTDTTAPR+QVVSGQAAK+TSTSHKPPR	1	.
IPI00115862	Eif6	eukaryotic translation initiation factor 6.	26511	O55135,	0.94	4	TSIEDQDELSSLLQVPLVAGTVNR	2	IPI00857575;
IPI00115866	Hagh	hydroxyacylglutathione hydrolase.	34103	Q99KB8,	1	76	ALLEVLGR+FYEGTADEMYK+HVEPGNAAIQEK+LTTVLTTHHHWDHAGGNEK+RGLGQALLGLSLCHSDFR+RGLGQALLGLSLCHSDFRK+SLSALGATCARR+TVQQHAGETDPVTTMR+VTHLSTLQVGSLSVK+VYCGHEYTVNNLK+YAIGEPTVPSTLAEEFTYNPFMR	1	.
IPI00115875	Pi4ka	phosphatidylinositol 4-kinase, catalytic, alpha polypeptide.	231371	.	1	4	CGMILQEAMK+CLKAGLTVDPVIVEAFLASLSNRLYISQESDK+EFCIPLEMLR+EMAGAWHMTVEQK+FPVVVHSVTPSLR+ISVTNEHSESTLNVLPGK+ITVPDTYEAR+QNTTLGATQLTERPACVK	1	.
IPI00115900	Hivep2	transcription factor hivep2.	266705	Q3UHF7,	0.96	6	CLELGVSMTSVDDTETEEAENMEELHK+CSSEQMPCPHPTEVPEIR+EDFASENAGPLQSLPGTVVPVR+ESSDELDMDETSSDMSMSPQSSALPTGGGQQEEEGK+GGYHGSLEESLGGPMK+IQTHVPSYGSVMYTSISQILGQNSPAIVICK+KCFLVR+LDIPSSMDEEAMLSSEPSSSPR+MLSPASSLELFMETK+QGGEYFMDPSVPVQGVPTMFGTTCENR+QGGEYFMDPSVPVQGVPTMFGTTCENRK+RMLSPASSLELFMETK+SVGDEEDVPMICGGMGNAPVGMMSSEYDPK+VSPGPPVPLDIASR	1	.
IPI00115941	Lcn2	neutrophil gelatinase-associated lipocalin.	22875	P11672,	1	19	AGQFTLGNMHR+DDNIIFSVPTDQCIDN+SLGLKDDNIIFSVPTDQCIDN+WYVVGLAGNAVQK+YPQVQSYNVQVATTDYNQFAMVFFR	1	.
IPI00115973	Cfp	properdin.	50327	P11680,	1	235	ACSGLPPCPVAGGWGPWSPLSPCSVTCGLGQTLEQR+CGGHCPGEAQQSQACDTQK+DIRVEDCCLNAAYAFQEHDGGLCQACR+HCYNIHNCIMK+LCTPLLPK+MSINCEGTPGQQSR+QRVCDNPAPK+SCLHVPVCKDPEEK+SCSAPAPSHQPPGKPCSGPAYEHK+VEDCCLNAAYAFQEHDGGLCQACR	1	.
IPI00115987	Nasp	nuclear autoantigenic sperm protein isoform 1.	48766	.	1	6	EAQLYAAQAHLK+HLVMGDIPAAVNAFQEAASLLGK+YGETANECGEAFFFYGK	3	IPI00130959;IPI00830976;
IPI00115992	.	similar to ribosomal protein s25.	13708	.	1	39	AALQELLSK+DKLNNLVLFDK+LITPAVVSER+LNNLVLFDK	5	IPI00137735;IPI00677917;IPI00848593;IPI00850188;
IPI00116031	Rbm10	isoform 1 of rna-binding protein 10.	103494	Q99KG3-1,	1	12	DQDYRTEQGEEEEEEDEEEEEEKASNIVMLR+GDPAGTGPEASLEAGADSVSLQAFSR+GFAFVEFSHLQDATR+MLPQAATEDDIR+NSFQPISALR+TYIPALEQSADGHK+VSMHYSDPKPK	3	IPI00776254;IPI00875654;
IPI00116072	Ak5	adenylate kinase 5.	63323	Q920P5,	0.85	1	GFLIDGYPR+QELTSESER+WDTFVSQEKK	1	.
IPI00116074	Aco2	aconitate hydratase, mitochondrial.	85464	Q99KI0,	1	34	DINQEVYNFLATAGAK+DVGGIVLANACGPCIGQWDRK+IVYGHLDDPANQEIER+LNRPLTLSEK+LQLLEPFDKWDGKDLEDLQILIK+NAVTQEFGPVPDTAR+SDFDPGQDTYQHPPK+SQFTITPGSEQIR+WVVIGDENYGEGSSR	1	.
IPI00116105	Serpina6	corticosteroid-binding globulin.	44769	Q06770,	1	433	AGEQINNHVK+AMLQLDEGNVLPAATNGPPVHLPSESFTLK+DLAPTNVDFAFNLYK+DTPLTLTVLHK+FSMSDTYDLQDVLADVGIK+GSTQYLENLGFNMSK+HYYESEALTIPSK+HYYESEALTIPSKDWTK+IEHVVSDLDSSATLILINYIFLK+LKDSFLADTK+LPFSPENTR+NTLISPVSISMALAMLSLSTR+QMNLYIPK+YNRPFIFLAFDK+YNRPFIFLAFDKYTWSSLMMSQVMNPA+YTWSSLMMSQVMNPA	1	.
IPI00116112	Dctn2	dynactin subunit 2.	44117	Q99KJ8,	1	40	ENLATVEGNFASIDAR+LLGPDAAINLADPDGALAK+LLGPDAAINLADPDGALAKR+LLHEVQELTTEVEK+LTELEATVR+QQLVASHLEK+RTGYESGDYEMLGEGLGVK+VHQLYETIQR+VSALDLAVLDQVEAR+WSPVASTLPELVQR	1	.
IPI00116120	Pdcd5	programmed cell death protein 5.	14535	P56812,	1	9	KVMDSDEDDADY+LSNLALVKPEK+NSILAQVLDQSAR+VSEQGLIEILEK	2	IPI00885252;
IPI00116134	Dpp3	dipeptidyl-peptidase 3.	82911	Q99KK7,	0.93	1	LEGSEVQLVEYEASAAGLIR+REKLTFLEEEDK	1	.
IPI00116222	Hibadh	3-hydroxyisobutyrate dehydrogenase, mitochondrial.	35440	Q99L13,	1	19	DFSSVFQYLR+EAGEQVASSPAEVAEK+GSLLIDSSTIDPSVSK+HGYPLILYDVFPDVCK+ICNNMLLAISMIGTAEAMNLGIR+IITMLPSSMNAVEVYSGANGILK+KGSLLIDSSTIDPSVSK+MGAVFMDAPVSGGVGAAR+TPILLGSLAHQIYR+TPVGFIGLGNMGNPMAK	1	.
IPI00116228	Ppif	peptidyl-prolyl cis-trans isomerase, mitochondrial.	21737	Q99KR7,	0.98	8	FPDENFTLK+HVGPGVLSMANAGPNTNGSQFFICTIK	1	.
IPI00116236	Gstt3	glutathione s-transferase, theta 3.	27403	.	1	6	GQQYTDSFAQVNPLR+MGLELYLDLMSQPCR+MMFPVFLGQPVPPEMLASTLAELDGCLQVLEDK+NQAFLTGSHISVADLVAITELMHPVSAGCK+QRVEAEVGESLFQEAHEVVLK+VDEYLAWQHTALR	1	.
IPI00116254	Prdx4	peroxiredoxin-4.	31053	O08807,	1	31	DYGVYLEDSGHTLR+ENECHFYAGGQVYPGEASR+GLFIIDDK+HGEVCPAGWKPGSETIIPDPAGK+QITINDLPVGR+QITLNDLPVGR+VSVADHSLHLSK	1	.
IPI00116264	Cxcl5	c-x-c motif chemokine 5.	14190	P50228,	1	7	CVCLTVTPK+EVCLDPEAPVIK+LIANLEVIPAGPQCPTVEVIAK	2	IPI00788344;
IPI00116277	Cct4	t-complex protein 1 subunit delta.	58066	P80315,	1	8	AFADAMEVIPSTLAENAGLNPISTVTELR+ALIAGGGAPEIELALR+GDVTITNDGATILK+GIHPTIISESFQK+QMQVLHPAAR+TIGTKPVAHIDQFTADMLGSAELAEEVSLNGSGK	1	.
IPI00116279	Cct5	t-complex protein 1 subunit epsilon.	59624	P80316,	1	12	AFADALEVIPMALSENSGMNPIQTMTEVR+IADGYEQAAR+LGFAGVVQEISFGTTK+QQISLATQMVR+SQDDEIGDGTTGVVVLAGALLEEAEQLLDR	1	.
IPI00116281	Cct6a	t-complex protein 1 subunit zeta.	58004	P80317,	0.99	11	AQAALAVNISAAR+KQLLHSCTVIATNILLVDEIMRAGMSSLK+MAAVKTLNPK+VATAQDDITGDGTTSNVLIIGELLK	1	.
IPI00116284	Sf1	isoform cw17 of splicing factor 1.	70408	Q64213-1,	1	10	AYIVQLQIEDLTR+FQRPGDPQSAQDK+TVIPGMPTVIPPGLTR+VMIPQDEYPEINFVGLLIGPR	5	IPI00387376;IPI00830797;IPI00830819;IPI00856488;
IPI00116302	Eif2s2	eukaryotic translation initiation factor 2 subunit 2.	38092	Q99L45,	0.81	1	IFDIDEAEEAIKDVK	2	IPI00480398;
IPI00116308	St13	hsc70-interacting protein.	41656	Q99L47,	1	35	AIDLFTDAIK+AIEINPDSAQPYK+EWVESMGGK+GAAIEALNDGELQK+KGAAIEALNDGELQK+LDYDEDASAMLR+LLGHWEEAAHDLALACK+QDPSVLHTEEMR	1	.
IPI00116310	Dnahc2	dynein, axonemal, heavy chain 2.	512308	P0C6F1,	1	12	DMFLMAAMGPPGGGR+DWNIQGLPSDAFSTENGIIVTR+EPYQELAFMKPK+EVLSAQESVETGENLGPLEEIEFWHNR+FIEPPVLNMK+FNIINMTFPTESQIIR+IFGTMINQK+ILQASLTSLCR+QCEEYLVIIVQQKR+QDHYDFGLRALTSLLR+QLGEQNFIK+RPPIFGDFLK+RYNYVTPTNYLELVSGYK+SMFRPIAMVVPDSTLIAEIILFGEGFGNCK+VEVMSLELEDAK	1	.
IPI00116372	Mlf2	myeloid leukemia factor 2.	28055	Q99KX1,	1	2	AEGPPRLAIQGPEDSPSRQSR+DSDSGLEQMSIGHHIR+LAIQGPEDSPSR+QDYINLDESEAAAFDDEWR	2	IPI00750944;
IPI00116414	Sntb1	isoform 1 of beta-1-syntrophin.	58081	Q99L88-1,	0.88	1	GSPVSEIGWETPPPESPR+MAVAAAAVAAPAGGGGAR+VLVNLSEDALVLSCEEGAAAYNGIGAATNGSFCR	2	IPI00230613;
IPI00116432	Fmo1	dimethylaniline monooxygenase [n-oxide-forming] 1.	59915	P50285,	0.95	9	EEPIDIIVFATGYTFAFPFLDESVVK+ENSVVFNNTPK+HPDIFKDKR+VFDSGYPWDMIFMTR	1	.
IPI00116462	D10Bwg1379e	brefeldin a-inhibited guanine nucleotide-exchange protein 3.	240091	Q3UGY8,	1	14	AMAQQVFMLDTQCSPK+CLLPLQLALESKNVK+CWSLVAPHLVEAACHKERHVSQK+EFDTSPGLK+EKCLLPLQLALESKNVK+KRPTVAPGMMK+LFIQSLEGLLPR+LHKLCMELCNHYIQMHLDLESSLEEPLTFK+LSCALGVAANCASALAQMAAASCVQEEK+LSCALGVAANCASALAQMAAASCVQEEKEER+NTPSEDDRR+SDVSDIGSDNCSLADEEQTPR+VLLYPPPQHR	1	.
IPI00116489	Nppa	atrial natriuretic factor.	16645	P05125,	0.94	1	NLLDHLEEK	2	IPI00553811;
IPI00116498	Ywhaz	14-3-3 protein zeta/delta.	27771	P63101,	1	110	DSTLIMQLLR+GIVDQSQQAYQEAFEISK+GIVDQSQQAYQEAFEISKK+SVTEQGAELSNEER+TAFDEAIAELDTLSEESYK+YLAEVAAGDDK+YLAEVAAGDDKK	1	.
IPI00116546	Prkar2a	camp-dependent protein kinase type ii-alpha regulatory subunit.	45389	P12367,	0.9	2	KMFESFIESVPLFK+NISHYEEQLVK	2	IPI00169788;
IPI00116554	Ptpn11	isoform 1 of tyrosine-protein phosphatase non-receptor type 11.	68460	P35235-1,	0.8	2	NPMVETLGTVLQLK+YPLNCADPTSER	2	IPI00316479;
IPI00116563	Rab5b	rab5b.	25275	P61021,	0.96	1	FEIWDTAGQER	7	IPI00132410;IPI00224518;IPI00404579;IPI00458976;IPI00649007;IPI00849548;
IPI00116591	Acads	short-chain specific acyl-coa dehydrogenase, mitochondrial.	44947	Q07417,	1	9	ACASTGVIMSVNNSLYLGPILK+EHLFPTAQVK+ENLLGEPGMGFK+GISAFLVPMPTPGLTLGK+IGCFALSEPGNGSDAGAASTTAR+IGCFALSEPGNGSDAGAASTTAREEGDSWVLNGTK+ITEIYEGTSEIQR+LADMALALESAR+QTCRDFAEK	2	IPI00331251;
IPI00116649	Cnn2	calponin-2.	33156	Q08093,	1	1	CDNSSMSLQMGYTQGANQSGQVFGLGR+SMQNWHQLENLSNFIK+SWIEGLTGLSIGPDFQK	2	IPI00830538;
IPI00116670	Otog	otogelin.	313620	O55225-1,	0.84	5	CPSASIYNHNINTYAR+DGSVLGEAEDPAPFLDSWQVPSSLTSEGQTR+EEGAASLLTTSHPPGFSSSLPSSLQMPTSGIVSGATETTK+GLEVVSATEK+STSELSFSVMVEDVNCYGSGVICR+TWGQHHVETFDGLYYYFSGK+VTITFTGSPNTTVASR+YDACASPCFQTCR+YTFPATCQYILAK	1	.
IPI00116697	Rab6	isoform 1 of ras-related protein rab-6a.	23590	P35279-1,	0.99	4	ELNVMFIETSAK+LQIWDTAGQER+LVFLGEQSVGK+MSAGGDFGNPLR+TERGSDVIIMLVGNKTDLADK	2	IPI00230011;
IPI00116705	Fabp4	fatty acid-binding protein, adipocyte.	14650	P04117,	1	44	EVGVGFATR+EVGVGFATRK+LGVEFDEITADDR+LGVEFDEITADDRK+LVSSENFDDYMK+LVSSENFDDYMKEVGVGFATRK+LVVECVMK+SIITLDGGALVQVQK+VAGMAKPNMIISVNGDLVTIR	1	.
IPI00116718	.	similar to loc446231 protein.	17931	.	1	22	ADLAEEYSK+GQVCLPVISAENWK+IEINFPAEYPFKPPK+IYHPNIDEK+NIQVDEANLLTWQGLIVPDNPPYDK+TDQVIQSLIALVNDPQPEHPLR	1	.
IPI00116752	Sec23ip	sec23-interacting protein.	110780	Q6NZC7,	1	25	FIPYTEEFSEK+KESPELSK+LLQTHFKK+VSVAGHSLGSLILFDILSNQR	1	.
IPI00116753	Etfa	electron transfer flavoprotein subunit alpha, mitochondrial.	35009	Q99LC5,	1	120	AAVDAGFVPNDMQVGQTGK+APSSSSVGISEWLDQK+DPEAPIFQVADYGIVADLFK+GLLPEELTPLILETQK+GTSFEAAATSGGSASSEK+IVAPELYIAVGISGAIQHLAGMK+LGGEVSCLVAGTK+LLYDLADQLHAAVGASR+LNVAPVSDIIEIK+LTKSDRPELTGAK+QFSYTHICAGASAFGK+SDRPELTGAK+SPDTFVR+TIVAINKDPEAPIFQVADYGIVADLFK+TIYAGNALCTVK+VLVAQHDAYK	1	.
IPI00116850	D10Wsu52e	upf0027 protein c22orf28 homolog.	55249	Q99LF4,	1	11	GLGHQVATDALVAMEK+LVMEEAPESYK+NACRGGGVGGFLPAMK+QIGNVAALPGIVHR	1	.
IPI00116913	Lama5	laminin subunit alpha-5.	404011	Q61001,	0.97	5	AHVCGKTCAACK+CATGYWGFPNCRPCDCGAR+DTQHHLAIFHLDSEASIR+EDLEHLAASLDGAWTPLLK+FGFNPLEFENFSWR+IWQGHANASFCPHGYGCR+LLINGAPVNVTASVQIQGAVGMR+RCQCPR+VFDLHQNMGSVNVSVGCTPAQLIETSR	1	.
IPI00116945	Cfd	isoform 1 of complement factor d.	28057	P03953-1,	1	1401	DTCRGDSGSPLVCGDAVEGVVTWGSR+EVEPGTLCDVAGWGVVTHAGR+GDSGSPLVCGDAVEGVVTWGSR+KPGVYTR+MWIENITNGNMTS+RPDVLHQLR+TYHDGVVTINMMCAESNR+TYHDGVVTINMMCAESNRR+WYDVQSVVPHPGSRPDSLEDDLILFK	2	IPI00224671;
IPI00116968	Ncoa2	nuclear receptor coactivator 2.	158512	Q61026,	0.81	12	ECPDQLGPSPKR+ELSQESSSTAPGSEVTVK+GQGLNVTPSMVAPAGLPAAMSNPR+KECPDQLGPSPKR+LLQDSSSPVDLAK+QPLMNQISSVSNVNLTLRPGVPTQAPINAQMLAQR+SMVNGGSWSGEPPRR	2	IPI00408178;
IPI00117011	Hcls1	hematopoietic lineage cell-specific protein.	54212	P49710,	1	5	EVQQPSMPVEEPAAPAQLPK+GHFGLFPANYVK+KTTPIEAASSGARGLK+SAVGFNEMEAPTTAYK+SAVGHEYVADVEK+TEHINIHQLR	1	.
IPI00117016	Mcm4	dna replication licensing factor mcm4.	96736	P49717,	1	10	ALADDDFLTVTGK+DYIAYAHSTIMPR+FDLIFLMLDPQDEAYDR+NLNPEDIDQLITISGMVIR+QLVLQTGALVLSDNGICCIDEFDK+SMRNLNPEDIDQLITISGMVIR+VEAIDVEEAKR+YQQLFEDIR	1	.
IPI00117063	Fus	rna-binding protein fus.	52673	P56959,	1	16	AAIDWFDGK+GEATVSFDDPPSAK+GGYGGGGSGGGGRGGFPSGGGGGGGQQRAGDWK+HDSEQDNSDNNTIFVQGLGENVTIESVADYFK+LKGEATVSFDDPPSAK+TGQPMINLYTDR	2	IPI00830623;
IPI00117083	Grpel1	grpe protein homolog 1, mitochondrial.	24307	Q99LP6,	1	33	EEISNNNPHLK+EPGTVALVSK+FDPYEHEALFHTPVEGK+RALADTENLR+TLRPALVGVVK+VGYKLHGR	1	.
IPI00117115	Lamc2	laminin, gamma 2.	130339	Q61092,	1	5	AQGGGGGGTVPSGELEGR+CQPGFHMLTDAGCTR+EAQISEGAMR+EMEGELARK+FLGNQQVSYGQSLSFDYR+LDDLKMTAER+MQQAEQALR+NHLHLLETSIDGILADVK+TQQAETALGSATADTQR	1	.
IPI00117167	Gsn	isoform 1 of gelsolin.	85942	P13020-1,	1	1510	AGKEPGLQIWR+AQVHVSEEGGEPEAMLQVLGPKPALPEGTEDTAK+ATEVPVSWDSFNNGDCFILDLGNNIYQWCGSGSNK+DGGQTAPASIR+DPDQTDGPGLGYLSSHIANVER+DSQEEEK+DSQEEEKTEALTSAK+EPAHLMSLFGGKPMIIYK+EPGLQIWR+EVQGFESSTFSGYFK+FDLVPVPPNLYGDFFTGDAYVILK+FVIEEVPGELMQEDLATDDVMLLDTWDQVFVWVGK+HVVPNEVVVQR+IEGSNKVPVDPATYGQFYGGDSYIILYNYR+KGGVASGFK+KMDAHPPR+MDAHPPR+NWRDPDQTDGPGLGYLSSHIANVER+QGFEPPSFVGWFLGWDDNYWSVDPLDR+QTQVSVLPEGGETPLFK+RTPITVVR+R…	1	.
IPI00117178	Aip	ah receptor-interacting protein.	37605	O08915,	0.98	1	TLHSDNEGSVIDDSR	2	IPI00880643;
IPI00117181	Flot1	flotillin-1.	47513	O08917,	1	4	AQLIMQAEAEAESVR+AQQVAVQEQEIAR+EMLAAACQMFLGK+ITLVSSGSGTMGAAK	1	.
IPI00117232	Fusip1	isoform 3 of fus-interacting serine-arginine-rich protein 1.	22222	Q9R0U0-3,	1	99	DAEDALHNLDR+GFAYVQFEDVR+KTPNQMK+MSRYLRPPNTSLFVR+QIEIQFAQGDR+YGPIVDVYVPLDFYTR+YLRPPNTSLFVR	4	IPI00314984;IPI00473196;IPI00649867;
IPI00117239	Reg1	lithostathine-1.	18519	P43137,	0.95	2	ESGTTDANVWTGLHDPK+NAYFILLSCLIVLSPSQGQEAEEDLPSAR	1	.
IPI00117264	Park7	protein dj-1.	20021	Q99LX0,	1	48	DVMICPDTSLEDAK+GAEEMETVIPVDVMR+GLIAAICAGPTALLAHEVGFGCK+GPGTSFEFALAIVEALVGK+MMNGSHYSYSESR+TQGPYDVVVLPGGNLGAQNLSESPMVK+VTVAGLAGKDPVQCSR	2	IPI00895414;
IPI00117281	Gpx4	isoform mitochondrial of phospholipid hydroperoxide glutathioneperoxidase, mitochondrial.	22182	O70325-1,	1	11	DIDGHMVCLDK+EFAAGYNVK+ILAFPCNQFGR+RYGPMEEPQVIEK+TDVNYTQLVDLHAR+YGPMEEPQVIEK	2	IPI00660262;
IPI00117288	Hnrnpab	heterogeneous nuclear ribonucleoprotein a/b.	30831	Q99020,	1	130	EVYQQQQYGSGGR+EYFGQFGEIEAIELPIDPK+FHTVSGSKCEIK+GFGFILFK+GFVFITFK+IFVGGLNPEATEEK+KAMAMKK+MFVGGLSWDTSK+MFVGGLSWDTSKK	3	IPI00277066;IPI00648228;
IPI00117312	Got2	aspartate aminotransferase, mitochondrial.	47411	P05202,	1	5	FVTVQTISGTGALR+VGASFLQR	1	.
IPI00117315	Ela2a	elastase-2a.	28914	P05208,	0.98	2	NYVCYVTGWGLLQTNGNSPDTLR+SSMVCAGGDGVTSSCNGDSGGPLNCR+VLLGAHSLSNPGAGSAAVQVSK	1	.
IPI00117352	Tubb5	tubulin beta-5 chain.	49671	P99024,	1	63	AILVDLEPGTMDSVR+ALTVPELTQQVFDAK+EIVHIQAGQCGNQIGAK+EVDEQMLNVQNK+FWEVISDEHGIDPTGTYHGDSDLQLDR+GHYTEGAELVDSVLDVVR+ISEQFTAMFR+ISVYYNEATGGK+LHFFMPGFAPLTSR+MAVTFIGNSTAIQELFK+MAVTFIGNSTAIQELFKR+NMMAACDPR+NSSYFVEWIPNNVK+SGPFGQIFRPDNFVFGQSGAGNNWAK	1	.
IPI00117371	Snrpf	small nuclear ribonucleoprotein polypeptide f.	19808	P62307,	1	1	CNNVLYIR+GVEEEEEDGEMRE	3	IPI00379355;IPI00666526;
IPI00117375	Sdcbp	syntenin-1.	32379	O08992,	1	10	RMAPSIMK+SIDNGIFVQLVQANSPASLVGLR+SLMDHTIPEV	2	IPI00648280;
IPI00117424	Icam2	intercellular adhesion molecule 2.	31390	P35330,	1	5	AFEVYIWSEK+DTVFFCHFTCSGK+VFVGEDFTIECTVSPVQPLER+VYQPPAQVTLK	1	.
IPI00117475	Tgm3	protein-glutamine gamma-glutamyltransferase e.	77324	Q08189,	1	4	GSDSVWNFHVWNEGWFVR+NLSVDVYYDAMGNPLEK+QLLADFSCNK+RDPVTDVAR+SQGVFQCGPASVNAIK+VITNFNSAHDTDR	3	IPI00828798;IPI00875619;
IPI00117642	Gtpbp4	nucleolar gtp-binding protein 1.	74113	Q99ME9,	0.96	1	KLEELEKEEELR+SLGVDMDDK	1	.
IPI00117657	Opa1	isoform 1 of dynamin-like 120 kda protein, mitochondrial.	111339	P58281-1,	1	8	AAVACEVCQSLVK+ATDHGSESDK+DFFTAGSPGETAFRATDHGSESDK+IDQLQEELLHTQLK+MLAITANTLR+MVLVDLPGVINTVTSGMAPDTK+TQEQCVHNETK+VSTHVIENIYLPAAQTMNSGTFNTTVDIK+VTLSEGPHHVALFK+YIILGSAVGGGYTAKK	2	IPI00403336;
IPI00117687	0610009D07Rik	pre-mrna branch site protein p14.	14585	P59708,	1	68	GTAYVVYEDIFDAK+ITAEEMYDIFGK+YGINTDPPK+YLVVLYYNANR	1	.
IPI00117689	Ptrf	polymerase i and transcript release factor.	43954	O54724,	1	26	AHATTSNTVSK+IIGAVDQIQLTQAQLEER+KLEVNEAELLR+QAEMEGAVQSIQGELSK+SDQVNGVLVLSLLDK+VMIYQDEVK	1	.
IPI00117754	Sdf4	45 kda calcium-binding protein.	42064	Q61112,	1	53	AVDPDGDGHVSWDEYK+DMDGFDEDSEPR+VDVNTDR	2	IPI00653769;
IPI00117773	Shc3	shc-transforming protein 3.	52206	Q61120,	0.98	1	DLFDMKPFEDALR	5	IPI00125298;IPI00759853;IPI00759982;IPI00884546;
IPI00117811	Ap3d1	ap-3 complex subunit delta-1.	135081	O54774,	0.8	9	GEDLDFWLSTTPPPAAAPIPAPSTEELAASTITSPK+KNLMEIVKK+LRALDLLYGMVSKK+LTYLQMLGYDISWAAFNIIEVMSASK+RQPEEDEEELARR+SIQGHHVCLLVK	1	.
IPI00117831	Cp	ceruloplasmin.	121151	Q61147,	1	995	ADDKVLPGQQYVYVLHANEPSPGEGDSNCVTR+AEDEHLGILGPPIHANVGDK+AGLQAFFQVR+ALYFEYTDGTFSK+DCNKPSPEDNIQDR+DEVNWYVMGMGNEIDLHTVHFHGHSFQYK+DIASGLIGPLILCK+DIASGLIGPLILCKK+DIFTGLIGPMK+DLYSGLIGPLIVCR+DTANLFPHK+DVDKEFYLFPTVFDENESLLLDDNIR+EDEDFQESNK+EDSACIPWAYYSTVDR+EFYLFPTVFDENESLLLDDNIR+EMGPTYADPVCLSK+ETFTYEWTVPK+EYTDGSFTNR+GPDEEHLGILGPVIWAEVGDTIK+GQHPLSIQPMGVSFTAENEGTYYGPPGR+GTFDVECLTTDHYTGGMK+HYFIGITEAVWDYASGTEE…	2	IPI00605187;
IPI00117888	Fadd	protein fadd.	22960	Q61160,	0.98	1	LNLVADLVEEAQESVSK	1	.
IPI00117896	Mapre1	microtubule-associated protein rp/eb family member 1.	30016	Q61166,	1	10	FFDANYDGK+FQDNFEFVQWFK+LEHEYIQNFK	1	.
IPI00117910	Prdx2	peroxiredoxin-2.	21779	Q61171,	1	270	EGGLGPLNIPLLADVTK+KEGGLGPLNIPLLADVTK+LGCEVLGVSVDSQFTHLAWINTPR+LGCEVLGVSVDSQFTHLAWINTPRK+LVQAFQYTDEHGEVCPAGWKPGSDTIKPNVDDSK+QITVNDLPVGR+SAPDFTATAVVDGAFK+SAPDFTATAVVDGAFKEIK+SLSQNYGVLK	1	.
IPI00117914	Arg1	arginase-1.	36260	Q61176,	1	216	ANEELAGVVAEVQK+DHGDLAFVDVPNDSSFQIVK+DIVYIGLR+DVDPGEHYIIK+EGLYITEEIYK+EGNHKPGTDYLKPPK+FPDVPGFSWVTPCISAK+GKFPDVPGFSWVTPCISAK+KRPIHLSFDVDGLDPAFTPATGTPVLGGLSYR+LKETEYDVR+RPIHLSFDVDGLDPAFTPATGTPVLGGLSYR+SLEIIGAPFSK+STVNTAVALTLACFGTQR+SVGKANEELAGVVAEVQKNGR+TGLLSGLDIMEVNPTLGK+VMEETFSYLLGR+VSVVLGGDHSLAVGSISGHAR+YFSMTEVDK	1	.
IPI00117947	OTTMUSG00000024510	methylosome subunit picln.	26021	Q61189,	1	6	GLGTGTLYIAESR+GLGTGTLYIAESRLSWLDGSGLGFSLEYPTISLHAVSR+LQQPDTEAVLNGK+NYEDGMEVETTPTVAGQFEDADVDH	2	IPI00124248;
IPI00117975	Sftpd	pulmonary surfactant-associated protein d.	37688	P50404,	1	8	GAPGVQGAPGNAGAAGPAGPAGPQGAPGSR+GENGSAGEPGPK+GPPGLKGDRGVPGDR+LEVAFSHYQK+MLPFLSMLVLLVQPLGNLGAEMK+SATENAAIQQLITAHNK+TADSEKPFEDAQEMCK	1	.
IPI00117977	Sftpb	pulmonary surfactant-associated protein b.	41728	P50405,	1	4	FLEQECDILPLK+SQDAHITCQALGVCEAPASPLQCFQTPHL	1	.
IPI00118059	Shmt1	serine hydroxymethyltransferase, cytosolic.	52585	P50431,	0.97	1	IMGLDLPDGGHLTHGFMTDKK+ISATSIFFESMPYK+QAMTTEFK+YYGGTEFIDELEMLCQK	2	IPI00608017;
IPI00118120	Myo5a	myosin-va.	215595	Q99104,	0.99	8	CALFEKPRMSNKAFIIK+DSPQLLMDAK+EEMTLMLNVPKPGHK+KEKDFQGMLEYK+QGGSPMIEGVDDAK+QMFYIVGAITLNNLLLR+QNEHCLTNFDLAEYR+SLLTSTINSIK	3	IPI00875222;IPI00890268;
IPI00118129	Nxf2	nuclear export factor 2.	80625	.	0.99	6	DLIVPTGNPQDGK+EYYLFYDNGDR+MNYNHGFQGR+VTIPSGRK+YGLPYKR	3	IPI00831088;IPI00831666;
IPI00118130	Orm1	alpha-1-acid glycoprotein 1.	23895	Q60590,	1	808	AVTHVGMDESEIIFVDWK+AVTHVGMDESEIIFVDWKK+HGAFMLAFDLK+HGAFMLAFDLKDEK+KDPEEGQA+KHGAFMLAFDLK+KQLELGK+RPDITPELR+RPDITPELREVFQKAVTHVGMDESEIIFVDWK+WFFMGAAFR+YEGGVETFAHLIVLR	1	.
IPI00118135	Tex11	isoform 1 of testis-expressed sequence 11 protein.	109624	Q14AT2-1,	0.93	2	EHLHPAGLFLK+IILPQAFHMPESEYK+LVYMHGISVSSEEAIQR+QILMNIK+TALEQIKKCK+WAAMALDFLGHLSTLK	1	.
IPI00118143	Cttn	src substrate cortactin.	61260	Q60598,	1	6	NASTFEEVVQVPSAYQK+QEQEEARR+TVQGSGHQEHINIHK+YGLFPANYVELR	3	IPI00121977;IPI00624988;
IPI00118190	Gdf7	isoform 2 of growth/differentiation factor 7.	47106	P43029-2,	1	31	AAAEPPPDPGPGAGSRKANLGGR+AVTASESSPLALR+GAQGSGGGGGGGGGGGGGGGGGGGGAGR+GAQGSGGGGGGGGGGGGGGGGGGGGAGRGHGRR+KANLGGRR+MDLSAAAALCLWLLSACRPR+TALAGTRGAQGSGGGGGGGGGGGGGGGGGGGGAGR	2	IPI00454190;
IPI00118227	Mrpl27	39s ribosomal protein l27, mitochondrial.	15945	Q99N92,	1	13	TFVHVVPAKPEGTFK	1	.
IPI00118238	Myo7b	myosin-viib.	241085	Q99MZ6,	0.92	46	ATDDITLLPFKK+DQCCIISGESGAGK+DVLSTDILILIHSSK+EDAIHLGGLICK+ERSVFAMALQDRR+ITDKVISLKEGDFFFDSLR+KINAAIFTPQAQDPQNVRR+KSGFPIR+KSIYDTVTDTAMVEK+RATDDITLLPFK+RDQCCIISGESGAGK+RSQALDGAAIRIQR+YSGMMETVHIRK	1	.
IPI00118271	.	obscurin, cytoskeletal calmodulin and titin-interacting rhogef.	821428	.	1	32	AAPVEWR+AENPLGSASAAAALVVDSDAEVAGPPGTSTATLLAHLQQRR+AIGIVAQGTCR+CHLAVQGPVHILTLSALQPQDSGLVAFR+CLAENSMGVSSTK+CVLSSVAAPVEWRHGDDVLK+DATLSCQIVGNPTPHVSWEK+DGQPLTTSDHIRMTDK+EDSGQYAAYISNAVGAAYSSAR+EPTVPFK+KAGGPGISPLASK+KEEATEGTMVTLR+KYLLQAR+LEVLEPPHDASVK+LIVTELPVSFTR+LSCFVTGEPKPETVWKK+LSFHLDVTEPK+MDHSFSGAPR+NMFATMGIGVEISLGEQGPR+QDGAMCELQICGLAVEDAGEYSCVCGQEK+QDGAVCELQICSLLVADAGEYSCVCGQEK+QDGAVCELQIR+QDGAVCG…	2	IPI00855152;
IPI00118286	Sfn	14-3-3 protein sigma.	27713	O70456,	0.98	5	DSTLIMQLLR+EMPPTNPIR+TTFDEAMADLHTLSEDSYK	2	IPI00844680;
IPI00118304	Cep350	centrosome-associated protein 350 isoform 1.	346194	.	0.94	6	EEISSPDMCPRPESPVFGASGQEELAK+ENEKPFHGEK+FLNDGPAIDALHSSECLMK+FTMEMVRQYMKEEEVR+GIALAQQESVSLAQIIK+GTLVSRPLNATATPLSSVSYEDDFVSSPGSGTLTERK+IEALKATAASLSSR+ITANEDPPVISKK+KAQTESR+KNNRVEFR+KVVKPVR+MAAELSYLSALEESVR+MDWLDSLTGSAQNPLIDEEK+QFACDLASVDATSQHSSGAR+RDLMEPTWMQPDR+RLDAEEAEIQQMEK+RSLCSSIDSVSEGPLLSEGSLSEEEERR+SLPSMHNTDASVDKDR+TEMASAPGPQR	2	IPI00668613;
IPI00118312	Tpo	thyroid peroxidase.	101342	P35419,	0.97	4	AYLPFATAACAPEPGTPR+DYIPKILGPDAFR+EQSQFSTDALSADILGTIANLSGCLPFMLPPR+GSFQCVCTDPYVLGEDEKTCIDSGRLPR+LIQEGGLDPIVR+QYVGPYEGYNPTVNPTVSNIFSTAAFR+WGASNTALAR+YRPITGACNNR	1	.
IPI00118344	Ugdh	udp-glucose 6-dehydrogenase.	54832	O70475,	1	18	DVLNLVYLCEALNLPEVAR+EQIVVDLSHPGVSADDQVSR+IFDANTKPNLNLQVLSNPEFLAEGTAIK+ILTTNTWSSELSK+INAWNSPTLPIYEPGLK+ISSINSISALCEATGADVEEVATAIGMDQR+KIAILGFAFKK+KICCIGAGYVGGPTCSVIAHMCPEIR+KMLKPAFIFDGRR+VLDGLHSELQTIGFQIETIGK+YLMDEGAHLHIYDPK+YWQQVIDMNDYQRR	1	.
IPI00118355	Pnliprp1	pancreatic lipase-related protein 1.	52696	Q5BKQ4,	1	8	GIIKPGATHSNEFDAK+KNALSQIVDIDGIWSGTR+MLILWTIPLFLLGAAQGK+VVGAQVAQMIDILVR	1	.
IPI00118384	Ywhae	14-3-3 protein epsilon.	29174	P62259,	1	114	AAFDDAIAELDTLSEESYK+AAFDDAIAELDTLSEESYKDSTLIMQLLR+AASDIAMTELPPTHPIR+DSTLIMQLLR+EAAENSLVAYK+EDLVYQAKLAEQAER+HLIPAANTGESK+KEAAENSLVAYK+LAKAAFDDAIAELDTLSEESYK+VAGMDVELTVEER+YDEMVESMK+YDEMVESMKK+YLAEFATGNDR+YLAEFATGNDRK	1	.
IPI00118413	Thbs1	thrombospondin 1.	129690	P35441,	1	414	AGTLDLSLSLPGK+AQLYIDCDK+CDNCPYNHNPDQADTDK+CEGSSVQTR+CGACPPGYSGNGIQCK+CNYLGHYSDPMYR+CTSYPDGSWK+DCVGDVTENQVCNK+DGIGDACDDDDDNDK+DLQAICGLSCDELSSMVLELK+DNCQYVYNVDQR+DNTGQIFSVVSNGK+EVPDACFNHNGEHR+FQDLLDAVWADK+FVFGTTPEDILR+GDVNDNFQGVLQNVR+GFIFLASLR+GLGVLFLLHMCGSNR+GQDLSSPAFR+GTSQNDPNWVVR+GVEHAMANK+IENANLIPAVPDDK+IENANLIPAVPDDKFQDLLDAVWADK+IMADSGPIYDK+IPESGGDNGVFDIFELIGGAR+KDNCPNLPNSGQEDYDKDGIGDACDDDDDND…	1	.
IPI00118455	Saa1	serum amyloid a-1 protein.	13770	P05366,	1	27	DPNYYRPPGLPDK+DPNYYRPPGLPDKY+EAFQEFFGR+GHEDTIADQEANR+GPGGVWAAEK+LLTSLVFCSLLLGVCHGGFFSFVHEAFQGAGDMWR+SGKDPNYYRPPGLPDK+SGKDPNYYRPPGLPDKY	1	.
IPI00118457	Saa2	serum amyloid a-2 protein.	13622	P05367,	1	5	DPNYYRPPGLPAK+ESFQEFFGR+GHEDTMADQEANR+GPGGVWAAEK+SGKDPNYYRPPGLPAK	1	.
IPI00118469	Oxt	oxytocin-neurophysin 1.	12851	P35454,	1	7	CFGPSICCADELGCFVGTAEALR	3	IPI00118471;IPI00875591;
IPI00118499	Uchl4	ubiquitin carboxyl-terminal hydrolase isozyme l4.	26450	P58321,	1	9	KFLEESVSMSPEER+VTHETSAHEGQTEAPSIDEK+WLPLEANPEVTNQFLK	2	IPI00311369;
IPI00118590	H1fx	h1 histone family, member x.	20151	.	1	6	ALVQNDTLLQVK+GASAASSPAPK+YSQLVVETIR	1	.
IPI00118676	Eif4a1	eukaryotic initiation factor 4a-i.	46154	P60843,	1	38	DFTVSAMHGDMDQK+DIETFYNTSIEEMPLNVADLI+GIDVQQVSLVINYDLPTNR+GIYAYGFEKPSAIQQR+GVAINMVTEEDKR+KGVAINMVTEEDKR+MFVLDEADEMLSRGFK+VLITTDLLAR	1	.
IPI00118678	Tcp1	t-complex protein 1 subunit alpha a.	60341	P11984,	1	26	AFHNEAQVNPER+FATEAAITILR+HGSYENAVHSGALDD+QAGVFEPTIVK+YFVEAGAMAVRR	3	IPI00459493;IPI00845611;
IPI00118716	Dynlrb2	isoform 1 of dynein light chain roadblock-type 2.	10876	Q9DAJ5-1,	0.97	10	DIDPQNDLTFLR	2	IPI00469847;
IPI00118737	Tfpi	isoform alpha of tissue factor pathway inhibitor.	34987	O54819-1,	1	8	AASGAERPDFCFLEEDPGLCR+FVYGGCLGNR+KTCIPGYEKTAVK+NNFETLDECKK	5	IPI00229887;IPI00404625;IPI00754020;IPI00757917;
IPI00118757	Phpt1	14 kda phosphohistidine phosphatase.	13997	Q9DAK9,	1	11	VHLAEPSGDPAK+WAEYHADIYDK	1	.
IPI00118787	Atp6v1d	vacuolar proton pump subunit d.	28369	P57746,	1	7	AAGEVMEPANLLAEEK+DNVAGVTLPVFEHYHEGTDSYELTGLAR+FTAGDFSTTVIQNVNK+IIETKMLMGEVMR+MLMGEVMR+TLAYIITELDER	1	.
IPI00118819	Pafah1b3	platelet-activating factor acetylhydrolase ib subunit gamma.	25853	Q61205,	1	9	AHFLDADPGFVHSDGTISHHDMYDYLHLSR+LENGELEHIRPK+VVVLGLLPR	2	IPI00857485;
IPI00118821	Pafah1b2	platelet-activating factor acetylhydrolase ib subunit beta.	25581	Q61206,	1	4	ELFSPLHALNFGIGGDTTR+ICKPLHELIMQLLEETPEEK+LKNGELENIKPK	1	.
IPI00118832	Erp29	endoplasmic reticulum protein erp29.	28823	P57759,	1	4	DGDLENPVLYNGAVK+GALPLDTVTFYK+GQGVYLGMPGCLPAYDALAGEFIK+ILDQGEDFPASEMAR+MAAAAGVSGAASLSPLLSVLLGLLLLFAPHGGSGLHTK	1	.
IPI00118875	Eef1d	eukaryotic translation elongation factor 1 delta isoform a.	72930	P57776-1,	1	3	ATAPQTQHVSPMR+FEEHVQSVDIAAFNK+FYEQMNGPVTSGSR+KGATPAEDDEDK+QENGASVILR+SIQLDGLVWGASK+SLAGSSGPGASSGPGGDHSELIVR+SSILLDVKPWDDETDMAQLETCVR	2	IPI00515654;
IPI00118899	Actn4	alpha-actinin-4.	104977	P57780,	1	654	AGTQIENIDEDFR+AGTQIENIDEDFRDGLK+AIMTYVSSFYHAFSGAQK+ASFNHFDKDHGGALGPEEFK+ASIHEAWTDGK+DAKGISQEQMQEFR+DDPVTNLNNAFEVAEK+DGLAFNALIHR+DHALLEEQSK+DHGGALGPEEFK+DLLLDPAWEK+DYETATLSDIK+EAILAIHK+ETTDTDTADQVIASFK+FAIQDISVEETSAK+GISQEQMQEFR+GYEEWLLNEIR+HEAFESDLAAHQDR+HRPELIEYDK+HRPELIEYDKLR+HTNYTMEHIR+ISIEMNGTLEDQLSHLK+KAGTQIENIDEDFR+KAGTQIENIDEDFRDGLK+KDDPVTNLNNAFEVAEK+KHEAFESDLAAHQDR+LASDLLEWIR+LMLLLEVISGER…	1	.
IPI00118924	Serpinf2	alpha-2-antiplasmin.	54972	Q61247,	1	579	DFFHLDER+FTVSVDMMHAVSYPLR+GFPIKDDFLEQSER+GISEQNLVVSSVQHQSTMELSEAGVEAAAATSVAMNR+LDNQDFGDHATLK+LDNQDFGDHATLKR+LHLQQQLDLVATLSQLGLQELFQGPDLR+LIGQNDKADFHGGK+LPLPALFK+LTGKQEEDLANINQWVK+MEEDYPQFSSPK+MSLSSFTVNRPFLFFIMEDTIGVPLFVGSVR+NPNPSALPQLQEQR+QEEDLANINQWVK+RSPGHCK+SVPTAEETR+TKFDPSLTQK+VLHMNTGSCLPHLLSHFYQNLGPGTIR+WFLLEQPEIQVAHFPFK	1	.
IPI00118963	Mrpl12	39s ribosomal protein l12, mitochondrial.	21708	Q9DB15,	1	10	IQDVGLMPMGGMVPGPVSAAAPASEAAEEEDVPK+IQQLVQDIASLTLLEISDLNELLK+LTEAKPVDK+MLPVAASR+SEALAGAPLDNAPK	1	.
IPI00118964	Cypt12	adult male testis cdna, riken full-length enriched library,clone:1700001f04 product:hypothetical protein, full insert sequence.	13156	.	0.87	3	RAPEPTTAAAAAR	1	.
IPI00118980	Scin	isoform 1 of adseverin.	80294	Q60604-1,	0.92	5	KMAKLYMVSDASGSMK+LYMVSDASGSMK+MAQELQHPEFAR+SQLIVVEEGSEPSELMK	3	IPI00224166;IPI00753562;
IPI00118994	Apoc4	apolipoprotein c-iv.	14288	Q61268,	1	78	DRWQWFWGPGAVQGFMQTYYEDHLK+THSLCPR+THSLCPRLLCKDR+TQAWLQSSR+VLEMVEPLVTR+WQWFWGPGAVQGFMQTYYEDHLK	1	.
IPI00119004	Iah1	isoamyl acetate-hydrolyzing esterase 1 homolog.	27974	Q9DB29,	1	6	DCGTDVLDLWTLMQK+DVEEAKPELSLLGDGDY+LNSVVGEYANACLQVAR+QHVPLDEYSANLR+VILITPPPLCEAAWEK	1	.
IPI00119019	F11	coagulation factor xi.	69789	.	1	24	CLLFTFMAESSSDDPTK+CQFFTYYPSHR+CTDDAHCQFFTYATGYFPSVDHR+DIFPNTVLADLNIDSVVAPDAFVCR+DISFQGGDLSTVFTPSATYCR+ERPGVYTNVAK+QCPQQLSTCSK+SHALSGFSLQHCR+VPLVSNEECQTR+VQEMIIHDQYTTAESGYDIALLK+YVDWILEK	1	.
IPI00119022	Trmu	mitochondrial trna-specific 2-thiouridylase 1.	47240	Q9DAT5,	0.96	7	ESMGICFIGK+FVSIEDNTVLGTHK+GLALGQFAVFYK+RESMGICFIGKR+VAPEASSDSPGLHPTS	1	.
IPI00119058	Grb2	isoform 1 of growth factor receptor-bound protein 2.	25238	Q60631-1,	1	2	FNSLNELVDYHR+GDFIHVMDNSDPNWWK	3	IPI00230539;IPI00648993;
IPI00119063	Lrp1	prolow-density lipoprotein receptor-related protein 1.	504742	Q91ZX7,	1	20	AVTDEEPFLIFANR+CDADADCMDGSDEEACGTGVR+CDGEDDCGDNSDENPEECAR+CELDQCWEYCHNGGTCAASPSGMPTCR+CIPMSWTCDK+CKNNRCVPGR+CNQFVDCEDASDEMNCSATDCSSYFR+CRVNNGGCSSLCLATPGSR+CVSNMLWCNGVDDCGDGSDEIPCNK+DCPEVTCAPNQFQCSITK+EDDCENGEDETHCNK+ETLVQDNIQWPTGLAVDYHNER+GLSHPFSIDVFEDYIYGVTYINNR+IEAASMSGAGR+KLSGCSQDCEDLK+MMPECQCPPHMTGPR+MYDAQQQQVGTNK+QPEVTNPCDR+SDESASCAYPTCFPLTQFTCNNGR+SHACENDQYGKPGGCSDICLLANSHK+TCVSNCTASQFVCK+T…	1	.
IPI00119067	Tppp	tubulin polymerization-promoting protein.	23575	Q7TQD2,	0.96	2	TITFEQFQEALEELAK+TITFEQFQEALEELAKK	1	.
IPI00119087	Uros	uroporphyrinogen-iii synthase.	28504	P51163,	0.95	1	IGLDAEGAGSGNAEK	2	IPI00857060;
IPI00119095	Gm2a	ganglioside gm2 activator.	20824	Q60648,	1	4	LSQLGGFSWDNCDEGKDPAVIK+SLTIQPDPIVVPGDVVVSLEGK	1	.
IPI00119109	Tbc1d5	tbc1 domain family member 5.	91853	Q80XQ2,	0.99	5	EDQILVSLAGLK+EDQILVSLAGLKQIKDILK+GSNSTLDTEGTFNSYMK+LISPASAPGSMGGPVPGNNSSSSFSAAIPTR+QASSEMPGCTGGTTPDDFILVSK	4	IPI00625030;IPI00652958;IPI00884498;
IPI00119113	Atp6v1b2	vacuolar atp synthase subunit b, brain isoform.	56551	P62814,	1	4	AVVGEEALTSDDLLYLEFLQK+AVVQVFEGTSGIDAK+GFPGYMYTDLATIYER+QIYPPINVLPSLSR+RSGQVLEVSGSK+TVSGVNGPLVILDHVK	1	.
IPI00119115	Atp6v1e1	vacuolar proton pump subunit e 1.	26157	P50518,	1	11	ARDDLITDLLNEAK+HMMAFIEQEANEK	1	.
IPI00119169	Med8	mediator of rna polymerase ii transcription, subunit 8 homolog isoform2.	25952	.	0.83	1	VPVFSHEVVPDHLR	4	IPI00318505;IPI00648486;IPI00650043;
IPI00119181	Itgae	integrin alpha-e.	128984	Q60677,	0.91	1	ASSVASGLHYFGMSVSGGLDFNGDGLADITVGSR+IQKPVSPDVQCDDPKPVASVLVMNCK+LQCEDSSGCQSCLR+YQGVTLVGNHNGVLVCIQVQAR	4	IPI00173032;IPI00895200;IPI00895345;
IPI00119191	Ceacam12	adult female placenta cdna, riken full-length enriched library,clone:1600002e08 product:cea-related cell adhesion molecule 12, fullinsert sequence.	31715	.	0.99	23	ETMLNNGSLMIK+HVIATNSSVMGPAHSGR+MFEIARHVIATNSSVMGPAHSGR+MMNSDALSCK	2	IPI00776334;
IPI00119201	Ngdn	neuroguidin.	35659	Q9DB96,	1	10	EQYSDAPEEIR+LVPVHYDETEAER+TAVTGSLSENDPLR	1	.
IPI00119202	S100a11	protein s100-a11.	11083	P50543,	0.98	21	TEFLSFMNTELAAFTK	4	IPI00469327;IPI00474051;IPI00874704;
IPI00119220	Snrpd2	small nuclear ribonucleoprotein sm d2.	13527	P62317,	1	52	EEEEFNTGPLSVLTQSVK+MSLLNKPKSEMTPEELQK+REEEEFNTGPLSVLTQSVK+SEMTPEELQK	1	.
IPI00119224	Snrpd3	small nuclear ribonucleoprotein sm d3.	13916	P62320,	1	18	FLILPDMLK+VAQLEQVYIR	1	.
IPI00119239	Psmb6	proteasome subunit beta type-6.	25379	Q60692,	1	10	EDLMAGIIIAGWDPQEGGQVYSVPMGGMMVR+LAAIQESGVER+LTPIHDHIFCCR+SGSAADTQAVADAVTYQLGFHSIELNEPPLVHTAASLFK+VTDKLTPIHDHIFCCR	1	.
IPI00119244	Si	melanocyte protein pmel 17.	65980	Q60696,	0.99	2	EACMDISSPGCQPPAQR	2	IPI00268144;
IPI00119299	Lifr	isoform 1 of leukemia inhibitory factor receptor.	122574	P42703-1,	1	694	DRFHSCHPLETTNVK+DVSLIPETPEILDLSADFFTSSLLLK+EIICSWNPGR+EWSDWSPLK+FHSCHPLETTNVK+GAEDSTYHVAVDK+HDPNMTCDYVIK+HLTTEATPSK+HLTTEATPSKGPDTWR+IASMEIPNDDITVEQAVGLGNR+IFLTWR+INLLCQIEICK+IPALSPGDHEVTINYLNGFQSK+LNPYTAYTFR+LPISPAVEDTAAEDEEGK+LSCETHDLK+NDYIISVVAR+NLIVYWKPLPINEANGK+NSAGSSPPSK+NTETNVFPQDK+NTETNVFPQDKVVLAGSNMTICCMSPTK+NTEYTLFESISGK+SEPCLLDWR+TEPVALVLLNTMLSGK+VAPHDPTSLK+VWDCTWPAPLGVSPGTVK+WDDIPVEEL…	1	.
IPI00119514	Gata4	transcription factor gata-4.	44680	.	0.92	10	EAAAYGSGGGAAGAGLAGR+ECVNCGAMSTPLWRR+FSFPGTTGSLAAAAAAAAAR+HPNLVDMFDDFSEGRECVNCGAMSTPLWRR+LHGVPRPLAMRKEGIQTR+RNAEGEPVCNACGLYMK	1	.
IPI00119522	Cpn2	carboxypeptidase n subunit 2.	62890	Q9DBB9,	1	447	AAHSQCAYSNPEGTVLLACEESR+ALGLDEGEPAGSWDLTVEGR+EVFCSDEQLADIPPDIPPHITDIVFVETAFTTVR+GAFQSLTGLQMLK+HLEPDAFGGLPR+LAGLPEDLFCHMDILESLQLQGNQLR+LQLLNLSR+LTLDFDR+LVSLTLSHNAITDLPEHVFR+LYNNQISNTHTFCAGPAYLK+QEQLICPVNPGHLSFR+TLNLAQNLLTQLPK+VVFLNTQVR+WLNIQLSSR	1	.
IPI00119551	Plek	pleckstrin.	39901	Q9JHK5,	1	11	EDPAYLHYYDPAGGEDPLGAVHLR+GCVVTSVESSHDVK+KSDEENLFEIITADEVHYYLQAATSK+SDEENLFEIITADEVHYYLQAATSK	2	IPI00649847;
IPI00119581	Fbl	rrna 2'-o-methyltransferase fibrillarin.	34307	P35550,	1	29	DHAVVVGVYRPPPK+IVALNAHTFLR+LAAAILGGVDQIHIKPGAK+MQQENMKPQEQLTLEPYER+RVSISEGDDK+TNIIPVIEDAR+VLYLGAASGTTVSHVSDIVGPDGLVYAVEFSHR+VSISEGDDKIEYR+YRMLIAMVDVIFADVAQPDQTRIVALNAHTFLR	2	IPI00848611;
IPI00119612	Il2rg	cytokine receptor common gamma chain.	42241	P34902,	1	11	EDIQLYQTFVVQLQDPQKPQR+SWTELIVNHEPR+YNPICGSSQQWSK	3	IPI00405634;IPI00889997;
IPI00119618	Canx	calnexin.	67278	P35564,	0.98	15	APVPTGEVYFADSFDR	1	.
IPI00119632	Ftsj3	putative rrna methyltransferase 3.	95532	Q9DBE9,	1	25	DDIYVSDAEDDDDTSLESDLDPEELAGVR+DGFSGIEDDADEALEISQAQLLYK+ILDPEGLALGAVIASSK+ILDPEGLALGAVIASSKK+MDLPGVSIADEGETGMFSLR	1	.
IPI00119646	Hoxd10	homeobox protein hox-d10.	38328	P28359,	0.99	6	GAAKPQLSAAQLQMEK+LISAEVPSYQR+MSFPNSSPAANTFLVDSLISACR+SDSFYSSSASMYMPPPSADMGTYGMQTCGLLPSLAKR	1	.
IPI00119676	Apoc1	apolipoprotein c-i.	9696	P34928,	1	155	AAIEHIKQKEILTK+AWFSEAFGK+EFGNTLEDK+LKEFGNTLEDK+QKEILTK	1	.
IPI00119680	Ap1m1	ap-1 complex subunit mu-1.	48543	P35585,	1	5	EYLMRAHFGLPSVEAEDK+FEIPYFTTSGIQVR+LETGAPRPPATVTNAVSWR+YITQNGDYQLR	1	.
IPI00119689	Ap2b1	isoform 1 of ap-2 complex subunit beta-1.	104583	Q9DBG3-1,	1	4	APEVSQYIYQVYDSILK+ECHLNADTVSSK	2	IPI00378063;
IPI00119787	Lrp1b	low density lipoprotein-related protein 1b.	517034	Q9JI18,	1	65	AIVVDPVNGWMYWTDWK+CDGEKDCEDGSDEK+CNSTSLCVLPSWICDGSNDCGDYSDELK+CPLNHIACHGSSACVHLSK+CQYYVCHHYCVNSESCTIGNDGSVECVCPTR+DCPDGSDEGDLCDECSLNNGGCSNHCSVVPGR+EPVGLSIDYVENK+ISRPMALTIDYVNHR+LDGSLRATLIAGAMEHPR+LDGSLRATLIAGAMEHPRAIALDPR+NCIPMELQCDSLDDCGDGSDEQGCLK+QPQAPNPCAANEGR+RGMMYWTVIGDHSHIEEAAMDGTLRR+SLSDEEPFLILADQHEIRK+TCEIVDYCASHLR+VPPNSLQHR	1	.
IPI00119795	Reps1	ralbp1 associated eps domain containing 1 isoform 1.	86519	O54916-1,	1	8	GTTPLAPPPKPVR+ISLEVQLEQLRPFSHL+LNSELQQQLK	2	IPI00880345;
IPI00119812	Il9r	il9r protein.	52966	Q01114,	0.87	5	CTFWDSMCTLVLPK+GVSVPEQGGGGQK+LDPPSDLQSNVSSGR	2	IPI00752498;
IPI00119813	Lsm5	u6 snrna-associated sm-like protein lsm5.	9937	P62322,	0.89	2	SDKEIVGTLLGFDDFVNMVLEDVTEFEITPEGR	1	.
IPI00119818	Itih4	adult male liver cdna, riken full-length enriched library,clone:1300004a21 product:inter alpha-trypsin inhibitor, heavy chain 4,full insert sequence.	100323	.	1	74	ADAVQEATFQVELPR+AFITNFSMIIDGVTYPGVVK+AHGGTNINNAVLLAVELLDR+DIVWEPPVEPDNTK+DIVWEPPVEPDNTKR+DLSPQDQFNLIEFSGEANQWK+FEVSVNVAPGSK+FKPTLSQQQK+FQHHFK+GELGQFYR+GLMLLLNDTQHFSNNVK+ISASGAELEALEAQVLNLSLK+ITFELIYQELLQR+LGMYELLLK+LPLAAQAHPFRPPVR+LQDQGPDVLLAK+LSYQEGFPGAEISCWTVEI+LWALLTIQQQLEQR+MALDNGGLAR+MLSLPSVAQYPADPHLVVTEK+MTMNMMGLLQLSGPDK+NGIDIYSLTVDSR+NVIFVIDK+QSLVQATEENLNK+RLGMYELLLK+SDSGGSIQIEEGYFVHHFAPEN…	1	.
IPI00119892	Smarce1	swi/snf-related matrix-associated actin-dependent regulator chromatinsubfamily e member 1.	46638	O54941,	0.96	1	IAAEIAQAEEQAR	3	IPI00604836;IPI00662498;
IPI00119916	Rhpn2	rhophilin-2.	76957	Q8BWR8,	0.83	12	CATYSVGMQK+EQVRLELSFVNSDLQMLK+EVDFSIVFK+KGCNPLAQTGR+MPEGMTPLATLK+QLHAAMSQEPVK+SASTLCLPEVGLAR	1	.
IPI00119945	Nit2	nitrilase homolog 2.	30502	Q9JHW2,	1	6	AVDNQVYVATASPAR+FAELAQIYAQR+LALIQLQVSSIKSDNLTR+LYNTCSVFGPDGSLLVK+RADLYTVESK+VGLGICYDMR	1	.
IPI00119959	Banf1	barrier-to-autointegration factor.	10103	O54962,	0.97	2	DFVAEPMGEKPVGSLAGIGDVLSK+DFVAEPMGEKPVGSLAGIGDVLSKR	1	.
IPI00119973	Sp5	transcription factor sp5.	42052	Q9JHX2,	0.95	11	CPNCQAAGGAPEAEPGK+FPASAAAAAAAAAALQR+KQHVCHVPGCGKVYGK+THTGEKR	1	.
IPI00120002	Pfpl	epcs50.	83921	.	0.89	5	INPMDFQDNR+NMDMGQVMDLTYNNCK	1	.
IPI00120046	Xrn2	isoform 1 of 5'-3' exoribonuclease 2.	108687	Q9DBR1-1,	1	6	QAAYEMR+RNSLGGDVLFVGK+RPVHLDQAAFR+YAWQGVALLPFVDER	2	IPI00283057;
IPI00120070	Inpp5b	inositol polyphosphate-5-phosphatase b.	113252	.	0.81	4	DYFLSVSGNYLPSCFGSPIHTLCYMR+KTLEEIVR+LENDAQEHALFLYTHR+NITQLSYQSHMALK+QNKSKSDMSEK+RMAITGDDVSLDQIVPLSK+TIFDGFTEGEITFQPTYK+TSDHKPVSSVFDIGVR+YDTGSDDWDTSEK	2	IPI00648812;
IPI00120076	Ckmt2	creatine kinase, sarcomeric mitochondrial.	47473	Q6P8J7,	1	18	EVENVAITALEGLK+GLSLPPACSR+GTGGVDTAAVADVYDISNIDR+HNNCMAECLTPTIYAK+HNNCMAECLTPTIYAKLR+LGYILTCPSNLGTGLR+LSEMTEQDQQR+SEVELVQIVIDGVNYLVDCEK+TFLIWINEEDHTR+TVGMVAGDEESYEVFADLFDPVIK	1	.
IPI00120145	Cdc40	pre-mrna-processing factor 17.	65461	Q9DC48,	0.91	14	DICFNTAGTQFLSAAYDRYLK+ENDASNIDGFLGPWAK+HLGAVNTIVFVDENR+NMLSGYAEPAHINDFMFEQQR	2	IPI00849823;
IPI00120162	Csnk2a1	casein kinase ii subunit alpha.	45162	Q60737,	1	4	DVKPHNVMIDHEHR+GGPNIITLADIVKDPVSR+GPELLVDYQMYDYSLDMWSLGCMLASMIFR+GPELLVDYQMYDYSLDMWSLGCMLASMIFRK+VYTDVNTHRPR	2	IPI00408176;
IPI00120174	2500003M10Rik	isoform 2 of uncharacterized protein c1orf77 homolog.	23850	Q9CY57-2,	1	12	ASMQQQQQLASAR+LAQQMENRPSVQAALK	8	IPI00283671;IPI00469107;IPI00471466;IPI00471467;IPI00830185;IPI00831376;IPI00831485;
IPI00120176	Pcolce	procollagen c-endopeptidase enhancer 1.	50168	Q61398,	0.95	6	ESALSPGEDVQR+ESALSPGEDVQRGPQSR+GPGEGLTVTVSLLGVYK	2	IPI00830807;
IPI00120233	Gcdh	glutaryl-coa dehydrogenase, mitochondrial.	48647	Q60759,	0.99	7	DILGGNGISDEYHVIR+GELLGCFGLTEPNHGSDPGGMETR+GYGCAGVSSVAYGLLTR+SSRPVFDWK+TWSSAAAHTEK	2	IPI00788331;
IPI00120271	Sycn	syncollin.	14595	Q8VCK7,	1	5	CEITVWSLPGK+GIFGDWSDSISALYCK	2	IPI00875347;
IPI00120414	Dnaja3	isoform 3 of dnaj homolog subfamily a member 3, mitochondrial.	46847	Q99M87-3,	1	12	FSQLAEAYEVLSDEVK+GVQQPQGGVVATSLCR+LCVSAFGLSMGAHGPR+QYDAYGSAGFDPGTSSSGQGYWR	3	IPI00279858;IPI00347634;
IPI00120451	Fabp1	fatty acid-binding protein, liver.	14246	P12710,	1	360	AIGLPEDLIQK+GVSEIVHEGK+GVSEIVHEGKK+LTITYGPK+NEFTLGEECELETMTGEK+SVTELNGDTITNTMTLGDIVYK+SVTELNGDTITNTMTLGDIVYKR+YQLQSQENFEPFMK	1	.
IPI00120465	Retn	resistin.	12492	Q99P87,	1	5	IKQDFNSLFPNAIK+LASCPEGTAVLSCSCGSACGSWDIR+NIGLNCWTVSSR	1	.
IPI00120503	Copb1	coatomer subunit beta.	107066	Q9JIF7,	1	12	EDQFQLSLLAAMGNTQR+KEAGELKPEEEITVGPVQK+KTLQLALDLVSSR+KVIIMILNGEK+MLEVFHAIK+NEMNCKEDQFQLSLLAAMGNTQRK+TLQLALDLVSSR	1	.
IPI00120529	Rfc1	rfc1 protein.	126064	.	0.94	5	ESVSPEDSEK+HALIMDEVDGMAGNEDR+KPVNETVK+KTYSPAKHGK+LTPTSVLDYFGTESVQR	3	IPI00378168;IPI00896013;
IPI00120535	Ppp1r3f	isoform 1 of protein phosphatase 1 regulatory subunit 3f.	77464	Q9JIG4-1,	0.81	1	AVAAAGGGEGTSPTHALGILTDR+ESSWVPSSEK+SPPGAGVGGTGAGDPLLDPGLGLGPGQMSASSPDDGGCTDR	2	IPI00752434;
IPI00120709	Mrps34	28s ribosomal protein s34, mitochondrial.	25827	Q9JIK9,	1	4	AWGILTFK+EIEQVMYHDWR+LPLFGLGR	1	.
IPI00120761	Slc4a1	isoform erythrocyte of band 3 anion transport protein.	103136	P04919-1,	1	4	DHEEVLEIPDRDSEEELENIIGQIAYR+DSEEELENIIGQIAYR+GGPGDEDDPLRR	1	.
IPI00120798	Syt12	synaptotagmin-12.	46680	Q920N7,	0.88	12	EEATFESCFMR+LSVLDLPLQPFSGWLYLQDQNK+MAVDVTEYHLSVIK	1	.
IPI00120848	Ogn	mimecan.	34012	Q62000,	1	10	HPNSFICLK+LDFTGNLIEDIEDGTFSK+LSLLEELTLAENQLLR+RLDFTGNLIEDIEDGTFSK+VIHLQFNSISSLTDDTFCK	1	.
IPI00120864	Pbld	phenazine biosynthesis-like domain-containing protein 1.	32048	Q9DCG6,	1	37	AAIGDTLVQDIR+AEDGIVLDFPVYPTFPQDFHEVEDLIK+EMNLSETAFIR+GEPGGQTAPYDFYSR+GNPAAVCLLER+KLQPTDSFTQSSR+LPIFIADAFTATAFR+LQPTDSFTQSSR+NSTLTFVTMSGELK+RAEDGIVLDFPVYPTFPQDFHEVEDLIK+TLEEDAHQQIAR+VNTEPLPAIEK+WFTPVSEVPLCGHATLASAAVLFHK	1	.
IPI00120870	Postn	isoform 2 of periostin.	90255	Q62009-2,	0.99	2	ESDIMTTNGVIHVVDK+GCPAVMPIDHVYGTLGIVGATTTQHYSDVSK+HGMVIPSMYNNLGLFINHYPNGVVTVNCAR+ISTGGGETGETLQK+NALQNIILYHLTPGVYIGK+VIHGNQIATNGVVHVIDR	4	IPI00338018;IPI00339003;IPI00400421;
IPI00120871	0610038D11Rik	trm112-like protein.	14141	Q9DCG9,	0.89	1	VEWAALVQAADTLNLAEVPKEPTEGYEHDETFLR	4	IPI00459145;IPI00474537;IPI00678946;
IPI00120886	Ybx1	nuclease-sensitive element-binding protein 1.	35730	P62960,	1	61	EDVFVHQTAIK+GAEAANVTGPGGVPVQGSK+NDTKEDVFVHQTAIK+NDTKEDVFVHQTAIKK+RPQYSNPPVQGEVMEGADNQGAGEQGRPVR+SVGDGETVEFDVVEGEK+SVGDGETVEFDVVEGEKGAEAANVTGPGGVPVQGSK	2	IPI00849786;
IPI00120914	Eif3f	eukaryotic translation initiation factor 3 subunit f.	38000	Q9DCH4,	1	11	IQDALSTVLQYAEDVLSGK+LHPVILASIVDSYER+VIGLSSDLQQVGGASAR+VIGTLLGTVDK	1	.
IPI00120924	Msi2	isoform 1 of rna-binding protein musashi homolog 2.	36939	Q920Q6-1,	1	34	GFGFVTFADPASVDK+GFGFVTFENEDVVEK+IFVGGLSANTVVEDVK+KIFVGGLSANTVVEDVK+MFIGGLSWQTSPDSLR+VLGQPHHELDSK+VLGQPHHELDSKTIDPK	3	IPI00462899;IPI00462900;
IPI00120954	Pabpc2	poly a binding protein, cytoplasmic 2.	69061	.	0.99	1	ALDTMNFDVIK+GFGFVSFER+HIYVGRAQKK+IVATKPLYVALAQR+LFPLIQAMHPTLAGK+MDDETLNGLFGRFGQILSVKVMTDEGGK+QAHLTNQYIQRMASVR	1	.
IPI00121013	Pea15a	isoform 1 of astrocytic phosphoprotein pea-15.	15054	Q62048-1,	1	15	DNLSYIEHIFEISR+LDKDNLSYIEHIFEISR+RPDLLTMVVDYR+SEEITTGSAWFSFLESHNK	2	IPI00830525;
IPI00121023	Zfp202	16 days embryo head cdna, riken full-length enriched library,clone:c130037e22 product:zinc finger protein 202, full insertsequence.	73381	.	0.91	21	GQRPESGEEAVTLVEGLQK+THVSEEHHLCNECGR	1	.
IPI00121055	EG214403	complement factor h-related protein.	91654	.	1	52	CGPPPPIDNGDITSLSLPEYEPFSSVDYQCQK+CISGTINYPTCE+CQSPYQMNGSDTVTCVNSR+CVATDQLEK+GQVASCAQPPEIPNGEINGAK+GQVASCAQPPEIPNGEINGAKR+LNDKLDYECLIGHENEYK+LSVLCQDNYLTQDPEEMMCKDGR+TCGDIPELEHGSVK+TGEQVTFR+WSEPPTCLHACIIPENIMEAR	1	.
IPI00121073	Cirbp	cold-inducible rna-binding protein.	18607	P60824,	1	15	GFGFVTFENIDDAK+LFVGGLSFDTNEQALEQVFSK+YGQISEVVVVK	3	IPI00830486;IPI00831352;
IPI00121080	Map3k7	mitogen-activated protein kinase kinase kinase 7.	64228	Q62073,	0.93	4	IMWAVHNGTRPPLIKNLPKPIESLMTR+MAQEYMK+MSADMSEIEAR+QELVAELDQDEK	2	IPI00123967;
IPI00121105	Hadh	hydroxyacyl-coenzyme a dehydrogenase, mitochondrial.	34464	Q61425,	1	17	DTPGFIVNR+FILDGWHEMEPENPLFQPSPSMNNLVAQK+HVTVIGGGLMGAGIAQVAAATGHTVVLVDQTEDILAK+LGAGYPMGPFELLDYVGLDTTK+LLVPYLIEAVR+SMSSSSSASAAAKK+TFESLVDFCK	1	.
IPI00121110	Ralb	ras-related protein ral-b.	23349	Q9JIW9,	1	8	AEEWGVQYVETSAK+SALTLQFMYDEFVEDYEPTK+VFFDLMR	1	.
IPI00121120	Col5a2	collagen alpha-2(v) chain.	145018	Q3U962,	1	23	EGNPGPLGPIGPPGVR+EGPPGLRGDPGSHGR+GDPGPAGLPGSQGAPGTPGPVGAPGDAGQR+GEAGPTGPMGAMGPLGPR+GLPGPLGPPGPAGPTGEK+GMPGLPGPAGTPGK+GPTGSAGTSGPPGLAGPPGSPGPQGSTGPQGIR+GQPGSMGLPGPKGSSGDLGKPGEAGNAGVPGQR+GSQFTYGDYQSPNTAITQMTFLR+LGPQGAPGK+QSGEYWIDPNQGSAEDAIK+RGAHGMPGKPGPMGPLGIPGSSGFPGNPGMK+SGLGSQVGLMPGSVGPVGPR+SLSSQIETMR+SLSSQIETMRSPDGSK+SPDNKPVWYGLDMNR+VGPPGPAGAPGPAGPAGEPGK+VYCNMETGETCISANPASVPR	1	.
IPI00121136	Acin1	isoform 1 of apoptotic chromatin condensation inducer in the nucleus.	150691	Q9JIX8-1,	0.99	2	APVVLQPEQIVSEEETPPPLLTK+GESDDEKPRK+RSISQQKSGVSITIDDPVR	2	IPI00230677;
IPI00121190	Egfr	epidermal growth factor receptor.	134853	Q01279,	1	734	ACGPDYYEVEEDGIR+ACGPDYYEVEEDGIRK+ALMDEEDMEDVVDADEYLIPQQGFFNSPSTSR+AVNHVCNPLCSSEGCWGPEPR+CDPSCPNGSCWGGGEENCQK+CNILEGEPR+CWMIDADSRPK+DIVQNVFMSNMSMDLQSHPSSCPK+DTCPPLMLYNPTTYQMDVNPEGK+EILDEAYVMASVDNPHVCR+EISDGDVIISGNR+ESDCLVCQK+FSNNPILCNMDTIQWR+GPDNCIQCAHYIDGPHCVK+IICAQQCSHR+IPLENLQIIR+KVCNGIGIGEFK+LTQLGTFEDHFLSLQR+NLCYANTINWK+NLQEILIGAVR+NYDLSFLK+NYVVTDHGSCVR+SPSDCCHNQCAAGCTGPR+TIQEVAGYVLIALNTVER+VC…	1	.
IPI00121198	Gtf2a1	transcription initiation factor iia subunit 1.	41614	Q99PM3,	1	3	DIFLDDGVDEQVLMELK+SVIEDVINDVR	1	.
IPI00121209	Apoa1	apolipoprotein a-i.	30587	Q00623,	1	4109	AQSVIDKASETLTAQ+ARPALEDLR+ARPALEDLRHSLMPMLETLK+DFANVYVDAVK+DFWDNLEK+DFWDNLEKETDWVR+EDVELYR+ETDWVR+HSLMPMLETLK+KWKEDVELYR+LQELQGR+LSPVAEEFR+QEMNKDLEEVK+QEMNKDLEEVKQK+QKLQELQGR+QKVAPLGAELQESAR+SNPTLNEYHTR+THVDSLR+THVDSLRTQLAPHSEQMR+TKAQSVIDK+TKAQSVIDKASETLTAQ+TQLAPHSEQMR+VAPLGAELQESAR+VKDFANVYVDAVK+VQPYLDEFQK+VQPYLDEFQKK+WKEDVELYR	1	.
IPI00121240	Apon	apolipoprotein n.	27965	.	1	5	SVTLPEACTYEPGWVLYDMAQVLLETANK	1	.
IPI00121254	Mertk	proto-oncogene tyrosine-protein kinase mer.	110157	Q60805,	1	7	EIVSDPIYVEVQGLPYFIK+ELSEEVSQNGSWAQIPVQIHNATCTVR+FNCSINIPNTYQETAGISWWK+GMTPYPGVQNHEMYDYLLHGHR+LLGVCIELSSQGIPKPMVILPFMK+NGVSWSHHSTLPLGSPSPDELLFVDDSLEDSEVLM+QPESVNVTR+SPSVLTVPGLTETAVFSCEAHNDK	1	.
IPI00121264	Zfml	isoform 4 of zinc finger protein 638.	214460	Q61464-4,	0.88	5	APNPPGMRPPGPFVRPGSMGLPR+DILVLSSHKK+FYTCFPISMDGNQLSISMAPEHVDLK+GIIEDSPSETEDIFSGIVQPMVDAIAEVDK+GLSPAQKPKLASGTKPSAK+KSSASALKK+LDSFSQVGPGSETVTQK+VILQLESPESALSMYNFLK+VSAKEFGLLK	2	IPI00608012;
IPI00121267	Uroc1	probable urocanate hydratase.	74590	Q8VC12,	1	12	DHHDVSGTDSPFR+EVLSLGYHGNVVDLWER+FCPSIEMR+LLALEFAQELR+QGWLMEVTDSLDHCIAR+RYLGIENLAGK+TPNLSPEEEQLALR+VFVTSGLGGMSGAQAKAAAIVGCIGVIAEVDK	1	.
IPI00121271	0610011F06Rik	upf0585 protein c16orf13 homolog.	22687	Q9DCS2,	1	7	DTVLLEELGQASGLVLER+ISPQSNVDFDLTLR+SLDLLLCINMIHISPLNCTEGLFR+VLEVASGSGQHAAHFAQAFPNAEWQPSDVDQR	1	.
IPI00121274	C8b	isoform 1 of complement component c8 beta chain.	66229	Q8BH35-1,	1	149	AEPLYELVTATDFAYSSTVK+ALEEFQSEVSSCR+CECICPGGFQGTACEVTYR+CEGFVCAQTGR+CEYEFTLTEYESYSDFER+DAMEQGDYTLSHVTACAGGSFGIGGMVYK+ELPTPELMEAWGDAVK+EMEQYWAIDR+EVEDCVTNQPCR+GGSPCSGPASETLNC+GGTSEDITALAYK+KPYNVESYTPQTK+LASGINLFTNTFEGPVLDHR+LLCNGDNDCGDQSDEANCR+QCNNPAPHK+SLPLEYSYGEYR+STMVEDLVVLVR+SVLEVAHYK+YYAGGCSPHYILDTNFR	1	.
IPI00121279	Msln	mesothelin.	69423	Q61468,	1	4	SSEVLLPWLAGCQGPLDQSQEK+WSVSTLDALQSLVAVLDESIVQSIPK	1	.
IPI00121309	Ndufs3	nadh dehydrogenase [ubiquinone] iron-sulfur protein 3, mitochondrial.	30149	Q9DCT2,	1	12	FEIVYNLLSLR+ILTDYGFEGHPFR+QLSAFGEYVAEILPK+VVAEPVELAQEFR	1	.
IPI00121311	Csda	dbpa murine homologue.	33331	.	0.97	2	EDVFVHQTAIK+GAEAANVTGPDGVPVEGSR+NDTKEDVFVHQTAIK+NDTKEDVFVHQTAIKK+SVGDGETVEFDVVEGEK	5	IPI00274739;IPI00330591;IPI00474439;IPI00753114;
IPI00121340	Dll1	delta-like protein 1.	78448	Q61483,	0.94	4	CEHAPCHNGATCHQR+CQSQSSAGEEK+CVDLGNSYLCR+HMESQGGPFPWVAVCAGVVLVLLLLLGCAAVVVCVR+KMDLCGSSPCSNGAK+LQEFVNKK+YCEDNVDDCASSPCANGGTCR+YMCECAQGYGGPNCQFLLPEPPPGPMVVDLSER	2	IPI00420873;
IPI00121348	Sds	l-serine dehydratase.	34593	Q8VBT2,	1	10	HFVCSSAGNAGMATAYAARR+LGIPATIVVPNTTPALTIER+LKNEGATVEVVGEMLDEAIQVAK+VQLGLNGLPE	1	.
IPI00121357	Apob48r	apolipoprotein b-100 receptor.	102705	Q8VBT6,	1	14	AAESGMAEGVESQPTWHSEPGGNAGTEGQHVTEDSK+AQGTQCPGAESEDQAMLSR+GQEETSGAPDLSPER	1	.
IPI00121359	Mrpl4	39s ribosomal protein l4, mitochondrial.	33073	Q9DCU6,	0.96	9	RPVQAWVESLR	1	.
IPI00121364	Aspscr1	isoform 1 of tether containing ubx domain for glut4.	59796	Q8VBT9-1,	0.99	1	LQDAFCSR	8	IPI00381046;IPI00648116;IPI00648627;IPI00648634;IPI00648921;IPI00649204;IPI00649519;
IPI00121386	Dvl2	segment polarity protein dishevelled homolog dvl-2.	78803	Q60838,	0.95	14	EEISDDNAR+GDGGIYIGSIMK+GGEPGGTGDGGPPPSR+YNFLGISIVGQSNERGDGGIYIGSIMK	2	IPI00556704;
IPI00121421	Reln	isoform 1 of reelin.	387513	Q60841-1,	0.96	17	GFGGPFCVPVVPLPSILK+ITGGQVGTGCGTLNDGR+ITIPLPNAALTR+LCTPYMDTTGYGNLR+QQTWAIDNVYIGDGCLDMCSGHGR+TSVNENWLFHDDCTVER	3	IPI00230330;IPI00230331;
IPI00121427	S100a6	protein s100-a6.	10051	P14069,	1	14	DQEVNFQEYVAFLGALALIYNEALK+ELTIGSKLQDAEIAR+LQDAEIAR	1	.
IPI00121440	Etfb	electron transfer flavoprotein subunit beta.	27623	Q9DCW4,	1	4	EIIAVSCGPSQCQETIR+GIHVEIPGAQAESLGPLQVAR+TALAMGADR+VSVISVEEPPQR+YATLPNIMK	1	.
IPI00121462	Krt23	keratin, type i cytoskeletal 23.	48027	Q99PS0,	0.9	15	FENEHSLK+KDYSQYEENISR	1	.
IPI00121471	Serpinb6a	serpin b6.	42599	Q60854,	0.98	1	CSGNGGGDVHQGFQSLLTEVNK+FYEAELEELDFQGATEESR	2	IPI00460019;
IPI00121493	Ttc36	tetratricopeptide repeat protein 36.	20132	Q8VBW8,	1	4	AAEAGDLHTALEK+LQGDVAGALEDLER+MLADMMGQLR+QSFVQSGLLAR	1	.
IPI00121514	Stip1	stress-induced-phosphoprotein 1.	62582	Q60864,	1	44	ALSAGNIDDALQCYSEAIK+AMADPEVQQIMSDPAMR+CMMAQYNRHDSPEDVK+DAIHFYNK+DCEECIQLEPTFIK+DPQALSEHLK+EGLQNMEAR+ELDPTNMTYITNQAAVHFEK+ELIEQLQNKPSDLGTK+EPKPEPMEEDLPENK+EPKPEPMEEDLPENKK+FMNPFNLPNLYQK+KAAALEFLNR+KEPKPEPMEEDLPENK+KEPKPEPMEEDLPENKK+LAYINPDLALEEK+LDPQNHVLYSNR+LILEQMQK+LMDVGLIAIR+SLLSDPTYR+TYEEGLKHEANNLQLK+VMTTLSVLLGVDLGSMDEEEEAATPPPPPPPKK	1	.
IPI00121515	Caprin1	cytoplasmic activation/proliferation-associated protein 1 isoform c.	76664	.	1	32	LNEQYEHASIHLWDLLEGK+LNQDQLDAVSK+MPSATSHSGSGSK+QGLSGVPILSEEELSLLDEFYK+RGSGQSGPRGAPR+SFMALSQDIQK+SSGPPPPSGSSGSEAAAGAAAPASQHPATGTGAVQTEAMK+TVLELQYVLDK+YQEVTNNLEFAK	3	IPI00757359;IPI00881332;
IPI00121525	BC021614	cdna sequence bc021614.	24194	.	1	7	AFLESPEHVNRPLAACIK+AFLESPEHVNRPLAACIKM+DQQEAALVDMVNDGLEDLFR+ELPGHLKPFETLLAQNR+FQDGELTLYQSNTILR+GGQSFIVGDQISFADYR+MLLADQGQSWK+MPPYTIVYFPSR	1	.
IPI00121534	Car2	carbonic anhydrase 2.	29033	P00920,	1	233	AVQQPDGLAVLGIFLK+DFPIANGDR+EPITVSSEQMSHFR+GGPLSDSYR+HNGPENWHK+IGPASQGLQK+KYAAELHLVHWNTK+LIQFHFHWGSSDGQGSEHTVNK+SIVNNGHSFNVEFDDSQDNAVLK+TLNFNEEGDAEEAMVDNWRPAQPLK+VLEALHSIK+YAAELHLVHWNTK	1	.
IPI00121554	Prap1	proline-rich acidic protein 1.	16798	Q80XD8,	1	26	ALEPLEKDNQLGPLLPEPK+DNQLGPLLPEPK+GKHVFPEQETEK+HVFPEQETEK+QKPAAAEEK+QVLQGPEEDLDHLAHSMEDS+RPDAMTWVETEDILSHLR+SPLQGPELDLDSIDHPMSDDVQDEEVPQSRPILYR	1	.
IPI00121566	Gmpr	gmp reductase 1.	37482	Q9DCZ1,	0.98	2	GHIISDGGCTCPGDVAK	2	IPI00856958;
IPI00121596	Prpf8	pre-mrna-processing-splicing factor 8.	273600	Q99PV0,	1	36	ELGGLGMLSMGHVLIPQSDLR+EMEPLGWIHTQPNESPQLSPQDVTTHAK+FICISDLR+GPGNPVPGPLAPLPDYMSEEK+GYLPSHYER+LLENMPMPWEQIR+QNTDKGNNPKGYLPSHYER+SQEPLPDDDEEFELPEFVEPFLK+VQMLLSDR+WNVSRPSLLADSK+YELQLANPK	2	IPI00850200;
IPI00121623	Dynll1	dynein light chain 1, cytoplasmic.	10366	P63168,	0.97	4	NFGSYVTHETK	3	IPI00132734;IPI00605376;
IPI00121639	Upb1	beta-ureidopropionase.	43937	Q8VC97,	1	17	EHGGVLWNTAVVISNSGLVMGK+ELAEAVKPNYSPNIVK+IPLPTSAPVAEQVSALHK+SIEEIAEVAAMCGVNIICFQEAWNMPFAFCTR+VGQEHFPNEFTSGDGK	1	.
IPI00121644	Plekha4	isoform 1 of pleckstrin homology domain-containing family a member 4.	76668	Q8VC98-1,	0.8	4	GFPVAQADGSLSR+IDVRPPLDWGPQRQTLSRPPIPRR+RWFVLSGHCLFYYK+SPARPRPGEGPGGPGGPPEVNR	1	.
IPI00121655	Brwd1	isoform a of bromodomain and wd repeat-containing protein 1.	259026	Q921C3-1,	1	4	FCSTSEDEMSMENISPPKR+HETSYDQSEGSCSSEDDEWR+HVAPDHLLQICQR+KISFDFK+LGVDQDGTANGLPSGEGTPRR+MKLTSDAEDLSLESVCTR+QMGAVCVRPPPK+SYEELVLSNK	3	IPI00654074;IPI00750042;
IPI00121758	Tardbp	tar dna-binding protein 43.	44548	Q921F2,	1	2	LVEGILHAPDAGWGNLVYVVNYPK+VTEDENDEPIEIPSEDDGTVLLSTVTAQFPGACGLR	6	IPI00280967;IPI00459625;IPI00515147;IPI00515174;IPI00807899;
IPI00121788	Prdx1	peroxiredoxin-1.	22176	P35700,	1	86	ADEGISFR+ATAVMPDGQFK+DISLSEYK+GLFIIDDK+HGEVCPAGWKPGSDTIKPDVNK+IGYPAPNFK+KQGGLGPMNIPLISDPK+LVQAFQFTDK+QGGLGPMNIPLISDPK+QITINDLPVGR+QITLNDLPVGR+YVVFFFYPLDFTFVCPTEIIAFSDR	1	.
IPI00121833	Acaa1b	3-ketoacyl-coa thiolase a, peroxisomal.	43953	Q921H8,	1	24	AEELGLPILGVLR+AEIVPVTTTVLDDK+AEIVPVTTTVLDDKGDK+AYGVVSMCIGTGMGAAAVFEYPGN+DCLTPMGMTSENVAER+DGGSTTAGNSSQVSDGAAAVLLAR+FPQASASDVVVVHGR+IAQFLSGIPETVPLSTVNR+LKPEQLGDISVGNVLEPGAGAVMAR+NGSYDIGMACGVESMSLSGMGNPGNISSR+NTTPDELLSAVLTAVLQDVR+QCSSGLQAVANIAGGIR+QDDFALASQQK+QKQDDFALASQQK+SKAEELGLPILGVLR+SYAVVGVPPDVMGIGPAYAIPAALQK+TITVSQDEGVRPSTTMQGLAK+VNPLGGAIALGHPLGCTGAR	1	.
IPI00121851	Vbp1	prefoldin subunit 3.	22436	P61759,	1	27	DQFTTTEVNMAR+ESTNSMETR+FMELNLAQK+LHLGIPEAVFVEDVDSFMK+NLDSLEEDLDFLR+NLDSLEEDLDFLRDQFTTTEVNMAR+QPGNETADTVLK	1	.
IPI00121887	Tcea1	isoform 2 of transcription elongation factor a protein 1.	33880	P10711-1,	0.99	4	EESSSSSNVSSR+KQSTDEEVTSLAK+LLDGPSTDKDPEEK+SRISNLKDAK	2	IPI00224168;
IPI00121931	Scrn2	secernin-2.	46601	Q8VCA8,	1	4	DKESGICMDSGGFR+GLLTGEQTPPAQGLGSLFQAFVER+SSTAQEAVHVIAGLLDR+THAVILSRPSWLWGAEMGANELGVCIGNEAVWTK	2	IPI00648832;
IPI00122011	Sf3b3	isoform 1 of splicing factor 3b subunit 3.	135550	Q921M3-1,	1	10	MFLYNLTLQR+QQMAEEMVEAAGEDER+QVVIALTGGELVYFEMDPSGQLNEYTERK+TPVEEVPAAIAPFQGRVLIGVGKLLR+VMNPIQGNTLDLVQLEQNEAAFSVAVCR+YSEPLEEHGNFLITVPGGSDGPSGVLICSENYITYK	1	.
IPI00122097	Kctd9	potassium channel tetramerisation domain containing 9 isoform a.	42433	.	0.91	7	ADLSGSVLDCANLQGVK+CQGLNFSGADLSR+GVDMEGSQMTGINLR+NSQPPEDHSPISRK+VTLFLNGSPSNGK	1	.
IPI00122117	F13b	adult male liver tumor cdna, riken full-length enriched library,clone:c730005g24 product:coagulation factor xiii, beta subunit, fullinsert sequence.	76195	Q07968,	1	296	CEQGAWSSPPVCLEPCTIDVDHMNR+CNEYYLLK+CPPPPVPLNSK+CTAEGWSPNPR+DAYISETSIAGSVLR+DEEVVHCLSAGWSSQPSCR+GMCASPPVIR+IAQYYYTFK+ILHGDLIDFVCK+KLSFFCLAGYATESGK+LIENGYFHPVK+LSFFCLAGYATESGK+LSFQEALR+MSYGCSSGYK+QGYNLSPSIPLSEISAQCNR+QTGEAECQANGWSLTPQCNK+RDAYISETSIAGSVLR+RLSFQEALR+SFYFPMSVDK+TTGGKDEEVVHCLSAGWSSQPSCR+TYENGSSVEYR+VACEQPPSVENGVAHPHSEIYYSGDK+VHIECELNFVIQGSEELLCENGK+WNFDNRPLILHGEYIEFMCK	1	.
IPI00122122	C8g	complement component c8 gamma chain.	22508	Q8VCG4,	1	143	AEATTLHAAPQGAAMAVSTFR+AEATTLHAAPQGAAMAVSTFRK+EANLTEDQILFFPK+FLFQVSR+FLQEQGHR+KLDGICWQVR+KPIGSTSPISTIQAQVNFSAQK+QLFENTGVPGR+SLPVNDSVLDVFER+YGFCETADQLHILNEVPR	1	.
IPI00122139	Acaa1b	3-ketoacyl-coa thiolase b, peroxisomal.	43995	Q8VCH0,	1	22	AEELGLPILGVLR+AYGVVSMCIGTGMGAAAVFEYPGN+DCLIPMGITSENVAER+DGGSTTAGNSSQVSDGAAAVLLAR+DTTPDELLSAVLTAVLQDVK+GCFHAEIVPVTTTVLNDK+IAQFLSGIPETVPLSTVNR+LKPEQLGDISVGNVLQPGAGAIMAR+QCSSGLQAVANIAGGIR+QKQDAFALASQQK+SKAEELGLPILGVLR+SYAVVGVPPDVMGIGPAYAIPAALQK+TITVSQDEGVRPSTTMQGLAK+VNPLGGAIALGHPLGCTGAR	1	.
IPI00122174	.	scaffold attachment factor b.	109076	.	1	5	AIEDEGGNPDEIEVTSECNK+CQWSEADAPLAVVK+CYGFVTMSTAEEATK+RDWGEHGR+REPADAPGGGTGMDR+SEPVKEEGSELEQPFAQATSSVGPDR+SMSGHSGPGHMMNR	1	.
IPI00122182	Jak3	isoform 1 of tyrosine-protein kinase jak3.	122641	Q62137-1,	0.99	5	MDGHILEAEFPGLPEALSFVALVDGYFR+NILVESEAHVK+WGFGATTWEVFSGGPAHITSLEPAKK	3	IPI00134196;IPI00226202;
IPI00122222	Gfra4	isoform a3 of gdnf family receptor alpha-4.	20183	Q9JJT2-3,	0.89	2	GPPALTHALLFCGCEGSACAER+MAHCMESALLLLLLLGSASFTDGNR	3	IPI00122225;IPI00267041;
IPI00122227	Rnps1	rna/dna-binding protein.	40890	.	1	1	GYAYVEFENPDEAEK+HMDGGQIDGQEITATAVLAPWPRPPPRR	4	IPI00462424;IPI00656166;IPI00849986;
IPI00122231	Ager	advanced glycosylation end product-specific receptor.	42669	Q62151,	0.95	1	VYQIPGKPEIVDPASELTASVPNK	2	IPI00776343;
IPI00122245	Rhoc	rho-related gtp-binding protein rhoc.	22006	Q62159,	1	3	EVFEMATR+QVELALWDTAGQEDYDR	2	IPI00315100;
IPI00122265	Sh3bgrl	sh3 domain-binding glutamic acid-rich-like protein.	12811	Q9JJU8,	1	28	ENNAVYAFLGLTAPPGSK+ENVPEDSRPSTGYPLPPQIFNECQYR+GDYDAFFEAR+KQQDVLCFLEANK+QQDVLCFLEANK+VYIASSSGSTAIK	1	.
IPI00122273	Dag1	dystroglycan.	96905	Q62165,	1	4	GVHYISVSAAR+IVPTPTSPAIAPPTETMAPPVR+LFDMSAFMAGPGNAK+MQSFSEVELHNMK+RQIHATPTPVTAIGPPTTAIQEPPSR+SSEDDVYLHTVIPAVVVAAILLIAGIIAMICYRK	1	.
IPI00122312	Fgg	adult male liver tumor cdna, riken full-length enriched library,clone:c730002j02 product:fibrinogen, gamma polypeptide, full insertsequence.	50349	Q8VCM7,	1	1213	AIQVYYNPDQPPKPGMIDSATQK+CHAGHLNGVYHQGGTYSK+DCQEIANK+DNCCILDER+DSVQIHDTTGK+EGFGHLSPTGTTEFWLGNEK+ESGLYFIRPLK+FEGNCAEQDGSGWWMNK+FGSFCPTTCGIADFLSSYQTDVDNDLR+IDGSLDFK+IDGSLDFKK+IHLISMQSTIPYALR+KMVEEIVK+LSIGEGQQHHMGGSK+LTYAYFIGGDAGDAFDGYDFGDDPSDK+MVEEIVKYEALLLTHETSIR+QQFLVYCEIDGSGNGWTVLQK+QQFLVYCEIDGSGNGWTVLQKR+RIDGSLDFK+SSTTNGFDDGIIWATWK+TLEDILFR+TSTADYAMFR+VAQLEAQCQEPCK+VAQLEAQCQEPCKDSVQIHDTTGK+VAQLE…	1	.
IPI00122346	Ssr4	10 day old male pancreas cdna, riken full-length enriched library,clone:1810061c01 product:signal sequence receptor, delta, full insertsequence.	19008	Q62186,	0.98	1	FFDEESYSLLR	1	.
IPI00122383	Imp3	u3 small nucleolar ribonucleoprotein protein imp3.	21777	Q921Y2,	1	6	QVDFLNWEVTDHNLHELR+SMEDFVTWVDSSK+VGPDVVTDPAFLVTR	1	.
IPI00122400	Ddx20	probable atp-dependent rna helicase ddx20.	91719	Q9JJY4,	0.81	36	IPCLSSFK+MEGLECHVFIGGTPLSQDK+VLISTDLTSR	2	IPI00875808;
IPI00122405	Serpini2	serpin i2.	45776	Q9JK88,	0.91	1	LVLVNAIYFKGDWK	1	.
IPI00122421	Rpl27	60s ribosomal protein l27.	15798	P61358,	1	22	NIDDGTSDRPYSHALVAGIDR+TVVNKDVFRDPALK+VYNYNHLMPTR+YSVDIPLDK	1	.
IPI00122426	Rpl19	60s ribosomal protein l19.	23466	P84099,	1	7	HMYHSLYLK+ILMEHIHK	5	IPI00264398;IPI00648315;IPI00754211;IPI00850221;
IPI00122429	Rbp4	retinol-binding protein 4.	23206	Q00724,	1	1510	DPEGLFLQDNIIAEFSVDEK+DPNGLSPETR+FSGLWYAIAK+GHMSATAK+GNDDHWIIDTDYDTFALQYSCR+KDPEGLFLQDNIIAEFSVDEK+LLSNWEVCADMVGTFTDTEDPAK+LQNLDGTCADSYSFVFSR+MKYWGVASFLQR+QEELCLER+QRQEELCLER+YWGVASFLQR	2	IPI00756893;
IPI00122438	Fbn1	fibrillin-1.	312266	Q61554,	1	8	CDEGYESGFMMMK+CEDIDECSTIPGVCDGGECTNTVSSYFCK+CICNSGYEVDITGK+CICPPGYSLQNDK+CLCYDGFMASEDMK+CNEGYEVAPDGR+CPTGYYLNEDTR+CSNQLPQSITK+DINECKMIPSLCTHGKCR+EIPGVCENGVCINMVGSFR+HSCGDGFCSRPNMCTCPSGQISPSCGSR+QICPFGSGIIVGPDDSAVDMDECK+TCVDINECVLDPGK+YQCACNPGYHPTHDR	3	IPI00338565;IPI00828222;
IPI00122471	Gltscr2	putative uncharacterized protein.	55793	.	0.96	18	LAEEPLGLEVDQFLEDVR+QLALPTSEQAATQESVFR	1	.
IPI00122475	Camp	adult inner ear cdna, riken full-length enriched library,clone:f930015n03 product:cathelicidin antimicrobial peptide, fullinsert sequence.	20750	.	0.93	1	LLDLDPEPQGDEDPDTPK+QCMGAVTLNPAADSFDISCNEPGAQPFR	2	IPI00875797;
IPI00122549	Vdac1	isoform pl-vdac1 of voltage-dependent anion-selective channel protein1.	32351	Q60932-1,	1	9	EHINLGCDVDFDIAGPSIR+GALVLGYEGWLAGYQMNFETSKSR+GYGFGLIKLDLK+LTFDSSFSPNTGK+LTFDSSFSPNTGKK+REHINLGCDVDFDIAGPSIR+VNNSSLIGLGYTQTLKPGIK+WTEYGLTFTEK	2	IPI00230540;
IPI00122684	Eno2	enolase.	34804	.	0.99	3	AAVPSGASTGIYEALELR+GNPTVEVDLYTAK+SGETEDTFIADLVVGLCTGQIK+YITGDQLGALYQDFVR	2	IPI00331704;
IPI00122698	Rbbp7	histone-binding protein rbbp7.	47790	Q60973,	1	2	NTPFLYDLVMTHALQWPSLTVQWLPEVTKPEGK+TPSSDVLVFDYTK	4	IPI00776143;IPI00776339;IPI00828216;
IPI00122743	Dars	aspartyl-trna synthetase, cytoplasmic.	57117	Q922B2,	1	24	ALHHGIDLEK+AYIDSFR+EAGVEMDDEEDLSTPNEK+FGAPPHAGGGIGLER+GEEILSGAQR+IHDPQLLTER+LEYCEALAMLR+VTMLFLGLHNVR	2	IPI00222457;
IPI00122815	P4hb	17 days embryo kidney cdna, riken full-length enriched library,clone:i920160l24 product:prolyl 4-hydroxylase, beta polypeptide, fullinsert sequence.	57058	.	1	54	HNQLPLVIEFTEQTAPK+IKPHLMSQEVPEDWDKQPVK+ILFIFIDSDHTDNQR+KNVFVEFYAPWCGHCK+LGETYKDHENIIIAK+LITLEEEMTK+MDSTANEVEAVK+QFLLAAEAIDDIPFGITSNSGVFSK+SNFEEALAAHK+TGPAATTLSDTAAAESLVDSSEVTVIGFFK+VDATEESDLAQQYGVR+VLVGANFEEVAFDEK+YKPESDELTAEK+YQLDKDGVVLFK	2	IPI00133522;
IPI00122845	Rsf1	remodeling and spacing factor 1.	161750	.	1	17	EVLKDDIKQEEETCK+KKPDCPPQTVDSESK+MAAAAAAAAAAAAAAMAPPGCPGSCPNFAVVCSFLER+VGSPLDYSLVDLPSTNGQSPGK+YLIKICQEFNSTWAWEMEK+YSSNDESEGSESDK	1	.
IPI00122858	Saps3	isoform 1 of saps domain family member 3.	94653	Q922D4-1,	0.94	2	CTAPLTPSSSPEQR	2	IPI00720007;
IPI00122862	Mthfd1	c-1-tetrahydrofolate synthase, cytoplasmic.	101256	Q922D8,	1	5	KGEPISCEDLGVSGTLTVLMK+MFGVPVVVAVNVFK+MHGGGPTVTAGLPLPK+TDPTTLTDDEINR+THLSLSHNPEQK	1	.
IPI00122973	Icam1	isoform 1 of intercellular adhesion molecule 1.	58844	P13597-1,	1	28	ADGALLPIGVVK+CVLELADQILETQR+EDLSLGLETQWLKDELESGPNWK+KADGALLPIGVVK+LDTPDLLEVGTQQK+LFCSLEGLFPASEAR+SFFCSAALEVAGK+TFDLPATIPK	2	IPI00230702;
IPI00122977	Serping1	plasma protease c1 inhibitor.	55638	P97290,	1	349	DFACVHQALK+FLPTYLTMPHIK+FPVFMGR+GVTSVSQIFHSPDLAIR+HETVLELTESGVEAAAASAISFGR+KLLDSLPSDTR+LEFFDFTYDLNLCGLTEDPDLQVSAMK+LLDSLPSDTR+LSEALTDFSVK+LYHAFSATK+MMAPFFYK+SLPIFEVQRPFLFLLWDQQHR+SNLESILSYPK+SSQDMLSVMEK+TNMAFSPFSIASLLTQVLLGAGDSTK+VLGPDSAANLELINTWVAENTNHK+YPVAQFDDHTLK	1	.
IPI00123006	Gmppa	mannose-1-phosphate guanyltransferase alpha.	46244	Q922H4,	1	4	DQILAGAPEAFFVLNADVCSDFPLSAMLEAHR+LLPAITILGCR+MLKAVILIGGPQK+VEGTPNDPNPNDPR	2	IPI00761856;
IPI00123007	Rpl31	60s ribosomal protein l31.	14463	P62900,	1	31	EYTINIHK+LYTLVTYVPVTTFK+LYTLVTYVPVTTFKNLQTVNVDEN+SAINEVVTR	2	IPI00677102;
IPI00123040	Ptprk	receptor-type tyrosine-protein phosphatase kappa.	164186	P35822,	1	7	KESEETIIQTDEDVPGPVPVK+LQAEDCSIACLPR+NHDKNRFMDMLPPDR+RSFLKLILQVEK+SGMFCAIGIVVEMVK+SGMFCAIGIVVEMVKR+TIIHCLNGGGR	1	.
IPI00123119	Atr	ataxia telangiectasia and rad3 related.	301021	Q9JKK8,	0.99	8	AVMHFESFITEKK+DSCIEFSHWIITR+EILTKAIHMK+EQILEHESIGLLR+ETSETTDLQTTLQLSMK+IAATPSCHMLHK+IGEHYQQVFNGLSILASFASSDDPYQGPR+IQCQAQQENLSGNNDEVSPK+KMALTSLMSLMK+LAELYVER+QDVAHHR	1	.
IPI00123129	Snd1	staphylococcal nuclease domain-containing protein 1.	102088	Q78PY7,	1	9	DTNGENIAESLVAEGLATR+DTPDEPWAFPAR+LRPLYDIPYMFEAR	1	.
IPI00123196	Dcn	decorin.	39809	P28654,	0.8	2	DLHTLILVNNK+YWEIFPNTFR	1	.
IPI00123199	Nap1l1	nucleosome assembly protein 1-like 1.	45345	P28656,	1	18	FEIINAIYEPTEEECEWKPDEEDEVSEELKEK+FYEEVHDLER+GIPEFWLTVFK+KYAVLYQPLFDK+LDGLVDTPTGYIESLPK+NVDLLSDMVQEHDEPILK+YAVLYQPLFDK	1	.
IPI00123223	Mug1	murinoglobulin-1.	165298	P28665,	1	1007	AFIFIDESHITHAFTWLSQK+AHFSVMGDILSSAIR+ALMAYAFALAGNQNK+ALMAYAFALAGNQNKR+ALSCLESSWK+AQELSYTSATTTDQHGLAEFSIDTTCISGSSLHIK+AVDQSVLLLKPESELSPSWIYNLPGMQQNK+DGSYSAFGDQNGER+DLFQCVSFIIPR+DPSSNDPLTETIR+EEDSCSYFYCMEER+EEHSFTVMEFVLPR+EGNTWLTAFVLK+ESGEKEEHSFTVMEFVLPR+ESVVFVQTDKPVYKPGQSVK+EVNSQLDNNGCSTQEVNITELQSK+FALEIPVEFSMVPMAK+FSTSQSLPASQTR+GGVDDEMTLSAYITMALLESSLPATHPVVSK+GPTHEFSK+HGIPFFVK+HKDGSYSAFGDQNGER+HT…	1	.
IPI00123264	Pole3	dna polymerase epsilon subunit 3.	16629	Q9JKP7,	0.98	8	TLNASDVLSAMEEMEFQR	1	.
IPI00123278	Pycr2	pyrroline-5-carboxylate reductase 2.	33659	Q922Q4,	1	16	ELQSMADQEKVSPAALK+ELQSMADQEKVSPAALKK+GFTAAGVLSAHK+HIVVSCAAGVTISSVEK+LGAQALLGAAK	1	.
IPI00123292	Fubp1	16 days neonate thymus cdna, riken full-length enriched library,clone:a130068c19 product:far upstream element binding protein 1 (fusebinding protein 1) (fbp) homolog.	74486	.	1	7	AGLVIGKGGETIK+IAQITGPPDR+IQFKPDDGTTPDR+IQIAPDSGGLPER+MVMIQDGPQNTGADKPLR+SCMLTGTPESVQSAK+VPDGMVGFIIGR	3	IPI00467635;IPI00874931;
IPI00123316	Tpm1	isoform 1 of tropomyosin alpha-1 chain.	32681	P58771-1,	0.96	1	ATDAEADVASLNR+EDKYEEEIK+IQLVEEELDR+KATDAEADVASLNR+KLVIIESDLER+KYEEVAR+QLEDELVSLQK+RIQLVEEELDR	7	IPI00227835;IPI00403987;IPI00404662;IPI00830427;IPI00830533;IPI00830884;
IPI00123329	Adam15	isoform 4 of adam 15.	48417	O88839-4,	0.97	4	RTDLLPR+VALVGLEAWTQHNLIEMSSNPAVLLDNFLR+VVQDSPPMSLADVLQTGLPEALR	4	IPI00135185;IPI00378498;IPI00395062;
IPI00123333	Wbp11	ww domain-binding protein 11.	69875	Q923D5,	1	3	AVSILPLLGHGVPR+KATATISAKPQITNPK+KLEVEYEQKR+KVGFALDLPPR+KVGFALDLPPRR+SGPSVAVSVQTK	1	.
IPI00123342	Hyou1	hypoxia up-regulated protein 1.	111181	Q9JKR6,	1	98	AANSLEAFIFETQDK+AHFNLDESGVLSLDR+DEPAEQGELK+EAGMQPQLQIR+LLCWALVAVLLADLLALSDTLAVMSVDLGSESMK+LPATEKPVLLSK+LSATSTWLEDEGFGATTVMLK+LYQPEYQEVSTEEQR+NINADEAAAMGAVYQAAALSK+QADNPHVALYR+RLLCWALVAVLLADLLALSDTLAVMSVDLGSESMK+SLAEDFAEQPIK+TLGGLEMELR+TVLSANADHMAQIEGLMDDVDFK+VAIVKPGVPMEIVLNK+VLQLINDNTATALSYGVFR+VLQLINDNTATALSYGVFRR+VPGPVQQALQSAEMSLDQIEQVILVGGATR+YFQHLLGK+YSHDFNFHINYGDLGFLGPEDLR	1	.
IPI00123354	Ubac1	ubiquitin-associated domain-containing protein 1.	45531	Q8VDI7,	1	2	KPSPEELDQGIDPNSPLFQAILDNPVVQLGLTNPK+LLALNPDAVELFKK	3	IPI00754190;IPI00755811;
IPI00123390	Acsl6	acyl-coa synthetase long-chain family member 6 isoform 1.	80786	.	0.81	1	RAEFLGSGLLQHDCK	9	IPI00262693;IPI00404113;IPI00553736;IPI00553820;IPI00625955;IPI00649460;IPI00649775;IPI00880399;
IPI00123494	Psmd2	26s proteasome non-atpase regulatory subunit 2.	100203	Q8VDM4,	1	14	AELATEEFLPVTPILEGFVILR+DKTPVQSQQPSATTPSGADEK+KEAPADMGAHQGVAVLGIALIAMGEEIGAEMALR+SSMEVAGVTALACGMIAVGSCNGDVTSTILQTIMEK+TPVQSQQPSATTPSGADEK+VGQAVDVVGQAGKPK	1	.
IPI00123501	Hnrnpul1	isoform 1 of heterogeneous nuclear ribonucleoprotein u-like protein 1.	96002	Q8VDM6-1,	1	22	ANFTLPDVGDFLDEVLFIELQR+HLPSTEPDPHVVR+KRNYILDQTNVYGSAQR+TDEEGKDVPDHAVLEMK+YNILGTNAIMDK	2	IPI00742433;
IPI00123503	Med22	isoform 2 of mediator of rna polymerase ii transcription subunit 22.	16436	Q62276-2,	0.98	5	ATQGEQDNYEMHVR+ETLLQSYNK	3	IPI00655148;IPI00750373;
IPI00123510	Pycr1	pyrroline-5-carboxylate reductase 1, mitochondrial.	32373	Q922W5,	0.94	4	GFTAAGVLAAHK+LGAQALLGAAK	2	IPI00648009;
IPI00123516	Insrr	insulin receptor-related protein.	144746	Q9WTL4,	0.99	6	DVGLPSLGAVLR+DVGLPSLGAVLRGAVR+FVMDGGVLEELENCPIQLQELMR+GMACTAGGDCCHSECLGGCSQPEDPR+NGNITYYLVLWQR+RLGEEATVLCVSRLR	2	IPI00896646;
IPI00123518	Lypla2	acyl-protein thioesterase 2.	24794	Q9WTL7,	1	13	ALIEHEMK+DLAILQCHGELDPMVPVR+ETAAVIFLHGLGDTGHSWADALSTIR+MCGNTMSVPLLTDAATVSGAER+MVMPSWFDLMGLSPDAPEDEAGIK+TYPGVMHSSCPQEMAAVK	1	.
IPI00123537	Nfx1	isoform 1 of transcriptional repressor nf-x1.	123811	B1AY10-1,	1	9	APGSSTLQK+EHKCPLICGR+EVVIADPR+LCHEGDCGPCSR+NYSSSPPCHLPR+QPGQDCPHSCNLLCHPGPCPPCPAFTTK+SNIPCHLVDISCGLPCSAMLPCGMHK	1	.
IPI00123557	Ruvbl2	ruvb-like 2.	51113	Q9WTM5,	1	3	GTSYQSPHGIPIDLLDR+QASQGMVGQLAAR+QASQGMVGQLAARR+TAIAMGMAQALGPDTPFTAIAGSEIFSLEMSK+TQGFLALFSGDTGEIK+TTEMETIYDLGTK	1	.
IPI00123565	Aatf	isoform 1 of protein aatf.	59482	Q9JKX4-1,	1	17	DLDEEIFDDDDFYHQLLR+EADPEADPEEATR+HIVNGAKPNTESEEISSEDDELVGEK+NQIALWDQLLEGR+SILTQIDHIMMDK	1	.
IPI00123576	ENSMUSG00000076532	anti-myosin immunoglobulin light chain variable region.	12724	.	0.88	1	TSNLASGVPAR	3	IPI00138207;IPI00675269;
IPI00123589	Ubxn1	sapk substrate protein 1.	33573	Q922Y1,	1	7	AFSEADMERPLQELGLVPSAVLIVAK+AFSEADMERPLQELGLVPSAVLIVAKK+LPDGTSLTQTFR+SSPPATDPGPVPSSPSQEPPTK	1	.
[truncated: 1,892 more rows]

## Sheet: 1.0 cm
IPI	Gene	Description	Molecular Weight	SwissProt Accession	Protein Prophet Score	Total Peptides	Peptide Sequence(s)	# Indistinguishable IPIs	Indistinguishable IPIs
[truncated: 1,774 more rows]

[truncated: 1 more sheets: Regression]
